# Supplementary material for: Reconciling the signal and noise of atmospheric warming on decadal timescales
Source: Copernicus journal article supplement (doi:10.5194/esd-2016-35), 2016-08-23
Supplement: Supplementary file 1 [file Models_output_step_data-Jones&Ricketts.xlsx]

## Sheet: Readme
This workbook contains the data produced by the multi-step Maronna-Yohai bivariate test for the RCP4.5 multi-model ensemble, the input and output time series and summary data (with a number of figures). It also contains the summary data for the 2.6, 6.0 and 8.5 ensembles and the data for the comparison chart produced from the HadGEM-ES run3 (r3i1p1), shown in Figure 8.

## Sheet: RCP45 steps
Seq	Source	BreakSet	DatasetNo	SetNo	SetNoInData	Type	Model	Treat	%BreakSet	Year	Predecessor	Successor	%SegmentFound	Ti	Shift	%YearOverall	ModalYear	ModalValue	SecondModalYear	SecondModalValue
1	r10i1p1_CSIRO–Mk3–6–0_RCP4.5_032.final.csv	[1861.0, 1900, 1921, 2001, 2015, 2025, 2041, 2062, 2069, 2083, 2100.0]	1	1	1	r10i1p1	CSIRO–Mk3–6–0	RCP4.5	100	1900	1861	1921	100	19.7491	0.154951	100	1900	1	0	0
2	r10i1p1_CSIRO–Mk3–6–0_RCP4.5_032.final.csv	[1861.0, 1900, 1921, 2001, 2015, 2025, 2041, 2062, 2069, 2083, 2100.0]	1	1	1	r10i1p1	CSIRO–Mk3–6–0	RCP4.5	100	1921	1900	2001	100	36.897	0.225125	100	1921	0.82	1927	0.16
3	r10i1p1_CSIRO–Mk3–6–0_RCP4.5_032.final.csv	[1861.0, 1900, 1921, 2001, 2015, 2025, 2041, 2062, 2069, 2083, 2100.0]	1	1	1	r10i1p1	CSIRO–Mk3–6–0	RCP4.5	100	2001	1921	2015	100	62.8812	0.505392	100	2001	0.99	1998	0.01
4	r10i1p1_CSIRO–Mk3–6–0_RCP4.5_032.final.csv	[1861.0, 1900, 1921, 2001, 2015, 2025, 2041, 2062, 2069, 2083, 2100.0]	1	1	1	r10i1p1	CSIRO–Mk3–6–0	RCP4.5	100	2015	2001	2025	100	17.3967	0.387921	100	2015	0.95	2016	0.05
5	r10i1p1_CSIRO–Mk3–6–0_RCP4.5_032.final.csv	[1861.0, 1900, 1921, 2001, 2015, 2025, 2041, 2062, 2069, 2083, 2100.0]	1	1	1	r10i1p1	CSIRO–Mk3–6–0	RCP4.5	100	2025	2015	2041	100	17.6391	0.281906	100	2025	0.89	2024	0.1
6	r10i1p1_CSIRO–Mk3–6–0_RCP4.5_032.final.csv	[1861.0, 1900, 1921, 2001, 2015, 2025, 2041, 2062, 2069, 2083, 2100.0]	1	1	1	r10i1p1	CSIRO–Mk3–6–0	RCP4.5	100	2041	2025	2062	100	30.242	0.554427	100	2041	1	0	0
7	r10i1p1_CSIRO–Mk3–6–0_RCP4.5_032.final.csv	[1861.0, 1900, 1921, 2001, 2015, 2025, 2041, 2062, 2069, 2083, 2100.0]	1	1	1	r10i1p1	CSIRO–Mk3–6–0	RCP4.5	100	2062	2041	2069	100	16.1154	0.368495	100	2062	0.74	2056	0.11
8	r10i1p1_CSIRO–Mk3–6–0_RCP4.5_032.final.csv	[1861.0, 1900, 1921, 2001, 2015, 2025, 2041, 2062, 2069, 2083, 2100.0]	1	1	1	r10i1p1	CSIRO–Mk3–6–0	RCP4.5	100	2069	2062	2083	100	12.5212	0.204078	100	2069	0.93	2068	0.03
9	r10i1p1_CSIRO–Mk3–6–0_RCP4.5_032.final.csv	[1861.0, 1900, 1921, 2001, 2015, 2025, 2041, 2062, 2069, 2083, 2100.0]	1	1	1	r10i1p1	CSIRO–Mk3–6–0	RCP4.5	100	2083	2069	2100	100	21.5621	0.278918	100	2083	0.97	2084	0.03
Seq	Source	BreakSet	DatasetNo	SetNo	SetNoInData	Type	Model	Treat	%BreakSet	Year	Predecessor	Successor	%SegmentFound	Ti	Shift	%YearOverall	ModalYear	ModalValue	SecondModalYear	SecondModalValue
10	r12i1p1_EC–EARTH_RCP4.5_039.final.csv	[1861.0, 1883, 1915, 1977, 1997, 2012, 2019, 2034, 2050, 2071, 2100.0]	2	2	1	r12i1p1	EC–EARTH	RCP4.5	2	1883	1861	1915	100	19.2797	–0.136069701971	100	1883	1	0	0
11	r12i1p1_EC–EARTH_RCP4.5_039.final.csv	[1861.0, 1883, 1915, 1977, 1997, 2012, 2019, 2034, 2050, 2071, 2100.0]	2	2	1	r12i1p1	EC–EARTH	RCP4.5	2	1915	1883	1977	2	78.1183	0.441057	100	1915	1	0	0
12	r12i1p1_EC–EARTH_RCP4.5_039.final.csv	[1861.0, 1883, 1915, 1977, 1997, 2012, 2019, 2034, 2050, 2071, 2100.0]	2	2	1	r12i1p1	EC–EARTH	RCP4.5	2	1977	1915	1997	2	61.885	0.371068	100	1977	0.99	1976	0.01
13	r12i1p1_EC–EARTH_RCP4.5_039.final.csv	[1861.0, 1883, 1915, 1977, 1997, 2012, 2019, 2034, 2050, 2071, 2100.0]	2	2	1	r12i1p1	EC–EARTH	RCP4.5	2	1997	1977	2012	100	27.7337	0.385139	100	1997	0.78	1999	0.15
14	r12i1p1_EC–EARTH_RCP4.5_039.final.csv	[1861.0, 1883, 1915, 1977, 1997, 2012, 2019, 2034, 2050, 2071, 2100.0]	2	2	1	r12i1p1	EC–EARTH	RCP4.5	2	2012	1997	2019	100	13.3217	0.229989	100	2012	0.84	2011	0.08
15	r12i1p1_EC–EARTH_RCP4.5_039.final.csv	[1861.0, 1883, 1915, 1977, 1997, 2012, 2019, 2034, 2050, 2071, 2100.0]	2	2	1	r12i1p1	EC–EARTH	RCP4.5	2	2019	2012	2034	100	16.076	0.268291	100	2019	0.9	2018	0.05
16	r12i1p1_EC–EARTH_RCP4.5_039.final.csv	[1861.0, 1883, 1915, 1977, 1997, 2012, 2019, 2034, 2050, 2071, 2100.0]	2	2	1	r12i1p1	EC–EARTH	RCP4.5	2	2034	2019	2050	75	23.1115	0.351308	100	2034	0.74	2035	0.22
17	r12i1p1_EC–EARTH_RCP4.5_039.final.csv	[1861.0, 1883, 1915, 1977, 1997, 2012, 2019, 2034, 2050, 2071, 2100.0]	2	2	1	r12i1p1	EC–EARTH	RCP4.5	2	2050	2034	2071	75	26.3638	0.402332	75	2050	0.97	2048	0.03
18	r12i1p1_EC–EARTH_RCP4.5_039.final.csv	[1861.0, 1883, 1915, 1977, 1997, 2012, 2019, 2034, 2050, 2071, 2100.0]	2	2	1	r12i1p1	EC–EARTH	RCP4.5	2	2071	2050	2100	75	30.7579	0.311746	75	2071	0.76	2073	0.17
19	r12i1p1_EC–EARTH_RCP4.5_039.final.csv	[1861.0, 1883, 1915, 1940, 1977, 1997, 2012, 2019, 2034, 2043, 2055, 2073, 2100.0]	2	3	2	r12i1p1	EC–EARTH	RCP4.5	1	1883	1861	1915	100	19.2797	–0.136069701971	100	1883	1	0	0
20	r12i1p1_EC–EARTH_RCP4.5_039.final.csv	[1861.0, 1883, 1915, 1940, 1977, 1997, 2012, 2019, 2034, 2043, 2055, 2073, 2100.0]	2	3	2	r12i1p1	EC–EARTH	RCP4.5	1	1915	1883	1940	98	46.0114	0.37637	100	1915	1	0	0
21	r12i1p1_EC–EARTH_RCP4.5_039.final.csv	[1861.0, 1883, 1915, 1940, 1977, 1997, 2012, 2019, 2034, 2043, 2055, 2073, 2100.0]	2	3	2	r12i1p1	EC–EARTH	RCP4.5	1	1940	1915	1977	98	22.7332	0.180621	98	1921	0.5	1940	0.37
22	r12i1p1_EC–EARTH_RCP4.5_039.final.csv	[1861.0, 1883, 1915, 1940, 1977, 1997, 2012, 2019, 2034, 2043, 2055, 2073, 2100.0]	2	3	2	r12i1p1	EC–EARTH	RCP4.5	1	1977	1940	1997	98	44.6034	0.327469	100	1977	1	0	0
23	r12i1p1_EC–EARTH_RCP4.5_039.final.csv	[1861.0, 1883, 1915, 1940, 1977, 1997, 2012, 2019, 2034, 2043, 2055, 2073, 2100.0]	2	3	2	r12i1p1	EC–EARTH	RCP4.5	1	1997	1977	2012	100	27.7337	0.385139	100	1997	0.78	1999	0.15
24	r12i1p1_EC–EARTH_RCP4.5_039.final.csv	[1861.0, 1883, 1915, 1940, 1977, 1997, 2012, 2019, 2034, 2043, 2055, 2073, 2100.0]	2	3	2	r12i1p1	EC–EARTH	RCP4.5	1	2012	1997	2019	100	13.3217	0.229989	100	2012	0.84	2011	0.08
25	r12i1p1_EC–EARTH_RCP4.5_039.final.csv	[1861.0, 1883, 1915, 1940, 1977, 1997, 2012, 2019, 2034, 2043, 2055, 2073, 2100.0]	2	3	2	r12i1p1	EC–EARTH	RCP4.5	1	2019	2012	2034	100	16.076	0.268291	100	2019	0.9	2018	0.05
26	r12i1p1_EC–EARTH_RCP4.5_039.final.csv	[1861.0, 1883, 1915, 1940, 1977, 1997, 2012, 2019, 2034, 2043, 2055, 2073, 2100.0]	2	3	2	r12i1p1	EC–EARTH	RCP4.5	1	2034	2019	2043	7	17.9485	0.262851	100	2034	1	0	0
27	r12i1p1_EC–EARTH_RCP4.5_039.final.csv	[1861.0, 1883, 1915, 1940, 1977, 1997, 2012, 2019, 2034, 2043, 2055, 2073, 2100.0]	2	3	2	r12i1p1	EC–EARTH	RCP4.5	1	2043	2034	2055	7	14.7467	0.272299	7	2044	0.84	2043	0.06
28	r12i1p1_EC–EARTH_RCP4.5_039.final.csv	[1861.0, 1883, 1915, 1940, 1977, 1997, 2012, 2019, 2034, 2043, 2055, 2073, 2100.0]	2	3	2	r12i1p1	EC–EARTH	RCP4.5	1	2055	2043	2073	1	17.6421	0.27506	8	2055	0.78	2054	0.16
29	r12i1p1_EC–EARTH_RCP4.5_039.final.csv	[1861.0, 1883, 1915, 1940, 1977, 1997, 2012, 2019, 2034, 2043, 2055, 2073, 2100.0]	2	3	2	r12i1p1	EC–EARTH	RCP4.5	1	2073	2055	2100	1	25.7062	0.26365	1	2077	0.53	2073	0.29
30	r12i1p1_EC–EARTH_RCP4.5_039.final.csv	[1861.0, 1883, 1915, 1940, 1977, 1997, 2012, 2019, 2034, 2048, 2064, 2077, 2100.0]	2	4	3	r12i1p1	EC–EARTH	RCP4.5	17	1883	1861	1915	100	19.2797	–0.136069701971	100	1883	1	0	0
31	r12i1p1_EC–EARTH_RCP4.5_039.final.csv	[1861.0, 1883, 1915, 1940, 1977, 1997, 2012, 2019, 2034, 2048, 2064, 2077, 2100.0]	2	4	3	r12i1p1	EC–EARTH	RCP4.5	17	1915	1883	1940	98	46.0114	0.37637	100	1915	1	0	0
32	r12i1p1_EC–EARTH_RCP4.5_039.final.csv	[1861.0, 1883, 1915, 1940, 1977, 1997, 2012, 2019, 2034, 2048, 2064, 2077, 2100.0]	2	4	3	r12i1p1	EC–EARTH	RCP4.5	17	1940	1915	1977	98	22.7332	0.180621	98	1921	0.5	1940	0.37
33	r12i1p1_EC–EARTH_RCP4.5_039.final.csv	[1861.0, 1883, 1915, 1940, 1977, 1997, 2012, 2019, 2034, 2048, 2064, 2077, 2100.0]	2	4	3	r12i1p1	EC–EARTH	RCP4.5	17	1977	1940	1997	98	44.6034	0.327469	100	1977	1	0	0
34	r12i1p1_EC–EARTH_RCP4.5_039.final.csv	[1861.0, 1883, 1915, 1940, 1977, 1997, 2012, 2019, 2034, 2048, 2064, 2077, 2100.0]	2	4	3	r12i1p1	EC–EARTH	RCP4.5	17	1997	1977	2012	100	27.7337	0.385139	100	1997	0.78	1999	0.15
35	r12i1p1_EC–EARTH_RCP4.5_039.final.csv	[1861.0, 1883, 1915, 1940, 1977, 1997, 2012, 2019, 2034, 2048, 2064, 2077, 2100.0]	2	4	3	r12i1p1	EC–EARTH	RCP4.5	17	2012	1997	2019	100	13.3217	0.229989	100	2012	0.84	2011	0.08
36	r12i1p1_EC–EARTH_RCP4.5_039.final.csv	[1861.0, 1883, 1915, 1940, 1977, 1997, 2012, 2019, 2034, 2048, 2064, 2077, 2100.0]	2	4	3	r12i1p1	EC–EARTH	RCP4.5	17	2019	2012	2034	100	16.076	0.268291	100	2019	0.9	2018	0.05
37	r12i1p1_EC–EARTH_RCP4.5_039.final.csv	[1861.0, 1883, 1915, 1940, 1977, 1997, 2012, 2019, 2034, 2048, 2064, 2077, 2100.0]	2	4	3	r12i1p1	EC–EARTH	RCP4.5	17	2034	2019	2048	17	21.7457	0.326626	100	2034	0.9	2035	0.09
38	r12i1p1_EC–EARTH_RCP4.5_039.final.csv	[1861.0, 1883, 1915, 1940, 1977, 1997, 2012, 2019, 2034, 2048, 2064, 2077, 2100.0]	2	4	3	r12i1p1	EC–EARTH	RCP4.5	17	2048	2034	2064	17	20.6826	0.348053	17	2048	0.52	2050	0.29
39	r12i1p1_EC–EARTH_RCP4.5_039.final.csv	[1861.0, 1883, 1915, 1940, 1977, 1997, 2012, 2019, 2034, 2048, 2064, 2077, 2100.0]	2	4	3	r12i1p1	EC–EARTH	RCP4.5	17	2064	2048	2077	17	15.8832	0.22511	17	2064	0.98	2063	0.02
40	r12i1p1_EC–EARTH_RCP4.5_039.final.csv	[1861.0, 1883, 1915, 1940, 1977, 1997, 2012, 2019, 2034, 2048, 2064, 2077, 2100.0]	2	4	3	r12i1p1	EC–EARTH	RCP4.5	17	2077	2064	2100	17	17.5315	0.195078	24	2077	0.88	2078	0.12
41	r12i1p1_EC–EARTH_RCP4.5_039.final.csv	[1861.0, 1883, 1915, 1940, 1977, 1997, 2012, 2019, 2034, 2050, 2071, 2100.0]	2	5	4	r12i1p1	EC–EARTH	RCP4.5	73	1883	1861	1915	100	19.2797	–0.136069701971	100	1883	1	0	0
42	r12i1p1_EC–EARTH_RCP4.5_039.final.csv	[1861.0, 1883, 1915, 1940, 1977, 1997, 2012, 2019, 2034, 2050, 2071, 2100.0]	2	5	4	r12i1p1	EC–EARTH	RCP4.5	73	1915	1883	1940	98	46.0114	0.37637	100	1915	1	0	0
43	r12i1p1_EC–EARTH_RCP4.5_039.final.csv	[1861.0, 1883, 1915, 1940, 1977, 1997, 2012, 2019, 2034, 2050, 2071, 2100.0]	2	5	4	r12i1p1	EC–EARTH	RCP4.5	73	1940	1915	1977	98	22.7332	0.180621	98	1921	0.5	1940	0.37
44	r12i1p1_EC–EARTH_RCP4.5_039.final.csv	[1861.0, 1883, 1915, 1940, 1977, 1997, 2012, 2019, 2034, 2050, 2071, 2100.0]	2	5	4	r12i1p1	EC–EARTH	RCP4.5	73	1977	1940	1997	98	44.6034	0.327469	100	1977	1	0	0
45	r12i1p1_EC–EARTH_RCP4.5_039.final.csv	[1861.0, 1883, 1915, 1940, 1977, 1997, 2012, 2019, 2034, 2050, 2071, 2100.0]	2	5	4	r12i1p1	EC–EARTH	RCP4.5	73	1997	1977	2012	100	27.7337	0.385139	100	1997	0.78	1999	0.15
46	r12i1p1_EC–EARTH_RCP4.5_039.final.csv	[1861.0, 1883, 1915, 1940, 1977, 1997, 2012, 2019, 2034, 2050, 2071, 2100.0]	2	5	4	r12i1p1	EC–EARTH	RCP4.5	73	2012	1997	2019	100	13.3217	0.229989	100	2012	0.84	2011	0.08
47	r12i1p1_EC–EARTH_RCP4.5_039.final.csv	[1861.0, 1883, 1915, 1940, 1977, 1997, 2012, 2019, 2034, 2050, 2071, 2100.0]	2	5	4	r12i1p1	EC–EARTH	RCP4.5	73	2019	2012	2034	100	16.076	0.268291	100	2019	0.9	2018	0.05
48	r12i1p1_EC–EARTH_RCP4.5_039.final.csv	[1861.0, 1883, 1915, 1940, 1977, 1997, 2012, 2019, 2034, 2050, 2071, 2100.0]	2	5	4	r12i1p1	EC–EARTH	RCP4.5	73	2034	2019	2050	75	23.1115	0.351308	100	2034	0.74	2035	0.22
49	r12i1p1_EC–EARTH_RCP4.5_039.final.csv	[1861.0, 1883, 1915, 1940, 1977, 1997, 2012, 2019, 2034, 2050, 2071, 2100.0]	2	5	4	r12i1p1	EC–EARTH	RCP4.5	73	2050	2034	2071	75	26.3638	0.402332	75	2050	0.97	2048	0.03
50	r12i1p1_EC–EARTH_RCP4.5_039.final.csv	[1861.0, 1883, 1915, 1940, 1977, 1997, 2012, 2019, 2034, 2050, 2071, 2100.0]	2	5	4	r12i1p1	EC–EARTH	RCP4.5	73	2071	2050	2100	75	30.7579	0.311746	75	2071	0.76	2073	0.17
51	r12i1p1_EC–EARTH_RCP4.5_039.final.csv	[1861.0, 1883, 1915, 1940, 1977, 1997, 2012, 2019, 2034, 2044, 2055, 2077, 2100.0]	2	6	5	r12i1p1	EC–EARTH	RCP4.5	1	1883	1861	1915	100	19.2797	–0.136069701971	100	1883	1	0	0
52	r12i1p1_EC–EARTH_RCP4.5_039.final.csv	[1861.0, 1883, 1915, 1940, 1977, 1997, 2012, 2019, 2034, 2044, 2055, 2077, 2100.0]	2	6	5	r12i1p1	EC–EARTH	RCP4.5	1	1915	1883	1940	98	46.0114	0.37637	100	1915	1	0	0
53	r12i1p1_EC–EARTH_RCP4.5_039.final.csv	[1861.0, 1883, 1915, 1940, 1977, 1997, 2012, 2019, 2034, 2044, 2055, 2077, 2100.0]	2	6	5	r12i1p1	EC–EARTH	RCP4.5	1	1940	1915	1977	98	22.7332	0.180621	98	1921	0.5	1940	0.37
54	r12i1p1_EC–EARTH_RCP4.5_039.final.csv	[1861.0, 1883, 1915, 1940, 1977, 1997, 2012, 2019, 2034, 2044, 2055, 2077, 2100.0]	2	6	5	r12i1p1	EC–EARTH	RCP4.5	1	1977	1940	1997	98	44.6034	0.327469	100	1977	1	0	0
55	r12i1p1_EC–EARTH_RCP4.5_039.final.csv	[1861.0, 1883, 1915, 1940, 1977, 1997, 2012, 2019, 2034, 2044, 2055, 2077, 2100.0]	2	6	5	r12i1p1	EC–EARTH	RCP4.5	1	1997	1977	2012	100	27.7337	0.385139	100	1997	0.78	1999	0.15
56	r12i1p1_EC–EARTH_RCP4.5_039.final.csv	[1861.0, 1883, 1915, 1940, 1977, 1997, 2012, 2019, 2034, 2044, 2055, 2077, 2100.0]	2	6	5	r12i1p1	EC–EARTH	RCP4.5	1	2012	1997	2019	100	13.3217	0.229989	100	2012	0.84	2011	0.08
57	r12i1p1_EC–EARTH_RCP4.5_039.final.csv	[1861.0, 1883, 1915, 1940, 1977, 1997, 2012, 2019, 2034, 2044, 2055, 2077, 2100.0]	2	6	5	r12i1p1	EC–EARTH	RCP4.5	1	2019	2012	2034	100	16.076	0.268291	100	2019	0.9	2018	0.05
58	r12i1p1_EC–EARTH_RCP4.5_039.final.csv	[1861.0, 1883, 1915, 1940, 1977, 1997, 2012, 2019, 2034, 2044, 2055, 2077, 2100.0]	2	6	5	r12i1p1	EC–EARTH	RCP4.5	1	2034	2019	2044	1	18.9269	0.274396	100	2034	1	0	0
59	r12i1p1_EC–EARTH_RCP4.5_039.final.csv	[1861.0, 1883, 1915, 1940, 1977, 1997, 2012, 2019, 2034, 2044, 2055, 2077, 2100.0]	2	6	5	r12i1p1	EC–EARTH	RCP4.5	1	2044	2034	2055	1	14.7467	0.272299	1	2044	0.84	2043	0.06
60	r12i1p1_EC–EARTH_RCP4.5_039.final.csv	[1861.0, 1883, 1915, 1940, 1977, 1997, 2012, 2019, 2034, 2044, 2055, 2077, 2100.0]	2	6	5	r12i1p1	EC–EARTH	RCP4.5	1	2055	2044	2077	1	19.3603	0.285967	8	2055	0.88	2054	0.06
61	r12i1p1_EC–EARTH_RCP4.5_039.final.csv	[1861.0, 1883, 1915, 1940, 1977, 1997, 2012, 2019, 2034, 2044, 2055, 2077, 2100.0]	2	6	5	r12i1p1	EC–EARTH	RCP4.5	1	2077	2055	2100	7	25.7062	0.26365	24	2077	0.53	2073	0.29
62	r12i1p1_EC–EARTH_RCP4.5_039.final.csv	[1861.0, 1883, 1915, 1940, 1977, 1997, 2012, 2019, 2034, 2043, 2055, 2077, 2100.0]	2	7	6	r12i1p1	EC–EARTH	RCP4.5	6	1883	1861	1915	100	19.2797	–0.136069701971	100	1883	1	0	0
63	r12i1p1_EC–EARTH_RCP4.5_039.final.csv	[1861.0, 1883, 1915, 1940, 1977, 1997, 2012, 2019, 2034, 2043, 2055, 2077, 2100.0]	2	7	6	r12i1p1	EC–EARTH	RCP4.5	6	1915	1883	1940	98	46.0114	0.37637	100	1915	1	0	0
64	r12i1p1_EC–EARTH_RCP4.5_039.final.csv	[1861.0, 1883, 1915, 1940, 1977, 1997, 2012, 2019, 2034, 2043, 2055, 2077, 2100.0]	2	7	6	r12i1p1	EC–EARTH	RCP4.5	6	1940	1915	1977	98	22.7332	0.180621	98	1921	0.5	1940	0.37
65	r12i1p1_EC–EARTH_RCP4.5_039.final.csv	[1861.0, 1883, 1915, 1940, 1977, 1997, 2012, 2019, 2034, 2043, 2055, 2077, 2100.0]	2	7	6	r12i1p1	EC–EARTH	RCP4.5	6	1977	1940	1997	98	44.6034	0.327469	100	1977	1	0	0
66	r12i1p1_EC–EARTH_RCP4.5_039.final.csv	[1861.0, 1883, 1915, 1940, 1977, 1997, 2012, 2019, 2034, 2043, 2055, 2077, 2100.0]	2	7	6	r12i1p1	EC–EARTH	RCP4.5	6	1997	1977	2012	100	27.7337	0.385139	100	1997	0.78	1999	0.15
67	r12i1p1_EC–EARTH_RCP4.5_039.final.csv	[1861.0, 1883, 1915, 1940, 1977, 1997, 2012, 2019, 2034, 2043, 2055, 2077, 2100.0]	2	7	6	r12i1p1	EC–EARTH	RCP4.5	6	2012	1997	2019	100	13.3217	0.229989	100	2012	0.84	2011	0.08
68	r12i1p1_EC–EARTH_RCP4.5_039.final.csv	[1861.0, 1883, 1915, 1940, 1977, 1997, 2012, 2019, 2034, 2043, 2055, 2077, 2100.0]	2	7	6	r12i1p1	EC–EARTH	RCP4.5	6	2019	2012	2034	100	16.076	0.268291	100	2019	0.9	2018	0.05
69	r12i1p1_EC–EARTH_RCP4.5_039.final.csv	[1861.0, 1883, 1915, 1940, 1977, 1997, 2012, 2019, 2034, 2043, 2055, 2077, 2100.0]	2	7	6	r12i1p1	EC–EARTH	RCP4.5	6	2034	2019	2043	7	17.9485	0.262851	100	2034	1	0	0
70	r12i1p1_EC–EARTH_RCP4.5_039.final.csv	[1861.0, 1883, 1915, 1940, 1977, 1997, 2012, 2019, 2034, 2043, 2055, 2077, 2100.0]	2	7	6	r12i1p1	EC–EARTH	RCP4.5	6	2043	2034	2055	7	14.7467	0.272299	7	2044	0.84	2043	0.06
71	r12i1p1_EC–EARTH_RCP4.5_039.final.csv	[1861.0, 1883, 1915, 1940, 1977, 1997, 2012, 2019, 2034, 2043, 2055, 2077, 2100.0]	2	7	6	r12i1p1	EC–EARTH	RCP4.5	6	2055	2043	2077	6	20.6538	0.300767	8	2055	0.84	2054	0.12
72	r12i1p1_EC–EARTH_RCP4.5_039.final.csv	[1861.0, 1883, 1915, 1940, 1977, 1997, 2012, 2019, 2034, 2043, 2055, 2077, 2100.0]	2	7	6	r12i1p1	EC–EARTH	RCP4.5	6	2077	2055	2100	7	25.7062	0.26365	24	2077	0.53	2073	0.29
Seq	Source	BreakSet	DatasetNo	SetNo	SetNoInData	Type	Model	Treat	%BreakSet	Year	Predecessor	Successor	%SegmentFound	Ti	Shift	%YearOverall	ModalYear	ModalValue	SecondModalYear	SecondModalValue
73	r1i1p1_ACCESS1–0_RCP4.5_000.final.csv	[1861.0, 1882, 1896, 1915, 1986, 1997, 2011, 2030, 2048, 2062, 2076, 2100.0]	3	8	1	r1i1p1	ACCESS1–0	RCP4.5	100	1882	1861	1896	100	26.2981	–0.277997657037	100	1882	1	0	0
74	r1i1p1_ACCESS1–0_RCP4.5_000.final.csv	[1861.0, 1882, 1896, 1915, 1986, 1997, 2011, 2030, 2048, 2062, 2076, 2100.0]	3	8	1	r1i1p1	ACCESS1–0	RCP4.5	100	1896	1882	1915	100	20.1513	0.227819	100	1896	0.99	1892	0.01
75	r1i1p1_ACCESS1–0_RCP4.5_000.final.csv	[1861.0, 1882, 1896, 1915, 1986, 1997, 2011, 2030, 2048, 2062, 2076, 2100.0]	3	8	1	r1i1p1	ACCESS1–0	RCP4.5	100	1915	1896	1986	100	27.1259	0.175123	100	1915	0.65	1916	0.33
76	r1i1p1_ACCESS1–0_RCP4.5_000.final.csv	[1861.0, 1882, 1896, 1915, 1986, 1997, 2011, 2030, 2048, 2062, 2076, 2100.0]	3	8	1	r1i1p1	ACCESS1–0	RCP4.5	100	1986	1915	1997	100	25.2129	0.223749	100	1986	0.84	1975	0.16
77	r1i1p1_ACCESS1–0_RCP4.5_000.final.csv	[1861.0, 1882, 1896, 1915, 1986, 1997, 2011, 2030, 2048, 2062, 2076, 2100.0]	3	8	1	r1i1p1	ACCESS1–0	RCP4.5	100	1997	1986	2011	100	18.4932	0.409436	100	1997	0.75	1998	0.25
78	r1i1p1_ACCESS1–0_RCP4.5_000.final.csv	[1861.0, 1882, 1896, 1915, 1986, 1997, 2011, 2030, 2048, 2062, 2076, 2100.0]	3	8	1	r1i1p1	ACCESS1–0	RCP4.5	100	2011	1997	2030	100	26.1703	0.456315	100	2011	0.97	2009	0.03
79	r1i1p1_ACCESS1–0_RCP4.5_000.final.csv	[1861.0, 1882, 1896, 1915, 1986, 1997, 2011, 2030, 2048, 2062, 2076, 2100.0]	3	8	1	r1i1p1	ACCESS1–0	RCP4.5	100	2030	2011	2048	100	28.5945	0.407835	100	2030	0.97	2031	0.03
80	r1i1p1_ACCESS1–0_RCP4.5_000.final.csv	[1861.0, 1882, 1896, 1915, 1986, 1997, 2011, 2030, 2048, 2062, 2076, 2100.0]	3	8	1	r1i1p1	ACCESS1–0	RCP4.5	100	2048	2030	2062	100	25.2644	0.434901	100	2048	0.99	2046	0.01
81	r1i1p1_ACCESS1–0_RCP4.5_000.final.csv	[1861.0, 1882, 1896, 1915, 1986, 1997, 2011, 2030, 2048, 2062, 2076, 2100.0]	3	8	1	r1i1p1	ACCESS1–0	RCP4.5	100	2062	2048	2076	100	20.0385	0.296917	100	2062	1	0	0
82	r1i1p1_ACCESS1–0_RCP4.5_000.final.csv	[1861.0, 1882, 1896, 1915, 1986, 1997, 2011, 2030, 2048, 2062, 2076, 2100.0]	3	8	1	r1i1p1	ACCESS1–0	RCP4.5	100	2076	2062	2100	100	29.8668	0.3455	100	2076	0.99	2077	0.01
Seq	Source	BreakSet	DatasetNo	SetNo	SetNoInData	Type	Model	Treat	%BreakSet	Year	Predecessor	Successor	%SegmentFound	Ti	Shift	%YearOverall	ModalYear	ModalValue	SecondModalYear	SecondModalValue
83	r1i1p1_ACCESS1–3_RCP4.5_001.final.csv	[1861.0, 1913, 1982, 1997, 2004, 2016, 2023, 2037, 2046, 2057, 2076, 2092, 2100.0]	4	9	1	r1i1p1	ACCESS1–3	RCP4.5	1	1913	1861	1982	100	38.3363	0.155158	100	1913	0.73	1918	0.17
84	r1i1p1_ACCESS1–3_RCP4.5_001.final.csv	[1861.0, 1913, 1982, 1997, 2004, 2016, 2023, 2037, 2046, 2057, 2076, 2092, 2100.0]	4	9	1	r1i1p1	ACCESS1–3	RCP4.5	1	1982	1913	1997	22	23.7267	0.155225	100	1982	0.87	1981	0.13
85	r1i1p1_ACCESS1–3_RCP4.5_001.final.csv	[1861.0, 1913, 1982, 1997, 2004, 2016, 2023, 2037, 2046, 2057, 2076, 2092, 2100.0]	4	9	1	r1i1p1	ACCESS1–3	RCP4.5	1	1997	1982	2004	15	13.7773	0.217367	22	1997	0.83	2000	0.13
86	r1i1p1_ACCESS1–3_RCP4.5_001.final.csv	[1861.0, 1913, 1982, 1997, 2004, 2016, 2023, 2037, 2046, 2057, 2076, 2092, 2100.0]	4	9	1	r1i1p1	ACCESS1–3	RCP4.5	1	2004	1997	2016	15	13.9621	0.365611	15	2004	0.74	2005	0.1
87	r1i1p1_ACCESS1–3_RCP4.5_001.final.csv	[1861.0, 1913, 1982, 1997, 2004, 2016, 2023, 2037, 2046, 2057, 2076, 2092, 2100.0]	4	9	1	r1i1p1	ACCESS1–3	RCP4.5	1	2016	2004	2023	15	10.9136	0.213887	49	2016	0.94	2007	0.03
88	r1i1p1_ACCESS1–3_RCP4.5_001.final.csv	[1861.0, 1913, 1982, 1997, 2004, 2016, 2023, 2037, 2046, 2057, 2076, 2092, 2100.0]	4	9	1	r1i1p1	ACCESS1–3	RCP4.5	1	2023	2016	2037	49	13.9235	0.24066	49	2023	0.81	2024	0.19
89	r1i1p1_ACCESS1–3_RCP4.5_001.final.csv	[1861.0, 1913, 1982, 1997, 2004, 2016, 2023, 2037, 2046, 2057, 2076, 2092, 2100.0]	4	9	1	r1i1p1	ACCESS1–3	RCP4.5	1	2037	2023	2046	2	15.9615	0.273504	49	2037	0.93	2036	0.03
90	r1i1p1_ACCESS1–3_RCP4.5_001.final.csv	[1861.0, 1913, 1982, 1997, 2004, 2016, 2023, 2037, 2046, 2057, 2076, 2092, 2100.0]	4	9	1	r1i1p1	ACCESS1–3	RCP4.5	1	2046	2037	2057	2	16.2087	0.33197	2	2045	0.6	2046	0.39
91	r1i1p1_ACCESS1–3_RCP4.5_001.final.csv	[1861.0, 1913, 1982, 1997, 2004, 2016, 2023, 2037, 2046, 2057, 2076, 2092, 2100.0]	4	9	1	r1i1p1	ACCESS1–3	RCP4.5	1	2057	2046	2076	2	21.6833	0.327379	100	2057	1	0	0
92	r1i1p1_ACCESS1–3_RCP4.5_001.final.csv	[1861.0, 1913, 1982, 1997, 2004, 2016, 2023, 2037, 2046, 2057, 2076, 2092, 2100.0]	4	9	1	r1i1p1	ACCESS1–3	RCP4.5	1	2076	2057	2092	100	20.8954	0.245384	100	2076	0.97	2077	0.03
93	r1i1p1_ACCESS1–3_RCP4.5_001.final.csv	[1861.0, 1913, 1982, 1997, 2004, 2016, 2023, 2037, 2046, 2057, 2076, 2092, 2100.0]	4	9	1	r1i1p1	ACCESS1–3	RCP4.5	1	2092	2076	2100	100	10.4293	0.145826	100	2092	1	0	0
94	r1i1p1_ACCESS1–3_RCP4.5_001.final.csv	[1861.0, 1913, 1982, 1997, 2004, 2016, 2023, 2037, 2045, 2057, 2076, 2092, 2100.0]	4	10	2	r1i1p1	ACCESS1–3	RCP4.5	14	1913	1861	1982	100	38.3363	0.155158	100	1913	0.73	1918	0.17
95	r1i1p1_ACCESS1–3_RCP4.5_001.final.csv	[1861.0, 1913, 1982, 1997, 2004, 2016, 2023, 2037, 2045, 2057, 2076, 2092, 2100.0]	4	10	2	r1i1p1	ACCESS1–3	RCP4.5	14	1982	1913	1997	22	23.7267	0.155225	100	1982	0.87	1981	0.13
96	r1i1p1_ACCESS1–3_RCP4.5_001.final.csv	[1861.0, 1913, 1982, 1997, 2004, 2016, 2023, 2037, 2045, 2057, 2076, 2092, 2100.0]	4	10	2	r1i1p1	ACCESS1–3	RCP4.5	14	1997	1982	2004	15	13.7773	0.217367	22	1997	0.83	2000	0.13
97	r1i1p1_ACCESS1–3_RCP4.5_001.final.csv	[1861.0, 1913, 1982, 1997, 2004, 2016, 2023, 2037, 2045, 2057, 2076, 2092, 2100.0]	4	10	2	r1i1p1	ACCESS1–3	RCP4.5	14	2004	1997	2016	15	13.9621	0.365611	15	2004	0.74	2005	0.1
98	r1i1p1_ACCESS1–3_RCP4.5_001.final.csv	[1861.0, 1913, 1982, 1997, 2004, 2016, 2023, 2037, 2045, 2057, 2076, 2092, 2100.0]	4	10	2	r1i1p1	ACCESS1–3	RCP4.5	14	2016	2004	2023	15	10.9136	0.213887	49	2016	0.94	2007	0.03
99	r1i1p1_ACCESS1–3_RCP4.5_001.final.csv	[1861.0, 1913, 1982, 1997, 2004, 2016, 2023, 2037, 2045, 2057, 2076, 2092, 2100.0]	4	10	2	r1i1p1	ACCESS1–3	RCP4.5	14	2023	2016	2037	49	13.9235	0.24066	49	2023	0.81	2024	0.19
100	r1i1p1_ACCESS1–3_RCP4.5_001.final.csv	[1861.0, 1913, 1982, 1997, 2004, 2016, 2023, 2037, 2045, 2057, 2076, 2092, 2100.0]	4	10	2	r1i1p1	ACCESS1–3	RCP4.5	14	2037	2023	2045	47	15.1881	0.254179	49	2037	0.87	2032	0.09
101	r1i1p1_ACCESS1–3_RCP4.5_001.final.csv	[1861.0, 1913, 1982, 1997, 2004, 2016, 2023, 2037, 2045, 2057, 2076, 2092, 2100.0]	4	10	2	r1i1p1	ACCESS1–3	RCP4.5	14	2045	2037	2057	47	16.2087	0.33197	98	2045	0.6	2046	0.39
102	r1i1p1_ACCESS1–3_RCP4.5_001.final.csv	[1861.0, 1913, 1982, 1997, 2004, 2016, 2023, 2037, 2045, 2057, 2076, 2092, 2100.0]	4	10	2	r1i1p1	ACCESS1–3	RCP4.5	14	2057	2045	2076	98	22.6599	0.340005	100	2057	1	0	0
103	r1i1p1_ACCESS1–3_RCP4.5_001.final.csv	[1861.0, 1913, 1982, 1997, 2004, 2016, 2023, 2037, 2045, 2057, 2076, 2092, 2100.0]	4	10	2	r1i1p1	ACCESS1–3	RCP4.5	14	2076	2057	2092	100	20.8954	0.245384	100	2076	0.97	2077	0.03
104	r1i1p1_ACCESS1–3_RCP4.5_001.final.csv	[1861.0, 1913, 1982, 1997, 2004, 2016, 2023, 2037, 2045, 2057, 2076, 2092, 2100.0]	4	10	2	r1i1p1	ACCESS1–3	RCP4.5	14	2092	2076	2100	100	10.4293	0.145826	100	2092	1	0	0
105	r1i1p1_ACCESS1–3_RCP4.5_001.final.csv	[1861.0, 1913, 1982, 2003, 2017, 2032, 2045, 2057, 2076, 2092, 2100.0]	4	11	3	r1i1p1	ACCESS1–3	RCP4.5	1	1913	1861	1982	100	38.3363	0.155158	100	1913	0.73	1918	0.17
106	r1i1p1_ACCESS1–3_RCP4.5_001.final.csv	[1861.0, 1913, 1982, 2003, 2017, 2032, 2045, 2057, 2076, 2092, 2100.0]	4	11	3	r1i1p1	ACCESS1–3	RCP4.5	1	1982	1913	2003	30	38.4595	0.210333	100	1982	0.94	1984	0.04
107	r1i1p1_ACCESS1–3_RCP4.5_001.final.csv	[1861.0, 1913, 1982, 2003, 2017, 2032, 2045, 2057, 2076, 2092, 2100.0]	4	11	3	r1i1p1	ACCESS1–3	RCP4.5	1	2003	1982	2017	1	28.4242	0.521396	30	2003	0.88	2001	0.05
108	r1i1p1_ACCESS1–3_RCP4.5_001.final.csv	[1861.0, 1913, 1982, 2003, 2017, 2032, 2045, 2057, 2076, 2092, 2100.0]	4	11	3	r1i1p1	ACCESS1–3	RCP4.5	1	2017	2003	2032	1	19.9687	0.342136	1	2016	0.51	2017	0.38
109	r1i1p1_ACCESS1–3_RCP4.5_001.final.csv	[1861.0, 1913, 1982, 2003, 2017, 2032, 2045, 2057, 2076, 2092, 2100.0]	4	11	3	r1i1p1	ACCESS1–3	RCP4.5	1	2032	2017	2045	1	19.1871	0.31567	51	2032	0.92	2033	0.03
110	r1i1p1_ACCESS1–3_RCP4.5_001.final.csv	[1861.0, 1913, 1982, 2003, 2017, 2032, 2045, 2057, 2076, 2092, 2100.0]	4	11	3	r1i1p1	ACCESS1–3	RCP4.5	1	2045	2032	2057	51	19.9646	0.392917	98	2045	0.91	2044	0.06
111	r1i1p1_ACCESS1–3_RCP4.5_001.final.csv	[1861.0, 1913, 1982, 2003, 2017, 2032, 2045, 2057, 2076, 2092, 2100.0]	4	11	3	r1i1p1	ACCESS1–3	RCP4.5	1	2057	2045	2076	98	22.6599	0.340005	100	2057	1	0	0
112	r1i1p1_ACCESS1–3_RCP4.5_001.final.csv	[1861.0, 1913, 1982, 2003, 2017, 2032, 2045, 2057, 2076, 2092, 2100.0]	4	11	3	r1i1p1	ACCESS1–3	RCP4.5	1	2076	2057	2092	100	20.8954	0.245384	100	2076	0.97	2077	0.03
113	r1i1p1_ACCESS1–3_RCP4.5_001.final.csv	[1861.0, 1913, 1982, 2003, 2017, 2032, 2045, 2057, 2076, 2092, 2100.0]	4	11	3	r1i1p1	ACCESS1–3	RCP4.5	1	2092	2076	2100	100	10.4293	0.145826	100	2092	1	0	0
114	r1i1p1_ACCESS1–3_RCP4.5_001.final.csv	[1861.0, 1913, 1982, 2000, 2007, 2016, 2023, 2037, 2045, 2057, 2076, 2092, 2100.0]	4	12	4	r1i1p1	ACCESS1–3	RCP4.5	5	1913	1861	1982	100	38.3363	0.155158	100	1913	0.73	1918	0.17
115	r1i1p1_ACCESS1–3_RCP4.5_001.final.csv	[1861.0, 1913, 1982, 2000, 2007, 2016, 2023, 2037, 2045, 2057, 2076, 2092, 2100.0]	4	12	4	r1i1p1	ACCESS1–3	RCP4.5	5	1982	1913	2000	48	31.0734	0.177195	100	1982	0.96	1981	0.04
116	r1i1p1_ACCESS1–3_RCP4.5_001.final.csv	[1861.0, 1913, 1982, 2000, 2007, 2016, 2023, 2037, 2045, 2057, 2076, 2092, 2100.0]	4	12	4	r1i1p1	ACCESS1–3	RCP4.5	5	2000	1982	2007	48	18.2086	0.327211	48	2000	0.57	2001	0.43
117	r1i1p1_ACCESS1–3_RCP4.5_001.final.csv	[1861.0, 1913, 1982, 2000, 2007, 2016, 2023, 2037, 2045, 2057, 2076, 2092, 2100.0]	4	12	4	r1i1p1	ACCESS1–3	RCP4.5	5	2007	2000	2016	5	11.4899	0.279706	55	2007	0.94	2005	0.03
118	r1i1p1_ACCESS1–3_RCP4.5_001.final.csv	[1861.0, 1913, 1982, 2000, 2007, 2016, 2023, 2037, 2045, 2057, 2076, 2092, 2100.0]	4	12	4	r1i1p1	ACCESS1–3	RCP4.5	5	2016	2007	2023	5	10.0861	0.168223	49	2016	0.98	2017	0.02
119	r1i1p1_ACCESS1–3_RCP4.5_001.final.csv	[1861.0, 1913, 1982, 2000, 2007, 2016, 2023, 2037, 2045, 2057, 2076, 2092, 2100.0]	4	12	4	r1i1p1	ACCESS1–3	RCP4.5	5	2023	2016	2037	49	13.9235	0.24066	49	2023	0.81	2024	0.19
120	r1i1p1_ACCESS1–3_RCP4.5_001.final.csv	[1861.0, 1913, 1982, 2000, 2007, 2016, 2023, 2037, 2045, 2057, 2076, 2092, 2100.0]	4	12	4	r1i1p1	ACCESS1–3	RCP4.5	5	2037	2023	2045	47	15.1881	0.254179	49	2037	0.87	2032	0.09
121	r1i1p1_ACCESS1–3_RCP4.5_001.final.csv	[1861.0, 1913, 1982, 2000, 2007, 2016, 2023, 2037, 2045, 2057, 2076, 2092, 2100.0]	4	12	4	r1i1p1	ACCESS1–3	RCP4.5	5	2045	2037	2057	47	16.2087	0.33197	98	2045	0.6	2046	0.39
122	r1i1p1_ACCESS1–3_RCP4.5_001.final.csv	[1861.0, 1913, 1982, 2000, 2007, 2016, 2023, 2037, 2045, 2057, 2076, 2092, 2100.0]	4	12	4	r1i1p1	ACCESS1–3	RCP4.5	5	2057	2045	2076	98	22.6599	0.340005	100	2057	1	0	0
123	r1i1p1_ACCESS1–3_RCP4.5_001.final.csv	[1861.0, 1913, 1982, 2000, 2007, 2016, 2023, 2037, 2045, 2057, 2076, 2092, 2100.0]	4	12	4	r1i1p1	ACCESS1–3	RCP4.5	5	2076	2057	2092	100	20.8954	0.245384	100	2076	0.97	2077	0.03
124	r1i1p1_ACCESS1–3_RCP4.5_001.final.csv	[1861.0, 1913, 1982, 2000, 2007, 2016, 2023, 2037, 2045, 2057, 2076, 2092, 2100.0]	4	12	4	r1i1p1	ACCESS1–3	RCP4.5	5	2092	2076	2100	100	10.4293	0.145826	100	2092	1	0	0
125	r1i1p1_ACCESS1–3_RCP4.5_001.final.csv	[1861.0, 1913, 1982, 2003, 2016, 2023, 2037, 2045, 2057, 2076, 2092, 2100.0]	4	13	5	r1i1p1	ACCESS1–3	RCP4.5	28	1913	1861	1982	100	38.3363	0.155158	100	1913	0.73	1918	0.17
126	r1i1p1_ACCESS1–3_RCP4.5_001.final.csv	[1861.0, 1913, 1982, 2003, 2016, 2023, 2037, 2045, 2057, 2076, 2092, 2100.0]	4	13	5	r1i1p1	ACCESS1–3	RCP4.5	28	1982	1913	2003	30	38.4595	0.210333	100	1982	0.94	1984	0.04
127	r1i1p1_ACCESS1–3_RCP4.5_001.final.csv	[1861.0, 1913, 1982, 2003, 2016, 2023, 2037, 2045, 2057, 2076, 2092, 2100.0]	4	13	5	r1i1p1	ACCESS1–3	RCP4.5	28	2003	1982	2016	29	27.5125	0.508461	30	2003	0.84	2001	0.1
128	r1i1p1_ACCESS1–3_RCP4.5_001.final.csv	[1861.0, 1913, 1982, 2003, 2016, 2023, 2037, 2045, 2057, 2076, 2092, 2100.0]	4	13	5	r1i1p1	ACCESS1–3	RCP4.5	28	2016	2003	2023	29	11.5826	0.283658	49	2007	0.71	2016	0.26
129	r1i1p1_ACCESS1–3_RCP4.5_001.final.csv	[1861.0, 1913, 1982, 2003, 2016, 2023, 2037, 2045, 2057, 2076, 2092, 2100.0]	4	13	5	r1i1p1	ACCESS1–3	RCP4.5	28	2023	2016	2037	49	13.9235	0.24066	49	2023	0.81	2024	0.19
130	r1i1p1_ACCESS1–3_RCP4.5_001.final.csv	[1861.0, 1913, 1982, 2003, 2016, 2023, 2037, 2045, 2057, 2076, 2092, 2100.0]	4	13	5	r1i1p1	ACCESS1–3	RCP4.5	28	2037	2023	2045	47	15.1881	0.254179	49	2037	0.87	2032	0.09
131	r1i1p1_ACCESS1–3_RCP4.5_001.final.csv	[1861.0, 1913, 1982, 2003, 2016, 2023, 2037, 2045, 2057, 2076, 2092, 2100.0]	4	13	5	r1i1p1	ACCESS1–3	RCP4.5	28	2045	2037	2057	47	16.2087	0.33197	98	2045	0.6	2046	0.39
132	r1i1p1_ACCESS1–3_RCP4.5_001.final.csv	[1861.0, 1913, 1982, 2003, 2016, 2023, 2037, 2045, 2057, 2076, 2092, 2100.0]	4	13	5	r1i1p1	ACCESS1–3	RCP4.5	28	2057	2045	2076	98	22.6599	0.340005	100	2057	1	0	0
133	r1i1p1_ACCESS1–3_RCP4.5_001.final.csv	[1861.0, 1913, 1982, 2003, 2016, 2023, 2037, 2045, 2057, 2076, 2092, 2100.0]	4	13	5	r1i1p1	ACCESS1–3	RCP4.5	28	2076	2057	2092	100	20.8954	0.245384	100	2076	0.97	2077	0.03
134	r1i1p1_ACCESS1–3_RCP4.5_001.final.csv	[1861.0, 1913, 1982, 2003, 2016, 2023, 2037, 2045, 2057, 2076, 2092, 2100.0]	4	13	5	r1i1p1	ACCESS1–3	RCP4.5	28	2092	2076	2100	100	10.4293	0.145826	100	2092	1	0	0
135	r1i1p1_ACCESS1–3_RCP4.5_001.final.csv	[1861.0, 1913, 1982, 2000, 2007, 2021, 2032, 2045, 2057, 2076, 2092, 2100.0]	4	14	6	r1i1p1	ACCESS1–3	RCP4.5	43	1913	1861	1982	100	38.3363	0.155158	100	1913	0.73	1918	0.17
136	r1i1p1_ACCESS1–3_RCP4.5_001.final.csv	[1861.0, 1913, 1982, 2000, 2007, 2021, 2032, 2045, 2057, 2076, 2092, 2100.0]	4	14	6	r1i1p1	ACCESS1–3	RCP4.5	43	1982	1913	2000	48	31.0734	0.177195	100	1982	0.96	1981	0.04
137	r1i1p1_ACCESS1–3_RCP4.5_001.final.csv	[1861.0, 1913, 1982, 2000, 2007, 2021, 2032, 2045, 2057, 2076, 2092, 2100.0]	4	14	6	r1i1p1	ACCESS1–3	RCP4.5	43	2000	1982	2007	48	18.2086	0.327211	48	2000	0.57	2001	0.43
138	r1i1p1_ACCESS1–3_RCP4.5_001.final.csv	[1861.0, 1913, 1982, 2000, 2007, 2021, 2032, 2045, 2057, 2076, 2092, 2100.0]	4	14	6	r1i1p1	ACCESS1–3	RCP4.5	43	2007	2000	2021	43	14.9671	0.332953	55	2007	0.98	2004	0.01
139	r1i1p1_ACCESS1–3_RCP4.5_001.final.csv	[1861.0, 1913, 1982, 2000, 2007, 2021, 2032, 2045, 2057, 2076, 2092, 2100.0]	4	14	6	r1i1p1	ACCESS1–3	RCP4.5	43	2021	2007	2032	50	18.1389	0.282786	50	2021	0.7	2020	0.22
140	r1i1p1_ACCESS1–3_RCP4.5_001.final.csv	[1861.0, 1913, 1982, 2000, 2007, 2021, 2032, 2045, 2057, 2076, 2092, 2100.0]	4	14	6	r1i1p1	ACCESS1–3	RCP4.5	43	2032	2021	2045	50	16.282	0.266607	51	2032	0.84	2037	0.08
141	r1i1p1_ACCESS1–3_RCP4.5_001.final.csv	[1861.0, 1913, 1982, 2000, 2007, 2021, 2032, 2045, 2057, 2076, 2092, 2100.0]	4	14	6	r1i1p1	ACCESS1–3	RCP4.5	43	2045	2032	2057	51	19.9646	0.392917	98	2045	0.91	2044	0.06
142	r1i1p1_ACCESS1–3_RCP4.5_001.final.csv	[1861.0, 1913, 1982, 2000, 2007, 2021, 2032, 2045, 2057, 2076, 2092, 2100.0]	4	14	6	r1i1p1	ACCESS1–3	RCP4.5	43	2057	2045	2076	98	22.6599	0.340005	100	2057	1	0	0
143	r1i1p1_ACCESS1–3_RCP4.5_001.final.csv	[1861.0, 1913, 1982, 2000, 2007, 2021, 2032, 2045, 2057, 2076, 2092, 2100.0]	4	14	6	r1i1p1	ACCESS1–3	RCP4.5	43	2076	2057	2092	100	20.8954	0.245384	100	2076	0.97	2077	0.03
144	r1i1p1_ACCESS1–3_RCP4.5_001.final.csv	[1861.0, 1913, 1982, 2000, 2007, 2021, 2032, 2045, 2057, 2076, 2092, 2100.0]	4	14	6	r1i1p1	ACCESS1–3	RCP4.5	43	2092	2076	2100	100	10.4293	0.145826	100	2092	1	0	0
145	r1i1p1_ACCESS1–3_RCP4.5_001.final.csv	[1861.0, 1913, 1982, 2003, 2016, 2023, 2037, 2046, 2057, 2076, 2092, 2100.0]	4	15	7	r1i1p1	ACCESS1–3	RCP4.5	1	1913	1861	1982	100	38.3363	0.155158	100	1913	0.73	1918	0.17
146	r1i1p1_ACCESS1–3_RCP4.5_001.final.csv	[1861.0, 1913, 1982, 2003, 2016, 2023, 2037, 2046, 2057, 2076, 2092, 2100.0]	4	15	7	r1i1p1	ACCESS1–3	RCP4.5	1	1982	1913	2003	30	38.4595	0.210333	100	1982	0.94	1984	0.04
147	r1i1p1_ACCESS1–3_RCP4.5_001.final.csv	[1861.0, 1913, 1982, 2003, 2016, 2023, 2037, 2046, 2057, 2076, 2092, 2100.0]	4	15	7	r1i1p1	ACCESS1–3	RCP4.5	1	2003	1982	2016	29	27.5125	0.508461	30	2003	0.84	2001	0.1
148	r1i1p1_ACCESS1–3_RCP4.5_001.final.csv	[1861.0, 1913, 1982, 2003, 2016, 2023, 2037, 2046, 2057, 2076, 2092, 2100.0]	4	15	7	r1i1p1	ACCESS1–3	RCP4.5	1	2016	2003	2023	29	11.5826	0.283658	49	2007	0.71	2016	0.26
149	r1i1p1_ACCESS1–3_RCP4.5_001.final.csv	[1861.0, 1913, 1982, 2003, 2016, 2023, 2037, 2046, 2057, 2076, 2092, 2100.0]	4	15	7	r1i1p1	ACCESS1–3	RCP4.5	1	2023	2016	2037	49	13.9235	0.24066	49	2023	0.81	2024	0.19
150	r1i1p1_ACCESS1–3_RCP4.5_001.final.csv	[1861.0, 1913, 1982, 2003, 2016, 2023, 2037, 2046, 2057, 2076, 2092, 2100.0]	4	15	7	r1i1p1	ACCESS1–3	RCP4.5	1	2037	2023	2046	2	15.9615	0.273504	49	2037	0.93	2036	0.03
151	r1i1p1_ACCESS1–3_RCP4.5_001.final.csv	[1861.0, 1913, 1982, 2003, 2016, 2023, 2037, 2046, 2057, 2076, 2092, 2100.0]	4	15	7	r1i1p1	ACCESS1–3	RCP4.5	1	2046	2037	2057	2	16.2087	0.33197	2	2045	0.6	2046	0.39
152	r1i1p1_ACCESS1–3_RCP4.5_001.final.csv	[1861.0, 1913, 1982, 2003, 2016, 2023, 2037, 2046, 2057, 2076, 2092, 2100.0]	4	15	7	r1i1p1	ACCESS1–3	RCP4.5	1	2057	2046	2076	2	21.6833	0.327379	100	2057	1	0	0
153	r1i1p1_ACCESS1–3_RCP4.5_001.final.csv	[1861.0, 1913, 1982, 2003, 2016, 2023, 2037, 2046, 2057, 2076, 2092, 2100.0]	4	15	7	r1i1p1	ACCESS1–3	RCP4.5	1	2076	2057	2092	100	20.8954	0.245384	100	2076	0.97	2077	0.03
154	r1i1p1_ACCESS1–3_RCP4.5_001.final.csv	[1861.0, 1913, 1982, 2003, 2016, 2023, 2037, 2046, 2057, 2076, 2092, 2100.0]	4	15	7	r1i1p1	ACCESS1–3	RCP4.5	1	2092	2076	2100	100	10.4293	0.145826	100	2092	1	0	0
155	r1i1p1_ACCESS1–3_RCP4.5_001.final.csv	[1861.0, 1913, 1982, 1997, 2007, 2021, 2032, 2045, 2057, 2076, 2092, 2100.0]	4	16	8	r1i1p1	ACCESS1–3	RCP4.5	7	1913	1861	1982	100	38.3363	0.155158	100	1913	0.73	1918	0.17
156	r1i1p1_ACCESS1–3_RCP4.5_001.final.csv	[1861.0, 1913, 1982, 1997, 2007, 2021, 2032, 2045, 2057, 2076, 2092, 2100.0]	4	16	8	r1i1p1	ACCESS1–3	RCP4.5	7	1982	1913	1997	22	23.7267	0.155225	100	1982	0.87	1981	0.13
157	r1i1p1_ACCESS1–3_RCP4.5_001.final.csv	[1861.0, 1913, 1982, 1997, 2007, 2021, 2032, 2045, 2057, 2076, 2092, 2100.0]	4	16	8	r1i1p1	ACCESS1–3	RCP4.5	7	1997	1982	2007	7	18.2086	0.327211	22	2000	0.57	2001	0.43
158	r1i1p1_ACCESS1–3_RCP4.5_001.final.csv	[1861.0, 1913, 1982, 1997, 2007, 2021, 2032, 2045, 2057, 2076, 2092, 2100.0]	4	16	8	r1i1p1	ACCESS1–3	RCP4.5	7	2007	1997	2021	7	17.6861	0.397729	55	2007	0.88	2005	0.04
159	r1i1p1_ACCESS1–3_RCP4.5_001.final.csv	[1861.0, 1913, 1982, 1997, 2007, 2021, 2032, 2045, 2057, 2076, 2092, 2100.0]	4	16	8	r1i1p1	ACCESS1–3	RCP4.5	7	2021	2007	2032	50	18.1389	0.282786	50	2021	0.7	2020	0.22
160	r1i1p1_ACCESS1–3_RCP4.5_001.final.csv	[1861.0, 1913, 1982, 1997, 2007, 2021, 2032, 2045, 2057, 2076, 2092, 2100.0]	4	16	8	r1i1p1	ACCESS1–3	RCP4.5	7	2032	2021	2045	50	16.282	0.266607	51	2032	0.84	2037	0.08
161	r1i1p1_ACCESS1–3_RCP4.5_001.final.csv	[1861.0, 1913, 1982, 1997, 2007, 2021, 2032, 2045, 2057, 2076, 2092, 2100.0]	4	16	8	r1i1p1	ACCESS1–3	RCP4.5	7	2045	2032	2057	51	19.9646	0.392917	98	2045	0.91	2044	0.06
162	r1i1p1_ACCESS1–3_RCP4.5_001.final.csv	[1861.0, 1913, 1982, 1997, 2007, 2021, 2032, 2045, 2057, 2076, 2092, 2100.0]	4	16	8	r1i1p1	ACCESS1–3	RCP4.5	7	2057	2045	2076	98	22.6599	0.340005	100	2057	1	0	0
163	r1i1p1_ACCESS1–3_RCP4.5_001.final.csv	[1861.0, 1913, 1982, 1997, 2007, 2021, 2032, 2045, 2057, 2076, 2092, 2100.0]	4	16	8	r1i1p1	ACCESS1–3	RCP4.5	7	2076	2057	2092	100	20.8954	0.245384	100	2076	0.97	2077	0.03
164	r1i1p1_ACCESS1–3_RCP4.5_001.final.csv	[1861.0, 1913, 1982, 1997, 2007, 2021, 2032, 2045, 2057, 2076, 2092, 2100.0]	4	16	8	r1i1p1	ACCESS1–3	RCP4.5	7	2092	2076	2100	100	10.4293	0.145826	100	2092	1	0	0
Seq	Source	BreakSet	DatasetNo	SetNo	SetNoInData	Type	Model	Treat	%BreakSet	Year	Predecessor	Successor	%SegmentFound	Ti	Shift	%YearOverall	ModalYear	ModalValue	SecondModalYear	SecondModalValue
165	r1i1p1_bcc–csm1–1_RCP4.5_002.final.csv	[1861.0, 1919, 1973, 1985, 1995, 2006, 2020, 2037, 2053, 2074, 2100.0]	5	17	1	r1i1p1	bcc–csm1–1	RCP4.5	12	1919	1861	1973	100	57.1815	0.243806	100	1919	1	0	0
166	r1i1p1_bcc–csm1–1_RCP4.5_002.final.csv	[1861.0, 1919, 1973, 1985, 1995, 2006, 2020, 2037, 2053, 2074, 2100.0]	5	17	1	r1i1p1	bcc–csm1–1	RCP4.5	12	1973	1919	1985	100	36.1292	0.23458	100	1973	1	0	0
167	r1i1p1_bcc–csm1–1_RCP4.5_002.final.csv	[1861.0, 1919, 1973, 1985, 1995, 2006, 2020, 2037, 2053, 2074, 2100.0]	5	17	1	r1i1p1	bcc–csm1–1	RCP4.5	12	1985	1973	1995	100	16.107	0.355956	100	1985	0.99	1983	0.01
168	r1i1p1_bcc–csm1–1_RCP4.5_002.final.csv	[1861.0, 1919, 1973, 1985, 1995, 2006, 2020, 2037, 2053, 2074, 2100.0]	5	17	1	r1i1p1	bcc–csm1–1	RCP4.5	12	1995	1985	2006	100	13.7033	0.260862	100	1995	0.89	1996	0.11
169	r1i1p1_bcc–csm1–1_RCP4.5_002.final.csv	[1861.0, 1919, 1973, 1985, 1995, 2006, 2020, 2037, 2053, 2074, 2100.0]	5	17	1	r1i1p1	bcc–csm1–1	RCP4.5	12	2006	1995	2020	100	17.3185	0.2299	100	2006	1	0	0
170	r1i1p1_bcc–csm1–1_RCP4.5_002.final.csv	[1861.0, 1919, 1973, 1985, 1995, 2006, 2020, 2037, 2053, 2074, 2100.0]	5	17	1	r1i1p1	bcc–csm1–1	RCP4.5	12	2020	2006	2037	12	23.722	0.388433	100	2020	0.79	2021	0.13
171	r1i1p1_bcc–csm1–1_RCP4.5_002.final.csv	[1861.0, 1919, 1973, 1985, 1995, 2006, 2020, 2037, 2053, 2074, 2100.0]	5	17	1	r1i1p1	bcc–csm1–1	RCP4.5	12	2037	2020	2053	12	24.1163	0.333888	12	2035	0.4	2037	0.38
172	r1i1p1_bcc–csm1–1_RCP4.5_002.final.csv	[1861.0, 1919, 1973, 1985, 1995, 2006, 2020, 2037, 2053, 2074, 2100.0]	5	17	1	r1i1p1	bcc–csm1–1	RCP4.5	12	2053	2037	2074	12	27.2486	0.237008	100	2053	0.79	2054	0.21
173	r1i1p1_bcc–csm1–1_RCP4.5_002.final.csv	[1861.0, 1919, 1973, 1985, 1995, 2006, 2020, 2037, 2053, 2074, 2100.0]	5	17	1	r1i1p1	bcc–csm1–1	RCP4.5	12	2074	2053	2100	100	30.749	0.229498	100	2074	1	0	0
174	r1i1p1_bcc–csm1–1_RCP4.5_002.final.csv	[1861.0, 1919, 1973, 1985, 1995, 2006, 2020, 2035, 2053, 2074, 2100.0]	5	18	2	r1i1p1	bcc–csm1–1	RCP4.5	88	1919	1861	1973	100	57.1815	0.243806	100	1919	1	0	0
175	r1i1p1_bcc–csm1–1_RCP4.5_002.final.csv	[1861.0, 1919, 1973, 1985, 1995, 2006, 2020, 2035, 2053, 2074, 2100.0]	5	18	2	r1i1p1	bcc–csm1–1	RCP4.5	88	1973	1919	1985	100	36.1292	0.23458	100	1973	1	0	0
176	r1i1p1_bcc–csm1–1_RCP4.5_002.final.csv	[1861.0, 1919, 1973, 1985, 1995, 2006, 2020, 2035, 2053, 2074, 2100.0]	5	18	2	r1i1p1	bcc–csm1–1	RCP4.5	88	1985	1973	1995	100	16.107	0.355956	100	1985	0.99	1983	0.01
177	r1i1p1_bcc–csm1–1_RCP4.5_002.final.csv	[1861.0, 1919, 1973, 1985, 1995, 2006, 2020, 2035, 2053, 2074, 2100.0]	5	18	2	r1i1p1	bcc–csm1–1	RCP4.5	88	1995	1985	2006	100	13.7033	0.260862	100	1995	0.89	1996	0.11
178	r1i1p1_bcc–csm1–1_RCP4.5_002.final.csv	[1861.0, 1919, 1973, 1985, 1995, 2006, 2020, 2035, 2053, 2074, 2100.0]	5	18	2	r1i1p1	bcc–csm1–1	RCP4.5	88	2006	1995	2020	100	17.3185	0.2299	100	2006	1	0	0
179	r1i1p1_bcc–csm1–1_RCP4.5_002.final.csv	[1861.0, 1919, 1973, 1985, 1995, 2006, 2020, 2035, 2053, 2074, 2100.0]	5	18	2	r1i1p1	bcc–csm1–1	RCP4.5	88	2020	2006	2035	88	22.2643	0.367182	100	2020	0.92	2021	0.05
180	r1i1p1_bcc–csm1–1_RCP4.5_002.final.csv	[1861.0, 1919, 1973, 1985, 1995, 2006, 2020, 2035, 2053, 2074, 2100.0]	5	18	2	r1i1p1	bcc–csm1–1	RCP4.5	88	2035	2020	2053	88	24.1163	0.333888	88	2035	0.4	2037	0.38
181	r1i1p1_bcc–csm1–1_RCP4.5_002.final.csv	[1861.0, 1919, 1973, 1985, 1995, 2006, 2020, 2035, 2053, 2074, 2100.0]	5	18	2	r1i1p1	bcc–csm1–1	RCP4.5	88	2053	2035	2074	88	28.2339	0.256171	100	2053	0.92	2054	0.08
182	r1i1p1_bcc–csm1–1_RCP4.5_002.final.csv	[1861.0, 1919, 1973, 1985, 1995, 2006, 2020, 2035, 2053, 2074, 2100.0]	5	18	2	r1i1p1	bcc–csm1–1	RCP4.5	88	2074	2053	2100	100	30.749	0.229498	100	2074	1	0	0
Seq	Source	BreakSet	DatasetNo	SetNo	SetNoInData	Type	Model	Treat	%BreakSet	Year	Predecessor	Successor	%SegmentFound	Ti	Shift	%YearOverall	ModalYear	ModalValue	SecondModalYear	SecondModalValue
183	r1i1p1_bcc–csm1–1–m_RCP4.5_003.final.csv	[1861.0, 1906, 1944, 1968, 1985, 1997, 2015, 2031, 2059, 2076, 2100.0]	6	19	1	r1i1p1	bcc–csm1–1–m	RCP4.5	100	1906	1861	1944	100	36.1389	0.221782	100	1906	0.86	1905	0.1
184	r1i1p1_bcc–csm1–1–m_RCP4.5_003.final.csv	[1861.0, 1906, 1944, 1968, 1985, 1997, 2015, 2031, 2059, 2076, 2100.0]	6	19	1	r1i1p1	bcc–csm1–1–m	RCP4.5	100	1944	1906	1968	100	14.9973	0.0896483	100	1944	0.99	1950	0.01
185	r1i1p1_bcc–csm1–1–m_RCP4.5_003.final.csv	[1861.0, 1906, 1944, 1968, 1985, 1997, 2015, 2031, 2059, 2076, 2100.0]	6	19	1	r1i1p1	bcc–csm1–1–m	RCP4.5	100	1968	1944	1985	100	22.5165	0.18085	100	1968	0.85	1971	0.09
186	r1i1p1_bcc–csm1–1–m_RCP4.5_003.final.csv	[1861.0, 1906, 1944, 1968, 1985, 1997, 2015, 2031, 2059, 2076, 2100.0]	6	19	1	r1i1p1	bcc–csm1–1–m	RCP4.5	100	1985	1968	1997	100	14.5892	0.249166	100	1985	0.83	1986	0.16
187	r1i1p1_bcc–csm1–1–m_RCP4.5_003.final.csv	[1861.0, 1906, 1944, 1968, 1985, 1997, 2015, 2031, 2059, 2076, 2100.0]	6	19	1	r1i1p1	bcc–csm1–1–m	RCP4.5	100	1997	1985	2015	100	22.9593	0.562456	100	1997	0.96	2000	0.02
188	r1i1p1_bcc–csm1–1–m_RCP4.5_003.final.csv	[1861.0, 1906, 1944, 1968, 1985, 1997, 2015, 2031, 2059, 2076, 2100.0]	6	19	1	r1i1p1	bcc–csm1–1–m	RCP4.5	100	2015	1997	2031	100	25.2336	0.413564	100	2015	0.62	2014	0.21
189	r1i1p1_bcc–csm1–1–m_RCP4.5_003.final.csv	[1861.0, 1906, 1944, 1968, 1985, 1997, 2015, 2031, 2059, 2076, 2100.0]	6	19	1	r1i1p1	bcc–csm1–1–m	RCP4.5	100	2031	2015	2059	100	35.3607	0.334685	100	2031	1	0	0
190	r1i1p1_bcc–csm1–1–m_RCP4.5_003.final.csv	[1861.0, 1906, 1944, 1968, 1985, 1997, 2015, 2031, 2059, 2076, 2100.0]	6	19	1	r1i1p1	bcc–csm1–1–m	RCP4.5	100	2059	2031	2076	100	31.5948	0.229779	100	2059	0.94	2057	0.04
191	r1i1p1_bcc–csm1–1–m_RCP4.5_003.final.csv	[1861.0, 1906, 1944, 1968, 1985, 1997, 2015, 2031, 2059, 2076, 2100.0]	6	19	1	r1i1p1	bcc–csm1–1–m	RCP4.5	100	2076	2059	2100	100	16.4425	0.142207	100	2076	1	0	0
Seq	Source	BreakSet	DatasetNo	SetNo	SetNoInData	Type	Model	Treat	%BreakSet	Year	Predecessor	Successor	%SegmentFound	Ti	Shift	%YearOverall	ModalYear	ModalValue	SecondModalYear	SecondModalValue
192	r1i1p1_BNU–ESM_RCP4.5_004.final.csv	[1861.0, 1883, 1913, 1942, 1977, 1994, 2005, 2021, 2044, 2057, 2077, 2100.0]	7	20	1	r1i1p1	BNU–ESM	RCP4.5	100	1883	1861	1913	100	14.7852	–0.193588937517	100	1883	0.95	1882	0.05
193	r1i1p1_BNU–ESM_RCP4.5_004.final.csv	[1861.0, 1883, 1913, 1942, 1977, 1994, 2005, 2021, 2044, 2057, 2077, 2100.0]	7	20	1	r1i1p1	BNU–ESM	RCP4.5	100	1913	1883	1942	100	33.5836	0.321991	100	1913	0.98	1912	0.02
194	r1i1p1_BNU–ESM_RCP4.5_004.final.csv	[1861.0, 1883, 1913, 1942, 1977, 1994, 2005, 2021, 2044, 2057, 2077, 2100.0]	7	20	1	r1i1p1	BNU–ESM	RCP4.5	100	1942	1913	1977	100	31.0991	0.239147	100	1942	0.88	1941	0.06
195	r1i1p1_BNU–ESM_RCP4.5_004.final.csv	[1861.0, 1883, 1913, 1942, 1977, 1994, 2005, 2021, 2044, 2057, 2077, 2100.0]	7	20	1	r1i1p1	BNU–ESM	RCP4.5	100	1977	1942	1994	100	30.9092	0.333063	100	1977	0.99	1979	0.01
196	r1i1p1_BNU–ESM_RCP4.5_004.final.csv	[1861.0, 1883, 1913, 1942, 1977, 1994, 2005, 2021, 2044, 2057, 2077, 2100.0]	7	20	1	r1i1p1	BNU–ESM	RCP4.5	100	1994	1977	2005	100	21.0506	0.484899	100	1994	0.98	1995	0.02
197	r1i1p1_BNU–ESM_RCP4.5_004.final.csv	[1861.0, 1883, 1913, 1942, 1977, 1994, 2005, 2021, 2044, 2057, 2077, 2100.0]	7	20	1	r1i1p1	BNU–ESM	RCP4.5	100	2005	1994	2021	100	17.4953	0.433151	100	2005	1	0	0
198	r1i1p1_BNU–ESM_RCP4.5_004.final.csv	[1861.0, 1883, 1913, 1942, 1977, 1994, 2005, 2021, 2044, 2057, 2077, 2100.0]	7	20	1	r1i1p1	BNU–ESM	RCP4.5	100	2021	2005	2044	100	28.1006	0.555658	100	2021	0.85	2025	0.11
199	r1i1p1_BNU–ESM_RCP4.5_004.final.csv	[1861.0, 1883, 1913, 1942, 1977, 1994, 2005, 2021, 2044, 2057, 2077, 2100.0]	7	20	1	r1i1p1	BNU–ESM	RCP4.5	100	2044	2021	2057	100	23.3603	0.446971	100	2044	0.91	2043	0.09
200	r1i1p1_BNU–ESM_RCP4.5_004.final.csv	[1861.0, 1883, 1913, 1942, 1977, 1994, 2005, 2021, 2044, 2057, 2077, 2100.0]	7	20	1	r1i1p1	BNU–ESM	RCP4.5	100	2057	2044	2077	100	22.6511	0.382043	100	2057	0.93	2058	0.07
201	r1i1p1_BNU–ESM_RCP4.5_004.final.csv	[1861.0, 1883, 1913, 1942, 1977, 1994, 2005, 2021, 2044, 2057, 2077, 2100.0]	7	20	1	r1i1p1	BNU–ESM	RCP4.5	100	2077	2057	2100	100	14.2773	0.161676	100	2077	1	0	0
Seq	Source	BreakSet	DatasetNo	SetNo	SetNoInData	Type	Model	Treat	%BreakSet	Year	Predecessor	Successor	%SegmentFound	Ti	Shift	%YearOverall	ModalYear	ModalValue	SecondModalYear	SecondModalValue
202	r1i1p1_CanESM2_RCP4.5_005.final.csv	[1861.0, 1910, 1976, 1995, 2002, 2019, 2028, 2035, 2045, 2057, 2076, 2100.0]	8	21	1	r1i1p1	CanESM2	RCP4.5	1	1910	1861	1976	100	37.7131	0.208157	100	1910	1	0	0
203	r1i1p1_CanESM2_RCP4.5_005.final.csv	[1861.0, 1910, 1976, 1995, 2002, 2019, 2028, 2035, 2045, 2057, 2076, 2100.0]	8	21	1	r1i1p1	CanESM2	RCP4.5	1	1976	1910	1995	100	43.5503	0.323173	100	1976	0.95	1972	0.05
204	r1i1p1_CanESM2_RCP4.5_005.final.csv	[1861.0, 1910, 1976, 1995, 2002, 2019, 2028, 2035, 2045, 2057, 2076, 2100.0]	8	21	1	r1i1p1	CanESM2	RCP4.5	1	1995	1976	2002	100	16.5861	0.415716	100	1995	0.87	1993	0.08
205	r1i1p1_CanESM2_RCP4.5_005.final.csv	[1861.0, 1910, 1976, 1995, 2002, 2019, 2028, 2035, 2045, 2057, 2076, 2100.0]	8	21	1	r1i1p1	CanESM2	RCP4.5	1	2002	1995	2019	97	14.8111	0.385855	100	2002	0.78	2003	0.11
206	r1i1p1_CanESM2_RCP4.5_005.final.csv	[1861.0, 1910, 1976, 1995, 2002, 2019, 2028, 2035, 2045, 2057, 2076, 2100.0]	8	21	1	r1i1p1	CanESM2	RCP4.5	1	2019	2002	2028	95	17.921	0.429666	97	2019	0.96	2020	0.03
207	r1i1p1_CanESM2_RCP4.5_005.final.csv	[1861.0, 1910, 1976, 1995, 2002, 2019, 2028, 2035, 2045, 2057, 2076, 2100.0]	8	21	1	r1i1p1	CanESM2	RCP4.5	1	2028	2019	2035	95	10.922	0.267035	95	2028	0.76	2025	0.16
208	r1i1p1_CanESM2_RCP4.5_005.final.csv	[1861.0, 1910, 1976, 1995, 2002, 2019, 2028, 2035, 2045, 2057, 2076, 2100.0]	8	21	1	r1i1p1	CanESM2	RCP4.5	1	2035	2028	2045	95	12.655	0.306997	100	2035	0.98	2036	0.02
209	r1i1p1_CanESM2_RCP4.5_005.final.csv	[1861.0, 1910, 1976, 1995, 2002, 2019, 2028, 2035, 2045, 2057, 2076, 2100.0]	8	21	1	r1i1p1	CanESM2	RCP4.5	1	2045	2035	2057	100	12.6463	0.207494	100	2045	0.98	2046	0.01
210	r1i1p1_CanESM2_RCP4.5_005.final.csv	[1861.0, 1910, 1976, 1995, 2002, 2019, 2028, 2035, 2045, 2057, 2076, 2100.0]	8	21	1	r1i1p1	CanESM2	RCP4.5	1	2057	2045	2076	1	23.6947	0.360569	100	2057	0.77	2058	0.23
211	r1i1p1_CanESM2_RCP4.5_005.final.csv	[1861.0, 1910, 1976, 1995, 2002, 2019, 2028, 2035, 2045, 2057, 2076, 2100.0]	8	21	1	r1i1p1	CanESM2	RCP4.5	1	2076	2057	2100	1	22.1753	0.236045	1	2074	0.49	2076	0.29
212	r1i1p1_CanESM2_RCP4.5_005.final.csv	[1861.0, 1910, 1976, 1995, 2002, 2019, 2035, 2045, 2057, 2074, 2100.0]	8	22	2	r1i1p1	CanESM2	RCP4.5	2	1910	1861	1976	100	37.7131	0.208157	100	1910	1	0	0
213	r1i1p1_CanESM2_RCP4.5_005.final.csv	[1861.0, 1910, 1976, 1995, 2002, 2019, 2035, 2045, 2057, 2074, 2100.0]	8	22	2	r1i1p1	CanESM2	RCP4.5	2	1976	1910	1995	100	43.5503	0.323173	100	1976	0.95	1972	0.05
214	r1i1p1_CanESM2_RCP4.5_005.final.csv	[1861.0, 1910, 1976, 1995, 2002, 2019, 2035, 2045, 2057, 2074, 2100.0]	8	22	2	r1i1p1	CanESM2	RCP4.5	2	1995	1976	2002	100	16.5861	0.415716	100	1995	0.87	1993	0.08
215	r1i1p1_CanESM2_RCP4.5_005.final.csv	[1861.0, 1910, 1976, 1995, 2002, 2019, 2035, 2045, 2057, 2074, 2100.0]	8	22	2	r1i1p1	CanESM2	RCP4.5	2	2002	1995	2019	97	14.8111	0.385855	100	2002	0.78	2003	0.11
216	r1i1p1_CanESM2_RCP4.5_005.final.csv	[1861.0, 1910, 1976, 1995, 2002, 2019, 2035, 2045, 2057, 2074, 2100.0]	8	22	2	r1i1p1	CanESM2	RCP4.5	2	2019	2002	2035	2	24.6948	0.551572	97	2020	0.49	2019	0.37
217	r1i1p1_CanESM2_RCP4.5_005.final.csv	[1861.0, 1910, 1976, 1995, 2002, 2019, 2035, 2045, 2057, 2074, 2100.0]	8	22	2	r1i1p1	CanESM2	RCP4.5	2	2035	2019	2045	2	18.5099	0.456456	100	2035	0.51	2034	0.46
218	r1i1p1_CanESM2_RCP4.5_005.final.csv	[1861.0, 1910, 1976, 1995, 2002, 2019, 2035, 2045, 2057, 2074, 2100.0]	8	22	2	r1i1p1	CanESM2	RCP4.5	2	2045	2035	2057	100	12.6463	0.207494	100	2045	0.98	2046	0.01
219	r1i1p1_CanESM2_RCP4.5_005.final.csv	[1861.0, 1910, 1976, 1995, 2002, 2019, 2035, 2045, 2057, 2074, 2100.0]	8	22	2	r1i1p1	CanESM2	RCP4.5	2	2057	2045	2074	99	22.1655	0.348379	100	2057	0.88	2058	0.09
220	r1i1p1_CanESM2_RCP4.5_005.final.csv	[1861.0, 1910, 1976, 1995, 2002, 2019, 2035, 2045, 2057, 2074, 2100.0]	8	22	2	r1i1p1	CanESM2	RCP4.5	2	2074	2057	2100	99	22.1753	0.236045	99	2074	0.49	2076	0.29
221	r1i1p1_CanESM2_RCP4.5_005.final.csv	[1861.0, 1910, 1976, 1995, 2002, 2020, 2035, 2045, 2057, 2074, 2100.0]	8	23	3	r1i1p1	CanESM2	RCP4.5	3	1910	1861	1976	100	37.7131	0.208157	100	1910	1	0	0
222	r1i1p1_CanESM2_RCP4.5_005.final.csv	[1861.0, 1910, 1976, 1995, 2002, 2020, 2035, 2045, 2057, 2074, 2100.0]	8	23	3	r1i1p1	CanESM2	RCP4.5	3	1976	1910	1995	100	43.5503	0.323173	100	1976	0.95	1972	0.05
223	r1i1p1_CanESM2_RCP4.5_005.final.csv	[1861.0, 1910, 1976, 1995, 2002, 2020, 2035, 2045, 2057, 2074, 2100.0]	8	23	3	r1i1p1	CanESM2	RCP4.5	3	1995	1976	2002	100	16.5861	0.415716	100	1995	0.87	1993	0.08
224	r1i1p1_CanESM2_RCP4.5_005.final.csv	[1861.0, 1910, 1976, 1995, 2002, 2020, 2035, 2045, 2057, 2074, 2100.0]	8	23	3	r1i1p1	CanESM2	RCP4.5	3	2002	1995	2020	3	15.1088	0.402434	100	2002	0.75	2003	0.13
225	r1i1p1_CanESM2_RCP4.5_005.final.csv	[1861.0, 1910, 1976, 1995, 2002, 2020, 2035, 2045, 2057, 2074, 2100.0]	8	23	3	r1i1p1	CanESM2	RCP4.5	3	2020	2002	2035	3	24.6948	0.551572	3	2020	0.49	2019	0.37
226	r1i1p1_CanESM2_RCP4.5_005.final.csv	[1861.0, 1910, 1976, 1995, 2002, 2020, 2035, 2045, 2057, 2074, 2100.0]	8	23	3	r1i1p1	CanESM2	RCP4.5	3	2035	2020	2045	3	18.0973	0.439648	100	2035	0.82	2034	0.18
227	r1i1p1_CanESM2_RCP4.5_005.final.csv	[1861.0, 1910, 1976, 1995, 2002, 2020, 2035, 2045, 2057, 2074, 2100.0]	8	23	3	r1i1p1	CanESM2	RCP4.5	3	2045	2035	2057	100	12.6463	0.207494	100	2045	0.98	2046	0.01
228	r1i1p1_CanESM2_RCP4.5_005.final.csv	[1861.0, 1910, 1976, 1995, 2002, 2020, 2035, 2045, 2057, 2074, 2100.0]	8	23	3	r1i1p1	CanESM2	RCP4.5	3	2057	2045	2074	99	22.1655	0.348379	100	2057	0.88	2058	0.09
229	r1i1p1_CanESM2_RCP4.5_005.final.csv	[1861.0, 1910, 1976, 1995, 2002, 2020, 2035, 2045, 2057, 2074, 2100.0]	8	23	3	r1i1p1	CanESM2	RCP4.5	3	2074	2057	2100	99	22.1753	0.236045	99	2074	0.49	2076	0.29
230	r1i1p1_CanESM2_RCP4.5_005.final.csv	[1861.0, 1910, 1976, 1995, 2002, 2019, 2028, 2035, 2045, 2057, 2074, 2100.0]	8	24	4	r1i1p1	CanESM2	RCP4.5	94	1910	1861	1976	100	37.7131	0.208157	100	1910	1	0	0
231	r1i1p1_CanESM2_RCP4.5_005.final.csv	[1861.0, 1910, 1976, 1995, 2002, 2019, 2028, 2035, 2045, 2057, 2074, 2100.0]	8	24	4	r1i1p1	CanESM2	RCP4.5	94	1976	1910	1995	100	43.5503	0.323173	100	1976	0.95	1972	0.05
232	r1i1p1_CanESM2_RCP4.5_005.final.csv	[1861.0, 1910, 1976, 1995, 2002, 2019, 2028, 2035, 2045, 2057, 2074, 2100.0]	8	24	4	r1i1p1	CanESM2	RCP4.5	94	1995	1976	2002	100	16.5861	0.415716	100	1995	0.87	1993	0.08
233	r1i1p1_CanESM2_RCP4.5_005.final.csv	[1861.0, 1910, 1976, 1995, 2002, 2019, 2028, 2035, 2045, 2057, 2074, 2100.0]	8	24	4	r1i1p1	CanESM2	RCP4.5	94	2002	1995	2019	97	14.8111	0.385855	100	2002	0.78	2003	0.11
234	r1i1p1_CanESM2_RCP4.5_005.final.csv	[1861.0, 1910, 1976, 1995, 2002, 2019, 2028, 2035, 2045, 2057, 2074, 2100.0]	8	24	4	r1i1p1	CanESM2	RCP4.5	94	2019	2002	2028	95	17.921	0.429666	97	2019	0.96	2020	0.03
235	r1i1p1_CanESM2_RCP4.5_005.final.csv	[1861.0, 1910, 1976, 1995, 2002, 2019, 2028, 2035, 2045, 2057, 2074, 2100.0]	8	24	4	r1i1p1	CanESM2	RCP4.5	94	2028	2019	2035	95	10.922	0.267035	95	2028	0.76	2025	0.16
236	r1i1p1_CanESM2_RCP4.5_005.final.csv	[1861.0, 1910, 1976, 1995, 2002, 2019, 2028, 2035, 2045, 2057, 2074, 2100.0]	8	24	4	r1i1p1	CanESM2	RCP4.5	94	2035	2028	2045	95	12.655	0.306997	100	2035	0.98	2036	0.02
237	r1i1p1_CanESM2_RCP4.5_005.final.csv	[1861.0, 1910, 1976, 1995, 2002, 2019, 2028, 2035, 2045, 2057, 2074, 2100.0]	8	24	4	r1i1p1	CanESM2	RCP4.5	94	2045	2035	2057	100	12.6463	0.207494	100	2045	0.98	2046	0.01
238	r1i1p1_CanESM2_RCP4.5_005.final.csv	[1861.0, 1910, 1976, 1995, 2002, 2019, 2028, 2035, 2045, 2057, 2074, 2100.0]	8	24	4	r1i1p1	CanESM2	RCP4.5	94	2057	2045	2074	99	22.1655	0.348379	100	2057	0.88	2058	0.09
239	r1i1p1_CanESM2_RCP4.5_005.final.csv	[1861.0, 1910, 1976, 1995, 2002, 2019, 2028, 2035, 2045, 2057, 2074, 2100.0]	8	24	4	r1i1p1	CanESM2	RCP4.5	94	2074	2057	2100	99	22.1753	0.236045	99	2074	0.49	2076	0.29
Seq	Source	BreakSet	DatasetNo	SetNo	SetNoInData	Type	Model	Treat	%BreakSet	Year	Predecessor	Successor	%SegmentFound	Ti	Shift	%YearOverall	ModalYear	ModalValue	SecondModalYear	SecondModalValue
240	r1i1p1_CCSM4_RCP4.5_010.final.csv	[1861.0, 1919, 1974, 1997, 2013, 2030, 2042, 2059, 2080, 2100.0]	9	25	1	r1i1p1	CCSM4	RCP4.5	88	1919	1861	1974	95	64.0347	0.337203	95	1919	0.53	1918	0.27
241	r1i1p1_CCSM4_RCP4.5_010.final.csv	[1861.0, 1919, 1974, 1997, 2013, 2030, 2042, 2059, 2080, 2100.0]	9	25	1	r1i1p1	CCSM4	RCP4.5	88	1974	1919	1997	95	54.7104	0.399655	100	1974	0.97	1973	0.02
242	r1i1p1_CCSM4_RCP4.5_010.final.csv	[1861.0, 1919, 1974, 1997, 2013, 2030, 2042, 2059, 2080, 2100.0]	9	25	1	r1i1p1	CCSM4	RCP4.5	88	1997	1974	2013	93	32.2744	0.582995	100	1997	0.99	1996	0.01
243	r1i1p1_CCSM4_RCP4.5_010.final.csv	[1861.0, 1919, 1974, 1997, 2013, 2030, 2042, 2059, 2080, 2100.0]	9	25	1	r1i1p1	CCSM4	RCP4.5	88	2013	1997	2030	93	19.7547	0.275914	93	2013	0.98	2005	0.02
244	r1i1p1_CCSM4_RCP4.5_010.final.csv	[1861.0, 1919, 1974, 1997, 2013, 2030, 2042, 2059, 2080, 2100.0]	9	25	1	r1i1p1	CCSM4	RCP4.5	88	2030	2013	2042	93	22.652	0.357439	93	2030	1	0	0
245	r1i1p1_CCSM4_RCP4.5_010.final.csv	[1861.0, 1919, 1974, 1997, 2013, 2030, 2042, 2059, 2080, 2100.0]	9	25	1	r1i1p1	CCSM4	RCP4.5	88	2042	2030	2059	93	19.9055	0.241748	93	2042	0.97	2038	0.03
246	r1i1p1_CCSM4_RCP4.5_010.final.csv	[1861.0, 1919, 1974, 1997, 2013, 2030, 2042, 2059, 2080, 2100.0]	9	25	1	r1i1p1	CCSM4	RCP4.5	88	2059	2042	2080	93	30.6696	0.321116	100	2059	0.98	2058	0.02
247	r1i1p1_CCSM4_RCP4.5_010.final.csv	[1861.0, 1919, 1974, 1997, 2013, 2030, 2042, 2059, 2080, 2100.0]	9	25	1	r1i1p1	CCSM4	RCP4.5	88	2080	2059	2100	100	14.184	0.126452	100	2080	0.75	2094	0.19
248	r1i1p1_CCSM4_RCP4.5_010.final.csv	[1861.0, 1918, 1974, 1997, 2013, 2030, 2042, 2059, 2080, 2100.0]	9	26	2	r1i1p1	CCSM4	RCP4.5	5	1918	1861	1974	5	64.0347	0.337203	5	1919	0.53	1918	0.27
249	r1i1p1_CCSM4_RCP4.5_010.final.csv	[1861.0, 1918, 1974, 1997, 2013, 2030, 2042, 2059, 2080, 2100.0]	9	26	2	r1i1p1	CCSM4	RCP4.5	5	1974	1918	1997	5	55.3025	0.403	100	1974	1	0	0
250	r1i1p1_CCSM4_RCP4.5_010.final.csv	[1861.0, 1918, 1974, 1997, 2013, 2030, 2042, 2059, 2080, 2100.0]	9	26	2	r1i1p1	CCSM4	RCP4.5	5	1997	1974	2013	93	32.2744	0.582995	100	1997	0.99	1996	0.01
251	r1i1p1_CCSM4_RCP4.5_010.final.csv	[1861.0, 1918, 1974, 1997, 2013, 2030, 2042, 2059, 2080, 2100.0]	9	26	2	r1i1p1	CCSM4	RCP4.5	5	2013	1997	2030	93	19.7547	0.275914	93	2013	0.98	2005	0.02
252	r1i1p1_CCSM4_RCP4.5_010.final.csv	[1861.0, 1918, 1974, 1997, 2013, 2030, 2042, 2059, 2080, 2100.0]	9	26	2	r1i1p1	CCSM4	RCP4.5	5	2030	2013	2042	93	22.652	0.357439	93	2030	1	0	0
253	r1i1p1_CCSM4_RCP4.5_010.final.csv	[1861.0, 1918, 1974, 1997, 2013, 2030, 2042, 2059, 2080, 2100.0]	9	26	2	r1i1p1	CCSM4	RCP4.5	5	2042	2030	2059	93	19.9055	0.241748	93	2042	0.97	2038	0.03
254	r1i1p1_CCSM4_RCP4.5_010.final.csv	[1861.0, 1918, 1974, 1997, 2013, 2030, 2042, 2059, 2080, 2100.0]	9	26	2	r1i1p1	CCSM4	RCP4.5	5	2059	2042	2080	93	30.6696	0.321116	100	2059	0.98	2058	0.02
255	r1i1p1_CCSM4_RCP4.5_010.final.csv	[1861.0, 1918, 1974, 1997, 2013, 2030, 2042, 2059, 2080, 2100.0]	9	26	2	r1i1p1	CCSM4	RCP4.5	5	2080	2059	2100	100	14.184	0.126452	100	2080	0.75	2094	0.19
256	r1i1p1_CCSM4_RCP4.5_010.final.csv	[1861.0, 1919, 1974, 1997, 2005, 2026, 2038, 2059, 2080, 2100.0]	9	27	3	r1i1p1	CCSM4	RCP4.5	7	1919	1861	1974	95	64.0347	0.337203	95	1919	0.53	1918	0.27
257	r1i1p1_CCSM4_RCP4.5_010.final.csv	[1861.0, 1919, 1974, 1997, 2005, 2026, 2038, 2059, 2080, 2100.0]	9	27	3	r1i1p1	CCSM4	RCP4.5	7	1974	1919	1997	95	54.7104	0.399655	100	1974	0.97	1973	0.02
258	r1i1p1_CCSM4_RCP4.5_010.final.csv	[1861.0, 1919, 1974, 1997, 2005, 2026, 2038, 2059, 2080, 2100.0]	9	27	3	r1i1p1	CCSM4	RCP4.5	7	1997	1974	2005	7	23.7411	0.496667	100	1997	0.98	1996	0.02
259	r1i1p1_CCSM4_RCP4.5_010.final.csv	[1861.0, 1919, 1974, 1997, 2005, 2026, 2038, 2059, 2080, 2100.0]	9	27	3	r1i1p1	CCSM4	RCP4.5	7	2005	1997	2026	7	16.1306	0.239488	7	2013	0.62	2005	0.35
260	r1i1p1_CCSM4_RCP4.5_010.final.csv	[1861.0, 1919, 1974, 1997, 2005, 2026, 2038, 2059, 2080, 2100.0]	9	27	3	r1i1p1	CCSM4	RCP4.5	7	2026	2005	2038	7	22.7348	0.341767	7	2026	0.84	2025	0.07
261	r1i1p1_CCSM4_RCP4.5_010.final.csv	[1861.0, 1919, 1974, 1997, 2005, 2026, 2038, 2059, 2080, 2100.0]	9	27	3	r1i1p1	CCSM4	RCP4.5	7	2038	2026	2059	7	23.0329	0.323799	7	2038	0.9	2037	0.1
262	r1i1p1_CCSM4_RCP4.5_010.final.csv	[1861.0, 1919, 1974, 1997, 2005, 2026, 2038, 2059, 2080, 2100.0]	9	27	3	r1i1p1	CCSM4	RCP4.5	7	2059	2038	2080	7	33.4154	0.350786	100	2059	0.86	2058	0.14
263	r1i1p1_CCSM4_RCP4.5_010.final.csv	[1861.0, 1919, 1974, 1997, 2005, 2026, 2038, 2059, 2080, 2100.0]	9	27	3	r1i1p1	CCSM4	RCP4.5	7	2080	2059	2100	100	14.184	0.126452	100	2080	0.75	2094	0.19
Seq	Source	BreakSet	DatasetNo	SetNo	SetNoInData	Type	Model	Treat	%BreakSet	Year	Predecessor	Successor	%SegmentFound	Ti	Shift	%YearOverall	ModalYear	ModalValue	SecondModalYear	SecondModalValue
264	r1i1p1_CESM1–BGC_RCP4.5_016.final.csv	[1861.0, 1930, 1969, 1994, 2004, 2020, 2032, 2040, 2049, 2063, 2100.0]	10	28	1	r1i1p1	CESM1–BGC	RCP4.5	100	1930	1861	1969	100	46.9617	0.238876	100	1930	0.9	1932	0.08
265	r1i1p1_CESM1–BGC_RCP4.5_016.final.csv	[1861.0, 1930, 1969, 1994, 2004, 2020, 2032, 2040, 2049, 2063, 2100.0]	10	28	1	r1i1p1	CESM1–BGC	RCP4.5	100	1969	1930	1994	100	42.7153	0.362786	100	1969	0.85	1968	0.15
266	r1i1p1_CESM1–BGC_RCP4.5_016.final.csv	[1861.0, 1930, 1969, 1994, 2004, 2020, 2032, 2040, 2049, 2063, 2100.0]	10	28	1	r1i1p1	CESM1–BGC	RCP4.5	100	1994	1969	2004	100	23.3783	0.434381	100	1994	0.95	1995	0.05
267	r1i1p1_CESM1–BGC_RCP4.5_016.final.csv	[1861.0, 1930, 1969, 1994, 2004, 2020, 2032, 2040, 2049, 2063, 2100.0]	10	28	1	r1i1p1	CESM1–BGC	RCP4.5	100	2004	1994	2020	100	20.0899	0.325623	100	2004	0.95	2003	0.05
268	r1i1p1_CESM1–BGC_RCP4.5_016.final.csv	[1861.0, 1930, 1969, 1994, 2004, 2020, 2032, 2040, 2049, 2063, 2100.0]	10	28	1	r1i1p1	CESM1–BGC	RCP4.5	100	2020	2004	2032	100	22.662	0.279987	100	2020	1	0	0
269	r1i1p1_CESM1–BGC_RCP4.5_016.final.csv	[1861.0, 1930, 1969, 1994, 2004, 2020, 2032, 2040, 2049, 2063, 2100.0]	10	28	1	r1i1p1	CESM1–BGC	RCP4.5	100	2032	2020	2040	100	13.0014	0.175945	100	2032	0.97	2031	0.03
270	r1i1p1_CESM1–BGC_RCP4.5_016.final.csv	[1861.0, 1930, 1969, 1994, 2004, 2020, 2032, 2040, 2049, 2063, 2100.0]	10	28	1	r1i1p1	CESM1–BGC	RCP4.5	100	2040	2032	2049	100	12.7952	0.216063	100	2040	1	0	0
271	r1i1p1_CESM1–BGC_RCP4.5_016.final.csv	[1861.0, 1930, 1969, 1994, 2004, 2020, 2032, 2040, 2049, 2063, 2100.0]	10	28	1	r1i1p1	CESM1–BGC	RCP4.5	100	2049	2040	2063	100	15.7448	0.247713	100	2049	1	0	0
272	r1i1p1_CESM1–BGC_RCP4.5_016.final.csv	[1861.0, 1930, 1969, 1994, 2004, 2020, 2032, 2040, 2049, 2063, 2100.0]	10	28	1	r1i1p1	CESM1–BGC	RCP4.5	100	2063	2049	2100	100	24.9403	0.176663	100	2063	0.98	2073	0.02
Seq	Source	BreakSet	DatasetNo	SetNo	SetNoInData	Type	Model	Treat	%BreakSet	Year	Predecessor	Successor	%SegmentFound	Ti	Shift	%YearOverall	ModalYear	ModalValue	SecondModalYear	SecondModalValue
273	r1i1p1_CESM1–CAM5_RCP4.5_017.final.csv	[1861.0, 1883, 1914, 1971, 1997, 2013, 2028, 2042, 2053, 2065, 2080, 2100.0]	11	29	1	r1i1p1	CESM1–CAM5	RCP4.5	95	1883	1861	1914	100	15.6109	–0.138743683032	100	1883	0.99	1875	0.01
274	r1i1p1_CESM1–CAM5_RCP4.5_017.final.csv	[1861.0, 1883, 1914, 1971, 1997, 2013, 2028, 2042, 2053, 2065, 2080, 2100.0]	11	29	1	r1i1p1	CESM1–CAM5	RCP4.5	95	1914	1883	1971	100	49.1082	0.212697	100	1914	1	0	0
275	r1i1p1_CESM1–CAM5_RCP4.5_017.final.csv	[1861.0, 1883, 1914, 1971, 1997, 2013, 2028, 2042, 2053, 2065, 2080, 2100.0]	11	29	1	r1i1p1	CESM1–CAM5	RCP4.5	95	1971	1914	1997	100	53.3096	0.238255	100	1971	0.95	1970	0.05
276	r1i1p1_CESM1–CAM5_RCP4.5_017.final.csv	[1861.0, 1883, 1914, 1971, 1997, 2013, 2028, 2042, 2053, 2065, 2080, 2100.0]	11	29	1	r1i1p1	CESM1–CAM5	RCP4.5	95	1997	1971	2013	95	32.8609	0.457634	100	1997	1	0	0
277	r1i1p1_CESM1–CAM5_RCP4.5_017.final.csv	[1861.0, 1883, 1914, 1971, 1997, 2013, 2028, 2042, 2053, 2065, 2080, 2100.0]	11	29	1	r1i1p1	CESM1–CAM5	RCP4.5	95	2013	1997	2028	95	20.2045	0.377975	95	2013	0.8	2012	0.2
278	r1i1p1_CESM1–CAM5_RCP4.5_017.final.csv	[1861.0, 1883, 1914, 1971, 1997, 2013, 2028, 2042, 2053, 2065, 2080, 2100.0]	11	29	1	r1i1p1	CESM1–CAM5	RCP4.5	95	2028	2013	2042	95	22.3984	0.529216	95	2028	0.97	2029	0.02
279	r1i1p1_CESM1–CAM5_RCP4.5_017.final.csv	[1861.0, 1883, 1914, 1971, 1997, 2013, 2028, 2042, 2053, 2065, 2080, 2100.0]	11	29	1	r1i1p1	CESM1–CAM5	RCP4.5	95	2042	2028	2053	95	14.7229	0.301883	99	2042	0.75	2035	0.07
280	r1i1p1_CESM1–CAM5_RCP4.5_017.final.csv	[1861.0, 1883, 1914, 1971, 1997, 2013, 2028, 2042, 2053, 2065, 2080, 2100.0]	11	29	1	r1i1p1	CESM1–CAM5	RCP4.5	95	2053	2042	2065	99	14.7723	0.271422	100	2053	0.9	2054	0.05
281	r1i1p1_CESM1–CAM5_RCP4.5_017.final.csv	[1861.0, 1883, 1914, 1971, 1997, 2013, 2028, 2042, 2053, 2065, 2080, 2100.0]	11	29	1	r1i1p1	CESM1–CAM5	RCP4.5	95	2065	2053	2080	100	18.8247	0.300318	100	2065	0.88	2064	0.12
282	r1i1p1_CESM1–CAM5_RCP4.5_017.final.csv	[1861.0, 1883, 1914, 1971, 1997, 2013, 2028, 2042, 2053, 2065, 2080, 2100.0]	11	29	1	r1i1p1	CESM1–CAM5	RCP4.5	95	2080	2065	2100	100	22.0171	0.291339	100	2080	1	0	0
283	r1i1p1_CESM1–CAM5_RCP4.5_017.final.csv	[1861.0, 1883, 1914, 1971, 1997, 2008, 2023, 2035, 2053, 2065, 2080, 2100.0]	11	30	2	r1i1p1	CESM1–CAM5	RCP4.5	1	1883	1861	1914	100	15.6109	–0.138743683032	100	1883	0.99	1875	0.01
284	r1i1p1_CESM1–CAM5_RCP4.5_017.final.csv	[1861.0, 1883, 1914, 1971, 1997, 2008, 2023, 2035, 2053, 2065, 2080, 2100.0]	11	30	2	r1i1p1	CESM1–CAM5	RCP4.5	1	1914	1883	1971	100	49.1082	0.212697	100	1914	1	0	0
285	r1i1p1_CESM1–CAM5_RCP4.5_017.final.csv	[1861.0, 1883, 1914, 1971, 1997, 2008, 2023, 2035, 2053, 2065, 2080, 2100.0]	11	30	2	r1i1p1	CESM1–CAM5	RCP4.5	1	1971	1914	1997	100	53.3096	0.238255	100	1971	0.95	1970	0.05
286	r1i1p1_CESM1–CAM5_RCP4.5_017.final.csv	[1861.0, 1883, 1914, 1971, 1997, 2008, 2023, 2035, 2053, 2065, 2080, 2100.0]	11	30	2	r1i1p1	CESM1–CAM5	RCP4.5	1	1997	1971	2008	5	28.1267	0.400168	100	1997	1	0	0
287	r1i1p1_CESM1–CAM5_RCP4.5_017.final.csv	[1861.0, 1883, 1914, 1971, 1997, 2008, 2023, 2035, 2053, 2065, 2080, 2100.0]	11	30	2	r1i1p1	CESM1–CAM5	RCP4.5	1	2008	1997	2023	5	16.8279	0.301649	5	2008	0.75	2012	0.11
288	r1i1p1_CESM1–CAM5_RCP4.5_017.final.csv	[1861.0, 1883, 1914, 1971, 1997, 2008, 2023, 2035, 2053, 2065, 2080, 2100.0]	11	30	2	r1i1p1	CESM1–CAM5	RCP4.5	1	2023	2008	2035	1	19.0192	0.452908	5	2023	0.93	2028	0.04
289	r1i1p1_CESM1–CAM5_RCP4.5_017.final.csv	[1861.0, 1883, 1914, 1971, 1997, 2008, 2023, 2035, 2053, 2065, 2080, 2100.0]	11	30	2	r1i1p1	CESM1–CAM5	RCP4.5	1	2035	2023	2053	1	19.9041	0.439376	1	2035	0.75	2033	0.17
290	r1i1p1_CESM1–CAM5_RCP4.5_017.final.csv	[1861.0, 1883, 1914, 1971, 1997, 2008, 2023, 2035, 2053, 2065, 2080, 2100.0]	11	30	2	r1i1p1	CESM1–CAM5	RCP4.5	1	2053	2035	2065	1	19.9413	0.352123	100	2053	0.59	2052	0.32
291	r1i1p1_CESM1–CAM5_RCP4.5_017.final.csv	[1861.0, 1883, 1914, 1971, 1997, 2008, 2023, 2035, 2053, 2065, 2080, 2100.0]	11	30	2	r1i1p1	CESM1–CAM5	RCP4.5	1	2065	2053	2080	100	18.8247	0.300318	100	2065	0.88	2064	0.12
292	r1i1p1_CESM1–CAM5_RCP4.5_017.final.csv	[1861.0, 1883, 1914, 1971, 1997, 2008, 2023, 2035, 2053, 2065, 2080, 2100.0]	11	30	2	r1i1p1	CESM1–CAM5	RCP4.5	1	2080	2065	2100	100	22.0171	0.291339	100	2080	1	0	0
293	r1i1p1_CESM1–CAM5_RCP4.5_017.final.csv	[1861.0, 1883, 1914, 1971, 1997, 2008, 2023, 2032, 2042, 2053, 2065, 2080, 2100.0]	11	31	3	r1i1p1	CESM1–CAM5	RCP4.5	4	1883	1861	1914	100	15.6109	–0.138743683032	100	1883	0.99	1875	0.01
294	r1i1p1_CESM1–CAM5_RCP4.5_017.final.csv	[1861.0, 1883, 1914, 1971, 1997, 2008, 2023, 2032, 2042, 2053, 2065, 2080, 2100.0]	11	31	3	r1i1p1	CESM1–CAM5	RCP4.5	4	1914	1883	1971	100	49.1082	0.212697	100	1914	1	0	0
295	r1i1p1_CESM1–CAM5_RCP4.5_017.final.csv	[1861.0, 1883, 1914, 1971, 1997, 2008, 2023, 2032, 2042, 2053, 2065, 2080, 2100.0]	11	31	3	r1i1p1	CESM1–CAM5	RCP4.5	4	1971	1914	1997	100	53.3096	0.238255	100	1971	0.95	1970	0.05
296	r1i1p1_CESM1–CAM5_RCP4.5_017.final.csv	[1861.0, 1883, 1914, 1971, 1997, 2008, 2023, 2032, 2042, 2053, 2065, 2080, 2100.0]	11	31	3	r1i1p1	CESM1–CAM5	RCP4.5	4	1997	1971	2008	5	28.1267	0.400168	100	1997	1	0	0
297	r1i1p1_CESM1–CAM5_RCP4.5_017.final.csv	[1861.0, 1883, 1914, 1971, 1997, 2008, 2023, 2032, 2042, 2053, 2065, 2080, 2100.0]	11	31	3	r1i1p1	CESM1–CAM5	RCP4.5	4	2008	1997	2023	5	16.8279	0.301649	5	2008	0.75	2012	0.11
298	r1i1p1_CESM1–CAM5_RCP4.5_017.final.csv	[1861.0, 1883, 1914, 1971, 1997, 2008, 2023, 2032, 2042, 2053, 2065, 2080, 2100.0]	11	31	3	r1i1p1	CESM1–CAM5	RCP4.5	4	2023	2008	2032	4	16.1684	0.394775	5	2023	0.98	2022	0.02
299	r1i1p1_CESM1–CAM5_RCP4.5_017.final.csv	[1861.0, 1883, 1914, 1971, 1997, 2008, 2023, 2032, 2042, 2053, 2065, 2080, 2100.0]	11	31	3	r1i1p1	CESM1–CAM5	RCP4.5	4	2032	2023	2042	4	12.1031	0.331202	4	2032	0.39	2029	0.37
300	r1i1p1_CESM1–CAM5_RCP4.5_017.final.csv	[1861.0, 1883, 1914, 1971, 1997, 2008, 2023, 2032, 2042, 2053, 2065, 2080, 2100.0]	11	31	3	r1i1p1	CESM1–CAM5	RCP4.5	4	2042	2032	2053	4	12.1881	0.242127	99	2042	0.9	2043	0.09
301	r1i1p1_CESM1–CAM5_RCP4.5_017.final.csv	[1861.0, 1883, 1914, 1971, 1997, 2008, 2023, 2032, 2042, 2053, 2065, 2080, 2100.0]	11	31	3	r1i1p1	CESM1–CAM5	RCP4.5	4	2053	2042	2065	99	14.7723	0.271422	100	2053	0.9	2054	0.05
302	r1i1p1_CESM1–CAM5_RCP4.5_017.final.csv	[1861.0, 1883, 1914, 1971, 1997, 2008, 2023, 2032, 2042, 2053, 2065, 2080, 2100.0]	11	31	3	r1i1p1	CESM1–CAM5	RCP4.5	4	2065	2053	2080	100	18.8247	0.300318	100	2065	0.88	2064	0.12
303	r1i1p1_CESM1–CAM5_RCP4.5_017.final.csv	[1861.0, 1883, 1914, 1971, 1997, 2008, 2023, 2032, 2042, 2053, 2065, 2080, 2100.0]	11	31	3	r1i1p1	CESM1–CAM5	RCP4.5	4	2080	2065	2100	100	22.0171	0.291339	100	2080	1	0	0
Seq	Source	BreakSet	DatasetNo	SetNo	SetNoInData	Type	Model	Treat	%BreakSet	Year	Predecessor	Successor	%SegmentFound	Ti	Shift	%YearOverall	ModalYear	ModalValue	SecondModalYear	SecondModalValue
304	r1i1p1_CMCC–CM_RCP4.5_020.final.csv	[1861.0, 1936, 1977, 1990, 1999, 2011, 2022, 2038, 2052, 2062, 2070, 2100.0]	12	32	1	r1i1p1	CMCC–CM	RCP4.5	100	1936	1861	1977	100	33.2773	0.140303	100	1936	0.89	1932	0.08
305	r1i1p1_CMCC–CM_RCP4.5_020.final.csv	[1861.0, 1936, 1977, 1990, 1999, 2011, 2022, 2038, 2052, 2062, 2070, 2100.0]	12	32	1	r1i1p1	CMCC–CM	RCP4.5	100	1977	1936	1990	100	20.5983	0.175336	100	1977	0.99	1967	0.01
306	r1i1p1_CMCC–CM_RCP4.5_020.final.csv	[1861.0, 1936, 1977, 1990, 1999, 2011, 2022, 2038, 2052, 2062, 2070, 2100.0]	12	32	1	r1i1p1	CMCC–CM	RCP4.5	100	1990	1977	1999	100	14.81	0.216674	100	1990	0.63	1987	0.16
307	r1i1p1_CMCC–CM_RCP4.5_020.final.csv	[1861.0, 1936, 1977, 1990, 1999, 2011, 2022, 2038, 2052, 2062, 2070, 2100.0]	12	32	1	r1i1p1	CMCC–CM	RCP4.5	100	1999	1990	2011	100	17.2556	0.283558	100	1999	0.97	2000	0.03
308	r1i1p1_CMCC–CM_RCP4.5_020.final.csv	[1861.0, 1936, 1977, 1990, 1999, 2011, 2022, 2038, 2052, 2062, 2070, 2100.0]	12	32	1	r1i1p1	CMCC–CM	RCP4.5	100	2011	1999	2022	100	18.9803	0.23763	100	2011	1	0	0
309	r1i1p1_CMCC–CM_RCP4.5_020.final.csv	[1861.0, 1936, 1977, 1990, 1999, 2011, 2022, 2038, 2052, 2062, 2070, 2100.0]	12	32	1	r1i1p1	CMCC–CM	RCP4.5	100	2022	2011	2038	100	20.3181	0.345329	100	2022	1	0	0
310	r1i1p1_CMCC–CM_RCP4.5_020.final.csv	[1861.0, 1936, 1977, 1990, 1999, 2011, 2022, 2038, 2052, 2062, 2070, 2100.0]	12	32	1	r1i1p1	CMCC–CM	RCP4.5	100	2038	2022	2052	100	22.1568	0.408918	100	2038	0.93	2039	0.04
311	r1i1p1_CMCC–CM_RCP4.5_020.final.csv	[1861.0, 1936, 1977, 1990, 1999, 2011, 2022, 2038, 2052, 2062, 2070, 2100.0]	12	32	1	r1i1p1	CMCC–CM	RCP4.5	100	2052	2038	2062	100	17.9918	0.424583	100	2052	0.97	2053	0.02
312	r1i1p1_CMCC–CM_RCP4.5_020.final.csv	[1861.0, 1936, 1977, 1990, 1999, 2011, 2022, 2038, 2052, 2062, 2070, 2100.0]	12	32	1	r1i1p1	CMCC–CM	RCP4.5	100	2062	2052	2070	100	10.122	0.240201	100	2055	0.42	2057	0.42
313	r1i1p1_CMCC–CM_RCP4.5_020.final.csv	[1861.0, 1936, 1977, 1990, 1999, 2011, 2022, 2038, 2052, 2062, 2070, 2100.0]	12	32	1	r1i1p1	CMCC–CM	RCP4.5	100	2070	2062	2100	100	25.4758	0.286269	100	2070	0.97	2074	0.03
Seq	Source	BreakSet	DatasetNo	SetNo	SetNoInData	Type	Model	Treat	%BreakSet	Year	Predecessor	Successor	%SegmentFound	Ti	Shift	%YearOverall	ModalYear	ModalValue	SecondModalYear	SecondModalValue
314	r1i1p1_CMCC–CMS_RCP4.5_021.final.csv	[1861.0, 1983, 1990, 2012, 2029, 2042, 2057, 2072, 2100.0]	13	33	1	r1i1p1	CMCC–CMS	RCP4.5	100	1983	1861	1990	100	34.5866	0.285642	100	1983	1	0	0
315	r1i1p1_CMCC–CMS_RCP4.5_021.final.csv	[1861.0, 1983, 1990, 2012, 2029, 2042, 2057, 2072, 2100.0]	13	33	1	r1i1p1	CMCC–CMS	RCP4.5	100	1990	1983	2012	100	14.9888	0.346031	100	1990	0.82	1991	0.08
316	r1i1p1_CMCC–CMS_RCP4.5_021.final.csv	[1861.0, 1983, 1990, 2012, 2029, 2042, 2057, 2072, 2100.0]	13	33	1	r1i1p1	CMCC–CMS	RCP4.5	100	2012	1990	2029	100	28.9409	0.501579	100	2012	0.99	2014	0.01
317	r1i1p1_CMCC–CMS_RCP4.5_021.final.csv	[1861.0, 1983, 1990, 2012, 2029, 2042, 2057, 2072, 2100.0]	13	33	1	r1i1p1	CMCC–CMS	RCP4.5	100	2029	2012	2042	100	21.1357	0.437484	100	2029	0.85	2028	0.15
318	r1i1p1_CMCC–CMS_RCP4.5_021.final.csv	[1861.0, 1983, 1990, 2012, 2029, 2042, 2057, 2072, 2100.0]	13	33	1	r1i1p1	CMCC–CMS	RCP4.5	100	2042	2029	2057	100	18.2548	0.38894	100	2042	0.96	2041	0.03
319	r1i1p1_CMCC–CMS_RCP4.5_021.final.csv	[1861.0, 1983, 1990, 2012, 2029, 2042, 2057, 2072, 2100.0]	13	33	1	r1i1p1	CMCC–CMS	RCP4.5	100	2057	2042	2072	100	18.2261	0.360257	100	2057	0.65	2056	0.31
320	r1i1p1_CMCC–CMS_RCP4.5_021.final.csv	[1861.0, 1983, 1990, 2012, 2029, 2042, 2057, 2072, 2100.0]	13	33	1	r1i1p1	CMCC–CMS	RCP4.5	100	2072	2057	2100	100	28.3341	0.360076	100	2072	0.73	2071	0.24
Seq	Source	BreakSet	DatasetNo	SetNo	SetNoInData	Type	Model	Treat	%BreakSet	Year	Predecessor	Successor	%SegmentFound	Ti	Shift	%YearOverall	ModalYear	ModalValue	SecondModalYear	SecondModalValue
321	r1i1p1_CNRM–CM5_RCP4.5_022.final.csv	[1861.0, 1891, 1935, 1985, 1999, 2007, 2024, 2037, 2050, 2059, 2070, 2082, 2100.0]	14	34	1	r1i1p1	CNRM–CM5	RCP4.5	1	1891	1861	1935	26	18.2946	0.16512	26	1891	0.7	1892	0.3
322	r1i1p1_CNRM–CM5_RCP4.5_022.final.csv	[1861.0, 1891, 1935, 1985, 1999, 2007, 2024, 2037, 2050, 2059, 2070, 2082, 2100.0]	14	34	1	r1i1p1	CNRM–CM5	RCP4.5	1	1935	1891	1985	26	26.3317	0.145001	100	1935	1	0	0
323	r1i1p1_CNRM–CM5_RCP4.5_022.final.csv	[1861.0, 1891, 1935, 1985, 1999, 2007, 2024, 2037, 2050, 2059, 2070, 2082, 2100.0]	14	34	1	r1i1p1	CNRM–CM5	RCP4.5	1	1985	1935	1999	3	29.941	0.265156	100	1985	1	0	0
324	r1i1p1_CNRM–CM5_RCP4.5_022.final.csv	[1861.0, 1891, 1935, 1985, 1999, 2007, 2024, 2037, 2050, 2059, 2070, 2082, 2100.0]	14	34	1	r1i1p1	CNRM–CM5	RCP4.5	1	1999	1985	2007	3	13.7754	0.359112	3	1999	0.7	1996	0.27
325	r1i1p1_CNRM–CM5_RCP4.5_022.final.csv	[1861.0, 1891, 1935, 1985, 1999, 2007, 2024, 2037, 2050, 2059, 2070, 2082, 2100.0]	14	34	1	r1i1p1	CNRM–CM5	RCP4.5	1	2007	1999	2024	3	12.3711	0.175813	3	2007	0.83	2012	0.07
326	r1i1p1_CNRM–CM5_RCP4.5_022.final.csv	[1861.0, 1891, 1935, 1985, 1999, 2007, 2024, 2037, 2050, 2059, 2070, 2082, 2100.0]	14	34	1	r1i1p1	CNRM–CM5	RCP4.5	1	2024	2007	2037	3	21.4267	0.300055	100	2024	0.73	2025	0.26
327	r1i1p1_CNRM–CM5_RCP4.5_022.final.csv	[1861.0, 1891, 1935, 1985, 1999, 2007, 2024, 2037, 2050, 2059, 2070, 2082, 2100.0]	14	34	1	r1i1p1	CNRM–CM5	RCP4.5	1	2037	2024	2050	100	18.7938	0.330735	100	2037	0.98	2038	0.01
328	r1i1p1_CNRM–CM5_RCP4.5_022.final.csv	[1861.0, 1891, 1935, 1985, 1999, 2007, 2024, 2037, 2050, 2059, 2070, 2082, 2100.0]	14	34	1	r1i1p1	CNRM–CM5	RCP4.5	1	2050	2037	2059	100	15.1508	0.26286	100	2050	0.84	2046	0.06
329	r1i1p1_CNRM–CM5_RCP4.5_022.final.csv	[1861.0, 1891, 1935, 1985, 1999, 2007, 2024, 2037, 2050, 2059, 2070, 2082, 2100.0]	14	34	1	r1i1p1	CNRM–CM5	RCP4.5	1	2059	2050	2070	100	12.5009	0.186439	100	2059	0.95	2058	0.03
330	r1i1p1_CNRM–CM5_RCP4.5_022.final.csv	[1861.0, 1891, 1935, 1985, 1999, 2007, 2024, 2037, 2050, 2059, 2070, 2082, 2100.0]	14	34	1	r1i1p1	CNRM–CM5	RCP4.5	1	2070	2059	2082	100	18.3024	0.257281	100	2070	1	0	0
331	r1i1p1_CNRM–CM5_RCP4.5_022.final.csv	[1861.0, 1891, 1935, 1985, 1999, 2007, 2024, 2037, 2050, 2059, 2070, 2082, 2100.0]	14	34	1	r1i1p1	CNRM–CM5	RCP4.5	1	2082	2070	2100	100	16.8251	0.15776	100	2082	0.84	2080	0.09
332	r1i1p1_CNRM–CM5_RCP4.5_022.final.csv	[1861.0, 1892, 1902, 1935, 1985, 2001, 2024, 2037, 2050, 2059, 2070, 2082, 2100.0]	14	35	2	r1i1p1	CNRM–CM5	RCP4.5	72	1892	1861	1902	74	17.2014	0.298633	74	1892	0.89	1895	0.1
333	r1i1p1_CNRM–CM5_RCP4.5_022.final.csv	[1861.0, 1892, 1902, 1935, 1985, 2001, 2024, 2037, 2050, 2059, 2070, 2082, 2100.0]	14	35	2	r1i1p1	CNRM–CM5	RCP4.5	72	1902	1892	1935	74	14.9331	–0.176414761377	74	1902	0.99	1903	0.01
334	r1i1p1_CNRM–CM5_RCP4.5_022.final.csv	[1861.0, 1892, 1902, 1935, 1985, 2001, 2024, 2037, 2050, 2059, 2070, 2082, 2100.0]	14	35	2	r1i1p1	CNRM–CM5	RCP4.5	72	1935	1902	1985	74	35.1806	0.184809	100	1935	1	0	0
335	r1i1p1_CNRM–CM5_RCP4.5_022.final.csv	[1861.0, 1892, 1902, 1935, 1985, 2001, 2024, 2037, 2050, 2059, 2070, 2082, 2100.0]	14	35	2	r1i1p1	CNRM–CM5	RCP4.5	72	1985	1935	2001	97	34.1028	0.293761	100	1985	1	0	0
336	r1i1p1_CNRM–CM5_RCP4.5_022.final.csv	[1861.0, 1892, 1902, 1935, 1985, 2001, 2024, 2037, 2050, 2059, 2070, 2082, 2100.0]	14	35	2	r1i1p1	CNRM–CM5	RCP4.5	72	2001	1985	2024	97	29.6931	0.467019	97	2001	0.84	1999	0.14
337	r1i1p1_CNRM–CM5_RCP4.5_022.final.csv	[1861.0, 1892, 1902, 1935, 1985, 2001, 2024, 2037, 2050, 2059, 2070, 2082, 2100.0]	14	35	2	r1i1p1	CNRM–CM5	RCP4.5	72	2024	2001	2037	97	25.4574	0.333169	100	2024	0.92	2025	0.05
338	r1i1p1_CNRM–CM5_RCP4.5_022.final.csv	[1861.0, 1892, 1902, 1935, 1985, 2001, 2024, 2037, 2050, 2059, 2070, 2082, 2100.0]	14	35	2	r1i1p1	CNRM–CM5	RCP4.5	72	2037	2024	2050	100	18.7938	0.330735	100	2037	0.98	2038	0.01
339	r1i1p1_CNRM–CM5_RCP4.5_022.final.csv	[1861.0, 1892, 1902, 1935, 1985, 2001, 2024, 2037, 2050, 2059, 2070, 2082, 2100.0]	14	35	2	r1i1p1	CNRM–CM5	RCP4.5	72	2050	2037	2059	100	15.1508	0.26286	100	2050	0.84	2046	0.06
340	r1i1p1_CNRM–CM5_RCP4.5_022.final.csv	[1861.0, 1892, 1902, 1935, 1985, 2001, 2024, 2037, 2050, 2059, 2070, 2082, 2100.0]	14	35	2	r1i1p1	CNRM–CM5	RCP4.5	72	2059	2050	2070	100	12.5009	0.186439	100	2059	0.95	2058	0.03
341	r1i1p1_CNRM–CM5_RCP4.5_022.final.csv	[1861.0, 1892, 1902, 1935, 1985, 2001, 2024, 2037, 2050, 2059, 2070, 2082, 2100.0]	14	35	2	r1i1p1	CNRM–CM5	RCP4.5	72	2070	2059	2082	100	18.3024	0.257281	100	2070	1	0	0
342	r1i1p1_CNRM–CM5_RCP4.5_022.final.csv	[1861.0, 1892, 1902, 1935, 1985, 2001, 2024, 2037, 2050, 2059, 2070, 2082, 2100.0]	14	35	2	r1i1p1	CNRM–CM5	RCP4.5	72	2082	2070	2100	100	16.8251	0.15776	100	2082	0.84	2080	0.09
343	r1i1p1_CNRM–CM5_RCP4.5_022.final.csv	[1861.0, 1891, 1935, 1985, 2001, 2024, 2037, 2050, 2059, 2070, 2082, 2100.0]	14	36	3	r1i1p1	CNRM–CM5	RCP4.5	25	1891	1861	1935	26	18.2946	0.16512	26	1891	0.7	1892	0.3
344	r1i1p1_CNRM–CM5_RCP4.5_022.final.csv	[1861.0, 1891, 1935, 1985, 2001, 2024, 2037, 2050, 2059, 2070, 2082, 2100.0]	14	36	3	r1i1p1	CNRM–CM5	RCP4.5	25	1935	1891	1985	26	26.3317	0.145001	100	1935	1	0	0
345	r1i1p1_CNRM–CM5_RCP4.5_022.final.csv	[1861.0, 1891, 1935, 1985, 2001, 2024, 2037, 2050, 2059, 2070, 2082, 2100.0]	14	36	3	r1i1p1	CNRM–CM5	RCP4.5	25	1985	1935	2001	97	34.1028	0.293761	100	1985	1	0	0
346	r1i1p1_CNRM–CM5_RCP4.5_022.final.csv	[1861.0, 1891, 1935, 1985, 2001, 2024, 2037, 2050, 2059, 2070, 2082, 2100.0]	14	36	3	r1i1p1	CNRM–CM5	RCP4.5	25	2001	1985	2024	97	29.6931	0.467019	97	2001	0.84	1999	0.14
347	r1i1p1_CNRM–CM5_RCP4.5_022.final.csv	[1861.0, 1891, 1935, 1985, 2001, 2024, 2037, 2050, 2059, 2070, 2082, 2100.0]	14	36	3	r1i1p1	CNRM–CM5	RCP4.5	25	2024	2001	2037	97	25.4574	0.333169	100	2024	0.92	2025	0.05
348	r1i1p1_CNRM–CM5_RCP4.5_022.final.csv	[1861.0, 1891, 1935, 1985, 2001, 2024, 2037, 2050, 2059, 2070, 2082, 2100.0]	14	36	3	r1i1p1	CNRM–CM5	RCP4.5	25	2037	2024	2050	100	18.7938	0.330735	100	2037	0.98	2038	0.01
349	r1i1p1_CNRM–CM5_RCP4.5_022.final.csv	[1861.0, 1891, 1935, 1985, 2001, 2024, 2037, 2050, 2059, 2070, 2082, 2100.0]	14	36	3	r1i1p1	CNRM–CM5	RCP4.5	25	2050	2037	2059	100	15.1508	0.26286	100	2050	0.84	2046	0.06
350	r1i1p1_CNRM–CM5_RCP4.5_022.final.csv	[1861.0, 1891, 1935, 1985, 2001, 2024, 2037, 2050, 2059, 2070, 2082, 2100.0]	14	36	3	r1i1p1	CNRM–CM5	RCP4.5	25	2059	2050	2070	100	12.5009	0.186439	100	2059	0.95	2058	0.03
351	r1i1p1_CNRM–CM5_RCP4.5_022.final.csv	[1861.0, 1891, 1935, 1985, 2001, 2024, 2037, 2050, 2059, 2070, 2082, 2100.0]	14	36	3	r1i1p1	CNRM–CM5	RCP4.5	25	2070	2059	2082	100	18.3024	0.257281	100	2070	1	0	0
352	r1i1p1_CNRM–CM5_RCP4.5_022.final.csv	[1861.0, 1891, 1935, 1985, 2001, 2024, 2037, 2050, 2059, 2070, 2082, 2100.0]	14	36	3	r1i1p1	CNRM–CM5	RCP4.5	25	2082	2070	2100	100	16.8251	0.15776	100	2082	0.84	2080	0.09
353	r1i1p1_CNRM–CM5_RCP4.5_022.final.csv	[1861.0, 1892, 1902, 1935, 1985, 1999, 2007, 2024, 2037, 2050, 2059, 2070, 2082, 2100.0]	14	37	4	r1i1p1	CNRM–CM5	RCP4.5	2	1892	1861	1902	74	17.2014	0.298633	74	1892	0.89	1895	0.1
354	r1i1p1_CNRM–CM5_RCP4.5_022.final.csv	[1861.0, 1892, 1902, 1935, 1985, 1999, 2007, 2024, 2037, 2050, 2059, 2070, 2082, 2100.0]	14	37	4	r1i1p1	CNRM–CM5	RCP4.5	2	1902	1892	1935	74	14.9331	–0.176414761377	74	1902	0.99	1903	0.01
355	r1i1p1_CNRM–CM5_RCP4.5_022.final.csv	[1861.0, 1892, 1902, 1935, 1985, 1999, 2007, 2024, 2037, 2050, 2059, 2070, 2082, 2100.0]	14	37	4	r1i1p1	CNRM–CM5	RCP4.5	2	1935	1902	1985	74	35.1806	0.184809	100	1935	1	0	0
356	r1i1p1_CNRM–CM5_RCP4.5_022.final.csv	[1861.0, 1892, 1902, 1935, 1985, 1999, 2007, 2024, 2037, 2050, 2059, 2070, 2082, 2100.0]	14	37	4	r1i1p1	CNRM–CM5	RCP4.5	2	1985	1935	1999	3	29.941	0.265156	100	1985	1	0	0
357	r1i1p1_CNRM–CM5_RCP4.5_022.final.csv	[1861.0, 1892, 1902, 1935, 1985, 1999, 2007, 2024, 2037, 2050, 2059, 2070, 2082, 2100.0]	14	37	4	r1i1p1	CNRM–CM5	RCP4.5	2	1999	1985	2007	3	13.7754	0.359112	3	1999	0.7	1996	0.27
358	r1i1p1_CNRM–CM5_RCP4.5_022.final.csv	[1861.0, 1892, 1902, 1935, 1985, 1999, 2007, 2024, 2037, 2050, 2059, 2070, 2082, 2100.0]	14	37	4	r1i1p1	CNRM–CM5	RCP4.5	2	2007	1999	2024	3	12.3711	0.175813	3	2007	0.83	2012	0.07
359	r1i1p1_CNRM–CM5_RCP4.5_022.final.csv	[1861.0, 1892, 1902, 1935, 1985, 1999, 2007, 2024, 2037, 2050, 2059, 2070, 2082, 2100.0]	14	37	4	r1i1p1	CNRM–CM5	RCP4.5	2	2024	2007	2037	3	21.4267	0.300055	100	2024	0.73	2025	0.26
360	r1i1p1_CNRM–CM5_RCP4.5_022.final.csv	[1861.0, 1892, 1902, 1935, 1985, 1999, 2007, 2024, 2037, 2050, 2059, 2070, 2082, 2100.0]	14	37	4	r1i1p1	CNRM–CM5	RCP4.5	2	2037	2024	2050	100	18.7938	0.330735	100	2037	0.98	2038	0.01
361	r1i1p1_CNRM–CM5_RCP4.5_022.final.csv	[1861.0, 1892, 1902, 1935, 1985, 1999, 2007, 2024, 2037, 2050, 2059, 2070, 2082, 2100.0]	14	37	4	r1i1p1	CNRM–CM5	RCP4.5	2	2050	2037	2059	100	15.1508	0.26286	100	2050	0.84	2046	0.06
362	r1i1p1_CNRM–CM5_RCP4.5_022.final.csv	[1861.0, 1892, 1902, 1935, 1985, 1999, 2007, 2024, 2037, 2050, 2059, 2070, 2082, 2100.0]	14	37	4	r1i1p1	CNRM–CM5	RCP4.5	2	2059	2050	2070	100	12.5009	0.186439	100	2059	0.95	2058	0.03
363	r1i1p1_CNRM–CM5_RCP4.5_022.final.csv	[1861.0, 1892, 1902, 1935, 1985, 1999, 2007, 2024, 2037, 2050, 2059, 2070, 2082, 2100.0]	14	37	4	r1i1p1	CNRM–CM5	RCP4.5	2	2070	2059	2082	100	18.3024	0.257281	100	2070	1	0	0
364	r1i1p1_CNRM–CM5_RCP4.5_022.final.csv	[1861.0, 1892, 1902, 1935, 1985, 1999, 2007, 2024, 2037, 2050, 2059, 2070, 2082, 2100.0]	14	37	4	r1i1p1	CNRM–CM5	RCP4.5	2	2082	2070	2100	100	16.8251	0.15776	100	2082	0.84	2080	0.09
Seq	Source	BreakSet	DatasetNo	SetNo	SetNoInData	Type	Model	Treat	%BreakSet	Year	Predecessor	Successor	%SegmentFound	Ti	Shift	%YearOverall	ModalYear	ModalValue	SecondModalYear	SecondModalValue
365	r1i1p1_CSIRO–Mk3–6–0_RCP4.5_023.final.csv	[1861.0, 1914, 1940, 1960, 1996, 2015, 2034, 2050, 2065, 2077, 2100.0]	15	38	1	r1i1p1	CSIRO–Mk3–6–0	RCP4.5	100	1914	1861	1940	100	40.6956	0.291787	100	1914	0.99	1910	0.01
366	r1i1p1_CSIRO–Mk3–6–0_RCP4.5_023.final.csv	[1861.0, 1914, 1940, 1960, 1996, 2015, 2034, 2050, 2065, 2077, 2100.0]	15	38	1	r1i1p1	CSIRO–Mk3–6–0	RCP4.5	100	1940	1914	1960	100	17.148	0.140741	100	1940	0.97	1941	0.03
367	r1i1p1_CSIRO–Mk3–6–0_RCP4.5_023.final.csv	[1861.0, 1914, 1940, 1960, 1996, 2015, 2034, 2050, 2065, 2077, 2100.0]	15	38	1	r1i1p1	CSIRO–Mk3–6–0	RCP4.5	100	1960	1940	1996	100	27.1442	–0.206508570548	100	1960	1	0	0
368	r1i1p1_CSIRO–Mk3–6–0_RCP4.5_023.final.csv	[1861.0, 1914, 1940, 1960, 1996, 2015, 2034, 2050, 2065, 2077, 2100.0]	15	38	1	r1i1p1	CSIRO–Mk3–6–0	RCP4.5	100	1996	1960	2015	100	42.8428	0.477519	100	1996	1	0	0
369	r1i1p1_CSIRO–Mk3–6–0_RCP4.5_023.final.csv	[1861.0, 1914, 1940, 1960, 1996, 2015, 2034, 2050, 2065, 2077, 2100.0]	15	38	1	r1i1p1	CSIRO–Mk3–6–0	RCP4.5	100	2015	1996	2034	100	27.7082	0.425886	100	2015	0.59	2016	0.41
370	r1i1p1_CSIRO–Mk3–6–0_RCP4.5_023.final.csv	[1861.0, 1914, 1940, 1960, 1996, 2015, 2034, 2050, 2065, 2077, 2100.0]	15	38	1	r1i1p1	CSIRO–Mk3–6–0	RCP4.5	100	2034	2015	2050	100	29.2832	0.668444	100	2034	0.96	2035	0.02
371	r1i1p1_CSIRO–Mk3–6–0_RCP4.5_023.final.csv	[1861.0, 1914, 1940, 1960, 1996, 2015, 2034, 2050, 2065, 2077, 2100.0]	15	38	1	r1i1p1	CSIRO–Mk3–6–0	RCP4.5	100	2050	2034	2065	100	24.4333	0.493961	100	2050	0.82	2048	0.12
372	r1i1p1_CSIRO–Mk3–6–0_RCP4.5_023.final.csv	[1861.0, 1914, 1940, 1960, 1996, 2015, 2034, 2050, 2065, 2077, 2100.0]	15	38	1	r1i1p1	CSIRO–Mk3–6–0	RCP4.5	100	2065	2050	2077	100	15.4051	0.215531	100	2065	0.99	2066	0.01
373	r1i1p1_CSIRO–Mk3–6–0_RCP4.5_023.final.csv	[1861.0, 1914, 1940, 1960, 1996, 2015, 2034, 2050, 2065, 2077, 2100.0]	15	38	1	r1i1p1	CSIRO–Mk3–6–0	RCP4.5	100	2077	2065	2100	100	21.5377	0.195204	100	2077	0.98	2075	0.01
Seq	Source	BreakSet	DatasetNo	SetNo	SetNoInData	Type	Model	Treat	%BreakSet	Year	Predecessor	Successor	%SegmentFound	Ti	Shift	%YearOverall	ModalYear	ModalValue	SecondModalYear	SecondModalValue
374	r1i1p1_EC–EARTH_RCP4.5_033.final.csv	[1861.0, 1907, 1919, 1975, 1986, 1997, 2014, 2026, 2037, 2052, 2063, 2083, 2100.0]	16	39	1	r1i1p1	EC–EARTH	RCP4.5	84	1907	1861	1919	84	17.6139	0.17089	84	1907	0.5	1908	0.37
375	r1i1p1_EC–EARTH_RCP4.5_033.final.csv	[1861.0, 1907, 1919, 1975, 1986, 1997, 2014, 2026, 2037, 2052, 2063, 2083, 2100.0]	16	39	1	r1i1p1	EC–EARTH	RCP4.5	84	1919	1907	1975	84	31.9202	0.171436	100	1919	1	0	0
376	r1i1p1_EC–EARTH_RCP4.5_033.final.csv	[1861.0, 1907, 1919, 1975, 1986, 1997, 2014, 2026, 2037, 2052, 2063, 2083, 2100.0]	16	39	1	r1i1p1	EC–EARTH	RCP4.5	84	1975	1919	1986	100	45.3116	0.274217	100	1975	0.98	1976	0.02
377	r1i1p1_EC–EARTH_RCP4.5_033.final.csv	[1861.0, 1907, 1919, 1975, 1986, 1997, 2014, 2026, 2037, 2052, 2063, 2083, 2100.0]	16	39	1	r1i1p1	EC–EARTH	RCP4.5	84	1986	1975	1997	100	10.4346	0.178124	100	1986	0.91	1987	0.06
378	r1i1p1_EC–EARTH_RCP4.5_033.final.csv	[1861.0, 1907, 1919, 1975, 1986, 1997, 2014, 2026, 2037, 2052, 2063, 2083, 2100.0]	16	39	1	r1i1p1	EC–EARTH	RCP4.5	84	1997	1986	2014	100	20.4187	0.376585	100	1997	0.8	2000	0.19
379	r1i1p1_EC–EARTH_RCP4.5_033.final.csv	[1861.0, 1907, 1919, 1975, 1986, 1997, 2014, 2026, 2037, 2052, 2063, 2083, 2100.0]	16	39	1	r1i1p1	EC–EARTH	RCP4.5	84	2014	1997	2026	100	20.7549	0.329854	100	2014	0.89	2013	0.11
380	r1i1p1_EC–EARTH_RCP4.5_033.final.csv	[1861.0, 1907, 1919, 1975, 1986, 1997, 2014, 2026, 2037, 2052, 2063, 2083, 2100.0]	16	39	1	r1i1p1	EC–EARTH	RCP4.5	84	2026	2014	2037	100	15.8154	0.248603	100	2026	0.72	2025	0.12
381	r1i1p1_EC–EARTH_RCP4.5_033.final.csv	[1861.0, 1907, 1919, 1975, 1986, 1997, 2014, 2026, 2037, 2052, 2063, 2083, 2100.0]	16	39	1	r1i1p1	EC–EARTH	RCP4.5	84	2037	2026	2052	100	20.7711	0.32152	100	2037	0.89	2039	0.06
382	r1i1p1_EC–EARTH_RCP4.5_033.final.csv	[1861.0, 1907, 1919, 1975, 1986, 1997, 2014, 2026, 2037, 2052, 2063, 2083, 2100.0]	16	39	1	r1i1p1	EC–EARTH	RCP4.5	84	2052	2037	2063	100	15.4548	0.19141	100	2052	0.93	2053	0.06
383	r1i1p1_EC–EARTH_RCP4.5_033.final.csv	[1861.0, 1907, 1919, 1975, 1986, 1997, 2014, 2026, 2037, 2052, 2063, 2083, 2100.0]	16	39	1	r1i1p1	EC–EARTH	RCP4.5	84	2063	2052	2083	100	24.1699	0.27099	100	2063	0.99	2062	0.01
384	r1i1p1_EC–EARTH_RCP4.5_033.final.csv	[1861.0, 1907, 1919, 1975, 1986, 1997, 2014, 2026, 2037, 2052, 2063, 2083, 2100.0]	16	39	1	r1i1p1	EC–EARTH	RCP4.5	84	2083	2063	2100	100	26.5557	0.192852	100	2083	0.93	2082	0.07
385	r1i1p1_EC–EARTH_RCP4.5_033.final.csv	[1861.0, 1908, 1919, 1975, 1986, 1997, 2014, 2026, 2037, 2052, 2063, 2083, 2100.0]	16	40	2	r1i1p1	EC–EARTH	RCP4.5	16	1908	1861	1919	16	17.6139	0.17089	16	1907	0.5	1908	0.37
386	r1i1p1_EC–EARTH_RCP4.5_033.final.csv	[1861.0, 1908, 1919, 1975, 1986, 1997, 2014, 2026, 2037, 2052, 2063, 2083, 2100.0]	16	40	2	r1i1p1	EC–EARTH	RCP4.5	16	1919	1908	1975	16	29.18	0.16433	100	1919	1	0	0
387	r1i1p1_EC–EARTH_RCP4.5_033.final.csv	[1861.0, 1908, 1919, 1975, 1986, 1997, 2014, 2026, 2037, 2052, 2063, 2083, 2100.0]	16	40	2	r1i1p1	EC–EARTH	RCP4.5	16	1975	1919	1986	100	45.3116	0.274217	100	1975	0.98	1976	0.02
388	r1i1p1_EC–EARTH_RCP4.5_033.final.csv	[1861.0, 1908, 1919, 1975, 1986, 1997, 2014, 2026, 2037, 2052, 2063, 2083, 2100.0]	16	40	2	r1i1p1	EC–EARTH	RCP4.5	16	1986	1975	1997	100	10.4346	0.178124	100	1986	0.91	1987	0.06
389	r1i1p1_EC–EARTH_RCP4.5_033.final.csv	[1861.0, 1908, 1919, 1975, 1986, 1997, 2014, 2026, 2037, 2052, 2063, 2083, 2100.0]	16	40	2	r1i1p1	EC–EARTH	RCP4.5	16	1997	1986	2014	100	20.4187	0.376585	100	1997	0.8	2000	0.19
390	r1i1p1_EC–EARTH_RCP4.5_033.final.csv	[1861.0, 1908, 1919, 1975, 1986, 1997, 2014, 2026, 2037, 2052, 2063, 2083, 2100.0]	16	40	2	r1i1p1	EC–EARTH	RCP4.5	16	2014	1997	2026	100	20.7549	0.329854	100	2014	0.89	2013	0.11
391	r1i1p1_EC–EARTH_RCP4.5_033.final.csv	[1861.0, 1908, 1919, 1975, 1986, 1997, 2014, 2026, 2037, 2052, 2063, 2083, 2100.0]	16	40	2	r1i1p1	EC–EARTH	RCP4.5	16	2026	2014	2037	100	15.8154	0.248603	100	2026	0.72	2025	0.12
392	r1i1p1_EC–EARTH_RCP4.5_033.final.csv	[1861.0, 1908, 1919, 1975, 1986, 1997, 2014, 2026, 2037, 2052, 2063, 2083, 2100.0]	16	40	2	r1i1p1	EC–EARTH	RCP4.5	16	2037	2026	2052	100	20.7711	0.32152	100	2037	0.89	2039	0.06
393	r1i1p1_EC–EARTH_RCP4.5_033.final.csv	[1861.0, 1908, 1919, 1975, 1986, 1997, 2014, 2026, 2037, 2052, 2063, 2083, 2100.0]	16	40	2	r1i1p1	EC–EARTH	RCP4.5	16	2052	2037	2063	100	15.4548	0.19141	100	2052	0.93	2053	0.06
394	r1i1p1_EC–EARTH_RCP4.5_033.final.csv	[1861.0, 1908, 1919, 1975, 1986, 1997, 2014, 2026, 2037, 2052, 2063, 2083, 2100.0]	16	40	2	r1i1p1	EC–EARTH	RCP4.5	16	2063	2052	2083	100	24.1699	0.27099	100	2063	0.99	2062	0.01
395	r1i1p1_EC–EARTH_RCP4.5_033.final.csv	[1861.0, 1908, 1919, 1975, 1986, 1997, 2014, 2026, 2037, 2052, 2063, 2083, 2100.0]	16	40	2	r1i1p1	EC–EARTH	RCP4.5	16	2083	2063	2100	100	26.5557	0.192852	100	2083	0.93	2082	0.07
Seq	Source	BreakSet	DatasetNo	SetNo	SetNoInData	Type	Model	Treat	%BreakSet	Year	Predecessor	Successor	%SegmentFound	Ti	Shift	%YearOverall	ModalYear	ModalValue	SecondModalYear	SecondModalValue
396	r1i1p1_FGOALS_g2_RCP4.5_040.final.csv	[1861.0, 1927, 1964, 1977, 2000, 2015, 2024, 2035, 2049, 2065, 2100.0]	17	41	1	r1i1p1	FGOALS_g2	RCP4.5	1	1927	1861	1964	100	33.7153	0.0920123	100	1927	0.91	1943	0.08
397	r1i1p1_FGOALS_g2_RCP4.5_040.final.csv	[1861.0, 1927, 1964, 1977, 2000, 2015, 2024, 2035, 2049, 2065, 2100.0]	17	41	1	r1i1p1	FGOALS_g2	RCP4.5	1	1964	1927	1977	100	27.8843	0.167041	100	1964	0.99	1953	0.01
398	r1i1p1_FGOALS_g2_RCP4.5_040.final.csv	[1861.0, 1927, 1964, 1977, 2000, 2015, 2024, 2035, 2049, 2065, 2100.0]	17	41	1	r1i1p1	FGOALS_g2	RCP4.5	1	1977	1964	2000	23	22.8708	0.24278	100	1987	0.94	1979	0.02
399	r1i1p1_FGOALS_g2_RCP4.5_040.final.csv	[1861.0, 1927, 1964, 1977, 2000, 2015, 2024, 2035, 2049, 2065, 2100.0]	17	41	1	r1i1p1	FGOALS_g2	RCP4.5	1	2000	1977	2015	23	29.8389	0.373853	34	2000	0.56	1999	0.37
400	r1i1p1_FGOALS_g2_RCP4.5_040.final.csv	[1861.0, 1927, 1964, 1977, 2000, 2015, 2024, 2035, 2049, 2065, 2100.0]	17	41	1	r1i1p1	FGOALS_g2	RCP4.5	1	2015	2000	2024	34	19.5004	0.268453	53	2015	1	0	0
401	r1i1p1_FGOALS_g2_RCP4.5_040.final.csv	[1861.0, 1927, 1964, 1977, 2000, 2015, 2024, 2035, 2049, 2065, 2100.0]	17	41	1	r1i1p1	FGOALS_g2	RCP4.5	1	2024	2015	2035	53	15.3787	0.20955	100	2024	1	0	0
402	r1i1p1_FGOALS_g2_RCP4.5_040.final.csv	[1861.0, 1927, 1964, 1977, 2000, 2015, 2024, 2035, 2049, 2065, 2100.0]	17	41	1	r1i1p1	FGOALS_g2	RCP4.5	1	2035	2024	2049	1	20.6662	0.272523	100	2035	1	0	0
403	r1i1p1_FGOALS_g2_RCP4.5_040.final.csv	[1861.0, 1927, 1964, 1977, 2000, 2015, 2024, 2035, 2049, 2065, 2100.0]	17	41	1	r1i1p1	FGOALS_g2	RCP4.5	1	2049	2035	2065	1	16.7879	0.156211	1	2051	0.57	2049	0.41
404	r1i1p1_FGOALS_g2_RCP4.5_040.final.csv	[1861.0, 1927, 1964, 1977, 2000, 2015, 2024, 2035, 2049, 2065, 2100.0]	17	41	1	r1i1p1	FGOALS_g2	RCP4.5	1	2065	2049	2100	1	27.136	0.135684	100	2065	0.75	2064	0.24
405	r1i1p1_FGOALS_g2_RCP4.5_040.final.csv	[1861.0, 1927, 1964, 1977, 1995, 2012, 2024, 2035, 2051, 2065, 2100.0]	17	42	2	r1i1p1	FGOALS_g2	RCP4.5	47	1927	1861	1964	100	33.7153	0.0920123	100	1927	0.91	1943	0.08
406	r1i1p1_FGOALS_g2_RCP4.5_040.final.csv	[1861.0, 1927, 1964, 1977, 1995, 2012, 2024, 2035, 2051, 2065, 2100.0]	17	42	2	r1i1p1	FGOALS_g2	RCP4.5	47	1964	1927	1977	100	27.8843	0.167041	100	1964	0.99	1953	0.01
407	r1i1p1_FGOALS_g2_RCP4.5_040.final.csv	[1861.0, 1927, 1964, 1977, 1995, 2012, 2024, 2035, 2051, 2065, 2100.0]	17	42	2	r1i1p1	FGOALS_g2	RCP4.5	47	1977	1964	1995	47	20.3725	0.190724	100	1977	0.81	1978	0.16
408	r1i1p1_FGOALS_g2_RCP4.5_040.final.csv	[1861.0, 1927, 1964, 1977, 1995, 2012, 2024, 2035, 2051, 2065, 2100.0]	17	42	2	r1i1p1	FGOALS_g2	RCP4.5	47	1995	1977	2012	47	26.9916	0.337814	47	1995	0.76	1999	0.16
409	r1i1p1_FGOALS_g2_RCP4.5_040.final.csv	[1861.0, 1927, 1964, 1977, 1995, 2012, 2024, 2035, 2051, 2065, 2100.0]	17	42	2	r1i1p1	FGOALS_g2	RCP4.5	47	2012	1995	2024	47	20.1628	0.30594	47	2012	0.69	2015	0.18
410	r1i1p1_FGOALS_g2_RCP4.5_040.final.csv	[1861.0, 1927, 1964, 1977, 1995, 2012, 2024, 2035, 2051, 2065, 2100.0]	17	42	2	r1i1p1	FGOALS_g2	RCP4.5	47	2024	2012	2035	47	16.5097	0.253651	100	2024	1	0	0
411	r1i1p1_FGOALS_g2_RCP4.5_040.final.csv	[1861.0, 1927, 1964, 1977, 1995, 2012, 2024, 2035, 2051, 2065, 2100.0]	17	42	2	r1i1p1	FGOALS_g2	RCP4.5	47	2035	2024	2051	99	22.3084	0.283373	100	2035	1	0	0
412	r1i1p1_FGOALS_g2_RCP4.5_040.final.csv	[1861.0, 1927, 1964, 1977, 1995, 2012, 2024, 2035, 2051, 2065, 2100.0]	17	42	2	r1i1p1	FGOALS_g2	RCP4.5	47	2051	2035	2065	99	16.7879	0.156211	99	2051	0.57	2049	0.41
413	r1i1p1_FGOALS_g2_RCP4.5_040.final.csv	[1861.0, 1927, 1964, 1977, 1995, 2012, 2024, 2035, 2051, 2065, 2100.0]	17	42	2	r1i1p1	FGOALS_g2	RCP4.5	47	2065	2051	2100	99	24.0122	0.125184	100	2065	0.77	2064	0.16
414	r1i1p1_FGOALS_g2_RCP4.5_040.final.csv	[1861.0, 1927, 1964, 1977, 1987, 2000, 2015, 2024, 2035, 2051, 2065, 2100.0]	17	43	3	r1i1p1	FGOALS_g2	RCP4.5	11	1927	1861	1964	100	33.7153	0.0920123	100	1927	0.91	1943	0.08
415	r1i1p1_FGOALS_g2_RCP4.5_040.final.csv	[1861.0, 1927, 1964, 1977, 1987, 2000, 2015, 2024, 2035, 2051, 2065, 2100.0]	17	43	3	r1i1p1	FGOALS_g2	RCP4.5	11	1964	1927	1977	100	27.8843	0.167041	100	1964	0.99	1953	0.01
416	r1i1p1_FGOALS_g2_RCP4.5_040.final.csv	[1861.0, 1927, 1964, 1977, 1987, 2000, 2015, 2024, 2035, 2051, 2065, 2100.0]	17	43	3	r1i1p1	FGOALS_g2	RCP4.5	11	1977	1964	1987	11	14.7176	0.141473	100	1977	0.85	1975	0.14
417	r1i1p1_FGOALS_g2_RCP4.5_040.final.csv	[1861.0, 1927, 1964, 1977, 1987, 2000, 2015, 2024, 2035, 2051, 2065, 2100.0]	17	43	3	r1i1p1	FGOALS_g2	RCP4.5	11	1987	1977	2000	11	12.8117	0.199813	11	1995	0.74	1987	0.13
418	r1i1p1_FGOALS_g2_RCP4.5_040.final.csv	[1861.0, 1927, 1964, 1977, 1987, 2000, 2015, 2024, 2035, 2051, 2065, 2100.0]	17	43	3	r1i1p1	FGOALS_g2	RCP4.5	11	2000	1987	2015	11	22.2371	0.304754	34	2000	0.99	1999	0.01
419	r1i1p1_FGOALS_g2_RCP4.5_040.final.csv	[1861.0, 1927, 1964, 1977, 1987, 2000, 2015, 2024, 2035, 2051, 2065, 2100.0]	17	43	3	r1i1p1	FGOALS_g2	RCP4.5	11	2015	2000	2024	34	19.5004	0.268453	53	2015	1	0	0
420	r1i1p1_FGOALS_g2_RCP4.5_040.final.csv	[1861.0, 1927, 1964, 1977, 1987, 2000, 2015, 2024, 2035, 2051, 2065, 2100.0]	17	43	3	r1i1p1	FGOALS_g2	RCP4.5	11	2024	2015	2035	53	15.3787	0.20955	100	2024	1	0	0
421	r1i1p1_FGOALS_g2_RCP4.5_040.final.csv	[1861.0, 1927, 1964, 1977, 1987, 2000, 2015, 2024, 2035, 2051, 2065, 2100.0]	17	43	3	r1i1p1	FGOALS_g2	RCP4.5	11	2035	2024	2051	99	22.3084	0.283373	100	2035	1	0	0
422	r1i1p1_FGOALS_g2_RCP4.5_040.final.csv	[1861.0, 1927, 1964, 1977, 1987, 2000, 2015, 2024, 2035, 2051, 2065, 2100.0]	17	43	3	r1i1p1	FGOALS_g2	RCP4.5	11	2051	2035	2065	99	16.7879	0.156211	99	2051	0.57	2049	0.41
423	r1i1p1_FGOALS_g2_RCP4.5_040.final.csv	[1861.0, 1927, 1964, 1977, 1987, 2000, 2015, 2024, 2035, 2051, 2065, 2100.0]	17	43	3	r1i1p1	FGOALS_g2	RCP4.5	11	2065	2051	2100	99	24.0122	0.125184	100	2065	0.77	2064	0.16
424	r1i1p1_FGOALS_g2_RCP4.5_040.final.csv	[1861.0, 1927, 1964, 1977, 2000, 2015, 2024, 2035, 2051, 2065, 2100.0]	17	44	4	r1i1p1	FGOALS_g2	RCP4.5	22	1927	1861	1964	100	33.7153	0.0920123	100	1927	0.91	1943	0.08
425	r1i1p1_FGOALS_g2_RCP4.5_040.final.csv	[1861.0, 1927, 1964, 1977, 2000, 2015, 2024, 2035, 2051, 2065, 2100.0]	17	44	4	r1i1p1	FGOALS_g2	RCP4.5	22	1964	1927	1977	100	27.8843	0.167041	100	1964	0.99	1953	0.01
426	r1i1p1_FGOALS_g2_RCP4.5_040.final.csv	[1861.0, 1927, 1964, 1977, 2000, 2015, 2024, 2035, 2051, 2065, 2100.0]	17	44	4	r1i1p1	FGOALS_g2	RCP4.5	22	1977	1964	2000	23	22.8708	0.24278	100	1987	0.94	1979	0.02
427	r1i1p1_FGOALS_g2_RCP4.5_040.final.csv	[1861.0, 1927, 1964, 1977, 2000, 2015, 2024, 2035, 2051, 2065, 2100.0]	17	44	4	r1i1p1	FGOALS_g2	RCP4.5	22	2000	1977	2015	23	29.8389	0.373853	34	2000	0.56	1999	0.37
428	r1i1p1_FGOALS_g2_RCP4.5_040.final.csv	[1861.0, 1927, 1964, 1977, 2000, 2015, 2024, 2035, 2051, 2065, 2100.0]	17	44	4	r1i1p1	FGOALS_g2	RCP4.5	22	2015	2000	2024	34	19.5004	0.268453	53	2015	1	0	0
429	r1i1p1_FGOALS_g2_RCP4.5_040.final.csv	[1861.0, 1927, 1964, 1977, 2000, 2015, 2024, 2035, 2051, 2065, 2100.0]	17	44	4	r1i1p1	FGOALS_g2	RCP4.5	22	2024	2015	2035	53	15.3787	0.20955	100	2024	1	0	0
430	r1i1p1_FGOALS_g2_RCP4.5_040.final.csv	[1861.0, 1927, 1964, 1977, 2000, 2015, 2024, 2035, 2051, 2065, 2100.0]	17	44	4	r1i1p1	FGOALS_g2	RCP4.5	22	2035	2024	2051	99	22.3084	0.283373	100	2035	1	0	0
431	r1i1p1_FGOALS_g2_RCP4.5_040.final.csv	[1861.0, 1927, 1964, 1977, 2000, 2015, 2024, 2035, 2051, 2065, 2100.0]	17	44	4	r1i1p1	FGOALS_g2	RCP4.5	22	2051	2035	2065	99	16.7879	0.156211	99	2051	0.57	2049	0.41
432	r1i1p1_FGOALS_g2_RCP4.5_040.final.csv	[1861.0, 1927, 1964, 1977, 2000, 2015, 2024, 2035, 2051, 2065, 2100.0]	17	44	4	r1i1p1	FGOALS_g2	RCP4.5	22	2065	2051	2100	99	24.0122	0.125184	100	2065	0.77	2064	0.16
433	r1i1p1_FGOALS_g2_RCP4.5_040.final.csv	[1861.0, 1927, 1964, 1977, 1999, 2015, 2024, 2035, 2051, 2065, 2100.0]	17	45	5	r1i1p1	FGOALS_g2	RCP4.5	19	1927	1861	1964	100	33.7153	0.0920123	100	1927	0.91	1943	0.08
434	r1i1p1_FGOALS_g2_RCP4.5_040.final.csv	[1861.0, 1927, 1964, 1977, 1999, 2015, 2024, 2035, 2051, 2065, 2100.0]	17	45	5	r1i1p1	FGOALS_g2	RCP4.5	19	1964	1927	1977	100	27.8843	0.167041	100	1964	0.99	1953	0.01
435	r1i1p1_FGOALS_g2_RCP4.5_040.final.csv	[1861.0, 1927, 1964, 1977, 1999, 2015, 2024, 2035, 2051, 2065, 2100.0]	17	45	5	r1i1p1	FGOALS_g2	RCP4.5	19	1977	1964	1999	19	21.821	0.234493	100	1987	0.77	1979	0.09
436	r1i1p1_FGOALS_g2_RCP4.5_040.final.csv	[1861.0, 1927, 1964, 1977, 1999, 2015, 2024, 2035, 2051, 2065, 2100.0]	17	45	5	r1i1p1	FGOALS_g2	RCP4.5	19	1999	1977	2015	19	29.8389	0.373853	19	2000	0.56	1999	0.37
437	r1i1p1_FGOALS_g2_RCP4.5_040.final.csv	[1861.0, 1927, 1964, 1977, 1999, 2015, 2024, 2035, 2051, 2065, 2100.0]	17	45	5	r1i1p1	FGOALS_g2	RCP4.5	19	2015	1999	2024	19	19.4257	0.282037	53	2015	0.97	2012	0.02
438	r1i1p1_FGOALS_g2_RCP4.5_040.final.csv	[1861.0, 1927, 1964, 1977, 1999, 2015, 2024, 2035, 2051, 2065, 2100.0]	17	45	5	r1i1p1	FGOALS_g2	RCP4.5	19	2024	2015	2035	53	15.3787	0.20955	100	2024	1	0	0
439	r1i1p1_FGOALS_g2_RCP4.5_040.final.csv	[1861.0, 1927, 1964, 1977, 1999, 2015, 2024, 2035, 2051, 2065, 2100.0]	17	45	5	r1i1p1	FGOALS_g2	RCP4.5	19	2035	2024	2051	99	22.3084	0.283373	100	2035	1	0	0
440	r1i1p1_FGOALS_g2_RCP4.5_040.final.csv	[1861.0, 1927, 1964, 1977, 1999, 2015, 2024, 2035, 2051, 2065, 2100.0]	17	45	5	r1i1p1	FGOALS_g2	RCP4.5	19	2051	2035	2065	99	16.7879	0.156211	99	2051	0.57	2049	0.41
441	r1i1p1_FGOALS_g2_RCP4.5_040.final.csv	[1861.0, 1927, 1964, 1977, 1999, 2015, 2024, 2035, 2051, 2065, 2100.0]	17	45	5	r1i1p1	FGOALS_g2	RCP4.5	19	2065	2051	2100	99	24.0122	0.125184	100	2065	0.77	2064	0.16
Seq	Source	BreakSet	DatasetNo	SetNo	SetNoInData	Type	Model	Treat	%BreakSet	Year	Predecessor	Successor	%SegmentFound	Ti	Shift	%YearOverall	ModalYear	ModalValue	SecondModalYear	SecondModalValue
442	r1i1p1_FIO–ESM_RCP4.5_041.final.csv	[1861.0, 1916, 1970, 1986, 1993, 2009, 2022, 2034, 2061, 2100.0]	18	46	1	r1i1p1	FIO–ESM	RCP4.5	100	1916	1861	1970	100	50.3433	0.20848	100	1916	0.74	1915	0.26
443	r1i1p1_FIO–ESM_RCP4.5_041.final.csv	[1861.0, 1916, 1970, 1986, 1993, 2009, 2022, 2034, 2061, 2100.0]	18	46	1	r1i1p1	FIO–ESM	RCP4.5	100	1970	1916	1986	100	37.8304	0.27836	100	1970	0.99	1971	0.01
444	r1i1p1_FIO–ESM_RCP4.5_041.final.csv	[1861.0, 1916, 1970, 1986, 1993, 2009, 2022, 2034, 2061, 2100.0]	18	46	1	r1i1p1	FIO–ESM	RCP4.5	100	1986	1970	1993	100	11.8275	0.241553	100	1986	0.73	1985	0.25
445	r1i1p1_FIO–ESM_RCP4.5_041.final.csv	[1861.0, 1916, 1970, 1986, 1993, 2009, 2022, 2034, 2061, 2100.0]	18	46	1	r1i1p1	FIO–ESM	RCP4.5	100	1993	1986	2009	100	10.6644	0.220854	100	1993	0.84	1997	0.15
446	r1i1p1_FIO–ESM_RCP4.5_041.final.csv	[1861.0, 1916, 1970, 1986, 1993, 2009, 2022, 2034, 2061, 2100.0]	18	46	1	r1i1p1	FIO–ESM	RCP4.5	100	2009	1993	2022	100	15.0252	0.231383	100	2009	0.98	2008	0.01
447	r1i1p1_FIO–ESM_RCP4.5_041.final.csv	[1861.0, 1916, 1970, 1986, 1993, 2009, 2022, 2034, 2061, 2100.0]	18	46	1	r1i1p1	FIO–ESM	RCP4.5	100	2022	2009	2034	100	13.5956	0.225655	100	2022	0.97	2019	0.01
448	r1i1p1_FIO–ESM_RCP4.5_041.final.csv	[1861.0, 1916, 1970, 1986, 1993, 2009, 2022, 2034, 2061, 2100.0]	18	46	1	r1i1p1	FIO–ESM	RCP4.5	100	2034	2022	2061	100	17.9663	0.235704	100	2034	0.51	2036	0.39
449	r1i1p1_FIO–ESM_RCP4.5_041.final.csv	[1861.0, 1916, 1970, 1986, 1993, 2009, 2022, 2034, 2061, 2100.0]	18	46	1	r1i1p1	FIO–ESM	RCP4.5	100	2061	2034	2100	100	24.6783	0.185831	100	2061	0.65	2052	0.24
Seq	Source	BreakSet	DatasetNo	SetNo	SetNoInData	Type	Model	Treat	%BreakSet	Year	Predecessor	Successor	%SegmentFound	Ti	Shift	%YearOverall	ModalYear	ModalValue	SecondModalYear	SecondModalValue
450	r1i1p1_GFDL–CM3_RCP4.5_044.final.csv	[1861.0, 1868, 1883, 1919, 1933, 1962, 1977, 1996, 2008, 2021, 2036, 2050, 2066, 2082, 2100.0]	19	47	1	r1i1p1	GFDL–CM3	RCP4.5	24	1868	1861	1883	25	11.4855	0.201883	25	1868	0.39	1867	0.38
451	r1i1p1_GFDL–CM3_RCP4.5_044.final.csv	[1861.0, 1868, 1883, 1919, 1933, 1962, 1977, 1996, 2008, 2021, 2036, 2050, 2066, 2082, 2100.0]	19	47	1	r1i1p1	GFDL–CM3	RCP4.5	24	1883	1868	1919	25	28.8833	–0.305504598081	100	1883	1	0	0
452	r1i1p1_GFDL–CM3_RCP4.5_044.final.csv	[1861.0, 1868, 1883, 1919, 1933, 1962, 1977, 1996, 2008, 2021, 2036, 2050, 2066, 2082, 2100.0]	19	47	1	r1i1p1	GFDL–CM3	RCP4.5	24	1919	1883	1933	100	20.3244	0.214707	100	1919	1	0	0
453	r1i1p1_GFDL–CM3_RCP4.5_044.final.csv	[1861.0, 1868, 1883, 1919, 1933, 1962, 1977, 1996, 2008, 2021, 2036, 2050, 2066, 2082, 2100.0]	19	47	1	r1i1p1	GFDL–CM3	RCP4.5	24	1933	1919	1962	100	12.4294	0.14032	100	1933	0.65	1934	0.22
454	r1i1p1_GFDL–CM3_RCP4.5_044.final.csv	[1861.0, 1868, 1883, 1919, 1933, 1962, 1977, 1996, 2008, 2021, 2036, 2050, 2066, 2082, 2100.0]	19	47	1	r1i1p1	GFDL–CM3	RCP4.5	24	1962	1933	1977	100	32.5264	–0.442292675557	100	1962	0.91	1961	0.09
455	r1i1p1_GFDL–CM3_RCP4.5_044.final.csv	[1861.0, 1868, 1883, 1919, 1933, 1962, 1977, 1996, 2008, 2021, 2036, 2050, 2066, 2082, 2100.0]	19	47	1	r1i1p1	GFDL–CM3	RCP4.5	24	1977	1962	1996	100	22.9497	0.395995	100	1977	1	0	0
456	r1i1p1_GFDL–CM3_RCP4.5_044.final.csv	[1861.0, 1868, 1883, 1919, 1933, 1962, 1977, 1996, 2008, 2021, 2036, 2050, 2066, 2082, 2100.0]	19	47	1	r1i1p1	GFDL–CM3	RCP4.5	24	1996	1977	2008	100	22.7838	0.496362	100	1996	0.96	1995	0.02
457	r1i1p1_GFDL–CM3_RCP4.5_044.final.csv	[1861.0, 1868, 1883, 1919, 1933, 1962, 1977, 1996, 2008, 2021, 2036, 2050, 2066, 2082, 2100.0]	19	47	1	r1i1p1	GFDL–CM3	RCP4.5	24	2008	1996	2021	100	18.6045	0.523297	100	2008	0.96	2009	0.02
458	r1i1p1_GFDL–CM3_RCP4.5_044.final.csv	[1861.0, 1868, 1883, 1919, 1933, 1962, 1977, 1996, 2008, 2021, 2036, 2050, 2066, 2082, 2100.0]	19	47	1	r1i1p1	GFDL–CM3	RCP4.5	24	2021	2008	2036	100	21.1062	0.522437	100	2021	0.95	2022	0.03
459	r1i1p1_GFDL–CM3_RCP4.5_044.final.csv	[1861.0, 1868, 1883, 1919, 1933, 1962, 1977, 1996, 2008, 2021, 2036, 2050, 2066, 2082, 2100.0]	19	47	1	r1i1p1	GFDL–CM3	RCP4.5	24	2036	2021	2050	100	21.5108	0.521385	100	2036	0.65	2039	0.23
460	r1i1p1_GFDL–CM3_RCP4.5_044.final.csv	[1861.0, 1868, 1883, 1919, 1933, 1962, 1977, 1996, 2008, 2021, 2036, 2050, 2066, 2082, 2100.0]	19	47	1	r1i1p1	GFDL–CM3	RCP4.5	24	2050	2036	2066	97	20.3213	0.402515	100	2050	0.77	2052	0.13
461	r1i1p1_GFDL–CM3_RCP4.5_044.final.csv	[1861.0, 1868, 1883, 1919, 1933, 1962, 1977, 1996, 2008, 2021, 2036, 2050, 2066, 2082, 2100.0]	19	47	1	r1i1p1	GFDL–CM3	RCP4.5	24	2066	2050	2082	97	20.1475	0.29985	97	2066	0.69	2065	0.31
462	r1i1p1_GFDL–CM3_RCP4.5_044.final.csv	[1861.0, 1868, 1883, 1919, 1933, 1962, 1977, 1996, 2008, 2021, 2036, 2050, 2066, 2082, 2100.0]	19	47	1	r1i1p1	GFDL–CM3	RCP4.5	24	2082	2066	2100	97	17.4973	0.237357	100	2082	0.79	2085	0.18
463	r1i1p1_GFDL–CM3_RCP4.5_044.final.csv	[1861.0, 1867, 1883, 1919, 1933, 1962, 1977, 1996, 2008, 2021, 2036, 2050, 2066, 2082, 2100.0]	19	48	2	r1i1p1	GFDL–CM3	RCP4.5	66	1867	1861	1883	68	11.4855	0.201883	68	1868	0.39	1867	0.38
464	r1i1p1_GFDL–CM3_RCP4.5_044.final.csv	[1861.0, 1867, 1883, 1919, 1933, 1962, 1977, 1996, 2008, 2021, 2036, 2050, 2066, 2082, 2100.0]	19	48	2	r1i1p1	GFDL–CM3	RCP4.5	66	1883	1867	1919	68	29.2796	–0.299376866998	100	1883	1	0	0
465	r1i1p1_GFDL–CM3_RCP4.5_044.final.csv	[1861.0, 1867, 1883, 1919, 1933, 1962, 1977, 1996, 2008, 2021, 2036, 2050, 2066, 2082, 2100.0]	19	48	2	r1i1p1	GFDL–CM3	RCP4.5	66	1919	1883	1933	100	20.3244	0.214707	100	1919	1	0	0
466	r1i1p1_GFDL–CM3_RCP4.5_044.final.csv	[1861.0, 1867, 1883, 1919, 1933, 1962, 1977, 1996, 2008, 2021, 2036, 2050, 2066, 2082, 2100.0]	19	48	2	r1i1p1	GFDL–CM3	RCP4.5	66	1933	1919	1962	100	12.4294	0.14032	100	1933	0.65	1934	0.22
467	r1i1p1_GFDL–CM3_RCP4.5_044.final.csv	[1861.0, 1867, 1883, 1919, 1933, 1962, 1977, 1996, 2008, 2021, 2036, 2050, 2066, 2082, 2100.0]	19	48	2	r1i1p1	GFDL–CM3	RCP4.5	66	1962	1933	1977	100	32.5264	–0.442292675557	100	1962	0.91	1961	0.09
468	r1i1p1_GFDL–CM3_RCP4.5_044.final.csv	[1861.0, 1867, 1883, 1919, 1933, 1962, 1977, 1996, 2008, 2021, 2036, 2050, 2066, 2082, 2100.0]	19	48	2	r1i1p1	GFDL–CM3	RCP4.5	66	1977	1962	1996	100	22.9497	0.395995	100	1977	1	0	0
469	r1i1p1_GFDL–CM3_RCP4.5_044.final.csv	[1861.0, 1867, 1883, 1919, 1933, 1962, 1977, 1996, 2008, 2021, 2036, 2050, 2066, 2082, 2100.0]	19	48	2	r1i1p1	GFDL–CM3	RCP4.5	66	1996	1977	2008	100	22.7838	0.496362	100	1996	0.96	1995	0.02
470	r1i1p1_GFDL–CM3_RCP4.5_044.final.csv	[1861.0, 1867, 1883, 1919, 1933, 1962, 1977, 1996, 2008, 2021, 2036, 2050, 2066, 2082, 2100.0]	19	48	2	r1i1p1	GFDL–CM3	RCP4.5	66	2008	1996	2021	100	18.6045	0.523297	100	2008	0.96	2009	0.02
471	r1i1p1_GFDL–CM3_RCP4.5_044.final.csv	[1861.0, 1867, 1883, 1919, 1933, 1962, 1977, 1996, 2008, 2021, 2036, 2050, 2066, 2082, 2100.0]	19	48	2	r1i1p1	GFDL–CM3	RCP4.5	66	2021	2008	2036	100	21.1062	0.522437	100	2021	0.95	2022	0.03
472	r1i1p1_GFDL–CM3_RCP4.5_044.final.csv	[1861.0, 1867, 1883, 1919, 1933, 1962, 1977, 1996, 2008, 2021, 2036, 2050, 2066, 2082, 2100.0]	19	48	2	r1i1p1	GFDL–CM3	RCP4.5	66	2036	2021	2050	100	21.5108	0.521385	100	2036	0.65	2039	0.23
473	r1i1p1_GFDL–CM3_RCP4.5_044.final.csv	[1861.0, 1867, 1883, 1919, 1933, 1962, 1977, 1996, 2008, 2021, 2036, 2050, 2066, 2082, 2100.0]	19	48	2	r1i1p1	GFDL–CM3	RCP4.5	66	2050	2036	2066	97	20.3213	0.402515	100	2050	0.77	2052	0.13
474	r1i1p1_GFDL–CM3_RCP4.5_044.final.csv	[1861.0, 1867, 1883, 1919, 1933, 1962, 1977, 1996, 2008, 2021, 2036, 2050, 2066, 2082, 2100.0]	19	48	2	r1i1p1	GFDL–CM3	RCP4.5	66	2066	2050	2082	97	20.1475	0.29985	97	2066	0.69	2065	0.31
475	r1i1p1_GFDL–CM3_RCP4.5_044.final.csv	[1861.0, 1867, 1883, 1919, 1933, 1962, 1977, 1996, 2008, 2021, 2036, 2050, 2066, 2082, 2100.0]	19	48	2	r1i1p1	GFDL–CM3	RCP4.5	66	2082	2066	2100	97	17.4973	0.237357	100	2082	0.79	2085	0.18
476	r1i1p1_GFDL–CM3_RCP4.5_044.final.csv	[1861.0, 1867, 1883, 1919, 1933, 1962, 1977, 1996, 2008, 2021, 2036, 2050, 2065, 2082, 2100.0]	19	49	3	r1i1p1	GFDL–CM3	RCP4.5	2	1867	1861	1883	68	11.4855	0.201883	68	1868	0.39	1867	0.38
477	r1i1p1_GFDL–CM3_RCP4.5_044.final.csv	[1861.0, 1867, 1883, 1919, 1933, 1962, 1977, 1996, 2008, 2021, 2036, 2050, 2065, 2082, 2100.0]	19	49	3	r1i1p1	GFDL–CM3	RCP4.5	2	1883	1867	1919	68	29.2796	–0.299376866998	100	1883	1	0	0
478	r1i1p1_GFDL–CM3_RCP4.5_044.final.csv	[1861.0, 1867, 1883, 1919, 1933, 1962, 1977, 1996, 2008, 2021, 2036, 2050, 2065, 2082, 2100.0]	19	49	3	r1i1p1	GFDL–CM3	RCP4.5	2	1919	1883	1933	100	20.3244	0.214707	100	1919	1	0	0
479	r1i1p1_GFDL–CM3_RCP4.5_044.final.csv	[1861.0, 1867, 1883, 1919, 1933, 1962, 1977, 1996, 2008, 2021, 2036, 2050, 2065, 2082, 2100.0]	19	49	3	r1i1p1	GFDL–CM3	RCP4.5	2	1933	1919	1962	100	12.4294	0.14032	100	1933	0.65	1934	0.22
480	r1i1p1_GFDL–CM3_RCP4.5_044.final.csv	[1861.0, 1867, 1883, 1919, 1933, 1962, 1977, 1996, 2008, 2021, 2036, 2050, 2065, 2082, 2100.0]	19	49	3	r1i1p1	GFDL–CM3	RCP4.5	2	1962	1933	1977	100	32.5264	–0.442292675557	100	1962	0.91	1961	0.09
481	r1i1p1_GFDL–CM3_RCP4.5_044.final.csv	[1861.0, 1867, 1883, 1919, 1933, 1962, 1977, 1996, 2008, 2021, 2036, 2050, 2065, 2082, 2100.0]	19	49	3	r1i1p1	GFDL–CM3	RCP4.5	2	1977	1962	1996	100	22.9497	0.395995	100	1977	1	0	0
482	r1i1p1_GFDL–CM3_RCP4.5_044.final.csv	[1861.0, 1867, 1883, 1919, 1933, 1962, 1977, 1996, 2008, 2021, 2036, 2050, 2065, 2082, 2100.0]	19	49	3	r1i1p1	GFDL–CM3	RCP4.5	2	1996	1977	2008	100	22.7838	0.496362	100	1996	0.96	1995	0.02
483	r1i1p1_GFDL–CM3_RCP4.5_044.final.csv	[1861.0, 1867, 1883, 1919, 1933, 1962, 1977, 1996, 2008, 2021, 2036, 2050, 2065, 2082, 2100.0]	19	49	3	r1i1p1	GFDL–CM3	RCP4.5	2	2008	1996	2021	100	18.6045	0.523297	100	2008	0.96	2009	0.02
484	r1i1p1_GFDL–CM3_RCP4.5_044.final.csv	[1861.0, 1867, 1883, 1919, 1933, 1962, 1977, 1996, 2008, 2021, 2036, 2050, 2065, 2082, 2100.0]	19	49	3	r1i1p1	GFDL–CM3	RCP4.5	2	2021	2008	2036	100	21.1062	0.522437	100	2021	0.95	2022	0.03
485	r1i1p1_GFDL–CM3_RCP4.5_044.final.csv	[1861.0, 1867, 1883, 1919, 1933, 1962, 1977, 1996, 2008, 2021, 2036, 2050, 2065, 2082, 2100.0]	19	49	3	r1i1p1	GFDL–CM3	RCP4.5	2	2036	2021	2050	100	21.5108	0.521385	100	2036	0.65	2039	0.23
486	r1i1p1_GFDL–CM3_RCP4.5_044.final.csv	[1861.0, 1867, 1883, 1919, 1933, 1962, 1977, 1996, 2008, 2021, 2036, 2050, 2065, 2082, 2100.0]	19	49	3	r1i1p1	GFDL–CM3	RCP4.5	2	2050	2036	2065	3	19.319	0.390189	100	2050	0.82	2052	0.15
487	r1i1p1_GFDL–CM3_RCP4.5_044.final.csv	[1861.0, 1867, 1883, 1919, 1933, 1962, 1977, 1996, 2008, 2021, 2036, 2050, 2065, 2082, 2100.0]	19	49	3	r1i1p1	GFDL–CM3	RCP4.5	2	2065	2050	2082	3	20.1475	0.29985	3	2066	0.69	2065	0.31
488	r1i1p1_GFDL–CM3_RCP4.5_044.final.csv	[1861.0, 1867, 1883, 1919, 1933, 1962, 1977, 1996, 2008, 2021, 2036, 2050, 2065, 2082, 2100.0]	19	49	3	r1i1p1	GFDL–CM3	RCP4.5	2	2082	2065	2100	3	18.4082	0.247494	100	2082	0.83	2085	0.14
489	r1i1p1_GFDL–CM3_RCP4.5_044.final.csv	[1861.0, 1883, 1919, 1933, 1962, 1977, 1996, 2008, 2021, 2036, 2050, 2066, 2082, 2100.0]	19	50	4	r1i1p1	GFDL–CM3	RCP4.5	7	1883	1861	1919	7	25.5435	–0.236562592364	100	1883	1	0	0
490	r1i1p1_GFDL–CM3_RCP4.5_044.final.csv	[1861.0, 1883, 1919, 1933, 1962, 1977, 1996, 2008, 2021, 2036, 2050, 2066, 2082, 2100.0]	19	50	4	r1i1p1	GFDL–CM3	RCP4.5	7	1919	1883	1933	100	20.3244	0.214707	100	1919	1	0	0
491	r1i1p1_GFDL–CM3_RCP4.5_044.final.csv	[1861.0, 1883, 1919, 1933, 1962, 1977, 1996, 2008, 2021, 2036, 2050, 2066, 2082, 2100.0]	19	50	4	r1i1p1	GFDL–CM3	RCP4.5	7	1933	1919	1962	100	12.4294	0.14032	100	1933	0.65	1934	0.22
492	r1i1p1_GFDL–CM3_RCP4.5_044.final.csv	[1861.0, 1883, 1919, 1933, 1962, 1977, 1996, 2008, 2021, 2036, 2050, 2066, 2082, 2100.0]	19	50	4	r1i1p1	GFDL–CM3	RCP4.5	7	1962	1933	1977	100	32.5264	–0.442292675557	100	1962	0.91	1961	0.09
493	r1i1p1_GFDL–CM3_RCP4.5_044.final.csv	[1861.0, 1883, 1919, 1933, 1962, 1977, 1996, 2008, 2021, 2036, 2050, 2066, 2082, 2100.0]	19	50	4	r1i1p1	GFDL–CM3	RCP4.5	7	1977	1962	1996	100	22.9497	0.395995	100	1977	1	0	0
494	r1i1p1_GFDL–CM3_RCP4.5_044.final.csv	[1861.0, 1883, 1919, 1933, 1962, 1977, 1996, 2008, 2021, 2036, 2050, 2066, 2082, 2100.0]	19	50	4	r1i1p1	GFDL–CM3	RCP4.5	7	1996	1977	2008	100	22.7838	0.496362	100	1996	0.96	1995	0.02
495	r1i1p1_GFDL–CM3_RCP4.5_044.final.csv	[1861.0, 1883, 1919, 1933, 1962, 1977, 1996, 2008, 2021, 2036, 2050, 2066, 2082, 2100.0]	19	50	4	r1i1p1	GFDL–CM3	RCP4.5	7	2008	1996	2021	100	18.6045	0.523297	100	2008	0.96	2009	0.02
496	r1i1p1_GFDL–CM3_RCP4.5_044.final.csv	[1861.0, 1883, 1919, 1933, 1962, 1977, 1996, 2008, 2021, 2036, 2050, 2066, 2082, 2100.0]	19	50	4	r1i1p1	GFDL–CM3	RCP4.5	7	2021	2008	2036	100	21.1062	0.522437	100	2021	0.95	2022	0.03
497	r1i1p1_GFDL–CM3_RCP4.5_044.final.csv	[1861.0, 1883, 1919, 1933, 1962, 1977, 1996, 2008, 2021, 2036, 2050, 2066, 2082, 2100.0]	19	50	4	r1i1p1	GFDL–CM3	RCP4.5	7	2036	2021	2050	100	21.5108	0.521385	100	2036	0.65	2039	0.23
498	r1i1p1_GFDL–CM3_RCP4.5_044.final.csv	[1861.0, 1883, 1919, 1933, 1962, 1977, 1996, 2008, 2021, 2036, 2050, 2066, 2082, 2100.0]	19	50	4	r1i1p1	GFDL–CM3	RCP4.5	7	2050	2036	2066	97	20.3213	0.402515	100	2050	0.77	2052	0.13
499	r1i1p1_GFDL–CM3_RCP4.5_044.final.csv	[1861.0, 1883, 1919, 1933, 1962, 1977, 1996, 2008, 2021, 2036, 2050, 2066, 2082, 2100.0]	19	50	4	r1i1p1	GFDL–CM3	RCP4.5	7	2066	2050	2082	97	20.1475	0.29985	97	2066	0.69	2065	0.31
500	r1i1p1_GFDL–CM3_RCP4.5_044.final.csv	[1861.0, 1883, 1919, 1933, 1962, 1977, 1996, 2008, 2021, 2036, 2050, 2066, 2082, 2100.0]	19	50	4	r1i1p1	GFDL–CM3	RCP4.5	7	2082	2066	2100	97	17.4973	0.237357	100	2082	0.79	2085	0.18
501	r1i1p1_GFDL–CM3_RCP4.5_044.final.csv	[1861.0, 1868, 1883, 1919, 1933, 1962, 1977, 1996, 2008, 2021, 2036, 2050, 2065, 2082, 2100.0]	19	51	5	r1i1p1	GFDL–CM3	RCP4.5	1	1868	1861	1883	25	11.4855	0.201883	25	1868	0.39	1867	0.38
502	r1i1p1_GFDL–CM3_RCP4.5_044.final.csv	[1861.0, 1868, 1883, 1919, 1933, 1962, 1977, 1996, 2008, 2021, 2036, 2050, 2065, 2082, 2100.0]	19	51	5	r1i1p1	GFDL–CM3	RCP4.5	1	1883	1868	1919	25	28.8833	–0.305504598081	100	1883	1	0	0
503	r1i1p1_GFDL–CM3_RCP4.5_044.final.csv	[1861.0, 1868, 1883, 1919, 1933, 1962, 1977, 1996, 2008, 2021, 2036, 2050, 2065, 2082, 2100.0]	19	51	5	r1i1p1	GFDL–CM3	RCP4.5	1	1919	1883	1933	100	20.3244	0.214707	100	1919	1	0	0
504	r1i1p1_GFDL–CM3_RCP4.5_044.final.csv	[1861.0, 1868, 1883, 1919, 1933, 1962, 1977, 1996, 2008, 2021, 2036, 2050, 2065, 2082, 2100.0]	19	51	5	r1i1p1	GFDL–CM3	RCP4.5	1	1933	1919	1962	100	12.4294	0.14032	100	1933	0.65	1934	0.22
505	r1i1p1_GFDL–CM3_RCP4.5_044.final.csv	[1861.0, 1868, 1883, 1919, 1933, 1962, 1977, 1996, 2008, 2021, 2036, 2050, 2065, 2082, 2100.0]	19	51	5	r1i1p1	GFDL–CM3	RCP4.5	1	1962	1933	1977	100	32.5264	–0.442292675557	100	1962	0.91	1961	0.09
506	r1i1p1_GFDL–CM3_RCP4.5_044.final.csv	[1861.0, 1868, 1883, 1919, 1933, 1962, 1977, 1996, 2008, 2021, 2036, 2050, 2065, 2082, 2100.0]	19	51	5	r1i1p1	GFDL–CM3	RCP4.5	1	1977	1962	1996	100	22.9497	0.395995	100	1977	1	0	0
507	r1i1p1_GFDL–CM3_RCP4.5_044.final.csv	[1861.0, 1868, 1883, 1919, 1933, 1962, 1977, 1996, 2008, 2021, 2036, 2050, 2065, 2082, 2100.0]	19	51	5	r1i1p1	GFDL–CM3	RCP4.5	1	1996	1977	2008	100	22.7838	0.496362	100	1996	0.96	1995	0.02
508	r1i1p1_GFDL–CM3_RCP4.5_044.final.csv	[1861.0, 1868, 1883, 1919, 1933, 1962, 1977, 1996, 2008, 2021, 2036, 2050, 2065, 2082, 2100.0]	19	51	5	r1i1p1	GFDL–CM3	RCP4.5	1	2008	1996	2021	100	18.6045	0.523297	100	2008	0.96	2009	0.02
509	r1i1p1_GFDL–CM3_RCP4.5_044.final.csv	[1861.0, 1868, 1883, 1919, 1933, 1962, 1977, 1996, 2008, 2021, 2036, 2050, 2065, 2082, 2100.0]	19	51	5	r1i1p1	GFDL–CM3	RCP4.5	1	2021	2008	2036	100	21.1062	0.522437	100	2021	0.95	2022	0.03
510	r1i1p1_GFDL–CM3_RCP4.5_044.final.csv	[1861.0, 1868, 1883, 1919, 1933, 1962, 1977, 1996, 2008, 2021, 2036, 2050, 2065, 2082, 2100.0]	19	51	5	r1i1p1	GFDL–CM3	RCP4.5	1	2036	2021	2050	100	21.5108	0.521385	100	2036	0.65	2039	0.23
511	r1i1p1_GFDL–CM3_RCP4.5_044.final.csv	[1861.0, 1868, 1883, 1919, 1933, 1962, 1977, 1996, 2008, 2021, 2036, 2050, 2065, 2082, 2100.0]	19	51	5	r1i1p1	GFDL–CM3	RCP4.5	1	2050	2036	2065	3	19.319	0.390189	100	2050	0.82	2052	0.15
512	r1i1p1_GFDL–CM3_RCP4.5_044.final.csv	[1861.0, 1868, 1883, 1919, 1933, 1962, 1977, 1996, 2008, 2021, 2036, 2050, 2065, 2082, 2100.0]	19	51	5	r1i1p1	GFDL–CM3	RCP4.5	1	2065	2050	2082	3	20.1475	0.29985	3	2066	0.69	2065	0.31
513	r1i1p1_GFDL–CM3_RCP4.5_044.final.csv	[1861.0, 1868, 1883, 1919, 1933, 1962, 1977, 1996, 2008, 2021, 2036, 2050, 2065, 2082, 2100.0]	19	51	5	r1i1p1	GFDL–CM3	RCP4.5	1	2082	2065	2100	3	18.4082	0.247494	100	2082	0.83	2085	0.14
Seq	Source	BreakSet	DatasetNo	SetNo	SetNoInData	Type	Model	Treat	%BreakSet	Year	Predecessor	Successor	%SegmentFound	Ti	Shift	%YearOverall	ModalYear	ModalValue	SecondModalYear	SecondModalValue
514	r1i1p1_GFDL–ESM2G_RCP4.5_045.final.csv	[1861.0, 1914, 1930, 1984, 1996, 2022, 2045, 2100.0]	20	52	1	r1i1p1	GFDL–ESM2G	RCP4.5	100	1914	1861	1930	100	31.0988	0.316576	100	1914	1	0	0
515	r1i1p1_GFDL–ESM2G_RCP4.5_045.final.csv	[1861.0, 1914, 1930, 1984, 1996, 2022, 2045, 2100.0]	20	52	1	r1i1p1	GFDL–ESM2G	RCP4.5	100	1930	1914	1984	100	18.2186	–0.172181800166	100	1930	0.74	1942	0.23
516	r1i1p1_GFDL–ESM2G_RCP4.5_045.final.csv	[1861.0, 1914, 1930, 1984, 1996, 2022, 2045, 2100.0]	20	52	1	r1i1p1	GFDL–ESM2G	RCP4.5	100	1984	1930	1996	100	32.0894	0.320937	100	1984	1	0	0
517	r1i1p1_GFDL–ESM2G_RCP4.5_045.final.csv	[1861.0, 1914, 1930, 1984, 1996, 2022, 2045, 2100.0]	20	52	1	r1i1p1	GFDL–ESM2G	RCP4.5	100	1996	1984	2022	100	28.4697	0.458676	100	1996	0.96	1997	0.02
518	r1i1p1_GFDL–ESM2G_RCP4.5_045.final.csv	[1861.0, 1914, 1930, 1984, 1996, 2022, 2045, 2100.0]	20	52	1	r1i1p1	GFDL–ESM2G	RCP4.5	100	2022	1996	2045	100	34.5749	0.29397	100	2022	1	0	0
519	r1i1p1_GFDL–ESM2G_RCP4.5_045.final.csv	[1861.0, 1914, 1930, 1984, 1996, 2022, 2045, 2100.0]	20	52	1	r1i1p1	GFDL–ESM2G	RCP4.5	100	2045	2022	2100	100	61.252	0.387263	100	2045	1	0	0
Seq	Source	BreakSet	DatasetNo	SetNo	SetNoInData	Type	Model	Treat	%BreakSet	Year	Predecessor	Successor	%SegmentFound	Ti	Shift	%YearOverall	ModalYear	ModalValue	SecondModalYear	SecondModalValue
520	r1i1p1_GFDL–ESM2M_RCP4.5_046.final.csv	[1861.0, 1883, 1893, 1976, 1995, 2010, 2027, 2040, 2059, 2100.0]	21	53	1	r1i1p1	GFDL–ESM2M	RCP4.5	100	1883	1861	1893	100	15.1947	–0.241930411167	100	1883	0.84	1875	0.15
521	r1i1p1_GFDL–ESM2M_RCP4.5_046.final.csv	[1861.0, 1883, 1893, 1976, 1995, 2010, 2027, 2040, 2059, 2100.0]	21	53	1	r1i1p1	GFDL–ESM2M	RCP4.5	100	1893	1883	1976	100	38.5962	0.399187	100	1893	0.98	1889	0.01
522	r1i1p1_GFDL–ESM2M_RCP4.5_046.final.csv	[1861.0, 1883, 1893, 1976, 1995, 2010, 2027, 2040, 2059, 2100.0]	21	53	1	r1i1p1	GFDL–ESM2M	RCP4.5	100	1976	1893	1995	100	31.1498	0.244861	100	1976	1	0	0
523	r1i1p1_GFDL–ESM2M_RCP4.5_046.final.csv	[1861.0, 1883, 1893, 1976, 1995, 2010, 2027, 2040, 2059, 2100.0]	21	53	1	r1i1p1	GFDL–ESM2M	RCP4.5	100	1995	1976	2010	100	23.3209	0.402923	100	1995	1	0	0
524	r1i1p1_GFDL–ESM2M_RCP4.5_046.final.csv	[1861.0, 1883, 1893, 1976, 1995, 2010, 2027, 2040, 2059, 2100.0]	21	53	1	r1i1p1	GFDL–ESM2M	RCP4.5	100	2010	1995	2027	100	18.2489	0.275165	100	2010	0.83	2012	0.09
525	r1i1p1_GFDL–ESM2M_RCP4.5_046.final.csv	[1861.0, 1883, 1893, 1976, 1995, 2010, 2027, 2040, 2059, 2100.0]	21	53	1	r1i1p1	GFDL–ESM2M	RCP4.5	100	2027	2010	2040	100	17.7902	0.230355	100	2027	0.91	2023	0.06
526	r1i1p1_GFDL–ESM2M_RCP4.5_046.final.csv	[1861.0, 1883, 1893, 1976, 1995, 2010, 2027, 2040, 2059, 2100.0]	21	53	1	r1i1p1	GFDL–ESM2M	RCP4.5	100	2040	2027	2059	100	15.8604	0.191418	100	2040	0.96	2041	0.04
527	r1i1p1_GFDL–ESM2M_RCP4.5_046.final.csv	[1861.0, 1883, 1893, 1976, 1995, 2010, 2027, 2040, 2059, 2100.0]	21	53	1	r1i1p1	GFDL–ESM2M	RCP4.5	100	2059	2040	2100	100	35.6675	0.273148	100	2059	0.74	2060	0.26
Seq	Source	BreakSet	DatasetNo	SetNo	SetNoInData	Type	Model	Treat	%BreakSet	Year	Predecessor	Successor	%SegmentFound	Ti	Shift	%YearOverall	ModalYear	ModalValue	SecondModalYear	SecondModalValue
528	r1i1p1_GISS–E2–H_RCP4.5_047.final.csv	[1861.0, 1873, 1905, 1917, 1932, 1972, 1994, 2001, 2014, 2022, 2034, 2046, 2056, 2063, 2080, 2100.0]	22	54	1	r1i1p1	GISS–E2–H	RCP4.5	30	1873	1861	1905	30	6.12082	0.0871191	30	1892	0.87	1891	0.09
529	r1i1p1_GISS–E2–H_RCP4.5_047.final.csv	[1861.0, 1873, 1905, 1917, 1932, 1972, 1994, 2001, 2014, 2022, 2034, 2046, 2056, 2063, 2080, 2100.0]	22	54	1	r1i1p1	GISS–E2–H	RCP4.5	30	1905	1873	1917	30	12.4352	0.147436	90	1905	0.96	1892	0.02
530	r1i1p1_GISS–E2–H_RCP4.5_047.final.csv	[1861.0, 1873, 1905, 1917, 1932, 1972, 1994, 2001, 2014, 2022, 2034, 2046, 2056, 2063, 2080, 2100.0]	22	54	1	r1i1p1	GISS–E2–H	RCP4.5	30	1917	1905	1932	90	17.2184	0.132662	90	1917	0.92	1916	0.03
531	r1i1p1_GISS–E2–H_RCP4.5_047.final.csv	[1861.0, 1873, 1905, 1917, 1932, 1972, 1994, 2001, 2014, 2022, 2034, 2046, 2056, 2063, 2080, 2100.0]	22	54	1	r1i1p1	GISS–E2–H	RCP4.5	30	1932	1917	1972	90	28.247	0.159626	100	1932	1	0	0
532	r1i1p1_GISS–E2–H_RCP4.5_047.final.csv	[1861.0, 1873, 1905, 1917, 1932, 1972, 1994, 2001, 2014, 2022, 2034, 2046, 2056, 2063, 2080, 2100.0]	22	54	1	r1i1p1	GISS–E2–H	RCP4.5	30	1972	1932	1994	99	31.9045	0.185025	99	1972	0.59	1970	0.24
533	r1i1p1_GISS–E2–H_RCP4.5_047.final.csv	[1861.0, 1873, 1905, 1917, 1932, 1972, 1994, 2001, 2014, 2022, 2034, 2046, 2056, 2063, 2080, 2100.0]	22	54	1	r1i1p1	GISS–E2–H	RCP4.5	30	1994	1972	2001	99	15.5763	0.242164	100	1994	0.97	1985	0.01
534	r1i1p1_GISS–E2–H_RCP4.5_047.final.csv	[1861.0, 1873, 1905, 1917, 1932, 1972, 1994, 2001, 2014, 2022, 2034, 2046, 2056, 2063, 2080, 2100.0]	22	54	1	r1i1p1	GISS–E2–H	RCP4.5	30	2001	1994	2014	100	14.4998	0.261367	100	2001	0.75	2003	0.13
535	r1i1p1_GISS–E2–H_RCP4.5_047.final.csv	[1861.0, 1873, 1905, 1917, 1932, 1972, 1994, 2001, 2014, 2022, 2034, 2046, 2056, 2063, 2080, 2100.0]	22	54	1	r1i1p1	GISS–E2–H	RCP4.5	30	2014	2001	2022	100	15.8703	0.284044	100	2014	0.74	2013	0.2
536	r1i1p1_GISS–E2–H_RCP4.5_047.final.csv	[1861.0, 1873, 1905, 1917, 1932, 1972, 1994, 2001, 2014, 2022, 2034, 2046, 2056, 2063, 2080, 2100.0]	22	54	1	r1i1p1	GISS–E2–H	RCP4.5	30	2022	2014	2034	100	13.5696	0.177454	100	2022	0.99	2028	0.01
537	r1i1p1_GISS–E2–H_RCP4.5_047.final.csv	[1861.0, 1873, 1905, 1917, 1932, 1972, 1994, 2001, 2014, 2022, 2034, 2046, 2056, 2063, 2080, 2100.0]	22	54	1	r1i1p1	GISS–E2–H	RCP4.5	30	2034	2022	2046	100	18.8261	0.218566	100	2034	0.84	2032	0.08
538	r1i1p1_GISS–E2–H_RCP4.5_047.final.csv	[1861.0, 1873, 1905, 1917, 1932, 1972, 1994, 2001, 2014, 2022, 2034, 2046, 2056, 2063, 2080, 2100.0]	22	54	1	r1i1p1	GISS–E2–H	RCP4.5	30	2046	2034	2056	100	18.322	0.223229	100	2046	0.96	2045	0.04
539	r1i1p1_GISS–E2–H_RCP4.5_047.final.csv	[1861.0, 1873, 1905, 1917, 1932, 1972, 1994, 2001, 2014, 2022, 2034, 2046, 2056, 2063, 2080, 2100.0]	22	54	1	r1i1p1	GISS–E2–H	RCP4.5	30	2056	2046	2063	100	9.70186	0.108675	100	2056	0.8	2054	0.07
540	r1i1p1_GISS–E2–H_RCP4.5_047.final.csv	[1861.0, 1873, 1905, 1917, 1932, 1972, 1994, 2001, 2014, 2022, 2034, 2046, 2056, 2063, 2080, 2100.0]	22	54	1	r1i1p1	GISS–E2–H	RCP4.5	30	2063	2056	2080	100	13.592	0.0906835	100	2063	0.59	2064	0.18
541	r1i1p1_GISS–E2–H_RCP4.5_047.final.csv	[1861.0, 1873, 1905, 1917, 1932, 1972, 1994, 2001, 2014, 2022, 2034, 2046, 2056, 2063, 2080, 2100.0]	22	54	1	r1i1p1	GISS–E2–H	RCP4.5	30	2080	2063	2100	100	24.2685	0.120456	100	2080	0.96	2083	0.04
542	r1i1p1_GISS–E2–H_RCP4.5_047.final.csv	[1861.0, 1892, 1916, 1932, 1972, 1994, 2001, 2014, 2022, 2034, 2046, 2056, 2063, 2080, 2100.0]	22	55	2	r1i1p1	GISS–E2–H	RCP4.5	9	1892	1861	1916	10	17.6302	0.133156	10	1892	0.8	1905	0.1
543	r1i1p1_GISS–E2–H_RCP4.5_047.final.csv	[1861.0, 1892, 1916, 1932, 1972, 1994, 2001, 2014, 2022, 2034, 2046, 2056, 2063, 2080, 2100.0]	22	55	2	r1i1p1	GISS–E2–H	RCP4.5	9	1916	1892	1932	10	25.668	0.186649	10	1916	0.92	1917	0.08
544	r1i1p1_GISS–E2–H_RCP4.5_047.final.csv	[1861.0, 1892, 1916, 1932, 1972, 1994, 2001, 2014, 2022, 2034, 2046, 2056, 2063, 2080, 2100.0]	22	55	2	r1i1p1	GISS–E2–H	RCP4.5	9	1932	1916	1972	9	29.9341	0.165174	100	1932	0.99	1931	0.01
545	r1i1p1_GISS–E2–H_RCP4.5_047.final.csv	[1861.0, 1892, 1916, 1932, 1972, 1994, 2001, 2014, 2022, 2034, 2046, 2056, 2063, 2080, 2100.0]	22	55	2	r1i1p1	GISS–E2–H	RCP4.5	9	1972	1932	1994	99	31.9045	0.185025	99	1972	0.59	1970	0.24
546	r1i1p1_GISS–E2–H_RCP4.5_047.final.csv	[1861.0, 1892, 1916, 1932, 1972, 1994, 2001, 2014, 2022, 2034, 2046, 2056, 2063, 2080, 2100.0]	22	55	2	r1i1p1	GISS–E2–H	RCP4.5	9	1994	1972	2001	99	15.5763	0.242164	100	1994	0.97	1985	0.01
547	r1i1p1_GISS–E2–H_RCP4.5_047.final.csv	[1861.0, 1892, 1916, 1932, 1972, 1994, 2001, 2014, 2022, 2034, 2046, 2056, 2063, 2080, 2100.0]	22	55	2	r1i1p1	GISS–E2–H	RCP4.5	9	2001	1994	2014	100	14.4998	0.261367	100	2001	0.75	2003	0.13
548	r1i1p1_GISS–E2–H_RCP4.5_047.final.csv	[1861.0, 1892, 1916, 1932, 1972, 1994, 2001, 2014, 2022, 2034, 2046, 2056, 2063, 2080, 2100.0]	22	55	2	r1i1p1	GISS–E2–H	RCP4.5	9	2014	2001	2022	100	15.8703	0.284044	100	2014	0.74	2013	0.2
549	r1i1p1_GISS–E2–H_RCP4.5_047.final.csv	[1861.0, 1892, 1916, 1932, 1972, 1994, 2001, 2014, 2022, 2034, 2046, 2056, 2063, 2080, 2100.0]	22	55	2	r1i1p1	GISS–E2–H	RCP4.5	9	2022	2014	2034	100	13.5696	0.177454	100	2022	0.99	2028	0.01
550	r1i1p1_GISS–E2–H_RCP4.5_047.final.csv	[1861.0, 1892, 1916, 1932, 1972, 1994, 2001, 2014, 2022, 2034, 2046, 2056, 2063, 2080, 2100.0]	22	55	2	r1i1p1	GISS–E2–H	RCP4.5	9	2034	2022	2046	100	18.8261	0.218566	100	2034	0.84	2032	0.08
551	r1i1p1_GISS–E2–H_RCP4.5_047.final.csv	[1861.0, 1892, 1916, 1932, 1972, 1994, 2001, 2014, 2022, 2034, 2046, 2056, 2063, 2080, 2100.0]	22	55	2	r1i1p1	GISS–E2–H	RCP4.5	9	2046	2034	2056	100	18.322	0.223229	100	2046	0.96	2045	0.04
552	r1i1p1_GISS–E2–H_RCP4.5_047.final.csv	[1861.0, 1892, 1916, 1932, 1972, 1994, 2001, 2014, 2022, 2034, 2046, 2056, 2063, 2080, 2100.0]	22	55	2	r1i1p1	GISS–E2–H	RCP4.5	9	2056	2046	2063	100	9.70186	0.108675	100	2056	0.8	2054	0.07
553	r1i1p1_GISS–E2–H_RCP4.5_047.final.csv	[1861.0, 1892, 1916, 1932, 1972, 1994, 2001, 2014, 2022, 2034, 2046, 2056, 2063, 2080, 2100.0]	22	55	2	r1i1p1	GISS–E2–H	RCP4.5	9	2063	2056	2080	100	13.592	0.0906835	100	2063	0.59	2064	0.18
554	r1i1p1_GISS–E2–H_RCP4.5_047.final.csv	[1861.0, 1892, 1916, 1932, 1972, 1994, 2001, 2014, 2022, 2034, 2046, 2056, 2063, 2080, 2100.0]	22	55	2	r1i1p1	GISS–E2–H	RCP4.5	9	2080	2063	2100	100	24.2685	0.120456	100	2080	0.96	2083	0.04
555	r1i1p1_GISS–E2–H_RCP4.5_047.final.csv	[1861.0, 1905, 1917, 1932, 1972, 1994, 2001, 2014, 2022, 2034, 2046, 2056, 2063, 2080, 2100.0]	22	56	3	r1i1p1	GISS–E2–H	RCP4.5	60	1905	1861	1917	60	18.8807	0.166955	90	1905	0.48	1892	0.45
556	r1i1p1_GISS–E2–H_RCP4.5_047.final.csv	[1861.0, 1905, 1917, 1932, 1972, 1994, 2001, 2014, 2022, 2034, 2046, 2056, 2063, 2080, 2100.0]	22	56	3	r1i1p1	GISS–E2–H	RCP4.5	60	1917	1905	1932	90	17.2184	0.132662	90	1917	0.92	1916	0.03
557	r1i1p1_GISS–E2–H_RCP4.5_047.final.csv	[1861.0, 1905, 1917, 1932, 1972, 1994, 2001, 2014, 2022, 2034, 2046, 2056, 2063, 2080, 2100.0]	22	56	3	r1i1p1	GISS–E2–H	RCP4.5	60	1932	1917	1972	90	28.247	0.159626	100	1932	1	0	0
558	r1i1p1_GISS–E2–H_RCP4.5_047.final.csv	[1861.0, 1905, 1917, 1932, 1972, 1994, 2001, 2014, 2022, 2034, 2046, 2056, 2063, 2080, 2100.0]	22	56	3	r1i1p1	GISS–E2–H	RCP4.5	60	1972	1932	1994	99	31.9045	0.185025	99	1972	0.59	1970	0.24
559	r1i1p1_GISS–E2–H_RCP4.5_047.final.csv	[1861.0, 1905, 1917, 1932, 1972, 1994, 2001, 2014, 2022, 2034, 2046, 2056, 2063, 2080, 2100.0]	22	56	3	r1i1p1	GISS–E2–H	RCP4.5	60	1994	1972	2001	99	15.5763	0.242164	100	1994	0.97	1985	0.01
560	r1i1p1_GISS–E2–H_RCP4.5_047.final.csv	[1861.0, 1905, 1917, 1932, 1972, 1994, 2001, 2014, 2022, 2034, 2046, 2056, 2063, 2080, 2100.0]	22	56	3	r1i1p1	GISS–E2–H	RCP4.5	60	2001	1994	2014	100	14.4998	0.261367	100	2001	0.75	2003	0.13
561	r1i1p1_GISS–E2–H_RCP4.5_047.final.csv	[1861.0, 1905, 1917, 1932, 1972, 1994, 2001, 2014, 2022, 2034, 2046, 2056, 2063, 2080, 2100.0]	22	56	3	r1i1p1	GISS–E2–H	RCP4.5	60	2014	2001	2022	100	15.8703	0.284044	100	2014	0.74	2013	0.2
562	r1i1p1_GISS–E2–H_RCP4.5_047.final.csv	[1861.0, 1905, 1917, 1932, 1972, 1994, 2001, 2014, 2022, 2034, 2046, 2056, 2063, 2080, 2100.0]	22	56	3	r1i1p1	GISS–E2–H	RCP4.5	60	2022	2014	2034	100	13.5696	0.177454	100	2022	0.99	2028	0.01
563	r1i1p1_GISS–E2–H_RCP4.5_047.final.csv	[1861.0, 1905, 1917, 1932, 1972, 1994, 2001, 2014, 2022, 2034, 2046, 2056, 2063, 2080, 2100.0]	22	56	3	r1i1p1	GISS–E2–H	RCP4.5	60	2034	2022	2046	100	18.8261	0.218566	100	2034	0.84	2032	0.08
564	r1i1p1_GISS–E2–H_RCP4.5_047.final.csv	[1861.0, 1905, 1917, 1932, 1972, 1994, 2001, 2014, 2022, 2034, 2046, 2056, 2063, 2080, 2100.0]	22	56	3	r1i1p1	GISS–E2–H	RCP4.5	60	2046	2034	2056	100	18.322	0.223229	100	2046	0.96	2045	0.04
565	r1i1p1_GISS–E2–H_RCP4.5_047.final.csv	[1861.0, 1905, 1917, 1932, 1972, 1994, 2001, 2014, 2022, 2034, 2046, 2056, 2063, 2080, 2100.0]	22	56	3	r1i1p1	GISS–E2–H	RCP4.5	60	2056	2046	2063	100	9.70186	0.108675	100	2056	0.8	2054	0.07
566	r1i1p1_GISS–E2–H_RCP4.5_047.final.csv	[1861.0, 1905, 1917, 1932, 1972, 1994, 2001, 2014, 2022, 2034, 2046, 2056, 2063, 2080, 2100.0]	22	56	3	r1i1p1	GISS–E2–H	RCP4.5	60	2063	2056	2080	100	13.592	0.0906835	100	2063	0.59	2064	0.18
567	r1i1p1_GISS–E2–H_RCP4.5_047.final.csv	[1861.0, 1905, 1917, 1932, 1972, 1994, 2001, 2014, 2022, 2034, 2046, 2056, 2063, 2080, 2100.0]	22	56	3	r1i1p1	GISS–E2–H	RCP4.5	60	2080	2063	2100	100	24.2685	0.120456	100	2080	0.96	2083	0.04
568	r1i1p1_GISS–E2–H_RCP4.5_047.final.csv	[1861.0, 1892, 1916, 1932, 1970, 1994, 2001, 2014, 2022, 2034, 2046, 2056, 2063, 2080, 2100.0]	22	57	4	r1i1p1	GISS–E2–H	RCP4.5	1	1892	1861	1916	10	17.6302	0.133156	10	1892	0.8	1905	0.1
569	r1i1p1_GISS–E2–H_RCP4.5_047.final.csv	[1861.0, 1892, 1916, 1932, 1970, 1994, 2001, 2014, 2022, 2034, 2046, 2056, 2063, 2080, 2100.0]	22	57	4	r1i1p1	GISS–E2–H	RCP4.5	1	1916	1892	1932	10	25.668	0.186649	10	1916	0.92	1917	0.08
570	r1i1p1_GISS–E2–H_RCP4.5_047.final.csv	[1861.0, 1892, 1916, 1932, 1970, 1994, 2001, 2014, 2022, 2034, 2046, 2056, 2063, 2080, 2100.0]	22	57	4	r1i1p1	GISS–E2–H	RCP4.5	1	1932	1916	1970	1	28.7194	0.16043	100	1932	0.98	1931	0.02
571	r1i1p1_GISS–E2–H_RCP4.5_047.final.csv	[1861.0, 1892, 1916, 1932, 1970, 1994, 2001, 2014, 2022, 2034, 2046, 2056, 2063, 2080, 2100.0]	22	57	4	r1i1p1	GISS–E2–H	RCP4.5	1	1970	1932	1994	1	31.9045	0.185025	1	1972	0.59	1970	0.24
572	r1i1p1_GISS–E2–H_RCP4.5_047.final.csv	[1861.0, 1892, 1916, 1932, 1970, 1994, 2001, 2014, 2022, 2034, 2046, 2056, 2063, 2080, 2100.0]	22	57	4	r1i1p1	GISS–E2–H	RCP4.5	1	1994	1970	2001	1	16.8528	0.250788	100	1994	0.96	1986	0.02
573	r1i1p1_GISS–E2–H_RCP4.5_047.final.csv	[1861.0, 1892, 1916, 1932, 1970, 1994, 2001, 2014, 2022, 2034, 2046, 2056, 2063, 2080, 2100.0]	22	57	4	r1i1p1	GISS–E2–H	RCP4.5	1	2001	1994	2014	100	14.4998	0.261367	100	2001	0.75	2003	0.13
574	r1i1p1_GISS–E2–H_RCP4.5_047.final.csv	[1861.0, 1892, 1916, 1932, 1970, 1994, 2001, 2014, 2022, 2034, 2046, 2056, 2063, 2080, 2100.0]	22	57	4	r1i1p1	GISS–E2–H	RCP4.5	1	2014	2001	2022	100	15.8703	0.284044	100	2014	0.74	2013	0.2
575	r1i1p1_GISS–E2–H_RCP4.5_047.final.csv	[1861.0, 1892, 1916, 1932, 1970, 1994, 2001, 2014, 2022, 2034, 2046, 2056, 2063, 2080, 2100.0]	22	57	4	r1i1p1	GISS–E2–H	RCP4.5	1	2022	2014	2034	100	13.5696	0.177454	100	2022	0.99	2028	0.01
576	r1i1p1_GISS–E2–H_RCP4.5_047.final.csv	[1861.0, 1892, 1916, 1932, 1970, 1994, 2001, 2014, 2022, 2034, 2046, 2056, 2063, 2080, 2100.0]	22	57	4	r1i1p1	GISS–E2–H	RCP4.5	1	2034	2022	2046	100	18.8261	0.218566	100	2034	0.84	2032	0.08
577	r1i1p1_GISS–E2–H_RCP4.5_047.final.csv	[1861.0, 1892, 1916, 1932, 1970, 1994, 2001, 2014, 2022, 2034, 2046, 2056, 2063, 2080, 2100.0]	22	57	4	r1i1p1	GISS–E2–H	RCP4.5	1	2046	2034	2056	100	18.322	0.223229	100	2046	0.96	2045	0.04
578	r1i1p1_GISS–E2–H_RCP4.5_047.final.csv	[1861.0, 1892, 1916, 1932, 1970, 1994, 2001, 2014, 2022, 2034, 2046, 2056, 2063, 2080, 2100.0]	22	57	4	r1i1p1	GISS–E2–H	RCP4.5	1	2056	2046	2063	100	9.70186	0.108675	100	2056	0.8	2054	0.07
579	r1i1p1_GISS–E2–H_RCP4.5_047.final.csv	[1861.0, 1892, 1916, 1932, 1970, 1994, 2001, 2014, 2022, 2034, 2046, 2056, 2063, 2080, 2100.0]	22	57	4	r1i1p1	GISS–E2–H	RCP4.5	1	2063	2056	2080	100	13.592	0.0906835	100	2063	0.59	2064	0.18
580	r1i1p1_GISS–E2–H_RCP4.5_047.final.csv	[1861.0, 1892, 1916, 1932, 1970, 1994, 2001, 2014, 2022, 2034, 2046, 2056, 2063, 2080, 2100.0]	22	57	4	r1i1p1	GISS–E2–H	RCP4.5	1	2080	2063	2100	100	24.2685	0.120456	100	2080	0.96	2083	0.04
Seq	Source	BreakSet	DatasetNo	SetNo	SetNoInData	Type	Model	Treat	%BreakSet	Year	Predecessor	Successor	%SegmentFound	Ti	Shift	%YearOverall	ModalYear	ModalValue	SecondModalYear	SecondModalValue
581	r1i1p1_GISS–E2–H–CC_RCP4.5_062.final.csv	[1861.0, 1913, 1938, 1975, 1995, 2008, 2015, 2026, 2039, 2048, 2074, 2100.0]	23	58	1	r1i1p1	GISS–E2–H–CC	RCP4.5	43	1913	1861	1938	100	45.9126	0.26479	100	1913	0.77	1908	0.19
582	r1i1p1_GISS–E2–H–CC_RCP4.5_062.final.csv	[1861.0, 1913, 1938, 1975, 1995, 2008, 2015, 2026, 2039, 2048, 2074, 2100.0]	23	58	1	r1i1p1	GISS–E2–H–CC	RCP4.5	43	1938	1913	1975	100	35.0765	0.187174	100	1938	1	0	0
583	r1i1p1_GISS–E2–H–CC_RCP4.5_062.final.csv	[1861.0, 1913, 1938, 1975, 1995, 2008, 2015, 2026, 2039, 2048, 2074, 2100.0]	23	58	1	r1i1p1	GISS–E2–H–CC	RCP4.5	43	1975	1938	1995	100	37.0748	0.291351	100	1975	0.59	1971	0.22
584	r1i1p1_GISS–E2–H–CC_RCP4.5_062.final.csv	[1861.0, 1913, 1938, 1975, 1995, 2008, 2015, 2026, 2039, 2048, 2074, 2100.0]	23	58	1	r1i1p1	GISS–E2–H–CC	RCP4.5	43	1995	1975	2008	100	24.4243	0.39826	100	1995	0.99	1997	0.01
585	r1i1p1_GISS–E2–H–CC_RCP4.5_062.final.csv	[1861.0, 1913, 1938, 1975, 1995, 2008, 2015, 2026, 2039, 2048, 2074, 2100.0]	23	58	1	r1i1p1	GISS–E2–H–CC	RCP4.5	43	2008	1995	2015	43	13.5509	0.252823	100	2008	0.98	2000	0.01
586	r1i1p1_GISS–E2–H–CC_RCP4.5_062.final.csv	[1861.0, 1913, 1938, 1975, 1995, 2008, 2015, 2026, 2039, 2048, 2074, 2100.0]	23	58	1	r1i1p1	GISS–E2–H–CC	RCP4.5	43	2015	2008	2026	43	11.4835	0.150318	43	2015	0.96	2019	0.02
587	r1i1p1_GISS–E2–H–CC_RCP4.5_062.final.csv	[1861.0, 1913, 1938, 1975, 1995, 2008, 2015, 2026, 2039, 2048, 2074, 2100.0]	23	58	1	r1i1p1	GISS–E2–H–CC	RCP4.5	43	2026	2015	2039	43	17.6643	0.232083	43	2026	0.76	2024	0.12
588	r1i1p1_GISS–E2–H–CC_RCP4.5_062.final.csv	[1861.0, 1913, 1938, 1975, 1995, 2008, 2015, 2026, 2039, 2048, 2074, 2100.0]	23	58	1	r1i1p1	GISS–E2–H–CC	RCP4.5	43	2039	2026	2048	43	14.5611	0.196115	43	2039	0.53	2038	0.38
589	r1i1p1_GISS–E2–H–CC_RCP4.5_062.final.csv	[1861.0, 1913, 1938, 1975, 1995, 2008, 2015, 2026, 2039, 2048, 2074, 2100.0]	23	58	1	r1i1p1	GISS–E2–H–CC	RCP4.5	43	2048	2039	2074	43	25.245	0.226329	100	2048	1	0	0
590	r1i1p1_GISS–E2–H–CC_RCP4.5_062.final.csv	[1861.0, 1913, 1938, 1975, 1995, 2008, 2015, 2026, 2039, 2048, 2074, 2100.0]	23	58	1	r1i1p1	GISS–E2–H–CC	RCP4.5	43	2074	2048	2100	100	27.9887	0.122087	100	2074	0.59	2064	0.18
591	r1i1p1_GISS–E2–H–CC_RCP4.5_062.final.csv	[1861.0, 1913, 1938, 1975, 1995, 2008, 2024, 2038, 2048, 2074, 2100.0]	23	59	2	r1i1p1	GISS–E2–H–CC	RCP4.5	56	1913	1861	1938	100	45.9126	0.26479	100	1913	0.77	1908	0.19
592	r1i1p1_GISS–E2–H–CC_RCP4.5_062.final.csv	[1861.0, 1913, 1938, 1975, 1995, 2008, 2024, 2038, 2048, 2074, 2100.0]	23	59	2	r1i1p1	GISS–E2–H–CC	RCP4.5	56	1938	1913	1975	100	35.0765	0.187174	100	1938	1	0	0
593	r1i1p1_GISS–E2–H–CC_RCP4.5_062.final.csv	[1861.0, 1913, 1938, 1975, 1995, 2008, 2024, 2038, 2048, 2074, 2100.0]	23	59	2	r1i1p1	GISS–E2–H–CC	RCP4.5	56	1975	1938	1995	100	37.0748	0.291351	100	1975	0.59	1971	0.22
594	r1i1p1_GISS–E2–H–CC_RCP4.5_062.final.csv	[1861.0, 1913, 1938, 1975, 1995, 2008, 2024, 2038, 2048, 2074, 2100.0]	23	59	2	r1i1p1	GISS–E2–H–CC	RCP4.5	56	1995	1975	2008	100	24.4243	0.39826	100	1995	0.99	1997	0.01
595	r1i1p1_GISS–E2–H–CC_RCP4.5_062.final.csv	[1861.0, 1913, 1938, 1975, 1995, 2008, 2024, 2038, 2048, 2074, 2100.0]	23	59	2	r1i1p1	GISS–E2–H–CC	RCP4.5	56	2008	1995	2024	57	22.2102	0.324073	100	2008	1	0	0
596	r1i1p1_GISS–E2–H–CC_RCP4.5_062.final.csv	[1861.0, 1913, 1938, 1975, 1995, 2008, 2024, 2038, 2048, 2074, 2100.0]	23	59	2	r1i1p1	GISS–E2–H–CC	RCP4.5	56	2024	2008	2038	56	22.6472	0.28324	57	2024	0.96	2023	0.02
597	r1i1p1_GISS–E2–H–CC_RCP4.5_062.final.csv	[1861.0, 1913, 1938, 1975, 1995, 2008, 2024, 2038, 2048, 2074, 2100.0]	23	59	2	r1i1p1	GISS–E2–H–CC	RCP4.5	56	2038	2024	2048	56	15.7773	0.211727	56	2038	0.44	2037	0.35
598	r1i1p1_GISS–E2–H–CC_RCP4.5_062.final.csv	[1861.0, 1913, 1938, 1975, 1995, 2008, 2024, 2038, 2048, 2074, 2100.0]	23	59	2	r1i1p1	GISS–E2–H–CC	RCP4.5	56	2048	2038	2074	56	26.6361	0.237245	100	2048	1	0	0
599	r1i1p1_GISS–E2–H–CC_RCP4.5_062.final.csv	[1861.0, 1913, 1938, 1975, 1995, 2008, 2024, 2038, 2048, 2074, 2100.0]	23	59	2	r1i1p1	GISS–E2–H–CC	RCP4.5	56	2074	2048	2100	100	27.9887	0.122087	100	2074	0.59	2064	0.18
600	r1i1p1_GISS–E2–H–CC_RCP4.5_062.final.csv	[1861.0, 1913, 1938, 1975, 1995, 2008, 2024, 2037, 2048, 2074, 2100.0]	23	60	3	r1i1p1	GISS–E2–H–CC	RCP4.5	1	1913	1861	1938	100	45.9126	0.26479	100	1913	0.77	1908	0.19
601	r1i1p1_GISS–E2–H–CC_RCP4.5_062.final.csv	[1861.0, 1913, 1938, 1975, 1995, 2008, 2024, 2037, 2048, 2074, 2100.0]	23	60	3	r1i1p1	GISS–E2–H–CC	RCP4.5	1	1938	1913	1975	100	35.0765	0.187174	100	1938	1	0	0
602	r1i1p1_GISS–E2–H–CC_RCP4.5_062.final.csv	[1861.0, 1913, 1938, 1975, 1995, 2008, 2024, 2037, 2048, 2074, 2100.0]	23	60	3	r1i1p1	GISS–E2–H–CC	RCP4.5	1	1975	1938	1995	100	37.0748	0.291351	100	1975	0.59	1971	0.22
603	r1i1p1_GISS–E2–H–CC_RCP4.5_062.final.csv	[1861.0, 1913, 1938, 1975, 1995, 2008, 2024, 2037, 2048, 2074, 2100.0]	23	60	3	r1i1p1	GISS–E2–H–CC	RCP4.5	1	1995	1975	2008	100	24.4243	0.39826	100	1995	0.99	1997	0.01
604	r1i1p1_GISS–E2–H–CC_RCP4.5_062.final.csv	[1861.0, 1913, 1938, 1975, 1995, 2008, 2024, 2037, 2048, 2074, 2100.0]	23	60	3	r1i1p1	GISS–E2–H–CC	RCP4.5	1	2008	1995	2024	57	22.2102	0.324073	100	2008	1	0	0
605	r1i1p1_GISS–E2–H–CC_RCP4.5_062.final.csv	[1861.0, 1913, 1938, 1975, 1995, 2008, 2024, 2037, 2048, 2074, 2100.0]	23	60	3	r1i1p1	GISS–E2–H–CC	RCP4.5	1	2024	2008	2037	1	21.804	0.276394	57	2024	0.97	2023	0.02
606	r1i1p1_GISS–E2–H–CC_RCP4.5_062.final.csv	[1861.0, 1913, 1938, 1975, 1995, 2008, 2024, 2037, 2048, 2074, 2100.0]	23	60	3	r1i1p1	GISS–E2–H–CC	RCP4.5	1	2037	2024	2048	1	15.7773	0.211727	1	2038	0.44	2037	0.35
607	r1i1p1_GISS–E2–H–CC_RCP4.5_062.final.csv	[1861.0, 1913, 1938, 1975, 1995, 2008, 2024, 2037, 2048, 2074, 2100.0]	23	60	3	r1i1p1	GISS–E2–H–CC	RCP4.5	1	2048	2037	2074	1	27.7965	0.248137	100	2048	1	0	0
608	r1i1p1_GISS–E2–H–CC_RCP4.5_062.final.csv	[1861.0, 1913, 1938, 1975, 1995, 2008, 2024, 2037, 2048, 2074, 2100.0]	23	60	3	r1i1p1	GISS–E2–H–CC	RCP4.5	1	2074	2048	2100	100	27.9887	0.122087	100	2074	0.59	2064	0.18
Seq	Source	BreakSet	DatasetNo	SetNo	SetNoInData	Type	Model	Treat	%BreakSet	Year	Predecessor	Successor	%SegmentFound	Ti	Shift	%YearOverall	ModalYear	ModalValue	SecondModalYear	SecondModalValue
609	r1i1p1_GISS–E2–R_RCP4.5_063.final.csv	[1861.0, 1924, 1972, 1997, 2009, 2023, 2033, 2045, 2060, 2094, 2100.0]	24	61	1	r1i1p1	GISS–E2–R	RCP4.5	52	1924	1861	1972	100	62.7635	0.207145	100	1924	0.88	1923	0.08
610	r1i1p1_GISS–E2–R_RCP4.5_063.final.csv	[1861.0, 1924, 1972, 1997, 2009, 2023, 2033, 2045, 2060, 2094, 2100.0]	24	61	1	r1i1p1	GISS–E2–R	RCP4.5	52	1972	1924	1997	100	44.4426	0.20866	100	1972	1	0	0
611	r1i1p1_GISS–E2–R_RCP4.5_063.final.csv	[1861.0, 1924, 1972, 1997, 2009, 2023, 2033, 2045, 2060, 2094, 2100.0]	24	61	1	r1i1p1	GISS–E2–R	RCP4.5	52	1997	1972	2009	100	28.8022	0.392351	100	1997	1	0	0
612	r1i1p1_GISS–E2–R_RCP4.5_063.final.csv	[1861.0, 1924, 1972, 1997, 2009, 2023, 2033, 2045, 2060, 2094, 2100.0]	24	61	1	r1i1p1	GISS–E2–R	RCP4.5	52	2009	1997	2023	100	19.1473	0.230291	100	2009	0.96	2005	0.02
613	r1i1p1_GISS–E2–R_RCP4.5_063.final.csv	[1861.0, 1924, 1972, 1997, 2009, 2023, 2033, 2045, 2060, 2094, 2100.0]	24	61	1	r1i1p1	GISS–E2–R	RCP4.5	52	2023	2009	2033	100	17.342	0.173501	100	2023	0.97	2022	0.01
614	r1i1p1_GISS–E2–R_RCP4.5_063.final.csv	[1861.0, 1924, 1972, 1997, 2009, 2023, 2033, 2045, 2060, 2094, 2100.0]	24	61	1	r1i1p1	GISS–E2–R	RCP4.5	52	2033	2023	2045	52	16.3542	0.230279	100	2033	0.64	2034	0.2
615	r1i1p1_GISS–E2–R_RCP4.5_063.final.csv	[1861.0, 1924, 1972, 1997, 2009, 2023, 2033, 2045, 2060, 2094, 2100.0]	24	61	1	r1i1p1	GISS–E2–R	RCP4.5	52	2045	2033	2060	52	17.1029	0.161272	52	2045	0.5	2046	0.48
616	r1i1p1_GISS–E2–R_RCP4.5_063.final.csv	[1861.0, 1924, 1972, 1997, 2009, 2023, 2033, 2045, 2060, 2094, 2100.0]	24	61	1	r1i1p1	GISS–E2–R	RCP4.5	52	2060	2045	2094	52	26.4054	0.12872	100	2060	0.61	2059	0.37
617	r1i1p1_GISS–E2–R_RCP4.5_063.final.csv	[1861.0, 1924, 1972, 1997, 2009, 2023, 2033, 2045, 2060, 2094, 2100.0]	24	61	1	r1i1p1	GISS–E2–R	RCP4.5	52	2094	2060	2100	100	14.9633	0.117086	100	2094	0.92	2092	0.04
618	r1i1p1_GISS–E2–R_RCP4.5_063.final.csv	[1861.0, 1924, 1972, 1997, 2009, 2023, 2033, 2046, 2060, 2094, 2100.0]	24	62	2	r1i1p1	GISS–E2–R	RCP4.5	48	1924	1861	1972	100	62.7635	0.207145	100	1924	0.88	1923	0.08
619	r1i1p1_GISS–E2–R_RCP4.5_063.final.csv	[1861.0, 1924, 1972, 1997, 2009, 2023, 2033, 2046, 2060, 2094, 2100.0]	24	62	2	r1i1p1	GISS–E2–R	RCP4.5	48	1972	1924	1997	100	44.4426	0.20866	100	1972	1	0	0
620	r1i1p1_GISS–E2–R_RCP4.5_063.final.csv	[1861.0, 1924, 1972, 1997, 2009, 2023, 2033, 2046, 2060, 2094, 2100.0]	24	62	2	r1i1p1	GISS–E2–R	RCP4.5	48	1997	1972	2009	100	28.8022	0.392351	100	1997	1	0	0
621	r1i1p1_GISS–E2–R_RCP4.5_063.final.csv	[1861.0, 1924, 1972, 1997, 2009, 2023, 2033, 2046, 2060, 2094, 2100.0]	24	62	2	r1i1p1	GISS–E2–R	RCP4.5	48	2009	1997	2023	100	19.1473	0.230291	100	2009	0.96	2005	0.02
622	r1i1p1_GISS–E2–R_RCP4.5_063.final.csv	[1861.0, 1924, 1972, 1997, 2009, 2023, 2033, 2046, 2060, 2094, 2100.0]	24	62	2	r1i1p1	GISS–E2–R	RCP4.5	48	2023	2009	2033	100	17.342	0.173501	100	2023	0.97	2022	0.01
623	r1i1p1_GISS–E2–R_RCP4.5_063.final.csv	[1861.0, 1924, 1972, 1997, 2009, 2023, 2033, 2046, 2060, 2094, 2100.0]	24	62	2	r1i1p1	GISS–E2–R	RCP4.5	48	2033	2023	2046	48	17.2848	0.236411	100	2033	0.43	2034	0.35
624	r1i1p1_GISS–E2–R_RCP4.5_063.final.csv	[1861.0, 1924, 1972, 1997, 2009, 2023, 2033, 2046, 2060, 2094, 2100.0]	24	62	2	r1i1p1	GISS–E2–R	RCP4.5	48	2046	2033	2060	48	17.1029	0.161272	48	2045	0.5	2046	0.48
625	r1i1p1_GISS–E2–R_RCP4.5_063.final.csv	[1861.0, 1924, 1972, 1997, 2009, 2023, 2033, 2046, 2060, 2094, 2100.0]	24	62	2	r1i1p1	GISS–E2–R	RCP4.5	48	2060	2046	2094	48	24.6387	0.122738	100	2060	0.82	2059	0.17
626	r1i1p1_GISS–E2–R_RCP4.5_063.final.csv	[1861.0, 1924, 1972, 1997, 2009, 2023, 2033, 2046, 2060, 2094, 2100.0]	24	62	2	r1i1p1	GISS–E2–R	RCP4.5	48	2094	2060	2100	100	14.9633	0.117086	100	2094	0.92	2092	0.04
Seq	Source	BreakSet	DatasetNo	SetNo	SetNoInData	Type	Model	Treat	%BreakSet	Year	Predecessor	Successor	%SegmentFound	Ti	Shift	%YearOverall	ModalYear	ModalValue	SecondModalYear	SecondModalValue
627	r1i1p1_GISS–E2–R–CC_RCP4.5_080.final.csv	[1861.0, 1883, 1890, 1922, 1948, 1976, 1997, 2015, 2024, 2036, 2050, 2071, 2083, 2100.0]	25	63	1	r1i1p1	GISS–E2–R–CC	RCP4.5	17	1883	1861	1890	100	19.5533	–0.218771724142	100	1883	1	0	0
628	r1i1p1_GISS–E2–R–CC_RCP4.5_080.final.csv	[1861.0, 1883, 1890, 1922, 1948, 1976, 1997, 2015, 2024, 2036, 2050, 2071, 2083, 2100.0]	25	63	1	r1i1p1	GISS–E2–R–CC	RCP4.5	17	1890	1883	1922	100	26.4489	0.284201	100	1890	0.93	1888	0.07
629	r1i1p1_GISS–E2–R–CC_RCP4.5_080.final.csv	[1861.0, 1883, 1890, 1922, 1948, 1976, 1997, 2015, 2024, 2036, 2050, 2071, 2083, 2100.0]	25	63	1	r1i1p1	GISS–E2–R–CC	RCP4.5	17	1922	1890	1948	100	29.2561	0.133452	100	1922	1	0	0
630	r1i1p1_GISS–E2–R–CC_RCP4.5_080.final.csv	[1861.0, 1883, 1890, 1922, 1948, 1976, 1997, 2015, 2024, 2036, 2050, 2071, 2083, 2100.0]	25	63	1	r1i1p1	GISS–E2–R–CC	RCP4.5	17	1948	1922	1976	45	13.8445	0.094077	100	1948	0.74	1946	0.13
631	r1i1p1_GISS–E2–R–CC_RCP4.5_080.final.csv	[1861.0, 1883, 1890, 1922, 1948, 1976, 1997, 2015, 2024, 2036, 2050, 2071, 2083, 2100.0]	25	63	1	r1i1p1	GISS–E2–R–CC	RCP4.5	17	1976	1948	1997	17	23.7787	0.230936	45	1985	0.84	1977	0.07
632	r1i1p1_GISS–E2–R–CC_RCP4.5_080.final.csv	[1861.0, 1883, 1890, 1922, 1948, 1976, 1997, 2015, 2024, 2036, 2050, 2071, 2083, 2100.0]	25	63	1	r1i1p1	GISS–E2–R–CC	RCP4.5	17	1997	1976	2015	17	31.0463	0.439617	72	1997	0.93	1996	0.06
633	r1i1p1_GISS–E2–R–CC_RCP4.5_080.final.csv	[1861.0, 1883, 1890, 1922, 1948, 1976, 1997, 2015, 2024, 2036, 2050, 2071, 2083, 2100.0]	25	63	1	r1i1p1	GISS–E2–R–CC	RCP4.5	17	2015	1997	2024	19	16.8282	0.234875	19	2015	0.81	2014	0.1
634	r1i1p1_GISS–E2–R–CC_RCP4.5_080.final.csv	[1861.0, 1883, 1890, 1922, 1948, 1976, 1997, 2015, 2024, 2036, 2050, 2071, 2083, 2100.0]	25	63	1	r1i1p1	GISS–E2–R–CC	RCP4.5	17	2024	2015	2036	19	15.2284	0.198974	100	2024	0.73	2023	0.26
635	r1i1p1_GISS–E2–R–CC_RCP4.5_080.final.csv	[1861.0, 1883, 1890, 1922, 1948, 1976, 1997, 2015, 2024, 2036, 2050, 2071, 2083, 2100.0]	25	63	1	r1i1p1	GISS–E2–R–CC	RCP4.5	17	2036	2024	2050	100	18.8829	0.192294	100	2036	0.98	2037	0.01
636	r1i1p1_GISS–E2–R–CC_RCP4.5_080.final.csv	[1861.0, 1883, 1890, 1922, 1948, 1976, 1997, 2015, 2024, 2036, 2050, 2071, 2083, 2100.0]	25	63	1	r1i1p1	GISS–E2–R–CC	RCP4.5	17	2050	2036	2071	100	23.3976	0.150105	100	2050	0.94	2045	0.03
637	r1i1p1_GISS–E2–R–CC_RCP4.5_080.final.csv	[1861.0, 1883, 1890, 1922, 1948, 1976, 1997, 2015, 2024, 2036, 2050, 2071, 2083, 2100.0]	25	63	1	r1i1p1	GISS–E2–R–CC	RCP4.5	17	2071	2050	2083	100	13.1717	0.072688	100	2071	0.99	2072	0.01
638	r1i1p1_GISS–E2–R–CC_RCP4.5_080.final.csv	[1861.0, 1883, 1890, 1922, 1948, 1976, 1997, 2015, 2024, 2036, 2050, 2071, 2083, 2100.0]	25	63	1	r1i1p1	GISS–E2–R–CC	RCP4.5	17	2083	2071	2100	100	14.8938	0.082343	100	2083	1	0	0
639	r1i1p1_GISS–E2–R–CC_RCP4.5_080.final.csv	[1861.0, 1883, 1890, 1922, 1948, 1985, 1997, 2015, 2024, 2036, 2050, 2071, 2083, 2100.0]	25	64	2	r1i1p1	GISS–E2–R–CC	RCP4.5	2	1883	1861	1890	100	19.5533	–0.218771724142	100	1883	1	0	0
640	r1i1p1_GISS–E2–R–CC_RCP4.5_080.final.csv	[1861.0, 1883, 1890, 1922, 1948, 1985, 1997, 2015, 2024, 2036, 2050, 2071, 2083, 2100.0]	25	64	2	r1i1p1	GISS–E2–R–CC	RCP4.5	2	1890	1883	1922	100	26.4489	0.284201	100	1890	0.93	1888	0.07
641	r1i1p1_GISS–E2–R–CC_RCP4.5_080.final.csv	[1861.0, 1883, 1890, 1922, 1948, 1985, 1997, 2015, 2024, 2036, 2050, 2071, 2083, 2100.0]	25	64	2	r1i1p1	GISS–E2–R–CC	RCP4.5	2	1922	1890	1948	100	29.2561	0.133452	100	1922	1	0	0
642	r1i1p1_GISS–E2–R–CC_RCP4.5_080.final.csv	[1861.0, 1883, 1890, 1922, 1948, 1985, 1997, 2015, 2024, 2036, 2050, 2071, 2083, 2100.0]	25	64	2	r1i1p1	GISS–E2–R–CC	RCP4.5	2	1948	1922	1985	55	19.7469	0.121755	100	1948	0.62	1949	0.14
643	r1i1p1_GISS–E2–R–CC_RCP4.5_080.final.csv	[1861.0, 1883, 1890, 1922, 1948, 1985, 1997, 2015, 2024, 2036, 2050, 2071, 2083, 2100.0]	25	64	2	r1i1p1	GISS–E2–R–CC	RCP4.5	2	1985	1948	1997	55	23.7787	0.230936	55	1985	0.84	1977	0.07
644	r1i1p1_GISS–E2–R–CC_RCP4.5_080.final.csv	[1861.0, 1883, 1890, 1922, 1948, 1985, 1997, 2015, 2024, 2036, 2050, 2071, 2083, 2100.0]	25	64	2	r1i1p1	GISS–E2–R–CC	RCP4.5	2	1997	1985	2015	2	23.2892	0.378442	72	1997	0.71	1998	0.29
645	r1i1p1_GISS–E2–R–CC_RCP4.5_080.final.csv	[1861.0, 1883, 1890, 1922, 1948, 1985, 1997, 2015, 2024, 2036, 2050, 2071, 2083, 2100.0]	25	64	2	r1i1p1	GISS–E2–R–CC	RCP4.5	2	2015	1997	2024	19	16.8282	0.234875	19	2015	0.81	2014	0.1
646	r1i1p1_GISS–E2–R–CC_RCP4.5_080.final.csv	[1861.0, 1883, 1890, 1922, 1948, 1985, 1997, 2015, 2024, 2036, 2050, 2071, 2083, 2100.0]	25	64	2	r1i1p1	GISS–E2–R–CC	RCP4.5	2	2024	2015	2036	19	15.2284	0.198974	100	2024	0.73	2023	0.26
647	r1i1p1_GISS–E2–R–CC_RCP4.5_080.final.csv	[1861.0, 1883, 1890, 1922, 1948, 1985, 1997, 2015, 2024, 2036, 2050, 2071, 2083, 2100.0]	25	64	2	r1i1p1	GISS–E2–R–CC	RCP4.5	2	2036	2024	2050	100	18.8829	0.192294	100	2036	0.98	2037	0.01
648	r1i1p1_GISS–E2–R–CC_RCP4.5_080.final.csv	[1861.0, 1883, 1890, 1922, 1948, 1985, 1997, 2015, 2024, 2036, 2050, 2071, 2083, 2100.0]	25	64	2	r1i1p1	GISS–E2–R–CC	RCP4.5	2	2050	2036	2071	100	23.3976	0.150105	100	2050	0.94	2045	0.03
649	r1i1p1_GISS–E2–R–CC_RCP4.5_080.final.csv	[1861.0, 1883, 1890, 1922, 1948, 1985, 1997, 2015, 2024, 2036, 2050, 2071, 2083, 2100.0]	25	64	2	r1i1p1	GISS–E2–R–CC	RCP4.5	2	2071	2050	2083	100	13.1717	0.072688	100	2071	0.99	2072	0.01
650	r1i1p1_GISS–E2–R–CC_RCP4.5_080.final.csv	[1861.0, 1883, 1890, 1922, 1948, 1985, 1997, 2015, 2024, 2036, 2050, 2071, 2083, 2100.0]	25	64	2	r1i1p1	GISS–E2–R–CC	RCP4.5	2	2083	2071	2100	100	14.8938	0.082343	100	2083	1	0	0
651	r1i1p1_GISS–E2–R–CC_RCP4.5_080.final.csv	[1861.0, 1883, 1890, 1922, 1948, 1976, 1996, 2006, 2017, 2024, 2036, 2050, 2071, 2083, 2100.0]	25	65	3	r1i1p1	GISS–E2–R–CC	RCP4.5	28	1883	1861	1890	100	19.5533	–0.218771724142	100	1883	1	0	0
652	r1i1p1_GISS–E2–R–CC_RCP4.5_080.final.csv	[1861.0, 1883, 1890, 1922, 1948, 1976, 1996, 2006, 2017, 2024, 2036, 2050, 2071, 2083, 2100.0]	25	65	3	r1i1p1	GISS–E2–R–CC	RCP4.5	28	1890	1883	1922	100	26.4489	0.284201	100	1890	0.93	1888	0.07
653	r1i1p1_GISS–E2–R–CC_RCP4.5_080.final.csv	[1861.0, 1883, 1890, 1922, 1948, 1976, 1996, 2006, 2017, 2024, 2036, 2050, 2071, 2083, 2100.0]	25	65	3	r1i1p1	GISS–E2–R–CC	RCP4.5	28	1922	1890	1948	100	29.2561	0.133452	100	1922	1	0	0
654	r1i1p1_GISS–E2–R–CC_RCP4.5_080.final.csv	[1861.0, 1883, 1890, 1922, 1948, 1976, 1996, 2006, 2017, 2024, 2036, 2050, 2071, 2083, 2100.0]	25	65	3	r1i1p1	GISS–E2–R–CC	RCP4.5	28	1948	1922	1976	45	13.8445	0.094077	100	1948	0.74	1946	0.13
655	r1i1p1_GISS–E2–R–CC_RCP4.5_080.final.csv	[1861.0, 1883, 1890, 1922, 1948, 1976, 1996, 2006, 2017, 2024, 2036, 2050, 2071, 2083, 2100.0]	25	65	3	r1i1p1	GISS–E2–R–CC	RCP4.5	28	1976	1948	1996	28	22.129	0.188809	45	1976	0.74	1985	0.22
656	r1i1p1_GISS–E2–R–CC_RCP4.5_080.final.csv	[1861.0, 1883, 1890, 1922, 1948, 1976, 1996, 2006, 2017, 2024, 2036, 2050, 2071, 2083, 2100.0]	25	65	3	r1i1p1	GISS–E2–R–CC	RCP4.5	28	1996	1976	2006	28	21.1715	0.360489	28	1996	0.49	1997	0.27
657	r1i1p1_GISS–E2–R–CC_RCP4.5_080.final.csv	[1861.0, 1883, 1890, 1922, 1948, 1976, 1996, 2006, 2017, 2024, 2036, 2050, 2071, 2083, 2100.0]	25	65	3	r1i1p1	GISS–E2–R–CC	RCP4.5	28	2006	1996	2017	28	12.4254	0.179807	81	2006	0.54	2004	0.37
658	r1i1p1_GISS–E2–R–CC_RCP4.5_080.final.csv	[1861.0, 1883, 1890, 1922, 1948, 1976, 1996, 2006, 2017, 2024, 2036, 2050, 2071, 2083, 2100.0]	25	65	3	r1i1p1	GISS–E2–R–CC	RCP4.5	28	2017	2006	2024	81	13.8375	0.168663	81	2017	0.81	2015	0.14
659	r1i1p1_GISS–E2–R–CC_RCP4.5_080.final.csv	[1861.0, 1883, 1890, 1922, 1948, 1976, 1996, 2006, 2017, 2024, 2036, 2050, 2071, 2083, 2100.0]	25	65	3	r1i1p1	GISS–E2–R–CC	RCP4.5	28	2024	2017	2036	81	13.3161	0.176605	100	2024	0.93	2023	0.06
660	r1i1p1_GISS–E2–R–CC_RCP4.5_080.final.csv	[1861.0, 1883, 1890, 1922, 1948, 1976, 1996, 2006, 2017, 2024, 2036, 2050, 2071, 2083, 2100.0]	25	65	3	r1i1p1	GISS–E2–R–CC	RCP4.5	28	2036	2024	2050	100	18.8829	0.192294	100	2036	0.98	2037	0.01
661	r1i1p1_GISS–E2–R–CC_RCP4.5_080.final.csv	[1861.0, 1883, 1890, 1922, 1948, 1976, 1996, 2006, 2017, 2024, 2036, 2050, 2071, 2083, 2100.0]	25	65	3	r1i1p1	GISS–E2–R–CC	RCP4.5	28	2050	2036	2071	100	23.3976	0.150105	100	2050	0.94	2045	0.03
662	r1i1p1_GISS–E2–R–CC_RCP4.5_080.final.csv	[1861.0, 1883, 1890, 1922, 1948, 1976, 1996, 2006, 2017, 2024, 2036, 2050, 2071, 2083, 2100.0]	25	65	3	r1i1p1	GISS–E2–R–CC	RCP4.5	28	2071	2050	2083	100	13.1717	0.072688	100	2071	0.99	2072	0.01
663	r1i1p1_GISS–E2–R–CC_RCP4.5_080.final.csv	[1861.0, 1883, 1890, 1922, 1948, 1976, 1996, 2006, 2017, 2024, 2036, 2050, 2071, 2083, 2100.0]	25	65	3	r1i1p1	GISS–E2–R–CC	RCP4.5	28	2083	2071	2100	100	14.8938	0.082343	100	2083	1	0	0
664	r1i1p1_GISS–E2–R–CC_RCP4.5_080.final.csv	[1861.0, 1883, 1890, 1922, 1948, 1985, 1997, 2006, 2017, 2024, 2036, 2050, 2071, 2083, 2100.0]	25	66	4	r1i1p1	GISS–E2–R–CC	RCP4.5	53	1883	1861	1890	100	19.5533	–0.218771724142	100	1883	1	0	0
665	r1i1p1_GISS–E2–R–CC_RCP4.5_080.final.csv	[1861.0, 1883, 1890, 1922, 1948, 1985, 1997, 2006, 2017, 2024, 2036, 2050, 2071, 2083, 2100.0]	25	66	4	r1i1p1	GISS–E2–R–CC	RCP4.5	53	1890	1883	1922	100	26.4489	0.284201	100	1890	0.93	1888	0.07
666	r1i1p1_GISS–E2–R–CC_RCP4.5_080.final.csv	[1861.0, 1883, 1890, 1922, 1948, 1985, 1997, 2006, 2017, 2024, 2036, 2050, 2071, 2083, 2100.0]	25	66	4	r1i1p1	GISS–E2–R–CC	RCP4.5	53	1922	1890	1948	100	29.2561	0.133452	100	1922	1	0	0
667	r1i1p1_GISS–E2–R–CC_RCP4.5_080.final.csv	[1861.0, 1883, 1890, 1922, 1948, 1985, 1997, 2006, 2017, 2024, 2036, 2050, 2071, 2083, 2100.0]	25	66	4	r1i1p1	GISS–E2–R–CC	RCP4.5	53	1948	1922	1985	55	19.7469	0.121755	100	1948	0.62	1949	0.14
668	r1i1p1_GISS–E2–R–CC_RCP4.5_080.final.csv	[1861.0, 1883, 1890, 1922, 1948, 1985, 1997, 2006, 2017, 2024, 2036, 2050, 2071, 2083, 2100.0]	25	66	4	r1i1p1	GISS–E2–R–CC	RCP4.5	53	1985	1948	1997	55	23.7787	0.230936	55	1985	0.84	1977	0.07
669	r1i1p1_GISS–E2–R–CC_RCP4.5_080.final.csv	[1861.0, 1883, 1890, 1922, 1948, 1985, 1997, 2006, 2017, 2024, 2036, 2050, 2071, 2083, 2100.0]	25	66	4	r1i1p1	GISS–E2–R–CC	RCP4.5	53	1997	1985	2006	53	15.0944	0.306699	72	1997	0.9	1996	0.08
670	r1i1p1_GISS–E2–R–CC_RCP4.5_080.final.csv	[1861.0, 1883, 1890, 1922, 1948, 1985, 1997, 2006, 2017, 2024, 2036, 2050, 2071, 2083, 2100.0]	25	66	4	r1i1p1	GISS–E2–R–CC	RCP4.5	53	2006	1997	2017	53	11.862	0.159487	81	2006	0.89	2005	0.06
671	r1i1p1_GISS–E2–R–CC_RCP4.5_080.final.csv	[1861.0, 1883, 1890, 1922, 1948, 1985, 1997, 2006, 2017, 2024, 2036, 2050, 2071, 2083, 2100.0]	25	66	4	r1i1p1	GISS–E2–R–CC	RCP4.5	53	2017	2006	2024	81	13.8375	0.168663	81	2017	0.81	2015	0.14
672	r1i1p1_GISS–E2–R–CC_RCP4.5_080.final.csv	[1861.0, 1883, 1890, 1922, 1948, 1985, 1997, 2006, 2017, 2024, 2036, 2050, 2071, 2083, 2100.0]	25	66	4	r1i1p1	GISS–E2–R–CC	RCP4.5	53	2024	2017	2036	81	13.3161	0.176605	100	2024	0.93	2023	0.06
673	r1i1p1_GISS–E2–R–CC_RCP4.5_080.final.csv	[1861.0, 1883, 1890, 1922, 1948, 1985, 1997, 2006, 2017, 2024, 2036, 2050, 2071, 2083, 2100.0]	25	66	4	r1i1p1	GISS–E2–R–CC	RCP4.5	53	2036	2024	2050	100	18.8829	0.192294	100	2036	0.98	2037	0.01
674	r1i1p1_GISS–E2–R–CC_RCP4.5_080.final.csv	[1861.0, 1883, 1890, 1922, 1948, 1985, 1997, 2006, 2017, 2024, 2036, 2050, 2071, 2083, 2100.0]	25	66	4	r1i1p1	GISS–E2–R–CC	RCP4.5	53	2050	2036	2071	100	23.3976	0.150105	100	2050	0.94	2045	0.03
675	r1i1p1_GISS–E2–R–CC_RCP4.5_080.final.csv	[1861.0, 1883, 1890, 1922, 1948, 1985, 1997, 2006, 2017, 2024, 2036, 2050, 2071, 2083, 2100.0]	25	66	4	r1i1p1	GISS–E2–R–CC	RCP4.5	53	2071	2050	2083	100	13.1717	0.072688	100	2071	0.99	2072	0.01
676	r1i1p1_GISS–E2–R–CC_RCP4.5_080.final.csv	[1861.0, 1883, 1890, 1922, 1948, 1985, 1997, 2006, 2017, 2024, 2036, 2050, 2071, 2083, 2100.0]	25	66	4	r1i1p1	GISS–E2–R–CC	RCP4.5	53	2083	2071	2100	100	14.8938	0.082343	100	2083	1	0	0
Seq	Source	BreakSet	DatasetNo	SetNo	SetNoInData	Type	Model	Treat	%BreakSet	Year	Predecessor	Successor	%SegmentFound	Ti	Shift	%YearOverall	ModalYear	ModalValue	SecondModalYear	SecondModalValue
677	r1i1p1_HadGEM2–AO_RCP4.5_081.final.csv	[1861.0, 1883, 1916, 1935, 1963, 1978, 2000, 2011, 2022, 2030, 2039, 2052, 2067, 2083, 2100.0]	26	67	1	r1i1p1	HadGEM2–AO	RCP4.5	2	1883	1861	1916	100	18.6886	–0.169754835696	100	1883	1	0	0
678	r1i1p1_HadGEM2–AO_RCP4.5_081.final.csv	[1861.0, 1883, 1916, 1935, 1963, 1978, 2000, 2011, 2022, 2030, 2039, 2052, 2067, 2083, 2100.0]	26	67	1	r1i1p1	HadGEM2–AO	RCP4.5	2	1916	1883	1935	100	26.9072	0.253559	100	1916	0.89	1917	0.11
679	r1i1p1_HadGEM2–AO_RCP4.5_081.final.csv	[1861.0, 1883, 1916, 1935, 1963, 1978, 2000, 2011, 2022, 2030, 2039, 2052, 2067, 2083, 2100.0]	26	67	1	r1i1p1	HadGEM2–AO	RCP4.5	2	1935	1916	1963	24	17.2516	0.117609	100	1935	0.93	1936	0.07
680	r1i1p1_HadGEM2–AO_RCP4.5_081.final.csv	[1861.0, 1883, 1916, 1935, 1963, 1978, 2000, 2011, 2022, 2030, 2039, 2052, 2067, 2083, 2100.0]	26	67	1	r1i1p1	HadGEM2–AO	RCP4.5	2	1963	1935	1978	6	31.4355	–0.271755633356	24	1963	0.97	1962	0.03
681	r1i1p1_HadGEM2–AO_RCP4.5_081.final.csv	[1861.0, 1883, 1916, 1935, 1963, 1978, 2000, 2011, 2022, 2030, 2039, 2052, 2067, 2083, 2100.0]	26	67	1	r1i1p1	HadGEM2–AO	RCP4.5	2	1978	1963	2000	2	24.7649	0.393637	6	1984	0.97	1979	0.02
682	r1i1p1_HadGEM2–AO_RCP4.5_081.final.csv	[1861.0, 1883, 1916, 1935, 1963, 1978, 2000, 2011, 2022, 2030, 2039, 2052, 2067, 2083, 2100.0]	26	67	1	r1i1p1	HadGEM2–AO	RCP4.5	2	2000	1978	2011	2	25.6751	0.6214	96	1998	0.5	2000	0.21
683	r1i1p1_HadGEM2–AO_RCP4.5_081.final.csv	[1861.0, 1883, 1916, 1935, 1963, 1978, 2000, 2011, 2022, 2030, 2039, 2052, 2067, 2083, 2100.0]	26	67	1	r1i1p1	HadGEM2–AO	RCP4.5	2	2011	2000	2022	96	12.6099	0.235541	100	2011	0.91	2009	0.05
684	r1i1p1_HadGEM2–AO_RCP4.5_081.final.csv	[1861.0, 1883, 1916, 1935, 1963, 1978, 2000, 2011, 2022, 2030, 2039, 2052, 2067, 2083, 2100.0]	26	67	1	r1i1p1	HadGEM2–AO	RCP4.5	2	2022	2011	2030	100	13.2311	0.2187	100	2022	1	0	0
685	r1i1p1_HadGEM2–AO_RCP4.5_081.final.csv	[1861.0, 1883, 1916, 1935, 1963, 1978, 2000, 2011, 2022, 2030, 2039, 2052, 2067, 2083, 2100.0]	26	67	1	r1i1p1	HadGEM2–AO	RCP4.5	2	2030	2022	2039	100	13.5445	0.302072	100	2030	0.95	2029	0.02
686	r1i1p1_HadGEM2–AO_RCP4.5_081.final.csv	[1861.0, 1883, 1916, 1935, 1963, 1978, 2000, 2011, 2022, 2030, 2039, 2052, 2067, 2083, 2100.0]	26	67	1	r1i1p1	HadGEM2–AO	RCP4.5	2	2039	2030	2052	100	14.0696	0.251324	100	2039	0.74	2040	0.22
687	r1i1p1_HadGEM2–AO_RCP4.5_081.final.csv	[1861.0, 1883, 1916, 1935, 1963, 1978, 2000, 2011, 2022, 2030, 2039, 2052, 2067, 2083, 2100.0]	26	67	1	r1i1p1	HadGEM2–AO	RCP4.5	2	2052	2039	2067	100	22.5727	0.444068	100	2052	0.96	2051	0.03
688	r1i1p1_HadGEM2–AO_RCP4.5_081.final.csv	[1861.0, 1883, 1916, 1935, 1963, 1978, 2000, 2011, 2022, 2030, 2039, 2052, 2067, 2083, 2100.0]	26	67	1	r1i1p1	HadGEM2–AO	RCP4.5	2	2067	2052	2083	100	23.3239	0.34287	100	2067	0.72	2064	0.16
689	r1i1p1_HadGEM2–AO_RCP4.5_081.final.csv	[1861.0, 1883, 1916, 1935, 1963, 1978, 2000, 2011, 2022, 2030, 2039, 2052, 2067, 2083, 2100.0]	26	67	1	r1i1p1	HadGEM2–AO	RCP4.5	2	2083	2067	2100	100	17.7242	0.187609	100	2083	0.98	2084	0.02
690	r1i1p1_HadGEM2–AO_RCP4.5_081.final.csv	[1861.0, 1883, 1916, 1935, 1963, 1978, 1998, 2011, 2022, 2030, 2039, 2052, 2067, 2083, 2100.0]	26	68	2	r1i1p1	HadGEM2–AO	RCP4.5	4	1883	1861	1916	100	18.6886	–0.169754835696	100	1883	1	0	0
691	r1i1p1_HadGEM2–AO_RCP4.5_081.final.csv	[1861.0, 1883, 1916, 1935, 1963, 1978, 1998, 2011, 2022, 2030, 2039, 2052, 2067, 2083, 2100.0]	26	68	2	r1i1p1	HadGEM2–AO	RCP4.5	4	1916	1883	1935	100	26.9072	0.253559	100	1916	0.89	1917	0.11
692	r1i1p1_HadGEM2–AO_RCP4.5_081.final.csv	[1861.0, 1883, 1916, 1935, 1963, 1978, 1998, 2011, 2022, 2030, 2039, 2052, 2067, 2083, 2100.0]	26	68	2	r1i1p1	HadGEM2–AO	RCP4.5	4	1935	1916	1963	24	17.2516	0.117609	100	1935	0.93	1936	0.07
693	r1i1p1_HadGEM2–AO_RCP4.5_081.final.csv	[1861.0, 1883, 1916, 1935, 1963, 1978, 1998, 2011, 2022, 2030, 2039, 2052, 2067, 2083, 2100.0]	26	68	2	r1i1p1	HadGEM2–AO	RCP4.5	4	1963	1935	1978	6	31.4355	–0.271755633356	24	1963	0.97	1962	0.03
694	r1i1p1_HadGEM2–AO_RCP4.5_081.final.csv	[1861.0, 1883, 1916, 1935, 1963, 1978, 1998, 2011, 2022, 2030, 2039, 2052, 2067, 2083, 2100.0]	26	68	2	r1i1p1	HadGEM2–AO	RCP4.5	4	1978	1963	1998	4	23.1922	0.359723	6	1984	0.64	1978	0.18
695	r1i1p1_HadGEM2–AO_RCP4.5_081.final.csv	[1861.0, 1883, 1916, 1935, 1963, 1978, 1998, 2011, 2022, 2030, 2039, 2052, 2067, 2083, 2100.0]	26	68	2	r1i1p1	HadGEM2–AO	RCP4.5	4	1998	1978	2011	4	25.6751	0.6214	4	1998	0.5	2000	0.21
696	r1i1p1_HadGEM2–AO_RCP4.5_081.final.csv	[1861.0, 1883, 1916, 1935, 1963, 1978, 1998, 2011, 2022, 2030, 2039, 2052, 2067, 2083, 2100.0]	26	68	2	r1i1p1	HadGEM2–AO	RCP4.5	4	2011	1998	2022	4	14.8249	0.379974	100	2003	0.67	2004	0.24
697	r1i1p1_HadGEM2–AO_RCP4.5_081.final.csv	[1861.0, 1883, 1916, 1935, 1963, 1978, 1998, 2011, 2022, 2030, 2039, 2052, 2067, 2083, 2100.0]	26	68	2	r1i1p1	HadGEM2–AO	RCP4.5	4	2022	2011	2030	100	13.2311	0.2187	100	2022	1	0	0
698	r1i1p1_HadGEM2–AO_RCP4.5_081.final.csv	[1861.0, 1883, 1916, 1935, 1963, 1978, 1998, 2011, 2022, 2030, 2039, 2052, 2067, 2083, 2100.0]	26	68	2	r1i1p1	HadGEM2–AO	RCP4.5	4	2030	2022	2039	100	13.5445	0.302072	100	2030	0.95	2029	0.02
699	r1i1p1_HadGEM2–AO_RCP4.5_081.final.csv	[1861.0, 1883, 1916, 1935, 1963, 1978, 1998, 2011, 2022, 2030, 2039, 2052, 2067, 2083, 2100.0]	26	68	2	r1i1p1	HadGEM2–AO	RCP4.5	4	2039	2030	2052	100	14.0696	0.251324	100	2039	0.74	2040	0.22
700	r1i1p1_HadGEM2–AO_RCP4.5_081.final.csv	[1861.0, 1883, 1916, 1935, 1963, 1978, 1998, 2011, 2022, 2030, 2039, 2052, 2067, 2083, 2100.0]	26	68	2	r1i1p1	HadGEM2–AO	RCP4.5	4	2052	2039	2067	100	22.5727	0.444068	100	2052	0.96	2051	0.03
701	r1i1p1_HadGEM2–AO_RCP4.5_081.final.csv	[1861.0, 1883, 1916, 1935, 1963, 1978, 1998, 2011, 2022, 2030, 2039, 2052, 2067, 2083, 2100.0]	26	68	2	r1i1p1	HadGEM2–AO	RCP4.5	4	2067	2052	2083	100	23.3239	0.34287	100	2067	0.72	2064	0.16
702	r1i1p1_HadGEM2–AO_RCP4.5_081.final.csv	[1861.0, 1883, 1916, 1935, 1963, 1978, 1998, 2011, 2022, 2030, 2039, 2052, 2067, 2083, 2100.0]	26	68	2	r1i1p1	HadGEM2–AO	RCP4.5	4	2083	2067	2100	100	17.7242	0.187609	100	2083	0.98	2084	0.02
703	r1i1p1_HadGEM2–AO_RCP4.5_081.final.csv	[1861.0, 1883, 1916, 1935, 1963, 1984, 2000, 2011, 2022, 2030, 2039, 2052, 2067, 2083, 2100.0]	26	69	3	r1i1p1	HadGEM2–AO	RCP4.5	18	1883	1861	1916	100	18.6886	–0.169754835696	100	1883	1	0	0
704	r1i1p1_HadGEM2–AO_RCP4.5_081.final.csv	[1861.0, 1883, 1916, 1935, 1963, 1984, 2000, 2011, 2022, 2030, 2039, 2052, 2067, 2083, 2100.0]	26	69	3	r1i1p1	HadGEM2–AO	RCP4.5	18	1916	1883	1935	100	26.9072	0.253559	100	1916	0.89	1917	0.11
705	r1i1p1_HadGEM2–AO_RCP4.5_081.final.csv	[1861.0, 1883, 1916, 1935, 1963, 1984, 2000, 2011, 2022, 2030, 2039, 2052, 2067, 2083, 2100.0]	26	69	3	r1i1p1	HadGEM2–AO	RCP4.5	18	1935	1916	1963	24	17.2516	0.117609	100	1935	0.93	1936	0.07
706	r1i1p1_HadGEM2–AO_RCP4.5_081.final.csv	[1861.0, 1883, 1916, 1935, 1963, 1984, 2000, 2011, 2022, 2030, 2039, 2052, 2067, 2083, 2100.0]	26	69	3	r1i1p1	HadGEM2–AO	RCP4.5	18	1963	1935	1984	18	26.2401	–0.211967494815	24	1962	0.83	1963	0.17
707	r1i1p1_HadGEM2–AO_RCP4.5_081.final.csv	[1861.0, 1883, 1916, 1935, 1963, 1984, 2000, 2011, 2022, 2030, 2039, 2052, 2067, 2083, 2100.0]	26	69	3	r1i1p1	HadGEM2–AO	RCP4.5	18	1984	1963	2000	18	24.7649	0.393637	94	1984	0.97	1979	0.02
708	r1i1p1_HadGEM2–AO_RCP4.5_081.final.csv	[1861.0, 1883, 1916, 1935, 1963, 1984, 2000, 2011, 2022, 2030, 2039, 2052, 2067, 2083, 2100.0]	26	69	3	r1i1p1	HadGEM2–AO	RCP4.5	18	2000	1984	2011	94	21.2832	0.573452	96	2000	0.8	1999	0.12
709	r1i1p1_HadGEM2–AO_RCP4.5_081.final.csv	[1861.0, 1883, 1916, 1935, 1963, 1984, 2000, 2011, 2022, 2030, 2039, 2052, 2067, 2083, 2100.0]	26	69	3	r1i1p1	HadGEM2–AO	RCP4.5	18	2011	2000	2022	96	12.6099	0.235541	100	2011	0.91	2009	0.05
710	r1i1p1_HadGEM2–AO_RCP4.5_081.final.csv	[1861.0, 1883, 1916, 1935, 1963, 1984, 2000, 2011, 2022, 2030, 2039, 2052, 2067, 2083, 2100.0]	26	69	3	r1i1p1	HadGEM2–AO	RCP4.5	18	2022	2011	2030	100	13.2311	0.2187	100	2022	1	0	0
711	r1i1p1_HadGEM2–AO_RCP4.5_081.final.csv	[1861.0, 1883, 1916, 1935, 1963, 1984, 2000, 2011, 2022, 2030, 2039, 2052, 2067, 2083, 2100.0]	26	69	3	r1i1p1	HadGEM2–AO	RCP4.5	18	2030	2022	2039	100	13.5445	0.302072	100	2030	0.95	2029	0.02
712	r1i1p1_HadGEM2–AO_RCP4.5_081.final.csv	[1861.0, 1883, 1916, 1935, 1963, 1984, 2000, 2011, 2022, 2030, 2039, 2052, 2067, 2083, 2100.0]	26	69	3	r1i1p1	HadGEM2–AO	RCP4.5	18	2039	2030	2052	100	14.0696	0.251324	100	2039	0.74	2040	0.22
713	r1i1p1_HadGEM2–AO_RCP4.5_081.final.csv	[1861.0, 1883, 1916, 1935, 1963, 1984, 2000, 2011, 2022, 2030, 2039, 2052, 2067, 2083, 2100.0]	26	69	3	r1i1p1	HadGEM2–AO	RCP4.5	18	2052	2039	2067	100	22.5727	0.444068	100	2052	0.96	2051	0.03
714	r1i1p1_HadGEM2–AO_RCP4.5_081.final.csv	[1861.0, 1883, 1916, 1935, 1963, 1984, 2000, 2011, 2022, 2030, 2039, 2052, 2067, 2083, 2100.0]	26	69	3	r1i1p1	HadGEM2–AO	RCP4.5	18	2067	2052	2083	100	23.3239	0.34287	100	2067	0.72	2064	0.16
715	r1i1p1_HadGEM2–AO_RCP4.5_081.final.csv	[1861.0, 1883, 1916, 1935, 1963, 1984, 2000, 2011, 2022, 2030, 2039, 2052, 2067, 2083, 2100.0]	26	69	3	r1i1p1	HadGEM2–AO	RCP4.5	18	2083	2067	2100	100	17.7242	0.187609	100	2083	0.98	2084	0.02
716	r1i1p1_HadGEM2–AO_RCP4.5_081.final.csv	[1861.0, 1883, 1916, 1935, 1962, 1984, 2000, 2011, 2022, 2030, 2039, 2052, 2067, 2083, 2100.0]	26	70	4	r1i1p1	HadGEM2–AO	RCP4.5	76	1883	1861	1916	100	18.6886	–0.169754835696	100	1883	1	0	0
717	r1i1p1_HadGEM2–AO_RCP4.5_081.final.csv	[1861.0, 1883, 1916, 1935, 1962, 1984, 2000, 2011, 2022, 2030, 2039, 2052, 2067, 2083, 2100.0]	26	70	4	r1i1p1	HadGEM2–AO	RCP4.5	76	1916	1883	1935	100	26.9072	0.253559	100	1916	0.89	1917	0.11
718	r1i1p1_HadGEM2–AO_RCP4.5_081.final.csv	[1861.0, 1883, 1916, 1935, 1962, 1984, 2000, 2011, 2022, 2030, 2039, 2052, 2067, 2083, 2100.0]	26	70	4	r1i1p1	HadGEM2–AO	RCP4.5	76	1935	1916	1962	76	17.9779	0.121612	100	1935	0.95	1936	0.05
719	r1i1p1_HadGEM2–AO_RCP4.5_081.final.csv	[1861.0, 1883, 1916, 1935, 1962, 1984, 2000, 2011, 2022, 2030, 2039, 2052, 2067, 2083, 2100.0]	26	70	4	r1i1p1	HadGEM2–AO	RCP4.5	76	1962	1935	1984	76	26.2401	–0.211967494815	76	1962	0.83	1963	0.17
720	r1i1p1_HadGEM2–AO_RCP4.5_081.final.csv	[1861.0, 1883, 1916, 1935, 1962, 1984, 2000, 2011, 2022, 2030, 2039, 2052, 2067, 2083, 2100.0]	26	70	4	r1i1p1	HadGEM2–AO	RCP4.5	76	1984	1962	2000	76	25.331	0.389684	94	1984	0.99	1979	0.01
721	r1i1p1_HadGEM2–AO_RCP4.5_081.final.csv	[1861.0, 1883, 1916, 1935, 1962, 1984, 2000, 2011, 2022, 2030, 2039, 2052, 2067, 2083, 2100.0]	26	70	4	r1i1p1	HadGEM2–AO	RCP4.5	76	2000	1984	2011	94	21.2832	0.573452	96	2000	0.8	1999	0.12
722	r1i1p1_HadGEM2–AO_RCP4.5_081.final.csv	[1861.0, 1883, 1916, 1935, 1962, 1984, 2000, 2011, 2022, 2030, 2039, 2052, 2067, 2083, 2100.0]	26	70	4	r1i1p1	HadGEM2–AO	RCP4.5	76	2011	2000	2022	96	12.6099	0.235541	100	2011	0.91	2009	0.05
723	r1i1p1_HadGEM2–AO_RCP4.5_081.final.csv	[1861.0, 1883, 1916, 1935, 1962, 1984, 2000, 2011, 2022, 2030, 2039, 2052, 2067, 2083, 2100.0]	26	70	4	r1i1p1	HadGEM2–AO	RCP4.5	76	2022	2011	2030	100	13.2311	0.2187	100	2022	1	0	0
724	r1i1p1_HadGEM2–AO_RCP4.5_081.final.csv	[1861.0, 1883, 1916, 1935, 1962, 1984, 2000, 2011, 2022, 2030, 2039, 2052, 2067, 2083, 2100.0]	26	70	4	r1i1p1	HadGEM2–AO	RCP4.5	76	2030	2022	2039	100	13.5445	0.302072	100	2030	0.95	2029	0.02
725	r1i1p1_HadGEM2–AO_RCP4.5_081.final.csv	[1861.0, 1883, 1916, 1935, 1962, 1984, 2000, 2011, 2022, 2030, 2039, 2052, 2067, 2083, 2100.0]	26	70	4	r1i1p1	HadGEM2–AO	RCP4.5	76	2039	2030	2052	100	14.0696	0.251324	100	2039	0.74	2040	0.22
726	r1i1p1_HadGEM2–AO_RCP4.5_081.final.csv	[1861.0, 1883, 1916, 1935, 1962, 1984, 2000, 2011, 2022, 2030, 2039, 2052, 2067, 2083, 2100.0]	26	70	4	r1i1p1	HadGEM2–AO	RCP4.5	76	2052	2039	2067	100	22.5727	0.444068	100	2052	0.96	2051	0.03
727	r1i1p1_HadGEM2–AO_RCP4.5_081.final.csv	[1861.0, 1883, 1916, 1935, 1962, 1984, 2000, 2011, 2022, 2030, 2039, 2052, 2067, 2083, 2100.0]	26	70	4	r1i1p1	HadGEM2–AO	RCP4.5	76	2067	2052	2083	100	23.3239	0.34287	100	2067	0.72	2064	0.16
728	r1i1p1_HadGEM2–AO_RCP4.5_081.final.csv	[1861.0, 1883, 1916, 1935, 1962, 1984, 2000, 2011, 2022, 2030, 2039, 2052, 2067, 2083, 2100.0]	26	70	4	r1i1p1	HadGEM2–AO	RCP4.5	76	2083	2067	2100	100	17.7242	0.187609	100	2083	0.98	2084	0.02
Seq	Source	BreakSet	DatasetNo	SetNo	SetNoInData	Type	Model	Treat	%BreakSet	Year	Predecessor	Successor	%SegmentFound	Ti	Shift	%YearOverall	ModalYear	ModalValue	SecondModalYear	SecondModalValue
729	r1i1p1_HadGEM2–CC_RCP4.5_082.final.csv	[1861.0, 1874, 1985, 1997, 2009, 2018, 2034, 2044, 2057, 2075, 2100.0]	27	71	1	r1i1p1	HadGEM2–CC	RCP4.5	95	1874	1861	1985	100	27.0111	–0.214121986756	100	1874	1	0	0
730	r1i1p1_HadGEM2–CC_RCP4.5_082.final.csv	[1861.0, 1874, 1985, 1997, 2009, 2018, 2034, 2044, 2057, 2075, 2100.0]	27	71	1	r1i1p1	HadGEM2–CC	RCP4.5	95	1985	1874	1997	100	33.0342	0.262505	100	1985	0.93	1984	0.06
731	r1i1p1_HadGEM2–CC_RCP4.5_082.final.csv	[1861.0, 1874, 1985, 1997, 2009, 2018, 2034, 2044, 2057, 2075, 2100.0]	27	71	1	r1i1p1	HadGEM2–CC	RCP4.5	95	1997	1985	2009	100	15.5054	0.219377	100	1997	0.92	1998	0.06
732	r1i1p1_HadGEM2–CC_RCP4.5_082.final.csv	[1861.0, 1874, 1985, 1997, 2009, 2018, 2034, 2044, 2057, 2075, 2100.0]	27	71	1	r1i1p1	HadGEM2–CC	RCP4.5	95	2009	1997	2018	100	16.9126	0.319745	100	2009	1	0	0
733	r1i1p1_HadGEM2–CC_RCP4.5_082.final.csv	[1861.0, 1874, 1985, 1997, 2009, 2018, 2034, 2044, 2057, 2075, 2100.0]	27	71	1	r1i1p1	HadGEM2–CC	RCP4.5	95	2018	2009	2034	95	19.9766	0.444481	100	2018	0.99	2019	0.01
734	r1i1p1_HadGEM2–CC_RCP4.5_082.final.csv	[1861.0, 1874, 1985, 1997, 2009, 2018, 2034, 2044, 2057, 2075, 2100.0]	27	71	1	r1i1p1	HadGEM2–CC	RCP4.5	95	2034	2018	2044	95	20.371	0.410723	100	2034	1	0	0
735	r1i1p1_HadGEM2–CC_RCP4.5_082.final.csv	[1861.0, 1874, 1985, 1997, 2009, 2018, 2034, 2044, 2057, 2075, 2100.0]	27	71	1	r1i1p1	HadGEM2–CC	RCP4.5	95	2044	2034	2057	100	18.1333	0.341969	100	2044	0.95	2046	0.05
736	r1i1p1_HadGEM2–CC_RCP4.5_082.final.csv	[1861.0, 1874, 1985, 1997, 2009, 2018, 2034, 2044, 2057, 2075, 2100.0]	27	71	1	r1i1p1	HadGEM2–CC	RCP4.5	95	2057	2044	2075	100	24.1696	0.349764	100	2057	0.97	2058	0.03
737	r1i1p1_HadGEM2–CC_RCP4.5_082.final.csv	[1861.0, 1874, 1985, 1997, 2009, 2018, 2034, 2044, 2057, 2075, 2100.0]	27	71	1	r1i1p1	HadGEM2–CC	RCP4.5	95	2075	2057	2100	100	32.1001	0.291823	100	2075	0.95	2074	0.03
738	r1i1p1_HadGEM2–CC_RCP4.5_082.final.csv	[1861.0, 1874, 1985, 1997, 2009, 2018, 2025, 2034, 2044, 2057, 2075, 2100.0]	27	72	2	r1i1p1	HadGEM2–CC	RCP4.5	5	1874	1861	1985	100	27.0111	–0.214121986756	100	1874	1	0	0
739	r1i1p1_HadGEM2–CC_RCP4.5_082.final.csv	[1861.0, 1874, 1985, 1997, 2009, 2018, 2025, 2034, 2044, 2057, 2075, 2100.0]	27	72	2	r1i1p1	HadGEM2–CC	RCP4.5	5	1985	1874	1997	100	33.0342	0.262505	100	1985	0.93	1984	0.06
740	r1i1p1_HadGEM2–CC_RCP4.5_082.final.csv	[1861.0, 1874, 1985, 1997, 2009, 2018, 2025, 2034, 2044, 2057, 2075, 2100.0]	27	72	2	r1i1p1	HadGEM2–CC	RCP4.5	5	1997	1985	2009	100	15.5054	0.219377	100	1997	0.92	1998	0.06
741	r1i1p1_HadGEM2–CC_RCP4.5_082.final.csv	[1861.0, 1874, 1985, 1997, 2009, 2018, 2025, 2034, 2044, 2057, 2075, 2100.0]	27	72	2	r1i1p1	HadGEM2–CC	RCP4.5	5	2009	1997	2018	100	16.9126	0.319745	100	2009	1	0	0
742	r1i1p1_HadGEM2–CC_RCP4.5_082.final.csv	[1861.0, 1874, 1985, 1997, 2009, 2018, 2025, 2034, 2044, 2057, 2075, 2100.0]	27	72	2	r1i1p1	HadGEM2–CC	RCP4.5	5	2018	2009	2025	5	12.9945	0.344987	100	2018	0.99	2017	0.01
743	r1i1p1_HadGEM2–CC_RCP4.5_082.final.csv	[1861.0, 1874, 1985, 1997, 2009, 2018, 2025, 2034, 2044, 2057, 2075, 2100.0]	27	72	2	r1i1p1	HadGEM2–CC	RCP4.5	5	2025	2018	2034	5	10.6044	0.181395	5	2025	0.84	2026	0.13
744	r1i1p1_HadGEM2–CC_RCP4.5_082.final.csv	[1861.0, 1874, 1985, 1997, 2009, 2018, 2025, 2034, 2044, 2057, 2075, 2100.0]	27	72	2	r1i1p1	HadGEM2–CC	RCP4.5	5	2034	2025	2044	5	15.4816	0.331048	100	2034	0.94	2035	0.06
745	r1i1p1_HadGEM2–CC_RCP4.5_082.final.csv	[1861.0, 1874, 1985, 1997, 2009, 2018, 2025, 2034, 2044, 2057, 2075, 2100.0]	27	72	2	r1i1p1	HadGEM2–CC	RCP4.5	5	2044	2034	2057	100	18.1333	0.341969	100	2044	0.95	2046	0.05
746	r1i1p1_HadGEM2–CC_RCP4.5_082.final.csv	[1861.0, 1874, 1985, 1997, 2009, 2018, 2025, 2034, 2044, 2057, 2075, 2100.0]	27	72	2	r1i1p1	HadGEM2–CC	RCP4.5	5	2057	2044	2075	100	24.1696	0.349764	100	2057	0.97	2058	0.03
747	r1i1p1_HadGEM2–CC_RCP4.5_082.final.csv	[1861.0, 1874, 1985, 1997, 2009, 2018, 2025, 2034, 2044, 2057, 2075, 2100.0]	27	72	2	r1i1p1	HadGEM2–CC	RCP4.5	5	2075	2057	2100	100	32.1001	0.291823	100	2075	0.95	2074	0.03
Seq	Source	BreakSet	DatasetNo	SetNo	SetNoInData	Type	Model	Treat	%BreakSet	Year	Predecessor	Successor	%SegmentFound	Ti	Shift	%YearOverall	ModalYear	ModalValue	SecondModalYear	SecondModalValue
748	r1i1p1_HadGEM2–ES_RCP4.5_083.final.csv	[1861.0, 1915, 1936, 1953, 1984, 1997, 2005, 2015, 2029, 2041, 2055, 2070, 2100.0]	28	73	1	r1i1p1	HadGEM2–ES	RCP4.5	43	1915	1861	1936	100	13.742	0.11983	100	1915	0.76	1913	0.23
749	r1i1p1_HadGEM2–ES_RCP4.5_083.final.csv	[1861.0, 1915, 1936, 1953, 1984, 1997, 2005, 2015, 2029, 2041, 2055, 2070, 2100.0]	28	73	1	r1i1p1	HadGEM2–ES	RCP4.5	43	1936	1915	1953	100	18.2163	0.166542	100	1936	0.95	1934	0.02
750	r1i1p1_HadGEM2–ES_RCP4.5_083.final.csv	[1861.0, 1915, 1936, 1953, 1984, 1997, 2005, 2015, 2029, 2041, 2055, 2070, 2100.0]	28	73	1	r1i1p1	HadGEM2–ES	RCP4.5	43	1953	1936	1984	100	29.5916	–0.279147307737	100	1953	0.99	1954	0.01
751	r1i1p1_HadGEM2–ES_RCP4.5_083.final.csv	[1861.0, 1915, 1936, 1953, 1984, 1997, 2005, 2015, 2029, 2041, 2055, 2070, 2100.0]	28	73	1	r1i1p1	HadGEM2–ES	RCP4.5	43	1984	1953	1997	95	24.5881	0.268775	100	1984	0.92	1983	0.08
752	r1i1p1_HadGEM2–ES_RCP4.5_083.final.csv	[1861.0, 1915, 1936, 1953, 1984, 1997, 2005, 2015, 2029, 2041, 2055, 2070, 2100.0]	28	73	1	r1i1p1	HadGEM2–ES	RCP4.5	43	1997	1984	2005	43	14.8357	0.319538	95	1997	0.58	1994	0.35
753	r1i1p1_HadGEM2–ES_RCP4.5_083.final.csv	[1861.0, 1915, 1936, 1953, 1984, 1997, 2005, 2015, 2029, 2041, 2055, 2070, 2100.0]	28	73	1	r1i1p1	HadGEM2–ES	RCP4.5	43	2005	1997	2015	43	13.8655	0.355517	48	2006	0.58	2005	0.42
754	r1i1p1_HadGEM2–ES_RCP4.5_083.final.csv	[1861.0, 1915, 1936, 1953, 1984, 1997, 2005, 2015, 2029, 2041, 2055, 2070, 2100.0]	28	73	1	r1i1p1	HadGEM2–ES	RCP4.5	43	2015	2005	2029	48	18.3962	0.371814	100	2015	1	0	0
755	r1i1p1_HadGEM2–ES_RCP4.5_083.final.csv	[1861.0, 1915, 1936, 1953, 1984, 1997, 2005, 2015, 2029, 2041, 2055, 2070, 2100.0]	28	73	1	r1i1p1	HadGEM2–ES	RCP4.5	43	2029	2015	2041	100	18.884	0.358476	100	2029	0.76	2030	0.21
756	r1i1p1_HadGEM2–ES_RCP4.5_083.final.csv	[1861.0, 1915, 1936, 1953, 1984, 1997, 2005, 2015, 2029, 2041, 2055, 2070, 2100.0]	28	73	1	r1i1p1	HadGEM2–ES	RCP4.5	43	2041	2029	2055	100	21.514	0.485186	100	2041	0.97	2040	0.03
757	r1i1p1_HadGEM2–ES_RCP4.5_083.final.csv	[1861.0, 1915, 1936, 1953, 1984, 1997, 2005, 2015, 2029, 2041, 2055, 2070, 2100.0]	28	73	1	r1i1p1	HadGEM2–ES	RCP4.5	43	2055	2041	2070	100	22.4825	0.439492	100	2055	0.72	2054	0.27
758	r1i1p1_HadGEM2–ES_RCP4.5_083.final.csv	[1861.0, 1915, 1936, 1953, 1984, 1997, 2005, 2015, 2029, 2041, 2055, 2070, 2100.0]	28	73	1	r1i1p1	HadGEM2–ES	RCP4.5	43	2070	2055	2100	100	32.6767	0.376356	100	2070	0.68	2069	0.26
759	r1i1p1_HadGEM2–ES_RCP4.5_083.final.csv	[1861.0, 1915, 1936, 1953, 1984, 1997, 2006, 2015, 2029, 2041, 2055, 2070, 2100.0]	28	74	2	r1i1p1	HadGEM2–ES	RCP4.5	52	1915	1861	1936	100	13.742	0.11983	100	1915	0.76	1913	0.23
760	r1i1p1_HadGEM2–ES_RCP4.5_083.final.csv	[1861.0, 1915, 1936, 1953, 1984, 1997, 2006, 2015, 2029, 2041, 2055, 2070, 2100.0]	28	74	2	r1i1p1	HadGEM2–ES	RCP4.5	52	1936	1915	1953	100	18.2163	0.166542	100	1936	0.95	1934	0.02
761	r1i1p1_HadGEM2–ES_RCP4.5_083.final.csv	[1861.0, 1915, 1936, 1953, 1984, 1997, 2006, 2015, 2029, 2041, 2055, 2070, 2100.0]	28	74	2	r1i1p1	HadGEM2–ES	RCP4.5	52	1953	1936	1984	100	29.5916	–0.279147307737	100	1953	0.99	1954	0.01
762	r1i1p1_HadGEM2–ES_RCP4.5_083.final.csv	[1861.0, 1915, 1936, 1953, 1984, 1997, 2006, 2015, 2029, 2041, 2055, 2070, 2100.0]	28	74	2	r1i1p1	HadGEM2–ES	RCP4.5	52	1984	1953	1997	95	24.5881	0.268775	100	1984	0.92	1983	0.08
763	r1i1p1_HadGEM2–ES_RCP4.5_083.final.csv	[1861.0, 1915, 1936, 1953, 1984, 1997, 2006, 2015, 2029, 2041, 2055, 2070, 2100.0]	28	74	2	r1i1p1	HadGEM2–ES	RCP4.5	52	1997	1984	2006	52	15.5614	0.338598	95	1997	0.77	1999	0.08
764	r1i1p1_HadGEM2–ES_RCP4.5_083.final.csv	[1861.0, 1915, 1936, 1953, 1984, 1997, 2006, 2015, 2029, 2041, 2055, 2070, 2100.0]	28	74	2	r1i1p1	HadGEM2–ES	RCP4.5	52	2006	1997	2015	52	13.8655	0.355517	52	2006	0.58	2005	0.42
765	r1i1p1_HadGEM2–ES_RCP4.5_083.final.csv	[1861.0, 1915, 1936, 1953, 1984, 1997, 2006, 2015, 2029, 2041, 2055, 2070, 2100.0]	28	74	2	r1i1p1	HadGEM2–ES	RCP4.5	52	2015	2006	2029	52	17.5746	0.351741	100	2015	1	0	0
766	r1i1p1_HadGEM2–ES_RCP4.5_083.final.csv	[1861.0, 1915, 1936, 1953, 1984, 1997, 2006, 2015, 2029, 2041, 2055, 2070, 2100.0]	28	74	2	r1i1p1	HadGEM2–ES	RCP4.5	52	2029	2015	2041	100	18.884	0.358476	100	2029	0.76	2030	0.21
767	r1i1p1_HadGEM2–ES_RCP4.5_083.final.csv	[1861.0, 1915, 1936, 1953, 1984, 1997, 2006, 2015, 2029, 2041, 2055, 2070, 2100.0]	28	74	2	r1i1p1	HadGEM2–ES	RCP4.5	52	2041	2029	2055	100	21.514	0.485186	100	2041	0.97	2040	0.03
768	r1i1p1_HadGEM2–ES_RCP4.5_083.final.csv	[1861.0, 1915, 1936, 1953, 1984, 1997, 2006, 2015, 2029, 2041, 2055, 2070, 2100.0]	28	74	2	r1i1p1	HadGEM2–ES	RCP4.5	52	2055	2041	2070	100	22.4825	0.439492	100	2055	0.72	2054	0.27
769	r1i1p1_HadGEM2–ES_RCP4.5_083.final.csv	[1861.0, 1915, 1936, 1953, 1984, 1997, 2006, 2015, 2029, 2041, 2055, 2070, 2100.0]	28	74	2	r1i1p1	HadGEM2–ES	RCP4.5	52	2070	2055	2100	100	32.6767	0.376356	100	2070	0.68	2069	0.26
770	r1i1p1_HadGEM2–ES_RCP4.5_083.final.csv	[1861.0, 1915, 1936, 1953, 1984, 1994, 2005, 2015, 2029, 2041, 2055, 2070, 2100.0]	28	75	3	r1i1p1	HadGEM2–ES	RCP4.5	5	1915	1861	1936	100	13.742	0.11983	100	1915	0.76	1913	0.23
771	r1i1p1_HadGEM2–ES_RCP4.5_083.final.csv	[1861.0, 1915, 1936, 1953, 1984, 1994, 2005, 2015, 2029, 2041, 2055, 2070, 2100.0]	28	75	3	r1i1p1	HadGEM2–ES	RCP4.5	5	1936	1915	1953	100	18.2163	0.166542	100	1936	0.95	1934	0.02
772	r1i1p1_HadGEM2–ES_RCP4.5_083.final.csv	[1861.0, 1915, 1936, 1953, 1984, 1994, 2005, 2015, 2029, 2041, 2055, 2070, 2100.0]	28	75	3	r1i1p1	HadGEM2–ES	RCP4.5	5	1953	1936	1984	100	29.5916	–0.279147307737	100	1953	0.99	1954	0.01
773	r1i1p1_HadGEM2–ES_RCP4.5_083.final.csv	[1861.0, 1915, 1936, 1953, 1984, 1994, 2005, 2015, 2029, 2041, 2055, 2070, 2100.0]	28	75	3	r1i1p1	HadGEM2–ES	RCP4.5	5	1984	1953	1994	5	19.4488	0.228336	100	1984	0.75	1983	0.25
774	r1i1p1_HadGEM2–ES_RCP4.5_083.final.csv	[1861.0, 1915, 1936, 1953, 1984, 1994, 2005, 2015, 2029, 2041, 2055, 2070, 2100.0]	28	75	3	r1i1p1	HadGEM2–ES	RCP4.5	5	1994	1984	2005	5	14.8357	0.319538	5	1997	0.58	1994	0.35
775	r1i1p1_HadGEM2–ES_RCP4.5_083.final.csv	[1861.0, 1915, 1936, 1953, 1984, 1994, 2005, 2015, 2029, 2041, 2055, 2070, 2100.0]	28	75	3	r1i1p1	HadGEM2–ES	RCP4.5	5	2005	1994	2015	5	16.0987	0.405564	48	2005	0.91	2006	0.09
776	r1i1p1_HadGEM2–ES_RCP4.5_083.final.csv	[1861.0, 1915, 1936, 1953, 1984, 1994, 2005, 2015, 2029, 2041, 2055, 2070, 2100.0]	28	75	3	r1i1p1	HadGEM2–ES	RCP4.5	5	2015	2005	2029	48	18.3962	0.371814	100	2015	1	0	0
777	r1i1p1_HadGEM2–ES_RCP4.5_083.final.csv	[1861.0, 1915, 1936, 1953, 1984, 1994, 2005, 2015, 2029, 2041, 2055, 2070, 2100.0]	28	75	3	r1i1p1	HadGEM2–ES	RCP4.5	5	2029	2015	2041	100	18.884	0.358476	100	2029	0.76	2030	0.21
778	r1i1p1_HadGEM2–ES_RCP4.5_083.final.csv	[1861.0, 1915, 1936, 1953, 1984, 1994, 2005, 2015, 2029, 2041, 2055, 2070, 2100.0]	28	75	3	r1i1p1	HadGEM2–ES	RCP4.5	5	2041	2029	2055	100	21.514	0.485186	100	2041	0.97	2040	0.03
779	r1i1p1_HadGEM2–ES_RCP4.5_083.final.csv	[1861.0, 1915, 1936, 1953, 1984, 1994, 2005, 2015, 2029, 2041, 2055, 2070, 2100.0]	28	75	3	r1i1p1	HadGEM2–ES	RCP4.5	5	2055	2041	2070	100	22.4825	0.439492	100	2055	0.72	2054	0.27
780	r1i1p1_HadGEM2–ES_RCP4.5_083.final.csv	[1861.0, 1915, 1936, 1953, 1984, 1994, 2005, 2015, 2029, 2041, 2055, 2070, 2100.0]	28	75	3	r1i1p1	HadGEM2–ES	RCP4.5	5	2070	2055	2100	100	32.6767	0.376356	100	2070	0.68	2069	0.26
Seq	Source	BreakSet	DatasetNo	SetNo	SetNoInData	Type	Model	Treat	%BreakSet	Year	Predecessor	Successor	%SegmentFound	Ti	Shift	%YearOverall	ModalYear	ModalValue	SecondModalYear	SecondModalValue
781	r1i1p1_inmcm4_RCP4.5_087.final.csv	[1861.0, 1924, 1934, 1957, 1978, 1993, 2006, 2024, 2034, 2047, 2059, 2069, 2076, 2100.0]	29	76	1	r1i1p1	inmcm4	RCP4.5	11	1924	1861	1934	11	27.0798	0.149279	100	1924	1	0	0
782	r1i1p1_inmcm4_RCP4.5_087.final.csv	[1861.0, 1924, 1934, 1957, 1978, 1993, 2006, 2024, 2034, 2047, 2059, 2069, 2076, 2100.0]	29	76	1	r1i1p1	inmcm4	RCP4.5	11	1934	1924	1957	11	10.7215	0.0740717	11	1934	0.98	1937	0.02
783	r1i1p1_inmcm4_RCP4.5_087.final.csv	[1861.0, 1924, 1934, 1957, 1978, 1993, 2006, 2024, 2034, 2047, 2059, 2069, 2076, 2100.0]	29	76	1	r1i1p1	inmcm4	RCP4.5	11	1957	1934	1978	11	20.0397	0.112862	100	1957	0.75	1959	0.22
784	r1i1p1_inmcm4_RCP4.5_087.final.csv	[1861.0, 1924, 1934, 1957, 1978, 1993, 2006, 2024, 2034, 2047, 2059, 2069, 2076, 2100.0]	29	76	1	r1i1p1	inmcm4	RCP4.5	11	1978	1957	1993	100	23.08	0.16424	100	1978	1	0	0
785	r1i1p1_inmcm4_RCP4.5_087.final.csv	[1861.0, 1924, 1934, 1957, 1978, 1993, 2006, 2024, 2034, 2047, 2059, 2069, 2076, 2100.0]	29	76	1	r1i1p1	inmcm4	RCP4.5	11	1993	1978	2006	99	18.488	0.143893	100	1993	0.94	1998	0.04
786	r1i1p1_inmcm4_RCP4.5_087.final.csv	[1861.0, 1924, 1934, 1957, 1978, 1993, 2006, 2024, 2034, 2047, 2059, 2069, 2076, 2100.0]	29	76	1	r1i1p1	inmcm4	RCP4.5	11	2006	1993	2024	99	20.4263	0.162438	99	2006	0.6	2003	0.4
787	r1i1p1_inmcm4_RCP4.5_087.final.csv	[1861.0, 1924, 1934, 1957, 1978, 1993, 2006, 2024, 2034, 2047, 2059, 2069, 2076, 2100.0]	29	76	1	r1i1p1	inmcm4	RCP4.5	11	2024	2006	2034	99	22.4102	0.231262	100	2024	0.99	2023	0.01
788	r1i1p1_inmcm4_RCP4.5_087.final.csv	[1861.0, 1924, 1934, 1957, 1978, 1993, 2006, 2024, 2034, 2047, 2059, 2069, 2076, 2100.0]	29	76	1	r1i1p1	inmcm4	RCP4.5	11	2034	2024	2047	100	17.8275	0.187579	100	2034	0.99	2033	0.01
789	r1i1p1_inmcm4_RCP4.5_087.final.csv	[1861.0, 1924, 1934, 1957, 1978, 1993, 2006, 2024, 2034, 2047, 2059, 2069, 2076, 2100.0]	29	76	1	r1i1p1	inmcm4	RCP4.5	11	2047	2034	2059	100	18.8135	0.17826	100	2047	0.91	2048	0.07
790	r1i1p1_inmcm4_RCP4.5_087.final.csv	[1861.0, 1924, 1934, 1957, 1978, 1993, 2006, 2024, 2034, 2047, 2059, 2069, 2076, 2100.0]	29	76	1	r1i1p1	inmcm4	RCP4.5	11	2059	2047	2069	100	14.9429	0.149242	100	2059	0.99	2058	0.01
791	r1i1p1_inmcm4_RCP4.5_087.final.csv	[1861.0, 1924, 1934, 1957, 1978, 1993, 2006, 2024, 2034, 2047, 2059, 2069, 2076, 2100.0]	29	76	1	r1i1p1	inmcm4	RCP4.5	11	2069	2059	2076	100	11.4569	0.135384	100	2069	0.99	2068	0.01
792	r1i1p1_inmcm4_RCP4.5_087.final.csv	[1861.0, 1924, 1934, 1957, 1978, 1993, 2006, 2024, 2034, 2047, 2059, 2069, 2076, 2100.0]	29	76	1	r1i1p1	inmcm4	RCP4.5	11	2076	2069	2100	100	17.1218	0.131918	100	2076	0.99	2075	0.01
793	r1i1p1_inmcm4_RCP4.5_087.final.csv	[1861.0, 1924, 1957, 1978, 1993, 2006, 2024, 2034, 2047, 2059, 2069, 2076, 2100.0]	29	77	2	r1i1p1	inmcm4	RCP4.5	88	1924	1861	1957	89	64.986	0.201248	100	1924	1	0	0
794	r1i1p1_inmcm4_RCP4.5_087.final.csv	[1861.0, 1924, 1957, 1978, 1993, 2006, 2024, 2034, 2047, 2059, 2069, 2076, 2100.0]	29	77	2	r1i1p1	inmcm4	RCP4.5	88	1957	1924	1978	89	27.4655	0.13538	100	1957	0.98	1959	0.02
795	r1i1p1_inmcm4_RCP4.5_087.final.csv	[1861.0, 1924, 1957, 1978, 1993, 2006, 2024, 2034, 2047, 2059, 2069, 2076, 2100.0]	29	77	2	r1i1p1	inmcm4	RCP4.5	88	1978	1957	1993	100	23.08	0.16424	100	1978	1	0	0
796	r1i1p1_inmcm4_RCP4.5_087.final.csv	[1861.0, 1924, 1957, 1978, 1993, 2006, 2024, 2034, 2047, 2059, 2069, 2076, 2100.0]	29	77	2	r1i1p1	inmcm4	RCP4.5	88	1993	1978	2006	99	18.488	0.143893	100	1993	0.94	1998	0.04
797	r1i1p1_inmcm4_RCP4.5_087.final.csv	[1861.0, 1924, 1957, 1978, 1993, 2006, 2024, 2034, 2047, 2059, 2069, 2076, 2100.0]	29	77	2	r1i1p1	inmcm4	RCP4.5	88	2006	1993	2024	99	20.4263	0.162438	99	2006	0.6	2003	0.4
798	r1i1p1_inmcm4_RCP4.5_087.final.csv	[1861.0, 1924, 1957, 1978, 1993, 2006, 2024, 2034, 2047, 2059, 2069, 2076, 2100.0]	29	77	2	r1i1p1	inmcm4	RCP4.5	88	2024	2006	2034	99	22.4102	0.231262	100	2024	0.99	2023	0.01
799	r1i1p1_inmcm4_RCP4.5_087.final.csv	[1861.0, 1924, 1957, 1978, 1993, 2006, 2024, 2034, 2047, 2059, 2069, 2076, 2100.0]	29	77	2	r1i1p1	inmcm4	RCP4.5	88	2034	2024	2047	100	17.8275	0.187579	100	2034	0.99	2033	0.01
800	r1i1p1_inmcm4_RCP4.5_087.final.csv	[1861.0, 1924, 1957, 1978, 1993, 2006, 2024, 2034, 2047, 2059, 2069, 2076, 2100.0]	29	77	2	r1i1p1	inmcm4	RCP4.5	88	2047	2034	2059	100	18.8135	0.17826	100	2047	0.91	2048	0.07
801	r1i1p1_inmcm4_RCP4.5_087.final.csv	[1861.0, 1924, 1957, 1978, 1993, 2006, 2024, 2034, 2047, 2059, 2069, 2076, 2100.0]	29	77	2	r1i1p1	inmcm4	RCP4.5	88	2059	2047	2069	100	14.9429	0.149242	100	2059	0.99	2058	0.01
802	r1i1p1_inmcm4_RCP4.5_087.final.csv	[1861.0, 1924, 1957, 1978, 1993, 2006, 2024, 2034, 2047, 2059, 2069, 2076, 2100.0]	29	77	2	r1i1p1	inmcm4	RCP4.5	88	2069	2059	2076	100	11.4569	0.135384	100	2069	0.99	2068	0.01
803	r1i1p1_inmcm4_RCP4.5_087.final.csv	[1861.0, 1924, 1957, 1978, 1993, 2006, 2024, 2034, 2047, 2059, 2069, 2076, 2100.0]	29	77	2	r1i1p1	inmcm4	RCP4.5	88	2076	2069	2100	100	17.1218	0.131918	100	2076	0.99	2075	0.01
804	r1i1p1_inmcm4_RCP4.5_087.final.csv	[1861.0, 1924, 1957, 1978, 1993, 2003, 2024, 2034, 2047, 2059, 2069, 2076, 2100.0]	29	78	3	r1i1p1	inmcm4	RCP4.5	1	1924	1861	1957	89	64.986	0.201248	100	1924	1	0	0
805	r1i1p1_inmcm4_RCP4.5_087.final.csv	[1861.0, 1924, 1957, 1978, 1993, 2003, 2024, 2034, 2047, 2059, 2069, 2076, 2100.0]	29	78	3	r1i1p1	inmcm4	RCP4.5	1	1957	1924	1978	89	27.4655	0.13538	100	1957	0.98	1959	0.02
806	r1i1p1_inmcm4_RCP4.5_087.final.csv	[1861.0, 1924, 1957, 1978, 1993, 2003, 2024, 2034, 2047, 2059, 2069, 2076, 2100.0]	29	78	3	r1i1p1	inmcm4	RCP4.5	1	1978	1957	1993	100	23.08	0.16424	100	1978	1	0	0
807	r1i1p1_inmcm4_RCP4.5_087.final.csv	[1861.0, 1924, 1957, 1978, 1993, 2003, 2024, 2034, 2047, 2059, 2069, 2076, 2100.0]	29	78	3	r1i1p1	inmcm4	RCP4.5	1	1993	1978	2003	1	16.5305	0.12141	100	1993	0.98	1995	0.01
808	r1i1p1_inmcm4_RCP4.5_087.final.csv	[1861.0, 1924, 1957, 1978, 1993, 2003, 2024, 2034, 2047, 2059, 2069, 2076, 2100.0]	29	78	3	r1i1p1	inmcm4	RCP4.5	1	2003	1993	2024	1	20.4263	0.162438	1	2006	0.6	2003	0.4
809	r1i1p1_inmcm4_RCP4.5_087.final.csv	[1861.0, 1924, 1957, 1978, 1993, 2003, 2024, 2034, 2047, 2059, 2069, 2076, 2100.0]	29	78	3	r1i1p1	inmcm4	RCP4.5	1	2024	2003	2034	1	24.1374	0.243725	100	2024	0.98	2020	0.01
810	r1i1p1_inmcm4_RCP4.5_087.final.csv	[1861.0, 1924, 1957, 1978, 1993, 2003, 2024, 2034, 2047, 2059, 2069, 2076, 2100.0]	29	78	3	r1i1p1	inmcm4	RCP4.5	1	2034	2024	2047	100	17.8275	0.187579	100	2034	0.99	2033	0.01
811	r1i1p1_inmcm4_RCP4.5_087.final.csv	[1861.0, 1924, 1957, 1978, 1993, 2003, 2024, 2034, 2047, 2059, 2069, 2076, 2100.0]	29	78	3	r1i1p1	inmcm4	RCP4.5	1	2047	2034	2059	100	18.8135	0.17826	100	2047	0.91	2048	0.07
812	r1i1p1_inmcm4_RCP4.5_087.final.csv	[1861.0, 1924, 1957, 1978, 1993, 2003, 2024, 2034, 2047, 2059, 2069, 2076, 2100.0]	29	78	3	r1i1p1	inmcm4	RCP4.5	1	2059	2047	2069	100	14.9429	0.149242	100	2059	0.99	2058	0.01
813	r1i1p1_inmcm4_RCP4.5_087.final.csv	[1861.0, 1924, 1957, 1978, 1993, 2003, 2024, 2034, 2047, 2059, 2069, 2076, 2100.0]	29	78	3	r1i1p1	inmcm4	RCP4.5	1	2069	2059	2076	100	11.4569	0.135384	100	2069	0.99	2068	0.01
814	r1i1p1_inmcm4_RCP4.5_087.final.csv	[1861.0, 1924, 1957, 1978, 1993, 2003, 2024, 2034, 2047, 2059, 2069, 2076, 2100.0]	29	78	3	r1i1p1	inmcm4	RCP4.5	1	2076	2069	2100	100	17.1218	0.131918	100	2076	0.99	2075	0.01
Seq	Source	BreakSet	DatasetNo	SetNo	SetNoInData	Type	Model	Treat	%BreakSet	Year	Predecessor	Successor	%SegmentFound	Ti	Shift	%YearOverall	ModalYear	ModalValue	SecondModalYear	SecondModalValue
815	r1i1p1_IPSL–CM5A–LR_RCP4.5_088.final.csv	[1861.0, 1921, 1972, 1986, 1997, 2017, 2030, 2046, 2061, 2090, 2100.0]	30	79	1	r1i1p1	IPSL–CM5A–LR	RCP4.5	1	1921	1861	1972	98	65.8249	0.351419	100	1921	0.92	1920	0.08
816	r1i1p1_IPSL–CM5A–LR_RCP4.5_088.final.csv	[1861.0, 1921, 1972, 1986, 1997, 2017, 2030, 2046, 2061, 2090, 2100.0]	30	79	1	r1i1p1	IPSL–CM5A–LR	RCP4.5	1	1972	1921	1986	98	12.9734	0.165538	98	1972	0.91	1941	0.03
817	r1i1p1_IPSL–CM5A–LR_RCP4.5_088.final.csv	[1861.0, 1921, 1972, 1986, 1997, 2017, 2030, 2046, 2061, 2090, 2100.0]	30	79	1	r1i1p1	IPSL–CM5A–LR	RCP4.5	1	1986	1972	1997	1	18.6465	0.3466	98	1986	0.99	1987	0.01
818	r1i1p1_IPSL–CM5A–LR_RCP4.5_088.final.csv	[1861.0, 1921, 1972, 1986, 1997, 2017, 2030, 2046, 2061, 2090, 2100.0]	30	79	1	r1i1p1	IPSL–CM5A–LR	RCP4.5	1	1997	1986	2017	1	24.6717	0.489535	1	1997	0.93	1996	0.07
819	r1i1p1_IPSL–CM5A–LR_RCP4.5_088.final.csv	[1861.0, 1921, 1972, 1986, 1997, 2017, 2030, 2046, 2061, 2090, 2100.0]	30	79	1	r1i1p1	IPSL–CM5A–LR	RCP4.5	1	2017	1997	2030	1	24.5302	0.411375	100	2017	1	0	0
820	r1i1p1_IPSL–CM5A–LR_RCP4.5_088.final.csv	[1861.0, 1921, 1972, 1986, 1997, 2017, 2030, 2046, 2061, 2090, 2100.0]	30	79	1	r1i1p1	IPSL–CM5A–LR	RCP4.5	1	2030	2017	2046	100	22.2397	0.469895	100	2030	0.88	2031	0.07
821	r1i1p1_IPSL–CM5A–LR_RCP4.5_088.final.csv	[1861.0, 1921, 1972, 1986, 1997, 2017, 2030, 2046, 2061, 2090, 2100.0]	30	79	1	r1i1p1	IPSL–CM5A–LR	RCP4.5	1	2046	2030	2061	100	25.0477	0.46655	100	2046	0.96	2043	0.04
822	r1i1p1_IPSL–CM5A–LR_RCP4.5_088.final.csv	[1861.0, 1921, 1972, 1986, 1997, 2017, 2030, 2046, 2061, 2090, 2100.0]	30	79	1	r1i1p1	IPSL–CM5A–LR	RCP4.5	1	2061	2046	2090	100	31.4875	0.322375	100	2061	0.66	2060	0.34
823	r1i1p1_IPSL–CM5A–LR_RCP4.5_088.final.csv	[1861.0, 1921, 1972, 1986, 1997, 2017, 2030, 2046, 2061, 2090, 2100.0]	30	79	1	r1i1p1	IPSL–CM5A–LR	RCP4.5	1	2090	2061	2100	100	18.0602	0.231388	100	2090	0.97	2089	0.02
824	r1i1p1_IPSL–CM5A–LR_RCP4.5_088.final.csv	[1861.0, 1921, 1985, 1996, 2009, 2017, 2030, 2046, 2061, 2090, 2100.0]	30	80	2	r1i1p1	IPSL–CM5A–LR	RCP4.5	2	1921	1861	1985	2	78.4624	0.383184	100	1921	1	0	0
825	r1i1p1_IPSL–CM5A–LR_RCP4.5_088.final.csv	[1861.0, 1921, 1985, 1996, 2009, 2017, 2030, 2046, 2061, 2090, 2100.0]	30	80	2	r1i1p1	IPSL–CM5A–LR	RCP4.5	2	1985	1921	1996	2	40.2227	0.441973	2	1985	0.96	1986	0.03
826	r1i1p1_IPSL–CM5A–LR_RCP4.5_088.final.csv	[1861.0, 1921, 1985, 1996, 2009, 2017, 2030, 2046, 2061, 2090, 2100.0]	30	80	2	r1i1p1	IPSL–CM5A–LR	RCP4.5	2	1996	1985	2009	2	19.8354	0.443799	99	1996	0.84	1997	0.16
827	r1i1p1_IPSL–CM5A–LR_RCP4.5_088.final.csv	[1861.0, 1921, 1985, 1996, 2009, 2017, 2030, 2046, 2061, 2090, 2100.0]	30	80	2	r1i1p1	IPSL–CM5A–LR	RCP4.5	2	2009	1996	2017	99	11.5084	0.191578	99	2009	0.59	2012	0.16
828	r1i1p1_IPSL–CM5A–LR_RCP4.5_088.final.csv	[1861.0, 1921, 1985, 1996, 2009, 2017, 2030, 2046, 2061, 2090, 2100.0]	30	80	2	r1i1p1	IPSL–CM5A–LR	RCP4.5	2	2017	2009	2030	99	13.377	0.3102	100	2017	0.82	2022	0.05
829	r1i1p1_IPSL–CM5A–LR_RCP4.5_088.final.csv	[1861.0, 1921, 1985, 1996, 2009, 2017, 2030, 2046, 2061, 2090, 2100.0]	30	80	2	r1i1p1	IPSL–CM5A–LR	RCP4.5	2	2030	2017	2046	100	22.2397	0.469895	100	2030	0.88	2031	0.07
830	r1i1p1_IPSL–CM5A–LR_RCP4.5_088.final.csv	[1861.0, 1921, 1985, 1996, 2009, 2017, 2030, 2046, 2061, 2090, 2100.0]	30	80	2	r1i1p1	IPSL–CM5A–LR	RCP4.5	2	2046	2030	2061	100	25.0477	0.46655	100	2046	0.96	2043	0.04
831	r1i1p1_IPSL–CM5A–LR_RCP4.5_088.final.csv	[1861.0, 1921, 1985, 1996, 2009, 2017, 2030, 2046, 2061, 2090, 2100.0]	30	80	2	r1i1p1	IPSL–CM5A–LR	RCP4.5	2	2061	2046	2090	100	31.4875	0.322375	100	2061	0.66	2060	0.34
832	r1i1p1_IPSL–CM5A–LR_RCP4.5_088.final.csv	[1861.0, 1921, 1985, 1996, 2009, 2017, 2030, 2046, 2061, 2090, 2100.0]	30	80	2	r1i1p1	IPSL–CM5A–LR	RCP4.5	2	2090	2061	2100	100	18.0602	0.231388	100	2090	0.97	2089	0.02
833	r1i1p1_IPSL–CM5A–LR_RCP4.5_088.final.csv	[1861.0, 1921, 1972, 1986, 1996, 2009, 2017, 2030, 2046, 2061, 2090, 2100.0]	30	81	3	r1i1p1	IPSL–CM5A–LR	RCP4.5	97	1921	1861	1972	98	65.8249	0.351419	100	1921	0.92	1920	0.08
834	r1i1p1_IPSL–CM5A–LR_RCP4.5_088.final.csv	[1861.0, 1921, 1972, 1986, 1996, 2009, 2017, 2030, 2046, 2061, 2090, 2100.0]	30	81	3	r1i1p1	IPSL–CM5A–LR	RCP4.5	97	1972	1921	1986	98	12.9734	0.165538	98	1972	0.91	1941	0.03
835	r1i1p1_IPSL–CM5A–LR_RCP4.5_088.final.csv	[1861.0, 1921, 1972, 1986, 1996, 2009, 2017, 2030, 2046, 2061, 2090, 2100.0]	30	81	3	r1i1p1	IPSL–CM5A–LR	RCP4.5	97	1986	1972	1996	97	18.2049	0.326459	98	1986	0.94	1985	0.06
836	r1i1p1_IPSL–CM5A–LR_RCP4.5_088.final.csv	[1861.0, 1921, 1972, 1986, 1996, 2009, 2017, 2030, 2046, 2061, 2090, 2100.0]	30	81	3	r1i1p1	IPSL–CM5A–LR	RCP4.5	97	1996	1986	2009	97	19.2106	0.424044	99	1996	0.65	1997	0.35
837	r1i1p1_IPSL–CM5A–LR_RCP4.5_088.final.csv	[1861.0, 1921, 1972, 1986, 1996, 2009, 2017, 2030, 2046, 2061, 2090, 2100.0]	30	81	3	r1i1p1	IPSL–CM5A–LR	RCP4.5	97	2009	1996	2017	99	11.5084	0.191578	99	2009	0.59	2012	0.16
838	r1i1p1_IPSL–CM5A–LR_RCP4.5_088.final.csv	[1861.0, 1921, 1972, 1986, 1996, 2009, 2017, 2030, 2046, 2061, 2090, 2100.0]	30	81	3	r1i1p1	IPSL–CM5A–LR	RCP4.5	97	2017	2009	2030	99	13.377	0.3102	100	2017	0.82	2022	0.05
839	r1i1p1_IPSL–CM5A–LR_RCP4.5_088.final.csv	[1861.0, 1921, 1972, 1986, 1996, 2009, 2017, 2030, 2046, 2061, 2090, 2100.0]	30	81	3	r1i1p1	IPSL–CM5A–LR	RCP4.5	97	2030	2017	2046	100	22.2397	0.469895	100	2030	0.88	2031	0.07
840	r1i1p1_IPSL–CM5A–LR_RCP4.5_088.final.csv	[1861.0, 1921, 1972, 1986, 1996, 2009, 2017, 2030, 2046, 2061, 2090, 2100.0]	30	81	3	r1i1p1	IPSL–CM5A–LR	RCP4.5	97	2046	2030	2061	100	25.0477	0.46655	100	2046	0.96	2043	0.04
841	r1i1p1_IPSL–CM5A–LR_RCP4.5_088.final.csv	[1861.0, 1921, 1972, 1986, 1996, 2009, 2017, 2030, 2046, 2061, 2090, 2100.0]	30	81	3	r1i1p1	IPSL–CM5A–LR	RCP4.5	97	2061	2046	2090	100	31.4875	0.322375	100	2061	0.66	2060	0.34
842	r1i1p1_IPSL–CM5A–LR_RCP4.5_088.final.csv	[1861.0, 1921, 1972, 1986, 1996, 2009, 2017, 2030, 2046, 2061, 2090, 2100.0]	30	81	3	r1i1p1	IPSL–CM5A–LR	RCP4.5	97	2090	2061	2100	100	18.0602	0.231388	100	2090	0.97	2089	0.02
Seq	Source	BreakSet	DatasetNo	SetNo	SetNoInData	Type	Model	Treat	%BreakSet	Year	Predecessor	Successor	%SegmentFound	Ti	Shift	%YearOverall	ModalYear	ModalValue	SecondModalYear	SecondModalValue
843	r1i1p1_IPSL–CM5A–MR_RCP4.5_092.final.csv	[1861.0, 1905, 1926, 1976, 1995, 2008, 2027, 2049, 2058, 2070, 2100.0]	31	82	1	r1i1p1	IPSL–CM5A–MR	RCP4.5	1	1905	1861	1926	100	19.0073	0.152943	100	1905	0.76	1913	0.1
844	r1i1p1_IPSL–CM5A–MR_RCP4.5_092.final.csv	[1861.0, 1905, 1926, 1976, 1995, 2008, 2027, 2049, 2058, 2070, 2100.0]	31	82	1	r1i1p1	IPSL–CM5A–MR	RCP4.5	1	1926	1905	1976	100	30.122	0.18531	100	1926	0.97	1927	0.03
845	r1i1p1_IPSL–CM5A–MR_RCP4.5_092.final.csv	[1861.0, 1905, 1926, 1976, 1995, 2008, 2027, 2049, 2058, 2070, 2100.0]	31	82	1	r1i1p1	IPSL–CM5A–MR	RCP4.5	1	1976	1926	1995	100	36.9689	0.269909	100	1976	0.98	1979	0.02
846	r1i1p1_IPSL–CM5A–MR_RCP4.5_092.final.csv	[1861.0, 1905, 1926, 1976, 1995, 2008, 2027, 2049, 2058, 2070, 2100.0]	31	82	1	r1i1p1	IPSL–CM5A–MR	RCP4.5	1	1995	1976	2008	100	24.4327	0.451484	100	1995	0.95	1994	0.05
847	r1i1p1_IPSL–CM5A–MR_RCP4.5_092.final.csv	[1861.0, 1905, 1926, 1976, 1995, 2008, 2027, 2049, 2058, 2070, 2100.0]	31	82	1	r1i1p1	IPSL–CM5A–MR	RCP4.5	1	2008	1995	2027	44	23.727	0.477861	100	2008	0.98	2007	0.01
848	r1i1p1_IPSL–CM5A–MR_RCP4.5_092.final.csv	[1861.0, 1905, 1926, 1976, 1995, 2008, 2027, 2049, 2058, 2070, 2100.0]	31	82	1	r1i1p1	IPSL–CM5A–MR	RCP4.5	1	2027	2008	2049	9	32.9257	0.577445	44	2027	0.93	2028	0.07
849	r1i1p1_IPSL–CM5A–MR_RCP4.5_092.final.csv	[1861.0, 1905, 1926, 1976, 1995, 2008, 2027, 2049, 2058, 2070, 2100.0]	31	82	1	r1i1p1	IPSL–CM5A–MR	RCP4.5	1	2049	2027	2058	1	20.4471	0.320705	9	2042	0.42	2046	0.29
850	r1i1p1_IPSL–CM5A–MR_RCP4.5_092.final.csv	[1861.0, 1905, 1926, 1976, 1995, 2008, 2027, 2049, 2058, 2070, 2100.0]	31	82	1	r1i1p1	IPSL–CM5A–MR	RCP4.5	1	2058	2049	2070	1	14.4402	0.296644	1	2057	0.93	2058	0.07
851	r1i1p1_IPSL–CM5A–MR_RCP4.5_092.final.csv	[1861.0, 1905, 1926, 1976, 1995, 2008, 2027, 2049, 2058, 2070, 2100.0]	31	82	1	r1i1p1	IPSL–CM5A–MR	RCP4.5	1	2070	2058	2100	1	27.8396	0.317292	1	2070	0.98	2067	0.01
852	r1i1p1_IPSL–CM5A–MR_RCP4.5_092.final.csv	[1861.0, 1905, 1926, 1976, 1995, 2008, 2022, 2042, 2056, 2067, 2075, 2100.0]	31	83	2	r1i1p1	IPSL–CM5A–MR	RCP4.5	56	1905	1861	1926	100	19.0073	0.152943	100	1905	0.76	1913	0.1
853	r1i1p1_IPSL–CM5A–MR_RCP4.5_092.final.csv	[1861.0, 1905, 1926, 1976, 1995, 2008, 2022, 2042, 2056, 2067, 2075, 2100.0]	31	83	2	r1i1p1	IPSL–CM5A–MR	RCP4.5	56	1926	1905	1976	100	30.122	0.18531	100	1926	0.97	1927	0.03
854	r1i1p1_IPSL–CM5A–MR_RCP4.5_092.final.csv	[1861.0, 1905, 1926, 1976, 1995, 2008, 2022, 2042, 2056, 2067, 2075, 2100.0]	31	83	2	r1i1p1	IPSL–CM5A–MR	RCP4.5	56	1976	1926	1995	100	36.9689	0.269909	100	1976	0.98	1979	0.02
855	r1i1p1_IPSL–CM5A–MR_RCP4.5_092.final.csv	[1861.0, 1905, 1926, 1976, 1995, 2008, 2022, 2042, 2056, 2067, 2075, 2100.0]	31	83	2	r1i1p1	IPSL–CM5A–MR	RCP4.5	56	1995	1976	2008	100	24.4327	0.451484	100	1995	0.95	1994	0.05
856	r1i1p1_IPSL–CM5A–MR_RCP4.5_092.final.csv	[1861.0, 1905, 1926, 1976, 1995, 2008, 2022, 2042, 2056, 2067, 2075, 2100.0]	31	83	2	r1i1p1	IPSL–CM5A–MR	RCP4.5	56	2008	1995	2022	56	21.8744	0.398942	100	2008	0.94	2007	0.06
857	r1i1p1_IPSL–CM5A–MR_RCP4.5_092.final.csv	[1861.0, 1905, 1926, 1976, 1995, 2008, 2022, 2042, 2056, 2067, 2075, 2100.0]	31	83	2	r1i1p1	IPSL–CM5A–MR	RCP4.5	56	2022	2008	2042	56	27.0296	0.513593	56	2027	0.46	2022	0.45
858	r1i1p1_IPSL–CM5A–MR_RCP4.5_092.final.csv	[1861.0, 1905, 1926, 1976, 1995, 2008, 2022, 2042, 2056, 2067, 2075, 2100.0]	31	83	2	r1i1p1	IPSL–CM5A–MR	RCP4.5	56	2042	2022	2056	56	20.9034	0.364159	81	2042	0.92	2041	0.03
859	r1i1p1_IPSL–CM5A–MR_RCP4.5_092.final.csv	[1861.0, 1905, 1926, 1976, 1995, 2008, 2022, 2042, 2056, 2067, 2075, 2100.0]	31	83	2	r1i1p1	IPSL–CM5A–MR	RCP4.5	56	2056	2042	2067	69	17.468	0.348239	69	2056	0.53	2057	0.47
860	r1i1p1_IPSL–CM5A–MR_RCP4.5_092.final.csv	[1861.0, 1905, 1926, 1976, 1995, 2008, 2022, 2042, 2056, 2067, 2075, 2100.0]	31	83	2	r1i1p1	IPSL–CM5A–MR	RCP4.5	56	2067	2056	2075	69	10.4796	0.223138	99	2067	0.9	2064	0.07
861	r1i1p1_IPSL–CM5A–MR_RCP4.5_092.final.csv	[1861.0, 1905, 1926, 1976, 1995, 2008, 2022, 2042, 2056, 2067, 2075, 2100.0]	31	83	2	r1i1p1	IPSL–CM5A–MR	RCP4.5	56	2075	2067	2100	99	15.4806	0.183115	99	2075	0.98	2078	0.02
862	r1i1p1_IPSL–CM5A–MR_RCP4.5_092.final.csv	[1861.0, 1905, 1926, 1976, 1995, 2008, 2027, 2046, 2057, 2067, 2075, 2100.0]	31	84	3	r1i1p1	IPSL–CM5A–MR	RCP4.5	10	1905	1861	1926	100	19.0073	0.152943	100	1905	0.76	1913	0.1
863	r1i1p1_IPSL–CM5A–MR_RCP4.5_092.final.csv	[1861.0, 1905, 1926, 1976, 1995, 2008, 2027, 2046, 2057, 2067, 2075, 2100.0]	31	84	3	r1i1p1	IPSL–CM5A–MR	RCP4.5	10	1926	1905	1976	100	30.122	0.18531	100	1926	0.97	1927	0.03
864	r1i1p1_IPSL–CM5A–MR_RCP4.5_092.final.csv	[1861.0, 1905, 1926, 1976, 1995, 2008, 2027, 2046, 2057, 2067, 2075, 2100.0]	31	84	3	r1i1p1	IPSL–CM5A–MR	RCP4.5	10	1976	1926	1995	100	36.9689	0.269909	100	1976	0.98	1979	0.02
865	r1i1p1_IPSL–CM5A–MR_RCP4.5_092.final.csv	[1861.0, 1905, 1926, 1976, 1995, 2008, 2027, 2046, 2057, 2067, 2075, 2100.0]	31	84	3	r1i1p1	IPSL–CM5A–MR	RCP4.5	10	1995	1976	2008	100	24.4327	0.451484	100	1995	0.95	1994	0.05
866	r1i1p1_IPSL–CM5A–MR_RCP4.5_092.final.csv	[1861.0, 1905, 1926, 1976, 1995, 2008, 2027, 2046, 2057, 2067, 2075, 2100.0]	31	84	3	r1i1p1	IPSL–CM5A–MR	RCP4.5	10	2008	1995	2027	44	23.727	0.477861	100	2008	0.98	2007	0.01
867	r1i1p1_IPSL–CM5A–MR_RCP4.5_092.final.csv	[1861.0, 1905, 1926, 1976, 1995, 2008, 2027, 2046, 2057, 2067, 2075, 2100.0]	31	84	3	r1i1p1	IPSL–CM5A–MR	RCP4.5	10	2027	2008	2046	10	30.3515	0.549996	44	2027	0.93	2028	0.04
868	r1i1p1_IPSL–CM5A–MR_RCP4.5_092.final.csv	[1861.0, 1905, 1926, 1976, 1995, 2008, 2027, 2046, 2057, 2067, 2075, 2100.0]	31	84	3	r1i1p1	IPSL–CM5A–MR	RCP4.5	10	2046	2027	2057	10	19.6126	0.301889	10	2042	0.85	2046	0.1
869	r1i1p1_IPSL–CM5A–MR_RCP4.5_092.final.csv	[1861.0, 1905, 1926, 1976, 1995, 2008, 2027, 2046, 2057, 2067, 2075, 2100.0]	31	84	3	r1i1p1	IPSL–CM5A–MR	RCP4.5	10	2057	2046	2067	10	14.6118	0.306484	30	2057	0.81	2056	0.18
870	r1i1p1_IPSL–CM5A–MR_RCP4.5_092.final.csv	[1861.0, 1905, 1926, 1976, 1995, 2008, 2027, 2046, 2057, 2067, 2075, 2100.0]	31	84	3	r1i1p1	IPSL–CM5A–MR	RCP4.5	10	2067	2057	2075	30	9.90581	0.203752	99	2067	0.94	2064	0.02
871	r1i1p1_IPSL–CM5A–MR_RCP4.5_092.final.csv	[1861.0, 1905, 1926, 1976, 1995, 2008, 2027, 2046, 2057, 2067, 2075, 2100.0]	31	84	3	r1i1p1	IPSL–CM5A–MR	RCP4.5	10	2075	2067	2100	99	15.4806	0.183115	99	2075	0.98	2078	0.02
872	r1i1p1_IPSL–CM5A–MR_RCP4.5_092.final.csv	[1861.0, 1905, 1926, 1976, 1995, 2008, 2027, 2042, 2056, 2067, 2075, 2100.0]	31	85	4	r1i1p1	IPSL–CM5A–MR	RCP4.5	13	1905	1861	1926	100	19.0073	0.152943	100	1905	0.76	1913	0.1
873	r1i1p1_IPSL–CM5A–MR_RCP4.5_092.final.csv	[1861.0, 1905, 1926, 1976, 1995, 2008, 2027, 2042, 2056, 2067, 2075, 2100.0]	31	85	4	r1i1p1	IPSL–CM5A–MR	RCP4.5	13	1926	1905	1976	100	30.122	0.18531	100	1926	0.97	1927	0.03
874	r1i1p1_IPSL–CM5A–MR_RCP4.5_092.final.csv	[1861.0, 1905, 1926, 1976, 1995, 2008, 2027, 2042, 2056, 2067, 2075, 2100.0]	31	85	4	r1i1p1	IPSL–CM5A–MR	RCP4.5	13	1976	1926	1995	100	36.9689	0.269909	100	1976	0.98	1979	0.02
875	r1i1p1_IPSL–CM5A–MR_RCP4.5_092.final.csv	[1861.0, 1905, 1926, 1976, 1995, 2008, 2027, 2042, 2056, 2067, 2075, 2100.0]	31	85	4	r1i1p1	IPSL–CM5A–MR	RCP4.5	13	1995	1976	2008	100	24.4327	0.451484	100	1995	0.95	1994	0.05
876	r1i1p1_IPSL–CM5A–MR_RCP4.5_092.final.csv	[1861.0, 1905, 1926, 1976, 1995, 2008, 2027, 2042, 2056, 2067, 2075, 2100.0]	31	85	4	r1i1p1	IPSL–CM5A–MR	RCP4.5	13	2008	1995	2027	44	23.727	0.477861	100	2008	0.98	2007	0.01
877	r1i1p1_IPSL–CM5A–MR_RCP4.5_092.final.csv	[1861.0, 1905, 1926, 1976, 1995, 2008, 2027, 2042, 2056, 2067, 2075, 2100.0]	31	85	4	r1i1p1	IPSL–CM5A–MR	RCP4.5	13	2027	2008	2042	25	27.0296	0.513593	44	2027	0.46	2022	0.45
878	r1i1p1_IPSL–CM5A–MR_RCP4.5_092.final.csv	[1861.0, 1905, 1926, 1976, 1995, 2008, 2027, 2042, 2056, 2067, 2075, 2100.0]	31	85	4	r1i1p1	IPSL–CM5A–MR	RCP4.5	13	2042	2027	2056	13	18.7927	0.289203	81	2042	0.96	2046	0.04
879	r1i1p1_IPSL–CM5A–MR_RCP4.5_092.final.csv	[1861.0, 1905, 1926, 1976, 1995, 2008, 2027, 2042, 2056, 2067, 2075, 2100.0]	31	85	4	r1i1p1	IPSL–CM5A–MR	RCP4.5	13	2056	2042	2067	69	17.468	0.348239	69	2056	0.53	2057	0.47
880	r1i1p1_IPSL–CM5A–MR_RCP4.5_092.final.csv	[1861.0, 1905, 1926, 1976, 1995, 2008, 2027, 2042, 2056, 2067, 2075, 2100.0]	31	85	4	r1i1p1	IPSL–CM5A–MR	RCP4.5	13	2067	2056	2075	69	10.4796	0.223138	99	2067	0.9	2064	0.07
881	r1i1p1_IPSL–CM5A–MR_RCP4.5_092.final.csv	[1861.0, 1905, 1926, 1976, 1995, 2008, 2027, 2042, 2056, 2067, 2075, 2100.0]	31	85	4	r1i1p1	IPSL–CM5A–MR	RCP4.5	13	2075	2067	2100	99	15.4806	0.183115	99	2075	0.98	2078	0.02
882	r1i1p1_IPSL–CM5A–MR_RCP4.5_092.final.csv	[1861.0, 1905, 1926, 1976, 1995, 2008, 2027, 2042, 2057, 2067, 2075, 2100.0]	31	86	5	r1i1p1	IPSL–CM5A–MR	RCP4.5	12	1905	1861	1926	100	19.0073	0.152943	100	1905	0.76	1913	0.1
883	r1i1p1_IPSL–CM5A–MR_RCP4.5_092.final.csv	[1861.0, 1905, 1926, 1976, 1995, 2008, 2027, 2042, 2057, 2067, 2075, 2100.0]	31	86	5	r1i1p1	IPSL–CM5A–MR	RCP4.5	12	1926	1905	1976	100	30.122	0.18531	100	1926	0.97	1927	0.03
884	r1i1p1_IPSL–CM5A–MR_RCP4.5_092.final.csv	[1861.0, 1905, 1926, 1976, 1995, 2008, 2027, 2042, 2057, 2067, 2075, 2100.0]	31	86	5	r1i1p1	IPSL–CM5A–MR	RCP4.5	12	1976	1926	1995	100	36.9689	0.269909	100	1976	0.98	1979	0.02
885	r1i1p1_IPSL–CM5A–MR_RCP4.5_092.final.csv	[1861.0, 1905, 1926, 1976, 1995, 2008, 2027, 2042, 2057, 2067, 2075, 2100.0]	31	86	5	r1i1p1	IPSL–CM5A–MR	RCP4.5	12	1995	1976	2008	100	24.4327	0.451484	100	1995	0.95	1994	0.05
886	r1i1p1_IPSL–CM5A–MR_RCP4.5_092.final.csv	[1861.0, 1905, 1926, 1976, 1995, 2008, 2027, 2042, 2057, 2067, 2075, 2100.0]	31	86	5	r1i1p1	IPSL–CM5A–MR	RCP4.5	12	2008	1995	2027	44	23.727	0.477861	100	2008	0.98	2007	0.01
887	r1i1p1_IPSL–CM5A–MR_RCP4.5_092.final.csv	[1861.0, 1905, 1926, 1976, 1995, 2008, 2027, 2042, 2057, 2067, 2075, 2100.0]	31	86	5	r1i1p1	IPSL–CM5A–MR	RCP4.5	12	2027	2008	2042	25	27.0296	0.513593	44	2027	0.46	2022	0.45
888	r1i1p1_IPSL–CM5A–MR_RCP4.5_092.final.csv	[1861.0, 1905, 1926, 1976, 1995, 2008, 2027, 2042, 2057, 2067, 2075, 2100.0]	31	86	5	r1i1p1	IPSL–CM5A–MR	RCP4.5	12	2042	2027	2057	12	19.6126	0.301889	81	2042	0.85	2046	0.1
889	r1i1p1_IPSL–CM5A–MR_RCP4.5_092.final.csv	[1861.0, 1905, 1926, 1976, 1995, 2008, 2027, 2042, 2057, 2067, 2075, 2100.0]	31	86	5	r1i1p1	IPSL–CM5A–MR	RCP4.5	12	2057	2042	2067	12	17.468	0.348239	30	2056	0.53	2057	0.47
890	r1i1p1_IPSL–CM5A–MR_RCP4.5_092.final.csv	[1861.0, 1905, 1926, 1976, 1995, 2008, 2027, 2042, 2057, 2067, 2075, 2100.0]	31	86	5	r1i1p1	IPSL–CM5A–MR	RCP4.5	12	2067	2057	2075	30	9.90581	0.203752	99	2067	0.94	2064	0.02
891	r1i1p1_IPSL–CM5A–MR_RCP4.5_092.final.csv	[1861.0, 1905, 1926, 1976, 1995, 2008, 2027, 2042, 2057, 2067, 2075, 2100.0]	31	86	5	r1i1p1	IPSL–CM5A–MR	RCP4.5	12	2075	2067	2100	99	15.4806	0.183115	99	2075	0.98	2078	0.02
892	r1i1p1_IPSL–CM5A–MR_RCP4.5_092.final.csv	[1861.0, 1905, 1926, 1976, 1995, 2008, 2027, 2049, 2057, 2067, 2075, 2100.0]	31	87	6	r1i1p1	IPSL–CM5A–MR	RCP4.5	8	1905	1861	1926	100	19.0073	0.152943	100	1905	0.76	1913	0.1
893	r1i1p1_IPSL–CM5A–MR_RCP4.5_092.final.csv	[1861.0, 1905, 1926, 1976, 1995, 2008, 2027, 2049, 2057, 2067, 2075, 2100.0]	31	87	6	r1i1p1	IPSL–CM5A–MR	RCP4.5	8	1926	1905	1976	100	30.122	0.18531	100	1926	0.97	1927	0.03
894	r1i1p1_IPSL–CM5A–MR_RCP4.5_092.final.csv	[1861.0, 1905, 1926, 1976, 1995, 2008, 2027, 2049, 2057, 2067, 2075, 2100.0]	31	87	6	r1i1p1	IPSL–CM5A–MR	RCP4.5	8	1976	1926	1995	100	36.9689	0.269909	100	1976	0.98	1979	0.02
895	r1i1p1_IPSL–CM5A–MR_RCP4.5_092.final.csv	[1861.0, 1905, 1926, 1976, 1995, 2008, 2027, 2049, 2057, 2067, 2075, 2100.0]	31	87	6	r1i1p1	IPSL–CM5A–MR	RCP4.5	8	1995	1976	2008	100	24.4327	0.451484	100	1995	0.95	1994	0.05
896	r1i1p1_IPSL–CM5A–MR_RCP4.5_092.final.csv	[1861.0, 1905, 1926, 1976, 1995, 2008, 2027, 2049, 2057, 2067, 2075, 2100.0]	31	87	6	r1i1p1	IPSL–CM5A–MR	RCP4.5	8	2008	1995	2027	44	23.727	0.477861	100	2008	0.98	2007	0.01
897	r1i1p1_IPSL–CM5A–MR_RCP4.5_092.final.csv	[1861.0, 1905, 1926, 1976, 1995, 2008, 2027, 2049, 2057, 2067, 2075, 2100.0]	31	87	6	r1i1p1	IPSL–CM5A–MR	RCP4.5	8	2027	2008	2049	9	32.9257	0.577445	44	2027	0.93	2028	0.07
898	r1i1p1_IPSL–CM5A–MR_RCP4.5_092.final.csv	[1861.0, 1905, 1926, 1976, 1995, 2008, 2027, 2049, 2057, 2067, 2075, 2100.0]	31	87	6	r1i1p1	IPSL–CM5A–MR	RCP4.5	8	2049	2027	2057	8	19.6126	0.301889	9	2042	0.85	2046	0.1
899	r1i1p1_IPSL–CM5A–MR_RCP4.5_092.final.csv	[1861.0, 1905, 1926, 1976, 1995, 2008, 2027, 2049, 2057, 2067, 2075, 2100.0]	31	87	6	r1i1p1	IPSL–CM5A–MR	RCP4.5	8	2057	2049	2067	8	12.2176	0.260806	30	2057	0.97	2058	0.02
900	r1i1p1_IPSL–CM5A–MR_RCP4.5_092.final.csv	[1861.0, 1905, 1926, 1976, 1995, 2008, 2027, 2049, 2057, 2067, 2075, 2100.0]	31	87	6	r1i1p1	IPSL–CM5A–MR	RCP4.5	8	2067	2057	2075	30	9.90581	0.203752	99	2067	0.94	2064	0.02
901	r1i1p1_IPSL–CM5A–MR_RCP4.5_092.final.csv	[1861.0, 1905, 1926, 1976, 1995, 2008, 2027, 2049, 2057, 2067, 2075, 2100.0]	31	87	6	r1i1p1	IPSL–CM5A–MR	RCP4.5	8	2075	2067	2100	99	15.4806	0.183115	99	2075	0.98	2078	0.02
Seq	Source	BreakSet	DatasetNo	SetNo	SetNoInData	Type	Model	Treat	%BreakSet	Year	Predecessor	Successor	%SegmentFound	Ti	Shift	%YearOverall	ModalYear	ModalValue	SecondModalYear	SecondModalValue
902	r1i1p1_IPSL–CM5B–LR_RCP4.5_093.final.csv	[1861.0, 1883, 1904, 1936, 1961, 1970, 1996, 2011, 2026, 2035, 2055, 2075, 2100.0]	32	88	1	r1i1p1	IPSL–CM5B–LR	RCP4.5	100	1883	1861	1904	100	13.3149	–0.136504948743	100	1883	1	0	0
903	r1i1p1_IPSL–CM5B–LR_RCP4.5_093.final.csv	[1861.0, 1883, 1904, 1936, 1961, 1970, 1996, 2011, 2026, 2035, 2055, 2075, 2100.0]	32	88	1	r1i1p1	IPSL–CM5B–LR	RCP4.5	100	1904	1883	1936	100	37.8725	0.360659	100	1904	1	0	0
904	r1i1p1_IPSL–CM5B–LR_RCP4.5_093.final.csv	[1861.0, 1883, 1904, 1936, 1961, 1970, 1996, 2011, 2026, 2035, 2055, 2075, 2100.0]	32	88	1	r1i1p1	IPSL–CM5B–LR	RCP4.5	100	1936	1904	1961	100	29.3125	0.186117	100	1936	1	0	0
905	r1i1p1_IPSL–CM5B–LR_RCP4.5_093.final.csv	[1861.0, 1883, 1904, 1936, 1961, 1970, 1996, 2011, 2026, 2035, 2055, 2075, 2100.0]	32	88	1	r1i1p1	IPSL–CM5B–LR	RCP4.5	100	1961	1936	1970	100	11.8449	–0.146292500438	100	1961	0.85	1962	0.15
906	r1i1p1_IPSL–CM5B–LR_RCP4.5_093.final.csv	[1861.0, 1883, 1904, 1936, 1961, 1970, 1996, 2011, 2026, 2035, 2055, 2075, 2100.0]	32	88	1	r1i1p1	IPSL–CM5B–LR	RCP4.5	100	1970	1961	1996	100	21.9561	0.397099	100	1970	0.95	1968	0.04
907	r1i1p1_IPSL–CM5B–LR_RCP4.5_093.final.csv	[1861.0, 1883, 1904, 1936, 1961, 1970, 1996, 2011, 2026, 2035, 2055, 2075, 2100.0]	32	88	1	r1i1p1	IPSL–CM5B–LR	RCP4.5	100	1996	1970	2011	100	25.0086	0.316631	100	1996	0.97	1995	0.02
908	r1i1p1_IPSL–CM5B–LR_RCP4.5_093.final.csv	[1861.0, 1883, 1904, 1936, 1961, 1970, 1996, 2011, 2026, 2035, 2055, 2075, 2100.0]	32	88	1	r1i1p1	IPSL–CM5B–LR	RCP4.5	100	2011	1996	2026	100	19.9356	0.261678	100	2011	1	0	0
909	r1i1p1_IPSL–CM5B–LR_RCP4.5_093.final.csv	[1861.0, 1883, 1904, 1936, 1961, 1970, 1996, 2011, 2026, 2035, 2055, 2075, 2100.0]	32	88	1	r1i1p1	IPSL–CM5B–LR	RCP4.5	100	2026	2011	2035	100	18.0652	0.325511	100	2026	0.75	2024	0.15
910	r1i1p1_IPSL–CM5B–LR_RCP4.5_093.final.csv	[1861.0, 1883, 1904, 1936, 1961, 1970, 1996, 2011, 2026, 2035, 2055, 2075, 2100.0]	32	88	1	r1i1p1	IPSL–CM5B–LR	RCP4.5	100	2035	2026	2055	100	18.7101	0.297812	100	2035	0.81	2039	0.11
911	r1i1p1_IPSL–CM5B–LR_RCP4.5_093.final.csv	[1861.0, 1883, 1904, 1936, 1961, 1970, 1996, 2011, 2026, 2035, 2055, 2075, 2100.0]	32	88	1	r1i1p1	IPSL–CM5B–LR	RCP4.5	100	2055	2035	2075	100	30.7194	0.402842	100	2055	1	0	0
912	r1i1p1_IPSL–CM5B–LR_RCP4.5_093.final.csv	[1861.0, 1883, 1904, 1936, 1961, 1970, 1996, 2011, 2026, 2035, 2055, 2075, 2100.0]	32	88	1	r1i1p1	IPSL–CM5B–LR	RCP4.5	100	2075	2055	2100	100	20.6841	0.179058	100	2075	0.93	2069	0.06
Seq	Source	BreakSet	DatasetNo	SetNo	SetNoInData	Type	Model	Treat	%BreakSet	Year	Predecessor	Successor	%SegmentFound	Ti	Shift	%YearOverall	ModalYear	ModalValue	SecondModalYear	SecondModalValue
913	r1i1p1_MIROC5_RCP4.5_094.final.csv	[1861.0, 1920, 1996, 2019, 2036, 2064, 2100.0]	33	89	1	r1i1p1	MIROC5	RCP4.5	100	1920	1861	1996	100	37.9858	0.201753	100	1920	1	0	0
914	r1i1p1_MIROC5_RCP4.5_094.final.csv	[1861.0, 1920, 1996, 2019, 2036, 2064, 2100.0]	33	89	1	r1i1p1	MIROC5	RCP4.5	100	1996	1920	2019	100	65.054	0.597719	100	1996	1	0	0
915	r1i1p1_MIROC5_RCP4.5_094.final.csv	[1861.0, 1920, 1996, 2019, 2036, 2064, 2100.0]	33	89	1	r1i1p1	MIROC5	RCP4.5	100	2019	1996	2036	100	20.7026	0.418638	100	2019	0.98	2014	0.01
916	r1i1p1_MIROC5_RCP4.5_094.final.csv	[1861.0, 1920, 1996, 2019, 2036, 2064, 2100.0]	33	89	1	r1i1p1	MIROC5	RCP4.5	100	2036	2019	2064	100	22.595	0.476109	100	2036	0.77	2041	0.23
917	r1i1p1_MIROC5_RCP4.5_094.final.csv	[1861.0, 1920, 1996, 2019, 2036, 2064, 2100.0]	33	89	1	r1i1p1	MIROC5	RCP4.5	100	2064	2036	2100	100	32.5716	0.429896	100	2064	0.88	2063	0.09
Seq	Source	BreakSet	DatasetNo	SetNo	SetNoInData	Type	Model	Treat	%BreakSet	Year	Predecessor	Successor	%SegmentFound	Ti	Shift	%YearOverall	ModalYear	ModalValue	SecondModalYear	SecondModalValue
918	r1i1p1_MIROC–ESM_RCP4.5_097.final.csv	[1861.0, 1921, 1942, 1963, 1975, 1995, 2009, 2020, 2033, 2045, 2057, 2070, 2100.0]	34	90	1	r1i1p1	MIROC–ESM	RCP4.5	100	1921	1861	1942	100	46.5813	0.281504	100	1921	0.96	1920	0.04
919	r1i1p1_MIROC–ESM_RCP4.5_097.final.csv	[1861.0, 1921, 1942, 1963, 1975, 1995, 2009, 2020, 2033, 2045, 2057, 2070, 2100.0]	34	90	1	r1i1p1	MIROC–ESM	RCP4.5	100	1942	1921	1963	100	19.1645	0.1566	100	1942	0.99	1943	0.01
920	r1i1p1_MIROC–ESM_RCP4.5_097.final.csv	[1861.0, 1921, 1942, 1963, 1975, 1995, 2009, 2020, 2033, 2045, 2057, 2070, 2100.0]	34	90	1	r1i1p1	MIROC–ESM	RCP4.5	100	1963	1942	1975	100	21.6679	–0.240189549822	100	1963	1	0	0
921	r1i1p1_MIROC–ESM_RCP4.5_097.final.csv	[1861.0, 1921, 1942, 1963, 1975, 1995, 2009, 2020, 2033, 2045, 2057, 2070, 2100.0]	34	90	1	r1i1p1	MIROC–ESM	RCP4.5	100	1975	1963	1995	100	21.5506	0.337359	100	1975	0.97	1973	0.01
922	r1i1p1_MIROC–ESM_RCP4.5_097.final.csv	[1861.0, 1921, 1942, 1963, 1975, 1995, 2009, 2020, 2033, 2045, 2057, 2070, 2100.0]	34	90	1	r1i1p1	MIROC–ESM	RCP4.5	100	1995	1975	2009	100	23.5223	0.350064	100	1995	0.99	1996	0.01
923	r1i1p1_MIROC–ESM_RCP4.5_097.final.csv	[1861.0, 1921, 1942, 1963, 1975, 1995, 2009, 2020, 2033, 2045, 2057, 2070, 2100.0]	34	90	1	r1i1p1	MIROC–ESM	RCP4.5	100	2009	1995	2020	100	19.3091	0.390267	100	2009	0.76	2010	0.23
924	r1i1p1_MIROC–ESM_RCP4.5_097.final.csv	[1861.0, 1921, 1942, 1963, 1975, 1995, 2009, 2020, 2033, 2045, 2057, 2070, 2100.0]	34	90	1	r1i1p1	MIROC–ESM	RCP4.5	100	2020	2009	2033	100	18.4356	0.492645	100	2020	0.97	2021	0.02
925	r1i1p1_MIROC–ESM_RCP4.5_097.final.csv	[1861.0, 1921, 1942, 1963, 1975, 1995, 2009, 2020, 2033, 2045, 2057, 2070, 2100.0]	34	90	1	r1i1p1	MIROC–ESM	RCP4.5	100	2033	2020	2045	100	19.0036	0.434066	100	2033	0.65	2031	0.24
926	r1i1p1_MIROC–ESM_RCP4.5_097.final.csv	[1861.0, 1921, 1942, 1963, 1975, 1995, 2009, 2020, 2033, 2045, 2057, 2070, 2100.0]	34	90	1	r1i1p1	MIROC–ESM	RCP4.5	100	2045	2033	2057	100	17.8771	0.271523	100	2045	0.97	2043	0.02
927	r1i1p1_MIROC–ESM_RCP4.5_097.final.csv	[1861.0, 1921, 1942, 1963, 1975, 1995, 2009, 2020, 2033, 2045, 2057, 2070, 2100.0]	34	90	1	r1i1p1	MIROC–ESM	RCP4.5	100	2057	2045	2070	100	19.0344	0.411499	100	2057	0.6	2061	0.36
928	r1i1p1_MIROC–ESM_RCP4.5_097.final.csv	[1861.0, 1921, 1942, 1963, 1975, 1995, 2009, 2020, 2033, 2045, 2057, 2070, 2100.0]	34	90	1	r1i1p1	MIROC–ESM	RCP4.5	100	2070	2057	2100	100	27.199	0.28655	100	2070	0.85	2071	0.15
Seq	Source	BreakSet	DatasetNo	SetNo	SetNoInData	Type	Model	Treat	%BreakSet	Year	Predecessor	Successor	%SegmentFound	Ti	Shift	%YearOverall	ModalYear	ModalValue	SecondModalYear	SecondModalValue
929	r1i1p1_MIROC–ESM–CHEM_RCP4.5_098.final.csv	[1861.0, 1917, 1975, 1995, 2007, 2023, 2040, 2048, 2055, 2071, 2081, 2100.0]	35	91	1	r1i1p1	MIROC–ESM–CHEM	RCP4.5	99	1917	1861	1975	100	73.1425	0.284715	100	1917	0.8	1916	0.19
930	r1i1p1_MIROC–ESM–CHEM_RCP4.5_098.final.csv	[1861.0, 1917, 1975, 1995, 2007, 2023, 2040, 2048, 2055, 2071, 2081, 2100.0]	35	91	1	r1i1p1	MIROC–ESM–CHEM	RCP4.5	99	1975	1917	1995	100	38.9506	0.227283	100	1975	0.74	1976	0.25
931	r1i1p1_MIROC–ESM–CHEM_RCP4.5_098.final.csv	[1861.0, 1917, 1975, 1995, 2007, 2023, 2040, 2048, 2055, 2071, 2081, 2100.0]	35	91	1	r1i1p1	MIROC–ESM–CHEM	RCP4.5	99	1995	1975	2007	100	17.028	0.280661	100	1995	0.95	1994	0.04
932	r1i1p1_MIROC–ESM–CHEM_RCP4.5_098.final.csv	[1861.0, 1917, 1975, 1995, 2007, 2023, 2040, 2048, 2055, 2071, 2081, 2100.0]	35	91	1	r1i1p1	MIROC–ESM–CHEM	RCP4.5	99	2007	1995	2023	100	21.8685	0.455888	100	2007	0.94	2006	0.06
933	r1i1p1_MIROC–ESM–CHEM_RCP4.5_098.final.csv	[1861.0, 1917, 1975, 1995, 2007, 2023, 2040, 2048, 2055, 2071, 2081, 2100.0]	35	91	1	r1i1p1	MIROC–ESM–CHEM	RCP4.5	99	2023	2007	2040	99	28.2552	0.640649	100	2023	1	0	0
934	r1i1p1_MIROC–ESM–CHEM_RCP4.5_098.final.csv	[1861.0, 1917, 1975, 1995, 2007, 2023, 2040, 2048, 2055, 2071, 2081, 2100.0]	35	91	1	r1i1p1	MIROC–ESM–CHEM	RCP4.5	99	2040	2023	2048	99	17.0264	0.37731	99	2040	0.68	2037	0.24
935	r1i1p1_MIROC–ESM–CHEM_RCP4.5_098.final.csv	[1861.0, 1917, 1975, 1995, 2007, 2023, 2040, 2048, 2055, 2071, 2081, 2100.0]	35	91	1	r1i1p1	MIROC–ESM–CHEM	RCP4.5	99	2048	2040	2055	99	11.3088	0.294937	99	2048	0.63	2047	0.36
936	r1i1p1_MIROC–ESM–CHEM_RCP4.5_098.final.csv	[1861.0, 1917, 1975, 1995, 2007, 2023, 2040, 2048, 2055, 2071, 2081, 2100.0]	35	91	1	r1i1p1	MIROC–ESM–CHEM	RCP4.5	99	2055	2048	2071	99	16.0846	0.283119	100	2055	0.9	2056	0.05
937	r1i1p1_MIROC–ESM–CHEM_RCP4.5_098.final.csv	[1861.0, 1917, 1975, 1995, 2007, 2023, 2040, 2048, 2055, 2071, 2081, 2100.0]	35	91	1	r1i1p1	MIROC–ESM–CHEM	RCP4.5	99	2071	2055	2081	100	17.8482	0.25655	100	2071	1	0	0
938	r1i1p1_MIROC–ESM–CHEM_RCP4.5_098.final.csv	[1861.0, 1917, 1975, 1995, 2007, 2023, 2040, 2048, 2055, 2071, 2081, 2100.0]	35	91	1	r1i1p1	MIROC–ESM–CHEM	RCP4.5	99	2081	2071	2100	100	13.3261	0.138634	100	2081	0.99	2077	0.01
939	r1i1p1_MIROC–ESM–CHEM_RCP4.5_098.final.csv	[1861.0, 1917, 1975, 1995, 2007, 2023, 2037, 2047, 2055, 2071, 2081, 2100.0]	35	92	2	r1i1p1	MIROC–ESM–CHEM	RCP4.5	1	1917	1861	1975	100	73.1425	0.284715	100	1917	0.8	1916	0.19
940	r1i1p1_MIROC–ESM–CHEM_RCP4.5_098.final.csv	[1861.0, 1917, 1975, 1995, 2007, 2023, 2037, 2047, 2055, 2071, 2081, 2100.0]	35	92	2	r1i1p1	MIROC–ESM–CHEM	RCP4.5	1	1975	1917	1995	100	38.9506	0.227283	100	1975	0.74	1976	0.25
941	r1i1p1_MIROC–ESM–CHEM_RCP4.5_098.final.csv	[1861.0, 1917, 1975, 1995, 2007, 2023, 2037, 2047, 2055, 2071, 2081, 2100.0]	35	92	2	r1i1p1	MIROC–ESM–CHEM	RCP4.5	1	1995	1975	2007	100	17.028	0.280661	100	1995	0.95	1994	0.04
942	r1i1p1_MIROC–ESM–CHEM_RCP4.5_098.final.csv	[1861.0, 1917, 1975, 1995, 2007, 2023, 2037, 2047, 2055, 2071, 2081, 2100.0]	35	92	2	r1i1p1	MIROC–ESM–CHEM	RCP4.5	1	2007	1995	2023	100	21.8685	0.455888	100	2007	0.94	2006	0.06
943	r1i1p1_MIROC–ESM–CHEM_RCP4.5_098.final.csv	[1861.0, 1917, 1975, 1995, 2007, 2023, 2037, 2047, 2055, 2071, 2081, 2100.0]	35	92	2	r1i1p1	MIROC–ESM–CHEM	RCP4.5	1	2023	2007	2037	1	25.7254	0.606225	100	2023	1	0	0
944	r1i1p1_MIROC–ESM–CHEM_RCP4.5_098.final.csv	[1861.0, 1917, 1975, 1995, 2007, 2023, 2037, 2047, 2055, 2071, 2081, 2100.0]	35	92	2	r1i1p1	MIROC–ESM–CHEM	RCP4.5	1	2037	2023	2047	1	15.9433	0.332352	1	2037	0.72	2040	0.21
945	r1i1p1_MIROC–ESM–CHEM_RCP4.5_098.final.csv	[1861.0, 1917, 1975, 1995, 2007, 2023, 2037, 2047, 2055, 2071, 2081, 2100.0]	35	92	2	r1i1p1	MIROC–ESM–CHEM	RCP4.5	1	2047	2037	2055	1	13.1456	0.357504	1	2047	0.86	2048	0.12
946	r1i1p1_MIROC–ESM–CHEM_RCP4.5_098.final.csv	[1861.0, 1917, 1975, 1995, 2007, 2023, 2037, 2047, 2055, 2071, 2081, 2100.0]	35	92	2	r1i1p1	MIROC–ESM–CHEM	RCP4.5	1	2055	2047	2071	1	17.086	0.301943	100	2055	0.95	2056	0.02
947	r1i1p1_MIROC–ESM–CHEM_RCP4.5_098.final.csv	[1861.0, 1917, 1975, 1995, 2007, 2023, 2037, 2047, 2055, 2071, 2081, 2100.0]	35	92	2	r1i1p1	MIROC–ESM–CHEM	RCP4.5	1	2071	2055	2081	100	17.8482	0.25655	100	2071	1	0	0
948	r1i1p1_MIROC–ESM–CHEM_RCP4.5_098.final.csv	[1861.0, 1917, 1975, 1995, 2007, 2023, 2037, 2047, 2055, 2071, 2081, 2100.0]	35	92	2	r1i1p1	MIROC–ESM–CHEM	RCP4.5	1	2081	2071	2100	100	13.3261	0.138634	100	2081	0.99	2077	0.01
Seq	Source	BreakSet	DatasetNo	SetNo	SetNoInData	Type	Model	Treat	%BreakSet	Year	Predecessor	Successor	%SegmentFound	Ti	Shift	%YearOverall	ModalYear	ModalValue	SecondModalYear	SecondModalValue
949	r1i1p1_MPI–ESM–LR_RCP4.5_099.final.csv	[1861.0, 1908, 1970, 1997, 2010, 2027, 2036, 2061, 2100.0]	36	93	1	r1i1p1	MPI–ESM–LR	RCP4.5	100	1908	1861	1970	100	36.9376	0.205438	100	1908	0.91	1911	0.05
950	r1i1p1_MPI–ESM–LR_RCP4.5_099.final.csv	[1861.0, 1908, 1970, 1997, 2010, 2027, 2036, 2061, 2100.0]	36	93	1	r1i1p1	MPI–ESM–LR	RCP4.5	100	1970	1908	1997	100	66.0886	0.479906	100	1970	0.99	1971	0.01
951	r1i1p1_MPI–ESM–LR_RCP4.5_099.final.csv	[1861.0, 1908, 1970, 1997, 2010, 2027, 2036, 2061, 2100.0]	36	93	1	r1i1p1	MPI–ESM–LR	RCP4.5	100	1997	1970	2010	100	25.3382	0.443291	100	1997	1	0	0
952	r1i1p1_MPI–ESM–LR_RCP4.5_099.final.csv	[1861.0, 1908, 1970, 1997, 2010, 2027, 2036, 2061, 2100.0]	36	93	1	r1i1p1	MPI–ESM–LR	RCP4.5	100	2010	1997	2027	100	21.7275	0.341384	100	2010	0.98	2008	0.01
953	r1i1p1_MPI–ESM–LR_RCP4.5_099.final.csv	[1861.0, 1908, 1970, 1997, 2010, 2027, 2036, 2061, 2100.0]	36	93	1	r1i1p1	MPI–ESM–LR	RCP4.5	100	2027	2010	2036	100	14.8605	0.31147	100	2027	0.89	2028	0.06
954	r1i1p1_MPI–ESM–LR_RCP4.5_099.final.csv	[1861.0, 1908, 1970, 1997, 2010, 2027, 2036, 2061, 2100.0]	36	93	1	r1i1p1	MPI–ESM–LR	RCP4.5	100	2036	2027	2061	100	16.5889	0.311711	100	2036	0.63	2042	0.2
955	r1i1p1_MPI–ESM–LR_RCP4.5_099.final.csv	[1861.0, 1908, 1970, 1997, 2010, 2027, 2036, 2061, 2100.0]	36	93	1	r1i1p1	MPI–ESM–LR	RCP4.5	100	2061	2036	2100	100	37.6545	0.374334	100	2061	0.99	2057	0.01
Seq	Source	BreakSet	DatasetNo	SetNo	SetNoInData	Type	Model	Treat	%BreakSet	Year	Predecessor	Successor	%SegmentFound	Ti	Shift	%YearOverall	ModalYear	ModalValue	SecondModalYear	SecondModalValue
956	r1i1p1_MPI–ESM–MR_RCP4.5_102.final.csv	[1861.0, 1883, 1891, 1919, 1970, 1988, 1996, 2006, 2021, 2039, 2048, 2073, 2100.0]	37	94	1	r1i1p1	MPI–ESM–MR	RCP4.5	100	1883	1861	1891	100	20.5206	–0.321806295702	100	1883	1	0	0
957	r1i1p1_MPI–ESM–MR_RCP4.5_102.final.csv	[1861.0, 1883, 1891, 1919, 1970, 1988, 1996, 2006, 2021, 2039, 2048, 2073, 2100.0]	37	94	1	r1i1p1	MPI–ESM–MR	RCP4.5	100	1891	1883	1919	100	21.3488	0.243157	100	1891	0.61	1892	0.39
958	r1i1p1_MPI–ESM–MR_RCP4.5_102.final.csv	[1861.0, 1883, 1891, 1919, 1970, 1988, 1996, 2006, 2021, 2039, 2048, 2073, 2100.0]	37	94	1	r1i1p1	MPI–ESM–MR	RCP4.5	100	1919	1891	1970	100	50.3765	0.279053	100	1919	0.97	1918	0.03
959	r1i1p1_MPI–ESM–MR_RCP4.5_102.final.csv	[1861.0, 1883, 1891, 1919, 1970, 1988, 1996, 2006, 2021, 2039, 2048, 2073, 2100.0]	37	94	1	r1i1p1	MPI–ESM–MR	RCP4.5	100	1970	1919	1988	100	35.866	0.238208	100	1970	0.84	1969	0.15
960	r1i1p1_MPI–ESM–MR_RCP4.5_102.final.csv	[1861.0, 1883, 1891, 1919, 1970, 1988, 1996, 2006, 2021, 2039, 2048, 2073, 2100.0]	37	94	1	r1i1p1	MPI–ESM–MR	RCP4.5	100	1988	1970	1996	100	16.608	0.257228	100	1988	0.99	1986	0.01
961	r1i1p1_MPI–ESM–MR_RCP4.5_102.final.csv	[1861.0, 1883, 1891, 1919, 1970, 1988, 1996, 2006, 2021, 2039, 2048, 2073, 2100.0]	37	94	1	r1i1p1	MPI–ESM–MR	RCP4.5	100	1996	1988	2006	100	13.6555	0.291655	100	1996	0.99	1995	0.01
962	r1i1p1_MPI–ESM–MR_RCP4.5_102.final.csv	[1861.0, 1883, 1891, 1919, 1970, 1988, 1996, 2006, 2021, 2039, 2048, 2073, 2100.0]	37	94	1	r1i1p1	MPI–ESM–MR	RCP4.5	100	2006	1996	2021	100	16.3575	0.225584	100	2006	0.74	2007	0.25
963	r1i1p1_MPI–ESM–MR_RCP4.5_102.final.csv	[1861.0, 1883, 1891, 1919, 1970, 1988, 1996, 2006, 2021, 2039, 2048, 2073, 2100.0]	37	94	1	r1i1p1	MPI–ESM–MR	RCP4.5	100	2021	2006	2039	100	25.8992	0.348936	100	2021	0.9	2022	0.07
964	r1i1p1_MPI–ESM–MR_RCP4.5_102.final.csv	[1861.0, 1883, 1891, 1919, 1970, 1988, 1996, 2006, 2021, 2039, 2048, 2073, 2100.0]	37	94	1	r1i1p1	MPI–ESM–MR	RCP4.5	100	2039	2021	2048	100	20.9396	0.338717	100	2039	0.8	2040	0.2
965	r1i1p1_MPI–ESM–MR_RCP4.5_102.final.csv	[1861.0, 1883, 1891, 1919, 1970, 1988, 1996, 2006, 2021, 2039, 2048, 2073, 2100.0]	37	94	1	r1i1p1	MPI–ESM–MR	RCP4.5	100	2048	2039	2073	100	18.6542	0.320352	100	2048	0.75	2049	0.19
966	r1i1p1_MPI–ESM–MR_RCP4.5_102.final.csv	[1861.0, 1883, 1891, 1919, 1970, 1988, 1996, 2006, 2021, 2039, 2048, 2073, 2100.0]	37	94	1	r1i1p1	MPI–ESM–MR	RCP4.5	100	2073	2048	2100	100	23.0484	0.241589	100	2073	0.8	2074	0.16
Seq	Source	BreakSet	DatasetNo	SetNo	SetNoInData	Type	Model	Treat	%BreakSet	Year	Predecessor	Successor	%SegmentFound	Ti	Shift	%YearOverall	ModalYear	ModalValue	SecondModalYear	SecondModalValue
967	r1i1p1_MRI–CGCM3_RCP4.5_105.final.csv	[1861.0, 1882, 1907, 1933, 1975, 2001, 2020, 2037, 2046, 2068, 2080, 2100.0]	38	95	1	r1i1p1	MRI–CGCM3	RCP4.5	100	1882	1861	1907	100	13.7792	–0.131093136807	100	1882	0.95	1883	0.05
968	r1i1p1_MRI–CGCM3_RCP4.5_105.final.csv	[1861.0, 1882, 1907, 1933, 1975, 2001, 2020, 2037, 2046, 2068, 2080, 2100.0]	38	95	1	r1i1p1	MRI–CGCM3	RCP4.5	100	1907	1882	1933	100	25.6166	0.195789	100	1907	1	0	0
969	r1i1p1_MRI–CGCM3_RCP4.5_105.final.csv	[1861.0, 1882, 1907, 1933, 1975, 2001, 2020, 2037, 2046, 2068, 2080, 2100.0]	38	95	1	r1i1p1	MRI–CGCM3	RCP4.5	100	1933	1907	1975	100	17.6281	0.0899503	100	1933	1	0	0
970	r1i1p1_MRI–CGCM3_RCP4.5_105.final.csv	[1861.0, 1882, 1907, 1933, 1975, 2001, 2020, 2037, 2046, 2068, 2080, 2100.0]	38	95	1	r1i1p1	MRI–CGCM3	RCP4.5	100	1975	1933	2001	100	34.3855	0.167274	100	1975	0.88	1974	0.12
971	r1i1p1_MRI–CGCM3_RCP4.5_105.final.csv	[1861.0, 1882, 1907, 1933, 1975, 2001, 2020, 2037, 2046, 2068, 2080, 2100.0]	38	95	1	r1i1p1	MRI–CGCM3	RCP4.5	100	2001	1975	2020	100	31.4999	0.267434	100	2001	0.83	2002	0.13
972	r1i1p1_MRI–CGCM3_RCP4.5_105.final.csv	[1861.0, 1882, 1907, 1933, 1975, 2001, 2020, 2037, 2046, 2068, 2080, 2100.0]	38	95	1	r1i1p1	MRI–CGCM3	RCP4.5	100	2020	2001	2037	100	30.3343	0.425207	100	2020	1	0	0
973	r1i1p1_MRI–CGCM3_RCP4.5_105.final.csv	[1861.0, 1882, 1907, 1933, 1975, 2001, 2020, 2037, 2046, 2068, 2080, 2100.0]	38	95	1	r1i1p1	MRI–CGCM3	RCP4.5	100	2037	2020	2046	100	14.5019	0.185274	100	2037	0.93	2030	0.04
974	r1i1p1_MRI–CGCM3_RCP4.5_105.final.csv	[1861.0, 1882, 1907, 1933, 1975, 2001, 2020, 2037, 2046, 2068, 2080, 2100.0]	38	95	1	r1i1p1	MRI–CGCM3	RCP4.5	100	2046	2037	2068	100	22.1123	0.305116	100	2046	0.95	2047	0.03
975	r1i1p1_MRI–CGCM3_RCP4.5_105.final.csv	[1861.0, 1882, 1907, 1933, 1975, 2001, 2020, 2037, 2046, 2068, 2080, 2100.0]	38	95	1	r1i1p1	MRI–CGCM3	RCP4.5	100	2068	2046	2080	100	24.1937	0.28446	100	2068	0.82	2067	0.07
976	r1i1p1_MRI–CGCM3_RCP4.5_105.final.csv	[1861.0, 1882, 1907, 1933, 1975, 2001, 2020, 2037, 2046, 2068, 2080, 2100.0]	38	95	1	r1i1p1	MRI–CGCM3	RCP4.5	100	2080	2068	2100	100	20.2214	0.250622	100	2080	0.98	2085	0.01
Seq	Source	BreakSet	DatasetNo	SetNo	SetNoInData	Type	Model	Treat	%BreakSet	Year	Predecessor	Successor	%SegmentFound	Ti	Shift	%YearOverall	ModalYear	ModalValue	SecondModalYear	SecondModalValue
977	r1i1p1_NorESM1–M_RCP4.5_106.final.csv	[1861.0, 1909, 1976, 1998, 2011, 2022, 2035, 2056, 2070, 2088, 2100.0]	39	96	1	r1i1p1	NorESM1–M	RCP4.5	20	1909	1861	1976	100	36.0354	0.145041	100	1909	0.86	1913	0.08
978	r1i1p1_NorESM1–M_RCP4.5_106.final.csv	[1861.0, 1909, 1976, 1998, 2011, 2022, 2035, 2056, 2070, 2088, 2100.0]	39	96	1	r1i1p1	NorESM1–M	RCP4.5	20	1976	1909	1998	100	50.4907	0.279124	100	1976	0.96	1977	0.04
979	r1i1p1_NorESM1–M_RCP4.5_106.final.csv	[1861.0, 1909, 1976, 1998, 2011, 2022, 2035, 2056, 2070, 2088, 2100.0]	39	96	1	r1i1p1	NorESM1–M	RCP4.5	20	1998	1976	2011	100	23.6774	0.318545	100	1998	0.97	1997	0.03
980	r1i1p1_NorESM1–M_RCP4.5_106.final.csv	[1861.0, 1909, 1976, 1998, 2011, 2022, 2035, 2056, 2070, 2088, 2100.0]	39	96	1	r1i1p1	NorESM1–M	RCP4.5	20	2011	1998	2022	100	16.0462	0.245648	100	2011	0.93	2015	0.03
981	r1i1p1_NorESM1–M_RCP4.5_106.final.csv	[1861.0, 1909, 1976, 1998, 2011, 2022, 2035, 2056, 2070, 2088, 2100.0]	39	96	1	r1i1p1	NorESM1–M	RCP4.5	20	2022	2011	2035	20	16.0553	0.2823	100	2022	0.93	2018	0.04
982	r1i1p1_NorESM1–M_RCP4.5_106.final.csv	[1861.0, 1909, 1976, 1998, 2011, 2022, 2035, 2056, 2070, 2088, 2100.0]	39	96	1	r1i1p1	NorESM1–M	RCP4.5	20	2035	2022	2056	20	25.8304	0.355134	20	2035	0.43	2037	0.32
983	r1i1p1_NorESM1–M_RCP4.5_106.final.csv	[1861.0, 1909, 1976, 1998, 2011, 2022, 2035, 2056, 2070, 2088, 2100.0]	39	96	1	r1i1p1	NorESM1–M	RCP4.5	20	2056	2035	2070	20	24.4047	0.255919	100	2056	0.92	2054	0.06
984	r1i1p1_NorESM1–M_RCP4.5_106.final.csv	[1861.0, 1909, 1976, 1998, 2011, 2022, 2035, 2056, 2070, 2088, 2100.0]	39	96	1	r1i1p1	NorESM1–M	RCP4.5	20	2070	2056	2088	100	21.543	0.188615	100	2070	0.98	2068	0.01
985	r1i1p1_NorESM1–M_RCP4.5_106.final.csv	[1861.0, 1909, 1976, 1998, 2011, 2022, 2035, 2056, 2070, 2088, 2100.0]	39	96	1	r1i1p1	NorESM1–M	RCP4.5	20	2088	2070	2100	100	20.7443	0.191288	100	2088	0.7	2089	0.3
986	r1i1p1_NorESM1–M_RCP4.5_106.final.csv	[1861.0, 1909, 1976, 1998, 2011, 2022, 2037, 2056, 2070, 2088, 2100.0]	39	97	2	r1i1p1	NorESM1–M	RCP4.5	43	1909	1861	1976	100	36.0354	0.145041	100	1909	0.86	1913	0.08
987	r1i1p1_NorESM1–M_RCP4.5_106.final.csv	[1861.0, 1909, 1976, 1998, 2011, 2022, 2037, 2056, 2070, 2088, 2100.0]	39	97	2	r1i1p1	NorESM1–M	RCP4.5	43	1976	1909	1998	100	50.4907	0.279124	100	1976	0.96	1977	0.04
988	r1i1p1_NorESM1–M_RCP4.5_106.final.csv	[1861.0, 1909, 1976, 1998, 2011, 2022, 2037, 2056, 2070, 2088, 2100.0]	39	97	2	r1i1p1	NorESM1–M	RCP4.5	43	1998	1976	2011	100	23.6774	0.318545	100	1998	0.97	1997	0.03
989	r1i1p1_NorESM1–M_RCP4.5_106.final.csv	[1861.0, 1909, 1976, 1998, 2011, 2022, 2037, 2056, 2070, 2088, 2100.0]	39	97	2	r1i1p1	NorESM1–M	RCP4.5	43	2011	1998	2022	100	16.0462	0.245648	100	2011	0.93	2015	0.03
990	r1i1p1_NorESM1–M_RCP4.5_106.final.csv	[1861.0, 1909, 1976, 1998, 2011, 2022, 2037, 2056, 2070, 2088, 2100.0]	39	97	2	r1i1p1	NorESM1–M	RCP4.5	43	2022	2011	2037	43	17.2176	0.306227	100	2022	0.89	2027	0.06
991	r1i1p1_NorESM1–M_RCP4.5_106.final.csv	[1861.0, 1909, 1976, 1998, 2011, 2022, 2037, 2056, 2070, 2088, 2100.0]	39	97	2	r1i1p1	NorESM1–M	RCP4.5	43	2037	2022	2056	43	25.8304	0.355134	43	2035	0.43	2037	0.32
992	r1i1p1_NorESM1–M_RCP4.5_106.final.csv	[1861.0, 1909, 1976, 1998, 2011, 2022, 2037, 2056, 2070, 2088, 2100.0]	39	97	2	r1i1p1	NorESM1–M	RCP4.5	43	2056	2037	2070	43	23.9288	0.238042	100	2056	0.98	2054	0.02
993	r1i1p1_NorESM1–M_RCP4.5_106.final.csv	[1861.0, 1909, 1976, 1998, 2011, 2022, 2037, 2056, 2070, 2088, 2100.0]	39	97	2	r1i1p1	NorESM1–M	RCP4.5	43	2070	2056	2088	100	21.543	0.188615	100	2070	0.98	2068	0.01
994	r1i1p1_NorESM1–M_RCP4.5_106.final.csv	[1861.0, 1909, 1976, 1998, 2011, 2022, 2037, 2056, 2070, 2088, 2100.0]	39	97	2	r1i1p1	NorESM1–M	RCP4.5	43	2088	2070	2100	100	20.7443	0.191288	100	2088	0.7	2089	0.3
995	r1i1p1_NorESM1–M_RCP4.5_106.final.csv	[1861.0, 1909, 1976, 1998, 2011, 2022, 2036, 2056, 2070, 2088, 2100.0]	39	98	3	r1i1p1	NorESM1–M	RCP4.5	37	1909	1861	1976	100	36.0354	0.145041	100	1909	0.86	1913	0.08
996	r1i1p1_NorESM1–M_RCP4.5_106.final.csv	[1861.0, 1909, 1976, 1998, 2011, 2022, 2036, 2056, 2070, 2088, 2100.0]	39	98	3	r1i1p1	NorESM1–M	RCP4.5	37	1976	1909	1998	100	50.4907	0.279124	100	1976	0.96	1977	0.04
997	r1i1p1_NorESM1–M_RCP4.5_106.final.csv	[1861.0, 1909, 1976, 1998, 2011, 2022, 2036, 2056, 2070, 2088, 2100.0]	39	98	3	r1i1p1	NorESM1–M	RCP4.5	37	1998	1976	2011	100	23.6774	0.318545	100	1998	0.97	1997	0.03
998	r1i1p1_NorESM1–M_RCP4.5_106.final.csv	[1861.0, 1909, 1976, 1998, 2011, 2022, 2036, 2056, 2070, 2088, 2100.0]	39	98	3	r1i1p1	NorESM1–M	RCP4.5	37	2011	1998	2022	100	16.0462	0.245648	100	2011	0.93	2015	0.03
999	r1i1p1_NorESM1–M_RCP4.5_106.final.csv	[1861.0, 1909, 1976, 1998, 2011, 2022, 2036, 2056, 2070, 2088, 2100.0]	39	98	3	r1i1p1	NorESM1–M	RCP4.5	37	2022	2011	2036	37	16.6431	0.294645	100	2022	0.93	2021	0.05
1000	r1i1p1_NorESM1–M_RCP4.5_106.final.csv	[1861.0, 1909, 1976, 1998, 2011, 2022, 2036, 2056, 2070, 2088, 2100.0]	39	98	3	r1i1p1	NorESM1–M	RCP4.5	37	2036	2022	2056	37	25.8304	0.355134	37	2035	0.43	2037	0.32
1001	r1i1p1_NorESM1–M_RCP4.5_106.final.csv	[1861.0, 1909, 1976, 1998, 2011, 2022, 2036, 2056, 2070, 2088, 2100.0]	39	98	3	r1i1p1	NorESM1–M	RCP4.5	37	2056	2036	2070	37	24.1772	0.247837	100	2056	0.94	2054	0.04
1002	r1i1p1_NorESM1–M_RCP4.5_106.final.csv	[1861.0, 1909, 1976, 1998, 2011, 2022, 2036, 2056, 2070, 2088, 2100.0]	39	98	3	r1i1p1	NorESM1–M	RCP4.5	37	2070	2056	2088	100	21.543	0.188615	100	2070	0.98	2068	0.01
1003	r1i1p1_NorESM1–M_RCP4.5_106.final.csv	[1861.0, 1909, 1976, 1998, 2011, 2022, 2036, 2056, 2070, 2088, 2100.0]	39	98	3	r1i1p1	NorESM1–M	RCP4.5	37	2088	2070	2100	100	20.7443	0.191288	100	2088	0.7	2089	0.3
Seq	Source	BreakSet	DatasetNo	SetNo	SetNoInData	Type	Model	Treat	%BreakSet	Year	Predecessor	Successor	%SegmentFound	Ti	Shift	%YearOverall	ModalYear	ModalValue	SecondModalYear	SecondModalValue
1004	r1i1p1_NorESM1–ME_RCP4.5_107.final.csv	[1861.0, 1923, 1977, 1999, 2012, 2026, 2035, 2049, 2067, 2083, 2100.0]	40	99	1	r1i1p1	NorESM1–ME	RCP4.5	3	1923	1861	1977	100	49.2324	0.179125	100	1923	0.98	1913	0.02
1005	r1i1p1_NorESM1–ME_RCP4.5_107.final.csv	[1861.0, 1923, 1977, 1999, 2012, 2026, 2035, 2049, 2067, 2083, 2100.0]	40	99	1	r1i1p1	NorESM1–ME	RCP4.5	3	1977	1923	1999	100	36.6298	0.227542	100	1977	1	0	0
1006	r1i1p1_NorESM1–ME_RCP4.5_107.final.csv	[1861.0, 1923, 1977, 1999, 2012, 2026, 2035, 2049, 2067, 2083, 2100.0]	40	99	1	r1i1p1	NorESM1–ME	RCP4.5	3	1999	1977	2012	100	27.0822	0.442141	100	1999	0.93	1998	0.07
1007	r1i1p1_NorESM1–ME_RCP4.5_107.final.csv	[1861.0, 1923, 1977, 1999, 2012, 2026, 2035, 2049, 2067, 2083, 2100.0]	40	99	1	r1i1p1	NorESM1–ME	RCP4.5	3	2012	1999	2026	52	16.1635	0.221838	100	2012	1	0	0
1008	r1i1p1_NorESM1–ME_RCP4.5_107.final.csv	[1861.0, 1923, 1977, 1999, 2012, 2026, 2035, 2049, 2067, 2083, 2100.0]	40	99	1	r1i1p1	NorESM1–ME	RCP4.5	3	2026	2012	2035	3	15.3553	0.228742	52	2026	0.46	2023	0.2
1009	r1i1p1_NorESM1–ME_RCP4.5_107.final.csv	[1861.0, 1923, 1977, 1999, 2012, 2026, 2035, 2049, 2067, 2083, 2100.0]	40	99	1	r1i1p1	NorESM1–ME	RCP4.5	3	2035	2026	2049	3	16.0016	0.26483	3	2039	0.99	2037	0.01
1010	r1i1p1_NorESM1–ME_RCP4.5_107.final.csv	[1861.0, 1923, 1977, 1999, 2012, 2026, 2035, 2049, 2067, 2083, 2100.0]	40	99	1	r1i1p1	NorESM1–ME	RCP4.5	3	2049	2035	2067	3	22.5249	0.337971	100	2049	0.97	2045	0.03
1011	r1i1p1_NorESM1–ME_RCP4.5_107.final.csv	[1861.0, 1923, 1977, 1999, 2012, 2026, 2035, 2049, 2067, 2083, 2100.0]	40	99	1	r1i1p1	NorESM1–ME	RCP4.5	3	2067	2049	2083	100	22.6391	0.244989	100	2067	0.75	2069	0.15
1012	r1i1p1_NorESM1–ME_RCP4.5_107.final.csv	[1861.0, 1923, 1977, 1999, 2012, 2026, 2035, 2049, 2067, 2083, 2100.0]	40	99	1	r1i1p1	NorESM1–ME	RCP4.5	3	2083	2067	2100	100	12.8666	0.126911	100	2083	0.87	2088	0.13
1013	r1i1p1_NorESM1–ME_RCP4.5_107.final.csv	[1861.0, 1923, 1977, 1999, 2012, 2027, 2039, 2049, 2067, 2083, 2100.0]	40	100	2	r1i1p1	NorESM1–ME	RCP4.5	48	1923	1861	1977	100	49.2324	0.179125	100	1923	0.98	1913	0.02
1014	r1i1p1_NorESM1–ME_RCP4.5_107.final.csv	[1861.0, 1923, 1977, 1999, 2012, 2027, 2039, 2049, 2067, 2083, 2100.0]	40	100	2	r1i1p1	NorESM1–ME	RCP4.5	48	1977	1923	1999	100	36.6298	0.227542	100	1977	1	0	0
1015	r1i1p1_NorESM1–ME_RCP4.5_107.final.csv	[1861.0, 1923, 1977, 1999, 2012, 2027, 2039, 2049, 2067, 2083, 2100.0]	40	100	2	r1i1p1	NorESM1–ME	RCP4.5	48	1999	1977	2012	100	27.0822	0.442141	100	1999	0.93	1998	0.07
1016	r1i1p1_NorESM1–ME_RCP4.5_107.final.csv	[1861.0, 1923, 1977, 1999, 2012, 2027, 2039, 2049, 2067, 2083, 2100.0]	40	100	2	r1i1p1	NorESM1–ME	RCP4.5	48	2012	1999	2027	48	16.9861	0.232213	100	2012	1	0	0
1017	r1i1p1_NorESM1–ME_RCP4.5_107.final.csv	[1861.0, 1923, 1977, 1999, 2012, 2027, 2039, 2049, 2067, 2083, 2100.0]	40	100	2	r1i1p1	NorESM1–ME	RCP4.5	48	2027	2012	2039	48	18.8603	0.267415	48	2026	0.56	2027	0.4
1018	r1i1p1_NorESM1–ME_RCP4.5_107.final.csv	[1861.0, 1923, 1977, 1999, 2012, 2027, 2039, 2049, 2067, 2083, 2100.0]	40	100	2	r1i1p1	NorESM1–ME	RCP4.5	48	2039	2027	2049	48	15.3048	0.254095	97	2039	0.97	2044	0.02
1019	r1i1p1_NorESM1–ME_RCP4.5_107.final.csv	[1861.0, 1923, 1977, 1999, 2012, 2027, 2039, 2049, 2067, 2083, 2100.0]	40	100	2	r1i1p1	NorESM1–ME	RCP4.5	48	2049	2039	2067	97	18.7579	0.286648	100	2049	0.99	2050	0.01
1020	r1i1p1_NorESM1–ME_RCP4.5_107.final.csv	[1861.0, 1923, 1977, 1999, 2012, 2027, 2039, 2049, 2067, 2083, 2100.0]	40	100	2	r1i1p1	NorESM1–ME	RCP4.5	48	2067	2049	2083	100	22.6391	0.244989	100	2067	0.75	2069	0.15
1021	r1i1p1_NorESM1–ME_RCP4.5_107.final.csv	[1861.0, 1923, 1977, 1999, 2012, 2027, 2039, 2049, 2067, 2083, 2100.0]	40	100	2	r1i1p1	NorESM1–ME	RCP4.5	48	2083	2067	2100	100	12.8666	0.126911	100	2083	0.87	2088	0.13
1022	r1i1p1_NorESM1–ME_RCP4.5_107.final.csv	[1861.0, 1923, 1977, 1999, 2012, 2026, 2039, 2049, 2067, 2083, 2100.0]	40	101	3	r1i1p1	NorESM1–ME	RCP4.5	49	1923	1861	1977	100	49.2324	0.179125	100	1923	0.98	1913	0.02
1023	r1i1p1_NorESM1–ME_RCP4.5_107.final.csv	[1861.0, 1923, 1977, 1999, 2012, 2026, 2039, 2049, 2067, 2083, 2100.0]	40	101	3	r1i1p1	NorESM1–ME	RCP4.5	49	1977	1923	1999	100	36.6298	0.227542	100	1977	1	0	0
1024	r1i1p1_NorESM1–ME_RCP4.5_107.final.csv	[1861.0, 1923, 1977, 1999, 2012, 2026, 2039, 2049, 2067, 2083, 2100.0]	40	101	3	r1i1p1	NorESM1–ME	RCP4.5	49	1999	1977	2012	100	27.0822	0.442141	100	1999	0.93	1998	0.07
1025	r1i1p1_NorESM1–ME_RCP4.5_107.final.csv	[1861.0, 1923, 1977, 1999, 2012, 2026, 2039, 2049, 2067, 2083, 2100.0]	40	101	3	r1i1p1	NorESM1–ME	RCP4.5	49	2012	1999	2026	52	16.1635	0.221838	100	2012	1	0	0
1026	r1i1p1_NorESM1–ME_RCP4.5_107.final.csv	[1861.0, 1923, 1977, 1999, 2012, 2026, 2039, 2049, 2067, 2083, 2100.0]	40	101	3	r1i1p1	NorESM1–ME	RCP4.5	49	2026	2012	2039	49	18.8603	0.267415	52	2026	0.56	2027	0.4
1027	r1i1p1_NorESM1–ME_RCP4.5_107.final.csv	[1861.0, 1923, 1977, 1999, 2012, 2026, 2039, 2049, 2067, 2083, 2100.0]	40	101	3	r1i1p1	NorESM1–ME	RCP4.5	49	2039	2026	2049	49	16.0016	0.26483	97	2039	0.99	2037	0.01
1028	r1i1p1_NorESM1–ME_RCP4.5_107.final.csv	[1861.0, 1923, 1977, 1999, 2012, 2026, 2039, 2049, 2067, 2083, 2100.0]	40	101	3	r1i1p1	NorESM1–ME	RCP4.5	49	2049	2039	2067	97	18.7579	0.286648	100	2049	0.99	2050	0.01
1029	r1i1p1_NorESM1–ME_RCP4.5_107.final.csv	[1861.0, 1923, 1977, 1999, 2012, 2026, 2039, 2049, 2067, 2083, 2100.0]	40	101	3	r1i1p1	NorESM1–ME	RCP4.5	49	2067	2049	2083	100	22.6391	0.244989	100	2067	0.75	2069	0.15
1030	r1i1p1_NorESM1–ME_RCP4.5_107.final.csv	[1861.0, 1923, 1977, 1999, 2012, 2026, 2039, 2049, 2067, 2083, 2100.0]	40	101	3	r1i1p1	NorESM1–ME	RCP4.5	49	2083	2067	2100	100	12.8666	0.126911	100	2083	0.87	2088	0.13
Seq	Source	BreakSet	DatasetNo	SetNo	SetNoInData	Type	Model	Treat	%BreakSet	Year	Predecessor	Successor	%SegmentFound	Ti	Shift	%YearOverall	ModalYear	ModalValue	SecondModalYear	SecondModalValue
1031	r1i1p2_GISS–E2–H_RCP4.5_052.final.csv	[1861.0, 1895, 1920, 1963, 1977, 1999, 2011, 2021, 2033, 2047, 2058, 2070, 2094, 2100.0]	41	102	1	r1i1p2	GISS–E2–H	RCP4.5	100	1895	1861	1920	100	21.3181	0.16007	100	1895	0.77	1893	0.12
1032	r1i1p2_GISS–E2–H_RCP4.5_052.final.csv	[1861.0, 1895, 1920, 1963, 1977, 1999, 2011, 2021, 2033, 2047, 2058, 2070, 2094, 2100.0]	41	102	1	r1i1p2	GISS–E2–H	RCP4.5	100	1920	1895	1963	100	45.0785	0.197721	100	1920	1	0	0
1033	r1i1p2_GISS–E2–H_RCP4.5_052.final.csv	[1861.0, 1895, 1920, 1963, 1977, 1999, 2011, 2021, 2033, 2047, 2058, 2070, 2094, 2100.0]	41	102	1	r1i1p2	GISS–E2–H	RCP4.5	100	1963	1920	1977	100	17.3797	–0.101926046377	100	1963	0.99	1950	0.01
1034	r1i1p2_GISS–E2–H_RCP4.5_052.final.csv	[1861.0, 1895, 1920, 1963, 1977, 1999, 2011, 2021, 2033, 2047, 2058, 2070, 2094, 2100.0]	41	102	1	r1i1p2	GISS–E2–H	RCP4.5	100	1977	1963	1999	100	25.7424	0.34545	100	1977	0.95	1978	0.05
1035	r1i1p2_GISS–E2–H_RCP4.5_052.final.csv	[1861.0, 1895, 1920, 1963, 1977, 1999, 2011, 2021, 2033, 2047, 2058, 2070, 2094, 2100.0]	41	102	1	r1i1p2	GISS–E2–H	RCP4.5	100	1999	1977	2011	100	25.6234	0.400406	100	1999	0.99	1995	0.01
1036	r1i1p2_GISS–E2–H_RCP4.5_052.final.csv	[1861.0, 1895, 1920, 1963, 1977, 1999, 2011, 2021, 2033, 2047, 2058, 2070, 2094, 2100.0]	41	102	1	r1i1p2	GISS–E2–H	RCP4.5	100	2011	1999	2021	100	15.2179	0.233968	100	2011	0.71	2010	0.25
1037	r1i1p2_GISS–E2–H_RCP4.5_052.final.csv	[1861.0, 1895, 1920, 1963, 1977, 1999, 2011, 2021, 2033, 2047, 2058, 2070, 2094, 2100.0]	41	102	1	r1i1p2	GISS–E2–H	RCP4.5	100	2021	2011	2033	100	17.7201	0.279595	100	2021	0.92	2020	0.06
1038	r1i1p2_GISS–E2–H_RCP4.5_052.final.csv	[1861.0, 1895, 1920, 1963, 1977, 1999, 2011, 2021, 2033, 2047, 2058, 2070, 2094, 2100.0]	41	102	1	r1i1p2	GISS–E2–H	RCP4.5	100	2033	2021	2047	100	19.342	0.255049	100	2033	0.62	2034	0.26
1039	r1i1p2_GISS–E2–H_RCP4.5_052.final.csv	[1861.0, 1895, 1920, 1963, 1977, 1999, 2011, 2021, 2033, 2047, 2058, 2070, 2094, 2100.0]	41	102	1	r1i1p2	GISS–E2–H	RCP4.5	100	2047	2033	2058	100	17.9676	0.225249	100	2047	0.88	2045	0.09
1040	r1i1p2_GISS–E2–H_RCP4.5_052.final.csv	[1861.0, 1895, 1920, 1963, 1977, 1999, 2011, 2021, 2033, 2047, 2058, 2070, 2094, 2100.0]	41	102	1	r1i1p2	GISS–E2–H	RCP4.5	100	2058	2047	2070	100	15.0373	0.163344	100	2058	0.8	2062	0.09
1041	r1i1p2_GISS–E2–H_RCP4.5_052.final.csv	[1861.0, 1895, 1920, 1963, 1977, 1999, 2011, 2021, 2033, 2047, 2058, 2070, 2094, 2100.0]	41	102	1	r1i1p2	GISS–E2–H	RCP4.5	100	2070	2058	2094	100	23.4038	0.136345	100	2070	0.94	2071	0.03
1042	r1i1p2_GISS–E2–H_RCP4.5_052.final.csv	[1861.0, 1895, 1920, 1963, 1977, 1999, 2011, 2021, 2033, 2047, 2058, 2070, 2094, 2100.0]	41	102	1	r1i1p2	GISS–E2–H	RCP4.5	100	2094	2070	2100	100	12.9782	0.0856062	100	2094	0.52	2089	0.25
Seq	Source	BreakSet	DatasetNo	SetNo	SetNoInData	Type	Model	Treat	%BreakSet	Year	Predecessor	Successor	%SegmentFound	Ti	Shift	%YearOverall	ModalYear	ModalValue	SecondModalYear	SecondModalValue
1043	r1i1p2_GISS–E2–R_RCP4.5_069.final.csv	[1861.0, 1926, 1977, 1998, 2011, 2026, 2036, 2046, 2053, 2063, 2080, 2100.0]	42	103	1	r1i1p2	GISS–E2–R	RCP4.5	75	1926	1861	1977	100	77.5847	0.268939	100	1926	0.86	1925	0.14
1044	r1i1p2_GISS–E2–R_RCP4.5_069.final.csv	[1861.0, 1926, 1977, 1998, 2011, 2026, 2036, 2046, 2053, 2063, 2080, 2100.0]	42	103	1	r1i1p2	GISS–E2–R	RCP4.5	75	1977	1926	1998	75	16.6083	0.108748	100	1977	0.97	1970	0.03
1045	r1i1p2_GISS–E2–R_RCP4.5_069.final.csv	[1861.0, 1926, 1977, 1998, 2011, 2026, 2036, 2046, 2053, 2063, 2080, 2100.0]	42	103	1	r1i1p2	GISS–E2–R	RCP4.5	75	1998	1977	2011	75	23.7734	0.374813	75	1998	0.67	1999	0.26
1046	r1i1p2_GISS–E2–R_RCP4.5_069.final.csv	[1861.0, 1926, 1977, 1998, 2011, 2026, 2036, 2046, 2053, 2063, 2080, 2100.0]	42	103	1	r1i1p2	GISS–E2–R	RCP4.5	75	2011	1998	2026	75	15.8801	0.179396	100	2011	0.89	2010	0.1
1047	r1i1p2_GISS–E2–R_RCP4.5_069.final.csv	[1861.0, 1926, 1977, 1998, 2011, 2026, 2036, 2046, 2053, 2063, 2080, 2100.0]	42	103	1	r1i1p2	GISS–E2–R	RCP4.5	75	2026	2011	2036	100	18.579	0.23587	100	2026	0.91	2027	0.08
1048	r1i1p2_GISS–E2–R_RCP4.5_069.final.csv	[1861.0, 1926, 1977, 1998, 2011, 2026, 2036, 2046, 2053, 2063, 2080, 2100.0]	42	103	1	r1i1p2	GISS–E2–R	RCP4.5	75	2036	2026	2046	100	13.9675	0.192497	100	2036	0.94	2034	0.03
1049	r1i1p2_GISS–E2–R_RCP4.5_069.final.csv	[1861.0, 1926, 1977, 1998, 2011, 2026, 2036, 2046, 2053, 2063, 2080, 2100.0]	42	103	1	r1i1p2	GISS–E2–R	RCP4.5	75	2046	2036	2053	100	9.93612	0.119984	100	2046	0.84	2044	0.11
1050	r1i1p2_GISS–E2–R_RCP4.5_069.final.csv	[1861.0, 1926, 1977, 1998, 2011, 2026, 2036, 2046, 2053, 2063, 2080, 2100.0]	42	103	1	r1i1p2	GISS–E2–R	RCP4.5	75	2053	2046	2063	100	11.0622	0.0954801	100	2053	0.89	2052	0.08
1051	r1i1p2_GISS–E2–R_RCP4.5_069.final.csv	[1861.0, 1926, 1977, 1998, 2011, 2026, 2036, 2046, 2053, 2063, 2080, 2100.0]	42	103	1	r1i1p2	GISS–E2–R	RCP4.5	75	2063	2053	2080	100	18.5083	0.0990467	100	2063	0.75	2064	0.22
1052	r1i1p2_GISS–E2–R_RCP4.5_069.final.csv	[1861.0, 1926, 1977, 1998, 2011, 2026, 2036, 2046, 2053, 2063, 2080, 2100.0]	42	103	1	r1i1p2	GISS–E2–R	RCP4.5	75	2080	2063	2100	100	29.145	0.180469	100	2080	1	0	0
1053	r1i1p2_GISS–E2–R_RCP4.5_069.final.csv	[1861.0, 1926, 1977, 1999, 2011, 2026, 2036, 2046, 2053, 2063, 2080, 2100.0]	42	104	2	r1i1p2	GISS–E2–R	RCP4.5	25	1926	1861	1977	100	77.5847	0.268939	100	1926	0.86	1925	0.14
1054	r1i1p2_GISS–E2–R_RCP4.5_069.final.csv	[1861.0, 1926, 1977, 1999, 2011, 2026, 2036, 2046, 2053, 2063, 2080, 2100.0]	42	104	2	r1i1p2	GISS–E2–R	RCP4.5	25	1977	1926	1999	25	18.7842	0.11819	100	1977	0.99	1970	0.01
1055	r1i1p2_GISS–E2–R_RCP4.5_069.final.csv	[1861.0, 1926, 1977, 1999, 2011, 2026, 2036, 2046, 2053, 2063, 2080, 2100.0]	42	104	2	r1i1p2	GISS–E2–R	RCP4.5	25	1999	1977	2011	25	23.7734	0.374813	25	1998	0.67	1999	0.26
1056	r1i1p2_GISS–E2–R_RCP4.5_069.final.csv	[1861.0, 1926, 1977, 1999, 2011, 2026, 2036, 2046, 2053, 2063, 2080, 2100.0]	42	104	2	r1i1p2	GISS–E2–R	RCP4.5	25	2011	1999	2026	25	15.5419	0.165045	100	2011	0.92	2010	0.06
1057	r1i1p2_GISS–E2–R_RCP4.5_069.final.csv	[1861.0, 1926, 1977, 1999, 2011, 2026, 2036, 2046, 2053, 2063, 2080, 2100.0]	42	104	2	r1i1p2	GISS–E2–R	RCP4.5	25	2026	2011	2036	100	18.579	0.23587	100	2026	0.91	2027	0.08
1058	r1i1p2_GISS–E2–R_RCP4.5_069.final.csv	[1861.0, 1926, 1977, 1999, 2011, 2026, 2036, 2046, 2053, 2063, 2080, 2100.0]	42	104	2	r1i1p2	GISS–E2–R	RCP4.5	25	2036	2026	2046	100	13.9675	0.192497	100	2036	0.94	2034	0.03
1059	r1i1p2_GISS–E2–R_RCP4.5_069.final.csv	[1861.0, 1926, 1977, 1999, 2011, 2026, 2036, 2046, 2053, 2063, 2080, 2100.0]	42	104	2	r1i1p2	GISS–E2–R	RCP4.5	25	2046	2036	2053	100	9.93612	0.119984	100	2046	0.84	2044	0.11
1060	r1i1p2_GISS–E2–R_RCP4.5_069.final.csv	[1861.0, 1926, 1977, 1999, 2011, 2026, 2036, 2046, 2053, 2063, 2080, 2100.0]	42	104	2	r1i1p2	GISS–E2–R	RCP4.5	25	2053	2046	2063	100	11.0622	0.0954801	100	2053	0.89	2052	0.08
1061	r1i1p2_GISS–E2–R_RCP4.5_069.final.csv	[1861.0, 1926, 1977, 1999, 2011, 2026, 2036, 2046, 2053, 2063, 2080, 2100.0]	42	104	2	r1i1p2	GISS–E2–R	RCP4.5	25	2063	2053	2080	100	18.5083	0.0990467	100	2063	0.75	2064	0.22
1062	r1i1p2_GISS–E2–R_RCP4.5_069.final.csv	[1861.0, 1926, 1977, 1999, 2011, 2026, 2036, 2046, 2053, 2063, 2080, 2100.0]	42	104	2	r1i1p2	GISS–E2–R	RCP4.5	25	2080	2063	2100	100	29.145	0.180469	100	2080	1	0	0
Seq	Source	BreakSet	DatasetNo	SetNo	SetNoInData	Type	Model	Treat	%BreakSet	Year	Predecessor	Successor	%SegmentFound	Ti	Shift	%YearOverall	ModalYear	ModalValue	SecondModalYear	SecondModalValue
1063	r1i1p3_GISS–E2–H_RCP4.5_057.final.csv	[1861.0, 1863, 1882, 1891, 1917, 1935, 1971, 1994, 2001, 2013, 2022, 2035, 2047, 2059, 2069, 2084, 2100.0]	43	105	1	r1i1p3	GISS–E2–H	RCP4.5	3	1863	1861	1882	100	10.6484	0.156765	100	1863	1	0	0
1064	r1i1p3_GISS–E2–H_RCP4.5_057.final.csv	[1861.0, 1863, 1882, 1891, 1917, 1935, 1971, 1994, 2001, 2013, 2022, 2035, 2047, 2059, 2069, 2084, 2100.0]	43	105	1	r1i1p3	GISS–E2–H	RCP4.5	3	1882	1863	1891	100	22.0211	–0.345029965988	100	1882	0.96	1883	0.04
1065	r1i1p3_GISS–E2–H_RCP4.5_057.final.csv	[1861.0, 1863, 1882, 1891, 1917, 1935, 1971, 1994, 2001, 2013, 2022, 2035, 2047, 2059, 2069, 2084, 2100.0]	43	105	1	r1i1p3	GISS–E2–H	RCP4.5	3	1891	1882	1917	95	20.5252	0.283465	100	1891	0.72	1892	0.27
1066	r1i1p3_GISS–E2–H_RCP4.5_057.final.csv	[1861.0, 1863, 1882, 1891, 1917, 1935, 1971, 1994, 2001, 2013, 2022, 2035, 2047, 2059, 2069, 2084, 2100.0]	43	105	1	r1i1p3	GISS–E2–H	RCP4.5	3	1917	1891	1935	95	27.93	0.251555	95	1917	0.91	1913	0.03
1067	r1i1p3_GISS–E2–H_RCP4.5_057.final.csv	[1861.0, 1863, 1882, 1891, 1917, 1935, 1971, 1994, 2001, 2013, 2022, 2035, 2047, 2059, 2069, 2084, 2100.0]	43	105	1	r1i1p3	GISS–E2–H	RCP4.5	3	1935	1917	1971	95	21.8018	0.124879	95	1935	0.97	1929	0.02
1068	r1i1p3_GISS–E2–H_RCP4.5_057.final.csv	[1861.0, 1863, 1882, 1891, 1917, 1935, 1971, 1994, 2001, 2013, 2022, 2035, 2047, 2059, 2069, 2084, 2100.0]	43	105	1	r1i1p3	GISS–E2–H	RCP4.5	3	1971	1935	1994	95	31.3033	0.177414	100	1971	1	0	0
1069	r1i1p3_GISS–E2–H_RCP4.5_057.final.csv	[1861.0, 1863, 1882, 1891, 1917, 1935, 1971, 1994, 2001, 2013, 2022, 2035, 2047, 2059, 2069, 2084, 2100.0]	43	105	1	r1i1p3	GISS–E2–H	RCP4.5	3	1994	1971	2001	100	18.2397	0.293802	100	1994	0.74	1996	0.12
1070	r1i1p3_GISS–E2–H_RCP4.5_057.final.csv	[1861.0, 1863, 1882, 1891, 1917, 1935, 1971, 1994, 2001, 2013, 2022, 2035, 2047, 2059, 2069, 2084, 2100.0]	43	105	1	r1i1p3	GISS–E2–H	RCP4.5	3	2001	1994	2013	100	14.2561	0.296847	100	2001	0.95	2000	0.04
1071	r1i1p3_GISS–E2–H_RCP4.5_057.final.csv	[1861.0, 1863, 1882, 1891, 1917, 1935, 1971, 1994, 2001, 2013, 2022, 2035, 2047, 2059, 2069, 2084, 2100.0]	43	105	1	r1i1p3	GISS–E2–H	RCP4.5	3	2013	2001	2022	100	15.82	0.212709	100	2013	0.97	2010	0.03
1072	r1i1p3_GISS–E2–H_RCP4.5_057.final.csv	[1861.0, 1863, 1882, 1891, 1917, 1935, 1971, 1994, 2001, 2013, 2022, 2035, 2047, 2059, 2069, 2084, 2100.0]	43	105	1	r1i1p3	GISS–E2–H	RCP4.5	3	2022	2013	2035	98	16.0985	0.25094	100	2022	0.79	2025	0.18
1073	r1i1p3_GISS–E2–H_RCP4.5_057.final.csv	[1861.0, 1863, 1882, 1891, 1917, 1935, 1971, 1994, 2001, 2013, 2022, 2035, 2047, 2059, 2069, 2084, 2100.0]	43	105	1	r1i1p3	GISS–E2–H	RCP4.5	3	2035	2022	2047	98	19.72	0.343893	98	2035	0.79	2034	0.15
1074	r1i1p3_GISS–E2–H_RCP4.5_057.final.csv	[1861.0, 1863, 1882, 1891, 1917, 1935, 1971, 1994, 2001, 2013, 2022, 2035, 2047, 2059, 2069, 2084, 2100.0]	43	105	1	r1i1p3	GISS–E2–H	RCP4.5	3	2047	2035	2059	42	18.4016	0.280701	98	2047	0.92	2048	0.05
1075	r1i1p3_GISS–E2–H_RCP4.5_057.final.csv	[1861.0, 1863, 1882, 1891, 1917, 1935, 1971, 1994, 2001, 2013, 2022, 2035, 2047, 2059, 2069, 2084, 2100.0]	43	105	1	r1i1p3	GISS–E2–H	RCP4.5	3	2059	2047	2069	3	13.5868	0.192983	42	2059	0.74	2062	0.14
1076	r1i1p3_GISS–E2–H_RCP4.5_057.final.csv	[1861.0, 1863, 1882, 1891, 1917, 1935, 1971, 1994, 2001, 2013, 2022, 2035, 2047, 2059, 2069, 2084, 2100.0]	43	105	1	r1i1p3	GISS–E2–H	RCP4.5	3	2069	2059	2084	3	14.9457	0.176761	5	2068	0.81	2069	0.13
1077	r1i1p3_GISS–E2–H_RCP4.5_057.final.csv	[1861.0, 1863, 1882, 1891, 1917, 1935, 1971, 1994, 2001, 2013, 2022, 2035, 2047, 2059, 2069, 2084, 2100.0]	43	105	1	r1i1p3	GISS–E2–H	RCP4.5	3	2084	2069	2100	5	20.9417	0.172006	45	2084	0.86	2083	0.09
1078	r1i1p3_GISS–E2–H_RCP4.5_057.final.csv	[1861.0, 1863, 1882, 1891, 1910, 1928, 1971, 1994, 2001, 2013, 2022, 2035, 2047, 2059, 2066, 2077, 2084, 2100.0]	43	106	2	r1i1p3	GISS–E2–H	RCP4.5	3	1863	1861	1882	100	10.6484	0.156765	100	1863	1	0	0
1079	r1i1p3_GISS–E2–H_RCP4.5_057.final.csv	[1861.0, 1863, 1882, 1891, 1910, 1928, 1971, 1994, 2001, 2013, 2022, 2035, 2047, 2059, 2066, 2077, 2084, 2100.0]	43	106	2	r1i1p3	GISS–E2–H	RCP4.5	3	1882	1863	1891	100	22.0211	–0.345029965988	100	1882	0.96	1883	0.04
1080	r1i1p3_GISS–E2–H_RCP4.5_057.final.csv	[1861.0, 1863, 1882, 1891, 1910, 1928, 1971, 1994, 2001, 2013, 2022, 2035, 2047, 2059, 2066, 2077, 2084, 2100.0]	43	106	2	r1i1p3	GISS–E2–H	RCP4.5	3	1891	1882	1910	5	16.1065	0.247443	100	1891	0.95	1892	0.04
1081	r1i1p3_GISS–E2–H_RCP4.5_057.final.csv	[1861.0, 1863, 1882, 1891, 1910, 1928, 1971, 1994, 2001, 2013, 2022, 2035, 2047, 2059, 2066, 2077, 2084, 2100.0]	43	106	2	r1i1p3	GISS–E2–H	RCP4.5	3	1910	1891	1928	5	21.1315	0.209173	5	1910	0.8	1914	0.06
1082	r1i1p3_GISS–E2–H_RCP4.5_057.final.csv	[1861.0, 1863, 1882, 1891, 1910, 1928, 1971, 1994, 2001, 2013, 2022, 2035, 2047, 2059, 2066, 2077, 2084, 2100.0]	43	106	2	r1i1p3	GISS–E2–H	RCP4.5	3	1928	1910	1971	5	33.1349	0.188853	5	1928	0.94	1929	0.05
1083	r1i1p3_GISS–E2–H_RCP4.5_057.final.csv	[1861.0, 1863, 1882, 1891, 1910, 1928, 1971, 1994, 2001, 2013, 2022, 2035, 2047, 2059, 2066, 2077, 2084, 2100.0]	43	106	2	r1i1p3	GISS–E2–H	RCP4.5	3	1971	1928	1994	5	35.4962	0.190477	100	1971	1	0	0
1084	r1i1p3_GISS–E2–H_RCP4.5_057.final.csv	[1861.0, 1863, 1882, 1891, 1910, 1928, 1971, 1994, 2001, 2013, 2022, 2035, 2047, 2059, 2066, 2077, 2084, 2100.0]	43	106	2	r1i1p3	GISS–E2–H	RCP4.5	3	1994	1971	2001	100	18.2397	0.293802	100	1994	0.74	1996	0.12
1085	r1i1p3_GISS–E2–H_RCP4.5_057.final.csv	[1861.0, 1863, 1882, 1891, 1910, 1928, 1971, 1994, 2001, 2013, 2022, 2035, 2047, 2059, 2066, 2077, 2084, 2100.0]	43	106	2	r1i1p3	GISS–E2–H	RCP4.5	3	2001	1994	2013	100	14.2561	0.296847	100	2001	0.95	2000	0.04
1086	r1i1p3_GISS–E2–H_RCP4.5_057.final.csv	[1861.0, 1863, 1882, 1891, 1910, 1928, 1971, 1994, 2001, 2013, 2022, 2035, 2047, 2059, 2066, 2077, 2084, 2100.0]	43	106	2	r1i1p3	GISS–E2–H	RCP4.5	3	2013	2001	2022	100	15.82	0.212709	100	2013	0.97	2010	0.03
1087	r1i1p3_GISS–E2–H_RCP4.5_057.final.csv	[1861.0, 1863, 1882, 1891, 1910, 1928, 1971, 1994, 2001, 2013, 2022, 2035, 2047, 2059, 2066, 2077, 2084, 2100.0]	43	106	2	r1i1p3	GISS–E2–H	RCP4.5	3	2022	2013	2035	98	16.0985	0.25094	100	2022	0.79	2025	0.18
1088	r1i1p3_GISS–E2–H_RCP4.5_057.final.csv	[1861.0, 1863, 1882, 1891, 1910, 1928, 1971, 1994, 2001, 2013, 2022, 2035, 2047, 2059, 2066, 2077, 2084, 2100.0]	43	106	2	r1i1p3	GISS–E2–H	RCP4.5	3	2035	2022	2047	98	19.72	0.343893	98	2035	0.79	2034	0.15
1089	r1i1p3_GISS–E2–H_RCP4.5_057.final.csv	[1861.0, 1863, 1882, 1891, 1910, 1928, 1971, 1994, 2001, 2013, 2022, 2035, 2047, 2059, 2066, 2077, 2084, 2100.0]	43	106	2	r1i1p3	GISS–E2–H	RCP4.5	3	2047	2035	2059	42	18.4016	0.280701	98	2047	0.92	2048	0.05
1090	r1i1p3_GISS–E2–H_RCP4.5_057.final.csv	[1861.0, 1863, 1882, 1891, 1910, 1928, 1971, 1994, 2001, 2013, 2022, 2035, 2047, 2059, 2066, 2077, 2084, 2100.0]	43	106	2	r1i1p3	GISS–E2–H	RCP4.5	3	2059	2047	2066	33	10.3751	0.163158	42	2059	0.63	2054	0.16
1091	r1i1p3_GISS–E2–H_RCP4.5_057.final.csv	[1861.0, 1863, 1882, 1891, 1910, 1928, 1971, 1994, 2001, 2013, 2022, 2035, 2047, 2059, 2066, 2077, 2084, 2100.0]	43	106	2	r1i1p3	GISS–E2–H	RCP4.5	3	2066	2059	2077	30	9.69086	0.142988	33	2066	0.73	2068	0.19
1092	r1i1p3_GISS–E2–H_RCP4.5_057.final.csv	[1861.0, 1863, 1882, 1891, 1910, 1928, 1971, 1994, 2001, 2013, 2022, 2035, 2047, 2059, 2066, 2077, 2084, 2100.0]	43	106	2	r1i1p3	GISS–E2–H	RCP4.5	3	2077	2066	2084	30	11.1184	0.106117	30	2077	0.99	2076	0.01
1093	r1i1p3_GISS–E2–H_RCP4.5_057.final.csv	[1861.0, 1863, 1882, 1891, 1910, 1928, 1971, 1994, 2001, 2013, 2022, 2035, 2047, 2059, 2066, 2077, 2084, 2100.0]	43	106	2	r1i1p3	GISS–E2–H	RCP4.5	3	2084	2077	2100	30	12.5232	0.123614	45	2084	0.87	2093	0.08
1094	r1i1p3_GISS–E2–H_RCP4.5_057.final.csv	[1861.0, 1863, 1882, 1891, 1917, 1935, 1971, 1994, 2001, 2013, 2022, 2033, 2041, 2049, 2062, 2069, 2084, 2100.0]	43	107	3	r1i1p3	GISS–E2–H	RCP4.5	1	1863	1861	1882	100	10.6484	0.156765	100	1863	1	0	0
1095	r1i1p3_GISS–E2–H_RCP4.5_057.final.csv	[1861.0, 1863, 1882, 1891, 1917, 1935, 1971, 1994, 2001, 2013, 2022, 2033, 2041, 2049, 2062, 2069, 2084, 2100.0]	43	107	3	r1i1p3	GISS–E2–H	RCP4.5	1	1882	1863	1891	100	22.0211	–0.345029965988	100	1882	0.96	1883	0.04
1096	r1i1p3_GISS–E2–H_RCP4.5_057.final.csv	[1861.0, 1863, 1882, 1891, 1917, 1935, 1971, 1994, 2001, 2013, 2022, 2033, 2041, 2049, 2062, 2069, 2084, 2100.0]	43	107	3	r1i1p3	GISS–E2–H	RCP4.5	1	1891	1882	1917	95	20.5252	0.283465	100	1891	0.72	1892	0.27
1097	r1i1p3_GISS–E2–H_RCP4.5_057.final.csv	[1861.0, 1863, 1882, 1891, 1917, 1935, 1971, 1994, 2001, 2013, 2022, 2033, 2041, 2049, 2062, 2069, 2084, 2100.0]	43	107	3	r1i1p3	GISS–E2–H	RCP4.5	1	1917	1891	1935	95	27.93	0.251555	95	1917	0.91	1913	0.03
1098	r1i1p3_GISS–E2–H_RCP4.5_057.final.csv	[1861.0, 1863, 1882, 1891, 1917, 1935, 1971, 1994, 2001, 2013, 2022, 2033, 2041, 2049, 2062, 2069, 2084, 2100.0]	43	107	3	r1i1p3	GISS–E2–H	RCP4.5	1	1935	1917	1971	95	21.8018	0.124879	95	1935	0.97	1929	0.02
1099	r1i1p3_GISS–E2–H_RCP4.5_057.final.csv	[1861.0, 1863, 1882, 1891, 1917, 1935, 1971, 1994, 2001, 2013, 2022, 2033, 2041, 2049, 2062, 2069, 2084, 2100.0]	43	107	3	r1i1p3	GISS–E2–H	RCP4.5	1	1971	1935	1994	95	31.3033	0.177414	100	1971	1	0	0
1100	r1i1p3_GISS–E2–H_RCP4.5_057.final.csv	[1861.0, 1863, 1882, 1891, 1917, 1935, 1971, 1994, 2001, 2013, 2022, 2033, 2041, 2049, 2062, 2069, 2084, 2100.0]	43	107	3	r1i1p3	GISS–E2–H	RCP4.5	1	1994	1971	2001	100	18.2397	0.293802	100	1994	0.74	1996	0.12
1101	r1i1p3_GISS–E2–H_RCP4.5_057.final.csv	[1861.0, 1863, 1882, 1891, 1917, 1935, 1971, 1994, 2001, 2013, 2022, 2033, 2041, 2049, 2062, 2069, 2084, 2100.0]	43	107	3	r1i1p3	GISS–E2–H	RCP4.5	1	2001	1994	2013	100	14.2561	0.296847	100	2001	0.95	2000	0.04
1102	r1i1p3_GISS–E2–H_RCP4.5_057.final.csv	[1861.0, 1863, 1882, 1891, 1917, 1935, 1971, 1994, 2001, 2013, 2022, 2033, 2041, 2049, 2062, 2069, 2084, 2100.0]	43	107	3	r1i1p3	GISS–E2–H	RCP4.5	1	2013	2001	2022	100	15.82	0.212709	100	2013	0.97	2010	0.03
1103	r1i1p3_GISS–E2–H_RCP4.5_057.final.csv	[1861.0, 1863, 1882, 1891, 1917, 1935, 1971, 1994, 2001, 2013, 2022, 2033, 2041, 2049, 2062, 2069, 2084, 2100.0]	43	107	3	r1i1p3	GISS–E2–H	RCP4.5	1	2022	2013	2033	2	15.4971	0.223271	100	2022	0.99	2025	0.01
1104	r1i1p3_GISS–E2–H_RCP4.5_057.final.csv	[1861.0, 1863, 1882, 1891, 1917, 1935, 1971, 1994, 2001, 2013, 2022, 2033, 2041, 2049, 2062, 2069, 2084, 2100.0]	43	107	3	r1i1p3	GISS–E2–H	RCP4.5	1	2033	2022	2041	2	14.6927	0.269286	2	2033	0.89	2034	0.08
1105	r1i1p3_GISS–E2–H_RCP4.5_057.final.csv	[1861.0, 1863, 1882, 1891, 1917, 1935, 1971, 1994, 2001, 2013, 2022, 2033, 2041, 2049, 2062, 2069, 2084, 2100.0]	43	107	3	r1i1p3	GISS–E2–H	RCP4.5	1	2041	2033	2049	2	10.8634	0.199564	2	2041	0.9	2040	0.04
1106	r1i1p3_GISS–E2–H_RCP4.5_057.final.csv	[1861.0, 1863, 1882, 1891, 1917, 1935, 1971, 1994, 2001, 2013, 2022, 2033, 2041, 2049, 2062, 2069, 2084, 2100.0]	43	107	3	r1i1p3	GISS–E2–H	RCP4.5	1	2049	2041	2062	2	15.2454	0.227923	2	2049	0.65	2048	0.14
1107	r1i1p3_GISS–E2–H_RCP4.5_057.final.csv	[1861.0, 1863, 1882, 1891, 1917, 1935, 1971, 1994, 2001, 2013, 2022, 2033, 2041, 2049, 2062, 2069, 2084, 2100.0]	43	107	3	r1i1p3	GISS–E2–H	RCP4.5	1	2062	2049	2069	1	12.4581	0.183083	3	2062	0.56	2059	0.26
1108	r1i1p3_GISS–E2–H_RCP4.5_057.final.csv	[1861.0, 1863, 1882, 1891, 1917, 1935, 1971, 1994, 2001, 2013, 2022, 2033, 2041, 2049, 2062, 2069, 2084, 2100.0]	43	107	3	r1i1p3	GISS–E2–H	RCP4.5	1	2069	2062	2084	2	11.996	0.141242	5	2069	0.57	2068	0.27
1109	r1i1p3_GISS–E2–H_RCP4.5_057.final.csv	[1861.0, 1863, 1882, 1891, 1917, 1935, 1971, 1994, 2001, 2013, 2022, 2033, 2041, 2049, 2062, 2069, 2084, 2100.0]	43	107	3	r1i1p3	GISS–E2–H	RCP4.5	1	2084	2069	2100	5	20.9417	0.172006	45	2084	0.86	2083	0.09
1110	r1i1p3_GISS–E2–H_RCP4.5_057.final.csv	[1861.0, 1863, 1882, 1891, 1917, 1935, 1971, 1994, 2001, 2013, 2022, 2035, 2047, 2063, 2100.0]	43	108	4	r1i1p3	GISS–E2–H	RCP4.5	48	1863	1861	1882	100	10.6484	0.156765	100	1863	1	0	0
1111	r1i1p3_GISS–E2–H_RCP4.5_057.final.csv	[1861.0, 1863, 1882, 1891, 1917, 1935, 1971, 1994, 2001, 2013, 2022, 2035, 2047, 2063, 2100.0]	43	108	4	r1i1p3	GISS–E2–H	RCP4.5	48	1882	1863	1891	100	22.0211	–0.345029965988	100	1882	0.96	1883	0.04
1112	r1i1p3_GISS–E2–H_RCP4.5_057.final.csv	[1861.0, 1863, 1882, 1891, 1917, 1935, 1971, 1994, 2001, 2013, 2022, 2035, 2047, 2063, 2100.0]	43	108	4	r1i1p3	GISS–E2–H	RCP4.5	48	1891	1882	1917	95	20.5252	0.283465	100	1891	0.72	1892	0.27
1113	r1i1p3_GISS–E2–H_RCP4.5_057.final.csv	[1861.0, 1863, 1882, 1891, 1917, 1935, 1971, 1994, 2001, 2013, 2022, 2035, 2047, 2063, 2100.0]	43	108	4	r1i1p3	GISS–E2–H	RCP4.5	48	1917	1891	1935	95	27.93	0.251555	95	1917	0.91	1913	0.03
1114	r1i1p3_GISS–E2–H_RCP4.5_057.final.csv	[1861.0, 1863, 1882, 1891, 1917, 1935, 1971, 1994, 2001, 2013, 2022, 2035, 2047, 2063, 2100.0]	43	108	4	r1i1p3	GISS–E2–H	RCP4.5	48	1935	1917	1971	95	21.8018	0.124879	95	1935	0.97	1929	0.02
1115	r1i1p3_GISS–E2–H_RCP4.5_057.final.csv	[1861.0, 1863, 1882, 1891, 1917, 1935, 1971, 1994, 2001, 2013, 2022, 2035, 2047, 2063, 2100.0]	43	108	4	r1i1p3	GISS–E2–H	RCP4.5	48	1971	1935	1994	95	31.3033	0.177414	100	1971	1	0	0
1116	r1i1p3_GISS–E2–H_RCP4.5_057.final.csv	[1861.0, 1863, 1882, 1891, 1917, 1935, 1971, 1994, 2001, 2013, 2022, 2035, 2047, 2063, 2100.0]	43	108	4	r1i1p3	GISS–E2–H	RCP4.5	48	1994	1971	2001	100	18.2397	0.293802	100	1994	0.74	1996	0.12
1117	r1i1p3_GISS–E2–H_RCP4.5_057.final.csv	[1861.0, 1863, 1882, 1891, 1917, 1935, 1971, 1994, 2001, 2013, 2022, 2035, 2047, 2063, 2100.0]	43	108	4	r1i1p3	GISS–E2–H	RCP4.5	48	2001	1994	2013	100	14.2561	0.296847	100	2001	0.95	2000	0.04
1118	r1i1p3_GISS–E2–H_RCP4.5_057.final.csv	[1861.0, 1863, 1882, 1891, 1917, 1935, 1971, 1994, 2001, 2013, 2022, 2035, 2047, 2063, 2100.0]	43	108	4	r1i1p3	GISS–E2–H	RCP4.5	48	2013	2001	2022	100	15.82	0.212709	100	2013	0.97	2010	0.03
1119	r1i1p3_GISS–E2–H_RCP4.5_057.final.csv	[1861.0, 1863, 1882, 1891, 1917, 1935, 1971, 1994, 2001, 2013, 2022, 2035, 2047, 2063, 2100.0]	43	108	4	r1i1p3	GISS–E2–H	RCP4.5	48	2022	2013	2035	98	16.0985	0.25094	100	2022	0.79	2025	0.18
1120	r1i1p3_GISS–E2–H_RCP4.5_057.final.csv	[1861.0, 1863, 1882, 1891, 1917, 1935, 1971, 1994, 2001, 2013, 2022, 2035, 2047, 2063, 2100.0]	43	108	4	r1i1p3	GISS–E2–H	RCP4.5	48	2035	2022	2047	98	19.72	0.343893	98	2035	0.79	2034	0.15
1121	r1i1p3_GISS–E2–H_RCP4.5_057.final.csv	[1861.0, 1863, 1882, 1891, 1917, 1935, 1971, 1994, 2001, 2013, 2022, 2035, 2047, 2063, 2100.0]	43	108	4	r1i1p3	GISS–E2–H	RCP4.5	48	2047	2035	2063	55	21.3428	0.312795	98	2047	0.48	2048	0.47
1122	r1i1p3_GISS–E2–H_RCP4.5_057.final.csv	[1861.0, 1863, 1882, 1891, 1917, 1935, 1971, 1994, 2001, 2013, 2022, 2035, 2047, 2063, 2100.0]	43	108	4	r1i1p3	GISS–E2–H	RCP4.5	48	2063	2047	2100	49	38.2215	0.368502	55	2068	0.74	2066	0.15
1123	r1i1p3_GISS–E2–H_RCP4.5_057.final.csv	[1861.0, 1863, 1882, 1891, 1917, 1935, 1971, 1994, 2001, 2013, 2022, 2033, 2041, 2049, 2062, 2084, 2100.0]	43	109	5	r1i1p3	GISS–E2–H	RCP4.5	1	1863	1861	1882	100	10.6484	0.156765	100	1863	1	0	0
1124	r1i1p3_GISS–E2–H_RCP4.5_057.final.csv	[1861.0, 1863, 1882, 1891, 1917, 1935, 1971, 1994, 2001, 2013, 2022, 2033, 2041, 2049, 2062, 2084, 2100.0]	43	109	5	r1i1p3	GISS–E2–H	RCP4.5	1	1882	1863	1891	100	22.0211	–0.345029965988	100	1882	0.96	1883	0.04
1125	r1i1p3_GISS–E2–H_RCP4.5_057.final.csv	[1861.0, 1863, 1882, 1891, 1917, 1935, 1971, 1994, 2001, 2013, 2022, 2033, 2041, 2049, 2062, 2084, 2100.0]	43	109	5	r1i1p3	GISS–E2–H	RCP4.5	1	1891	1882	1917	95	20.5252	0.283465	100	1891	0.72	1892	0.27
1126	r1i1p3_GISS–E2–H_RCP4.5_057.final.csv	[1861.0, 1863, 1882, 1891, 1917, 1935, 1971, 1994, 2001, 2013, 2022, 2033, 2041, 2049, 2062, 2084, 2100.0]	43	109	5	r1i1p3	GISS–E2–H	RCP4.5	1	1917	1891	1935	95	27.93	0.251555	95	1917	0.91	1913	0.03
1127	r1i1p3_GISS–E2–H_RCP4.5_057.final.csv	[1861.0, 1863, 1882, 1891, 1917, 1935, 1971, 1994, 2001, 2013, 2022, 2033, 2041, 2049, 2062, 2084, 2100.0]	43	109	5	r1i1p3	GISS–E2–H	RCP4.5	1	1935	1917	1971	95	21.8018	0.124879	95	1935	0.97	1929	0.02
1128	r1i1p3_GISS–E2–H_RCP4.5_057.final.csv	[1861.0, 1863, 1882, 1891, 1917, 1935, 1971, 1994, 2001, 2013, 2022, 2033, 2041, 2049, 2062, 2084, 2100.0]	43	109	5	r1i1p3	GISS–E2–H	RCP4.5	1	1971	1935	1994	95	31.3033	0.177414	100	1971	1	0	0
1129	r1i1p3_GISS–E2–H_RCP4.5_057.final.csv	[1861.0, 1863, 1882, 1891, 1917, 1935, 1971, 1994, 2001, 2013, 2022, 2033, 2041, 2049, 2062, 2084, 2100.0]	43	109	5	r1i1p3	GISS–E2–H	RCP4.5	1	1994	1971	2001	100	18.2397	0.293802	100	1994	0.74	1996	0.12
1130	r1i1p3_GISS–E2–H_RCP4.5_057.final.csv	[1861.0, 1863, 1882, 1891, 1917, 1935, 1971, 1994, 2001, 2013, 2022, 2033, 2041, 2049, 2062, 2084, 2100.0]	43	109	5	r1i1p3	GISS–E2–H	RCP4.5	1	2001	1994	2013	100	14.2561	0.296847	100	2001	0.95	2000	0.04
1131	r1i1p3_GISS–E2–H_RCP4.5_057.final.csv	[1861.0, 1863, 1882, 1891, 1917, 1935, 1971, 1994, 2001, 2013, 2022, 2033, 2041, 2049, 2062, 2084, 2100.0]	43	109	5	r1i1p3	GISS–E2–H	RCP4.5	1	2013	2001	2022	100	15.82	0.212709	100	2013	0.97	2010	0.03
1132	r1i1p3_GISS–E2–H_RCP4.5_057.final.csv	[1861.0, 1863, 1882, 1891, 1917, 1935, 1971, 1994, 2001, 2013, 2022, 2033, 2041, 2049, 2062, 2084, 2100.0]	43	109	5	r1i1p3	GISS–E2–H	RCP4.5	1	2022	2013	2033	2	15.4971	0.223271	100	2022	0.99	2025	0.01
1133	r1i1p3_GISS–E2–H_RCP4.5_057.final.csv	[1861.0, 1863, 1882, 1891, 1917, 1935, 1971, 1994, 2001, 2013, 2022, 2033, 2041, 2049, 2062, 2084, 2100.0]	43	109	5	r1i1p3	GISS–E2–H	RCP4.5	1	2033	2022	2041	2	14.6927	0.269286	2	2033	0.89	2034	0.08
1134	r1i1p3_GISS–E2–H_RCP4.5_057.final.csv	[1861.0, 1863, 1882, 1891, 1917, 1935, 1971, 1994, 2001, 2013, 2022, 2033, 2041, 2049, 2062, 2084, 2100.0]	43	109	5	r1i1p3	GISS–E2–H	RCP4.5	1	2041	2033	2049	2	10.8634	0.199564	2	2041	0.9	2040	0.04
1135	r1i1p3_GISS–E2–H_RCP4.5_057.final.csv	[1861.0, 1863, 1882, 1891, 1917, 1935, 1971, 1994, 2001, 2013, 2022, 2033, 2041, 2049, 2062, 2084, 2100.0]	43	109	5	r1i1p3	GISS–E2–H	RCP4.5	1	2049	2041	2062	2	15.2454	0.227923	2	2049	0.65	2048	0.14
1136	r1i1p3_GISS–E2–H_RCP4.5_057.final.csv	[1861.0, 1863, 1882, 1891, 1917, 1935, 1971, 1994, 2001, 2013, 2022, 2033, 2041, 2049, 2062, 2084, 2100.0]	43	109	5	r1i1p3	GISS–E2–H	RCP4.5	1	2062	2049	2084	1	25.8171	0.275064	3	2063	0.95	2066	0.03
1137	r1i1p3_GISS–E2–H_RCP4.5_057.final.csv	[1861.0, 1863, 1882, 1891, 1917, 1935, 1971, 1994, 2001, 2013, 2022, 2033, 2041, 2049, 2062, 2084, 2100.0]	43	109	5	r1i1p3	GISS–E2–H	RCP4.5	1	2084	2062	2100	1	25.3976	0.221506	45	2077	0.51	2079	0.19
1138	r1i1p3_GISS–E2–H_RCP4.5_057.final.csv	[1861.0, 1863, 1882, 1891, 1910, 1928, 1971, 1994, 2001, 2013, 2022, 2035, 2047, 2059, 2068, 2084, 2100.0]	43	110	6	r1i1p3	GISS–E2–H	RCP4.5	1	1863	1861	1882	100	10.6484	0.156765	100	1863	1	0	0
1139	r1i1p3_GISS–E2–H_RCP4.5_057.final.csv	[1861.0, 1863, 1882, 1891, 1910, 1928, 1971, 1994, 2001, 2013, 2022, 2035, 2047, 2059, 2068, 2084, 2100.0]	43	110	6	r1i1p3	GISS–E2–H	RCP4.5	1	1882	1863	1891	100	22.0211	–0.345029965988	100	1882	0.96	1883	0.04
1140	r1i1p3_GISS–E2–H_RCP4.5_057.final.csv	[1861.0, 1863, 1882, 1891, 1910, 1928, 1971, 1994, 2001, 2013, 2022, 2035, 2047, 2059, 2068, 2084, 2100.0]	43	110	6	r1i1p3	GISS–E2–H	RCP4.5	1	1891	1882	1910	5	16.1065	0.247443	100	1891	0.95	1892	0.04
1141	r1i1p3_GISS–E2–H_RCP4.5_057.final.csv	[1861.0, 1863, 1882, 1891, 1910, 1928, 1971, 1994, 2001, 2013, 2022, 2035, 2047, 2059, 2068, 2084, 2100.0]	43	110	6	r1i1p3	GISS–E2–H	RCP4.5	1	1910	1891	1928	5	21.1315	0.209173	5	1910	0.8	1914	0.06
1142	r1i1p3_GISS–E2–H_RCP4.5_057.final.csv	[1861.0, 1863, 1882, 1891, 1910, 1928, 1971, 1994, 2001, 2013, 2022, 2035, 2047, 2059, 2068, 2084, 2100.0]	43	110	6	r1i1p3	GISS–E2–H	RCP4.5	1	1928	1910	1971	5	33.1349	0.188853	5	1928	0.94	1929	0.05
1143	r1i1p3_GISS–E2–H_RCP4.5_057.final.csv	[1861.0, 1863, 1882, 1891, 1910, 1928, 1971, 1994, 2001, 2013, 2022, 2035, 2047, 2059, 2068, 2084, 2100.0]	43	110	6	r1i1p3	GISS–E2–H	RCP4.5	1	1971	1928	1994	5	35.4962	0.190477	100	1971	1	0	0
1144	r1i1p3_GISS–E2–H_RCP4.5_057.final.csv	[1861.0, 1863, 1882, 1891, 1910, 1928, 1971, 1994, 2001, 2013, 2022, 2035, 2047, 2059, 2068, 2084, 2100.0]	43	110	6	r1i1p3	GISS–E2–H	RCP4.5	1	1994	1971	2001	100	18.2397	0.293802	100	1994	0.74	1996	0.12
1145	r1i1p3_GISS–E2–H_RCP4.5_057.final.csv	[1861.0, 1863, 1882, 1891, 1910, 1928, 1971, 1994, 2001, 2013, 2022, 2035, 2047, 2059, 2068, 2084, 2100.0]	43	110	6	r1i1p3	GISS–E2–H	RCP4.5	1	2001	1994	2013	100	14.2561	0.296847	100	2001	0.95	2000	0.04
1146	r1i1p3_GISS–E2–H_RCP4.5_057.final.csv	[1861.0, 1863, 1882, 1891, 1910, 1928, 1971, 1994, 2001, 2013, 2022, 2035, 2047, 2059, 2068, 2084, 2100.0]	43	110	6	r1i1p3	GISS–E2–H	RCP4.5	1	2013	2001	2022	100	15.82	0.212709	100	2013	0.97	2010	0.03
1147	r1i1p3_GISS–E2–H_RCP4.5_057.final.csv	[1861.0, 1863, 1882, 1891, 1910, 1928, 1971, 1994, 2001, 2013, 2022, 2035, 2047, 2059, 2068, 2084, 2100.0]	43	110	6	r1i1p3	GISS–E2–H	RCP4.5	1	2022	2013	2035	98	16.0985	0.25094	100	2022	0.79	2025	0.18
1148	r1i1p3_GISS–E2–H_RCP4.5_057.final.csv	[1861.0, 1863, 1882, 1891, 1910, 1928, 1971, 1994, 2001, 2013, 2022, 2035, 2047, 2059, 2068, 2084, 2100.0]	43	110	6	r1i1p3	GISS–E2–H	RCP4.5	1	2035	2022	2047	98	19.72	0.343893	98	2035	0.79	2034	0.15
1149	r1i1p3_GISS–E2–H_RCP4.5_057.final.csv	[1861.0, 1863, 1882, 1891, 1910, 1928, 1971, 1994, 2001, 2013, 2022, 2035, 2047, 2059, 2068, 2084, 2100.0]	43	110	6	r1i1p3	GISS–E2–H	RCP4.5	1	2047	2035	2059	42	18.4016	0.280701	98	2047	0.92	2048	0.05
1150	r1i1p3_GISS–E2–H_RCP4.5_057.final.csv	[1861.0, 1863, 1882, 1891, 1910, 1928, 1971, 1994, 2001, 2013, 2022, 2035, 2047, 2059, 2068, 2084, 2100.0]	43	110	6	r1i1p3	GISS–E2–H	RCP4.5	1	2059	2047	2068	6	12.5342	0.181151	42	2059	0.8	2062	0.08
1151	r1i1p3_GISS–E2–H_RCP4.5_057.final.csv	[1861.0, 1863, 1882, 1891, 1910, 1928, 1971, 1994, 2001, 2013, 2022, 2035, 2047, 2059, 2068, 2084, 2100.0]	43	110	6	r1i1p3	GISS–E2–H	RCP4.5	1	2068	2059	2084	6	14.9457	0.176761	6	2068	0.81	2069	0.13
1152	r1i1p3_GISS–E2–H_RCP4.5_057.final.csv	[1861.0, 1863, 1882, 1891, 1910, 1928, 1971, 1994, 2001, 2013, 2022, 2035, 2047, 2059, 2068, 2084, 2100.0]	43	110	6	r1i1p3	GISS–E2–H	RCP4.5	1	2084	2068	2100	6	21.9314	0.176664	45	2084	0.85	2083	0.08
1153	r1i1p3_GISS–E2–H_RCP4.5_057.final.csv	[1861.0, 1863, 1882, 1891, 1917, 1935, 1971, 1994, 2001, 2013, 2022, 2035, 2047, 2059, 2068, 2084, 2100.0]	43	111	7	r1i1p3	GISS–E2–H	RCP4.5	5	1863	1861	1882	100	10.6484	0.156765	100	1863	1	0	0
1154	r1i1p3_GISS–E2–H_RCP4.5_057.final.csv	[1861.0, 1863, 1882, 1891, 1917, 1935, 1971, 1994, 2001, 2013, 2022, 2035, 2047, 2059, 2068, 2084, 2100.0]	43	111	7	r1i1p3	GISS–E2–H	RCP4.5	5	1882	1863	1891	100	22.0211	–0.345029965988	100	1882	0.96	1883	0.04
1155	r1i1p3_GISS–E2–H_RCP4.5_057.final.csv	[1861.0, 1863, 1882, 1891, 1917, 1935, 1971, 1994, 2001, 2013, 2022, 2035, 2047, 2059, 2068, 2084, 2100.0]	43	111	7	r1i1p3	GISS–E2–H	RCP4.5	5	1891	1882	1917	95	20.5252	0.283465	100	1891	0.72	1892	0.27
1156	r1i1p3_GISS–E2–H_RCP4.5_057.final.csv	[1861.0, 1863, 1882, 1891, 1917, 1935, 1971, 1994, 2001, 2013, 2022, 2035, 2047, 2059, 2068, 2084, 2100.0]	43	111	7	r1i1p3	GISS–E2–H	RCP4.5	5	1917	1891	1935	95	27.93	0.251555	95	1917	0.91	1913	0.03
1157	r1i1p3_GISS–E2–H_RCP4.5_057.final.csv	[1861.0, 1863, 1882, 1891, 1917, 1935, 1971, 1994, 2001, 2013, 2022, 2035, 2047, 2059, 2068, 2084, 2100.0]	43	111	7	r1i1p3	GISS–E2–H	RCP4.5	5	1935	1917	1971	95	21.8018	0.124879	95	1935	0.97	1929	0.02
1158	r1i1p3_GISS–E2–H_RCP4.5_057.final.csv	[1861.0, 1863, 1882, 1891, 1917, 1935, 1971, 1994, 2001, 2013, 2022, 2035, 2047, 2059, 2068, 2084, 2100.0]	43	111	7	r1i1p3	GISS–E2–H	RCP4.5	5	1971	1935	1994	95	31.3033	0.177414	100	1971	1	0	0
1159	r1i1p3_GISS–E2–H_RCP4.5_057.final.csv	[1861.0, 1863, 1882, 1891, 1917, 1935, 1971, 1994, 2001, 2013, 2022, 2035, 2047, 2059, 2068, 2084, 2100.0]	43	111	7	r1i1p3	GISS–E2–H	RCP4.5	5	1994	1971	2001	100	18.2397	0.293802	100	1994	0.74	1996	0.12
1160	r1i1p3_GISS–E2–H_RCP4.5_057.final.csv	[1861.0, 1863, 1882, 1891, 1917, 1935, 1971, 1994, 2001, 2013, 2022, 2035, 2047, 2059, 2068, 2084, 2100.0]	43	111	7	r1i1p3	GISS–E2–H	RCP4.5	5	2001	1994	2013	100	14.2561	0.296847	100	2001	0.95	2000	0.04
1161	r1i1p3_GISS–E2–H_RCP4.5_057.final.csv	[1861.0, 1863, 1882, 1891, 1917, 1935, 1971, 1994, 2001, 2013, 2022, 2035, 2047, 2059, 2068, 2084, 2100.0]	43	111	7	r1i1p3	GISS–E2–H	RCP4.5	5	2013	2001	2022	100	15.82	0.212709	100	2013	0.97	2010	0.03
1162	r1i1p3_GISS–E2–H_RCP4.5_057.final.csv	[1861.0, 1863, 1882, 1891, 1917, 1935, 1971, 1994, 2001, 2013, 2022, 2035, 2047, 2059, 2068, 2084, 2100.0]	43	111	7	r1i1p3	GISS–E2–H	RCP4.5	5	2022	2013	2035	98	16.0985	0.25094	100	2022	0.79	2025	0.18
1163	r1i1p3_GISS–E2–H_RCP4.5_057.final.csv	[1861.0, 1863, 1882, 1891, 1917, 1935, 1971, 1994, 2001, 2013, 2022, 2035, 2047, 2059, 2068, 2084, 2100.0]	43	111	7	r1i1p3	GISS–E2–H	RCP4.5	5	2035	2022	2047	98	19.72	0.343893	98	2035	0.79	2034	0.15
1164	r1i1p3_GISS–E2–H_RCP4.5_057.final.csv	[1861.0, 1863, 1882, 1891, 1917, 1935, 1971, 1994, 2001, 2013, 2022, 2035, 2047, 2059, 2068, 2084, 2100.0]	43	111	7	r1i1p3	GISS–E2–H	RCP4.5	5	2047	2035	2059	42	18.4016	0.280701	98	2047	0.92	2048	0.05
1165	r1i1p3_GISS–E2–H_RCP4.5_057.final.csv	[1861.0, 1863, 1882, 1891, 1917, 1935, 1971, 1994, 2001, 2013, 2022, 2035, 2047, 2059, 2068, 2084, 2100.0]	43	111	7	r1i1p3	GISS–E2–H	RCP4.5	5	2059	2047	2068	6	12.5342	0.181151	42	2059	0.8	2062	0.08
1166	r1i1p3_GISS–E2–H_RCP4.5_057.final.csv	[1861.0, 1863, 1882, 1891, 1917, 1935, 1971, 1994, 2001, 2013, 2022, 2035, 2047, 2059, 2068, 2084, 2100.0]	43	111	7	r1i1p3	GISS–E2–H	RCP4.5	5	2068	2059	2084	6	14.9457	0.176761	6	2068	0.81	2069	0.13
1167	r1i1p3_GISS–E2–H_RCP4.5_057.final.csv	[1861.0, 1863, 1882, 1891, 1917, 1935, 1971, 1994, 2001, 2013, 2022, 2035, 2047, 2059, 2068, 2084, 2100.0]	43	111	7	r1i1p3	GISS–E2–H	RCP4.5	5	2084	2068	2100	6	21.9314	0.176664	45	2084	0.85	2083	0.08
1168	r1i1p3_GISS–E2–H_RCP4.5_057.final.csv	[1861.0, 1863, 1882, 1891, 1917, 1935, 1971, 1994, 2001, 2013, 2022, 2035, 2047, 2063, 2082, 2100.0]	43	112	8	r1i1p3	GISS–E2–H	RCP4.5	6	1863	1861	1882	100	10.6484	0.156765	100	1863	1	0	0
1169	r1i1p3_GISS–E2–H_RCP4.5_057.final.csv	[1861.0, 1863, 1882, 1891, 1917, 1935, 1971, 1994, 2001, 2013, 2022, 2035, 2047, 2063, 2082, 2100.0]	43	112	8	r1i1p3	GISS–E2–H	RCP4.5	6	1882	1863	1891	100	22.0211	–0.345029965988	100	1882	0.96	1883	0.04
1170	r1i1p3_GISS–E2–H_RCP4.5_057.final.csv	[1861.0, 1863, 1882, 1891, 1917, 1935, 1971, 1994, 2001, 2013, 2022, 2035, 2047, 2063, 2082, 2100.0]	43	112	8	r1i1p3	GISS–E2–H	RCP4.5	6	1891	1882	1917	95	20.5252	0.283465	100	1891	0.72	1892	0.27
1171	r1i1p3_GISS–E2–H_RCP4.5_057.final.csv	[1861.0, 1863, 1882, 1891, 1917, 1935, 1971, 1994, 2001, 2013, 2022, 2035, 2047, 2063, 2082, 2100.0]	43	112	8	r1i1p3	GISS–E2–H	RCP4.5	6	1917	1891	1935	95	27.93	0.251555	95	1917	0.91	1913	0.03
1172	r1i1p3_GISS–E2–H_RCP4.5_057.final.csv	[1861.0, 1863, 1882, 1891, 1917, 1935, 1971, 1994, 2001, 2013, 2022, 2035, 2047, 2063, 2082, 2100.0]	43	112	8	r1i1p3	GISS–E2–H	RCP4.5	6	1935	1917	1971	95	21.8018	0.124879	95	1935	0.97	1929	0.02
1173	r1i1p3_GISS–E2–H_RCP4.5_057.final.csv	[1861.0, 1863, 1882, 1891, 1917, 1935, 1971, 1994, 2001, 2013, 2022, 2035, 2047, 2063, 2082, 2100.0]	43	112	8	r1i1p3	GISS–E2–H	RCP4.5	6	1971	1935	1994	95	31.3033	0.177414	100	1971	1	0	0
1174	r1i1p3_GISS–E2–H_RCP4.5_057.final.csv	[1861.0, 1863, 1882, 1891, 1917, 1935, 1971, 1994, 2001, 2013, 2022, 2035, 2047, 2063, 2082, 2100.0]	43	112	8	r1i1p3	GISS–E2–H	RCP4.5	6	1994	1971	2001	100	18.2397	0.293802	100	1994	0.74	1996	0.12
1175	r1i1p3_GISS–E2–H_RCP4.5_057.final.csv	[1861.0, 1863, 1882, 1891, 1917, 1935, 1971, 1994, 2001, 2013, 2022, 2035, 2047, 2063, 2082, 2100.0]	43	112	8	r1i1p3	GISS–E2–H	RCP4.5	6	2001	1994	2013	100	14.2561	0.296847	100	2001	0.95	2000	0.04
1176	r1i1p3_GISS–E2–H_RCP4.5_057.final.csv	[1861.0, 1863, 1882, 1891, 1917, 1935, 1971, 1994, 2001, 2013, 2022, 2035, 2047, 2063, 2082, 2100.0]	43	112	8	r1i1p3	GISS–E2–H	RCP4.5	6	2013	2001	2022	100	15.82	0.212709	100	2013	0.97	2010	0.03
1177	r1i1p3_GISS–E2–H_RCP4.5_057.final.csv	[1861.0, 1863, 1882, 1891, 1917, 1935, 1971, 1994, 2001, 2013, 2022, 2035, 2047, 2063, 2082, 2100.0]	43	112	8	r1i1p3	GISS–E2–H	RCP4.5	6	2022	2013	2035	98	16.0985	0.25094	100	2022	0.79	2025	0.18
1178	r1i1p3_GISS–E2–H_RCP4.5_057.final.csv	[1861.0, 1863, 1882, 1891, 1917, 1935, 1971, 1994, 2001, 2013, 2022, 2035, 2047, 2063, 2082, 2100.0]	43	112	8	r1i1p3	GISS–E2–H	RCP4.5	6	2035	2022	2047	98	19.72	0.343893	98	2035	0.79	2034	0.15
1179	r1i1p3_GISS–E2–H_RCP4.5_057.final.csv	[1861.0, 1863, 1882, 1891, 1917, 1935, 1971, 1994, 2001, 2013, 2022, 2035, 2047, 2063, 2082, 2100.0]	43	112	8	r1i1p3	GISS–E2–H	RCP4.5	6	2047	2035	2063	55	21.3428	0.312795	98	2047	0.48	2048	0.47
1180	r1i1p3_GISS–E2–H_RCP4.5_057.final.csv	[1861.0, 1863, 1882, 1891, 1917, 1935, 1971, 1994, 2001, 2013, 2022, 2035, 2047, 2063, 2082, 2100.0]	43	112	8	r1i1p3	GISS–E2–H	RCP4.5	6	2063	2047	2082	6	25.7982	0.283671	55	2063	0.86	2062	0.12
1181	r1i1p3_GISS–E2–H_RCP4.5_057.final.csv	[1861.0, 1863, 1882, 1891, 1917, 1935, 1971, 1994, 2001, 2013, 2022, 2035, 2047, 2063, 2082, 2100.0]	43	112	8	r1i1p3	GISS–E2–H	RCP4.5	6	2082	2063	2100	6	24.7184	0.20899	6	2082	0.52	2083	0.18
1182	r1i1p3_GISS–E2–H_RCP4.5_057.final.csv	[1861.0, 1863, 1882, 1891, 1917, 1935, 1971, 1994, 2001, 2013, 2022, 2035, 2047, 2062, 2069, 2084, 2100.0]	43	113	9	r1i1p3	GISS–E2–H	RCP4.5	1	1863	1861	1882	100	10.6484	0.156765	100	1863	1	0	0
1183	r1i1p3_GISS–E2–H_RCP4.5_057.final.csv	[1861.0, 1863, 1882, 1891, 1917, 1935, 1971, 1994, 2001, 2013, 2022, 2035, 2047, 2062, 2069, 2084, 2100.0]	43	113	9	r1i1p3	GISS–E2–H	RCP4.5	1	1882	1863	1891	100	22.0211	–0.345029965988	100	1882	0.96	1883	0.04
1184	r1i1p3_GISS–E2–H_RCP4.5_057.final.csv	[1861.0, 1863, 1882, 1891, 1917, 1935, 1971, 1994, 2001, 2013, 2022, 2035, 2047, 2062, 2069, 2084, 2100.0]	43	113	9	r1i1p3	GISS–E2–H	RCP4.5	1	1891	1882	1917	95	20.5252	0.283465	100	1891	0.72	1892	0.27
1185	r1i1p3_GISS–E2–H_RCP4.5_057.final.csv	[1861.0, 1863, 1882, 1891, 1917, 1935, 1971, 1994, 2001, 2013, 2022, 2035, 2047, 2062, 2069, 2084, 2100.0]	43	113	9	r1i1p3	GISS–E2–H	RCP4.5	1	1917	1891	1935	95	27.93	0.251555	95	1917	0.91	1913	0.03
1186	r1i1p3_GISS–E2–H_RCP4.5_057.final.csv	[1861.0, 1863, 1882, 1891, 1917, 1935, 1971, 1994, 2001, 2013, 2022, 2035, 2047, 2062, 2069, 2084, 2100.0]	43	113	9	r1i1p3	GISS–E2–H	RCP4.5	1	1935	1917	1971	95	21.8018	0.124879	95	1935	0.97	1929	0.02
1187	r1i1p3_GISS–E2–H_RCP4.5_057.final.csv	[1861.0, 1863, 1882, 1891, 1917, 1935, 1971, 1994, 2001, 2013, 2022, 2035, 2047, 2062, 2069, 2084, 2100.0]	43	113	9	r1i1p3	GISS–E2–H	RCP4.5	1	1971	1935	1994	95	31.3033	0.177414	100	1971	1	0	0
1188	r1i1p3_GISS–E2–H_RCP4.5_057.final.csv	[1861.0, 1863, 1882, 1891, 1917, 1935, 1971, 1994, 2001, 2013, 2022, 2035, 2047, 2062, 2069, 2084, 2100.0]	43	113	9	r1i1p3	GISS–E2–H	RCP4.5	1	1994	1971	2001	100	18.2397	0.293802	100	1994	0.74	1996	0.12
1189	r1i1p3_GISS–E2–H_RCP4.5_057.final.csv	[1861.0, 1863, 1882, 1891, 1917, 1935, 1971, 1994, 2001, 2013, 2022, 2035, 2047, 2062, 2069, 2084, 2100.0]	43	113	9	r1i1p3	GISS–E2–H	RCP4.5	1	2001	1994	2013	100	14.2561	0.296847	100	2001	0.95	2000	0.04
1190	r1i1p3_GISS–E2–H_RCP4.5_057.final.csv	[1861.0, 1863, 1882, 1891, 1917, 1935, 1971, 1994, 2001, 2013, 2022, 2035, 2047, 2062, 2069, 2084, 2100.0]	43	113	9	r1i1p3	GISS–E2–H	RCP4.5	1	2013	2001	2022	100	15.82	0.212709	100	2013	0.97	2010	0.03
1191	r1i1p3_GISS–E2–H_RCP4.5_057.final.csv	[1861.0, 1863, 1882, 1891, 1917, 1935, 1971, 1994, 2001, 2013, 2022, 2035, 2047, 2062, 2069, 2084, 2100.0]	43	113	9	r1i1p3	GISS–E2–H	RCP4.5	1	2022	2013	2035	98	16.0985	0.25094	100	2022	0.79	2025	0.18
1192	r1i1p3_GISS–E2–H_RCP4.5_057.final.csv	[1861.0, 1863, 1882, 1891, 1917, 1935, 1971, 1994, 2001, 2013, 2022, 2035, 2047, 2062, 2069, 2084, 2100.0]	43	113	9	r1i1p3	GISS–E2–H	RCP4.5	1	2035	2022	2047	98	19.72	0.343893	98	2035	0.79	2034	0.15
1193	r1i1p3_GISS–E2–H_RCP4.5_057.final.csv	[1861.0, 1863, 1882, 1891, 1917, 1935, 1971, 1994, 2001, 2013, 2022, 2035, 2047, 2062, 2069, 2084, 2100.0]	43	113	9	r1i1p3	GISS–E2–H	RCP4.5	1	2047	2035	2062	1	20.4495	0.304072	98	2047	0.73	2048	0.22
1194	r1i1p3_GISS–E2–H_RCP4.5_057.final.csv	[1861.0, 1863, 1882, 1891, 1917, 1935, 1971, 1994, 2001, 2013, 2022, 2035, 2047, 2062, 2069, 2084, 2100.0]	43	113	9	r1i1p3	GISS–E2–H	RCP4.5	1	2062	2047	2069	1	13.5868	0.192983	3	2059	0.74	2062	0.14
1195	r1i1p3_GISS–E2–H_RCP4.5_057.final.csv	[1861.0, 1863, 1882, 1891, 1917, 1935, 1971, 1994, 2001, 2013, 2022, 2035, 2047, 2062, 2069, 2084, 2100.0]	43	113	9	r1i1p3	GISS–E2–H	RCP4.5	1	2069	2062	2084	2	11.996	0.141242	5	2069	0.57	2068	0.27
1196	r1i1p3_GISS–E2–H_RCP4.5_057.final.csv	[1861.0, 1863, 1882, 1891, 1917, 1935, 1971, 1994, 2001, 2013, 2022, 2035, 2047, 2062, 2069, 2084, 2100.0]	43	113	9	r1i1p3	GISS–E2–H	RCP4.5	1	2084	2069	2100	5	20.9417	0.172006	45	2084	0.86	2083	0.09
1197	r1i1p3_GISS–E2–H_RCP4.5_057.final.csv	[1861.0, 1863, 1882, 1891, 1917, 1935, 1971, 1994, 2001, 2013, 2022, 2035, 2047, 2059, 2066, 2084, 2100.0]	43	114	10	r1i1p3	GISS–E2–H	RCP4.5	3	1863	1861	1882	100	10.6484	0.156765	100	1863	1	0	0
1198	r1i1p3_GISS–E2–H_RCP4.5_057.final.csv	[1861.0, 1863, 1882, 1891, 1917, 1935, 1971, 1994, 2001, 2013, 2022, 2035, 2047, 2059, 2066, 2084, 2100.0]	43	114	10	r1i1p3	GISS–E2–H	RCP4.5	3	1882	1863	1891	100	22.0211	–0.345029965988	100	1882	0.96	1883	0.04
1199	r1i1p3_GISS–E2–H_RCP4.5_057.final.csv	[1861.0, 1863, 1882, 1891, 1917, 1935, 1971, 1994, 2001, 2013, 2022, 2035, 2047, 2059, 2066, 2084, 2100.0]	43	114	10	r1i1p3	GISS–E2–H	RCP4.5	3	1891	1882	1917	95	20.5252	0.283465	100	1891	0.72	1892	0.27
1200	r1i1p3_GISS–E2–H_RCP4.5_057.final.csv	[1861.0, 1863, 1882, 1891, 1917, 1935, 1971, 1994, 2001, 2013, 2022, 2035, 2047, 2059, 2066, 2084, 2100.0]	43	114	10	r1i1p3	GISS–E2–H	RCP4.5	3	1917	1891	1935	95	27.93	0.251555	95	1917	0.91	1913	0.03
1201	r1i1p3_GISS–E2–H_RCP4.5_057.final.csv	[1861.0, 1863, 1882, 1891, 1917, 1935, 1971, 1994, 2001, 2013, 2022, 2035, 2047, 2059, 2066, 2084, 2100.0]	43	114	10	r1i1p3	GISS–E2–H	RCP4.5	3	1935	1917	1971	95	21.8018	0.124879	95	1935	0.97	1929	0.02
1202	r1i1p3_GISS–E2–H_RCP4.5_057.final.csv	[1861.0, 1863, 1882, 1891, 1917, 1935, 1971, 1994, 2001, 2013, 2022, 2035, 2047, 2059, 2066, 2084, 2100.0]	43	114	10	r1i1p3	GISS–E2–H	RCP4.5	3	1971	1935	1994	95	31.3033	0.177414	100	1971	1	0	0
1203	r1i1p3_GISS–E2–H_RCP4.5_057.final.csv	[1861.0, 1863, 1882, 1891, 1917, 1935, 1971, 1994, 2001, 2013, 2022, 2035, 2047, 2059, 2066, 2084, 2100.0]	43	114	10	r1i1p3	GISS–E2–H	RCP4.5	3	1994	1971	2001	100	18.2397	0.293802	100	1994	0.74	1996	0.12
1204	r1i1p3_GISS–E2–H_RCP4.5_057.final.csv	[1861.0, 1863, 1882, 1891, 1917, 1935, 1971, 1994, 2001, 2013, 2022, 2035, 2047, 2059, 2066, 2084, 2100.0]	43	114	10	r1i1p3	GISS–E2–H	RCP4.5	3	2001	1994	2013	100	14.2561	0.296847	100	2001	0.95	2000	0.04
1205	r1i1p3_GISS–E2–H_RCP4.5_057.final.csv	[1861.0, 1863, 1882, 1891, 1917, 1935, 1971, 1994, 2001, 2013, 2022, 2035, 2047, 2059, 2066, 2084, 2100.0]	43	114	10	r1i1p3	GISS–E2–H	RCP4.5	3	2013	2001	2022	100	15.82	0.212709	100	2013	0.97	2010	0.03
1206	r1i1p3_GISS–E2–H_RCP4.5_057.final.csv	[1861.0, 1863, 1882, 1891, 1917, 1935, 1971, 1994, 2001, 2013, 2022, 2035, 2047, 2059, 2066, 2084, 2100.0]	43	114	10	r1i1p3	GISS–E2–H	RCP4.5	3	2022	2013	2035	98	16.0985	0.25094	100	2022	0.79	2025	0.18
1207	r1i1p3_GISS–E2–H_RCP4.5_057.final.csv	[1861.0, 1863, 1882, 1891, 1917, 1935, 1971, 1994, 2001, 2013, 2022, 2035, 2047, 2059, 2066, 2084, 2100.0]	43	114	10	r1i1p3	GISS–E2–H	RCP4.5	3	2035	2022	2047	98	19.72	0.343893	98	2035	0.79	2034	0.15
1208	r1i1p3_GISS–E2–H_RCP4.5_057.final.csv	[1861.0, 1863, 1882, 1891, 1917, 1935, 1971, 1994, 2001, 2013, 2022, 2035, 2047, 2059, 2066, 2084, 2100.0]	43	114	10	r1i1p3	GISS–E2–H	RCP4.5	3	2047	2035	2059	42	18.4016	0.280701	98	2047	0.92	2048	0.05
1209	r1i1p3_GISS–E2–H_RCP4.5_057.final.csv	[1861.0, 1863, 1882, 1891, 1917, 1935, 1971, 1994, 2001, 2013, 2022, 2035, 2047, 2059, 2066, 2084, 2100.0]	43	114	10	r1i1p3	GISS–E2–H	RCP4.5	3	2059	2047	2066	33	10.3751	0.163158	42	2059	0.63	2054	0.16
1210	r1i1p3_GISS–E2–H_RCP4.5_057.final.csv	[1861.0, 1863, 1882, 1891, 1917, 1935, 1971, 1994, 2001, 2013, 2022, 2035, 2047, 2059, 2066, 2084, 2100.0]	43	114	10	r1i1p3	GISS–E2–H	RCP4.5	3	2066	2059	2084	3	14.9457	0.176761	33	2068	0.81	2069	0.13
1211	r1i1p3_GISS–E2–H_RCP4.5_057.final.csv	[1861.0, 1863, 1882, 1891, 1917, 1935, 1971, 1994, 2001, 2013, 2022, 2035, 2047, 2059, 2066, 2084, 2100.0]	43	114	10	r1i1p3	GISS–E2–H	RCP4.5	3	2084	2066	2100	3	23.2518	0.189284	45	2084	0.6	2083	0.27
1212	r1i1p3_GISS–E2–H_RCP4.5_057.final.csv	[1861.0, 1863, 1882, 1891, 1910, 1928, 1971, 1994, 2001, 2013, 2022, 2035, 2047, 2063, 2100.0]	43	115	11	r1i1p3	GISS–E2–H	RCP4.5	1	1863	1861	1882	100	10.6484	0.156765	100	1863	1	0	0
1213	r1i1p3_GISS–E2–H_RCP4.5_057.final.csv	[1861.0, 1863, 1882, 1891, 1910, 1928, 1971, 1994, 2001, 2013, 2022, 2035, 2047, 2063, 2100.0]	43	115	11	r1i1p3	GISS–E2–H	RCP4.5	1	1882	1863	1891	100	22.0211	–0.345029965988	100	1882	0.96	1883	0.04
1214	r1i1p3_GISS–E2–H_RCP4.5_057.final.csv	[1861.0, 1863, 1882, 1891, 1910, 1928, 1971, 1994, 2001, 2013, 2022, 2035, 2047, 2063, 2100.0]	43	115	11	r1i1p3	GISS–E2–H	RCP4.5	1	1891	1882	1910	5	16.1065	0.247443	100	1891	0.95	1892	0.04
1215	r1i1p3_GISS–E2–H_RCP4.5_057.final.csv	[1861.0, 1863, 1882, 1891, 1910, 1928, 1971, 1994, 2001, 2013, 2022, 2035, 2047, 2063, 2100.0]	43	115	11	r1i1p3	GISS–E2–H	RCP4.5	1	1910	1891	1928	5	21.1315	0.209173	5	1910	0.8	1914	0.06
1216	r1i1p3_GISS–E2–H_RCP4.5_057.final.csv	[1861.0, 1863, 1882, 1891, 1910, 1928, 1971, 1994, 2001, 2013, 2022, 2035, 2047, 2063, 2100.0]	43	115	11	r1i1p3	GISS–E2–H	RCP4.5	1	1928	1910	1971	5	33.1349	0.188853	5	1928	0.94	1929	0.05
1217	r1i1p3_GISS–E2–H_RCP4.5_057.final.csv	[1861.0, 1863, 1882, 1891, 1910, 1928, 1971, 1994, 2001, 2013, 2022, 2035, 2047, 2063, 2100.0]	43	115	11	r1i1p3	GISS–E2–H	RCP4.5	1	1971	1928	1994	5	35.4962	0.190477	100	1971	1	0	0
1218	r1i1p3_GISS–E2–H_RCP4.5_057.final.csv	[1861.0, 1863, 1882, 1891, 1910, 1928, 1971, 1994, 2001, 2013, 2022, 2035, 2047, 2063, 2100.0]	43	115	11	r1i1p3	GISS–E2–H	RCP4.5	1	1994	1971	2001	100	18.2397	0.293802	100	1994	0.74	1996	0.12
1219	r1i1p3_GISS–E2–H_RCP4.5_057.final.csv	[1861.0, 1863, 1882, 1891, 1910, 1928, 1971, 1994, 2001, 2013, 2022, 2035, 2047, 2063, 2100.0]	43	115	11	r1i1p3	GISS–E2–H	RCP4.5	1	2001	1994	2013	100	14.2561	0.296847	100	2001	0.95	2000	0.04
1220	r1i1p3_GISS–E2–H_RCP4.5_057.final.csv	[1861.0, 1863, 1882, 1891, 1910, 1928, 1971, 1994, 2001, 2013, 2022, 2035, 2047, 2063, 2100.0]	43	115	11	r1i1p3	GISS–E2–H	RCP4.5	1	2013	2001	2022	100	15.82	0.212709	100	2013	0.97	2010	0.03
1221	r1i1p3_GISS–E2–H_RCP4.5_057.final.csv	[1861.0, 1863, 1882, 1891, 1910, 1928, 1971, 1994, 2001, 2013, 2022, 2035, 2047, 2063, 2100.0]	43	115	11	r1i1p3	GISS–E2–H	RCP4.5	1	2022	2013	2035	98	16.0985	0.25094	100	2022	0.79	2025	0.18
1222	r1i1p3_GISS–E2–H_RCP4.5_057.final.csv	[1861.0, 1863, 1882, 1891, 1910, 1928, 1971, 1994, 2001, 2013, 2022, 2035, 2047, 2063, 2100.0]	43	115	11	r1i1p3	GISS–E2–H	RCP4.5	1	2035	2022	2047	98	19.72	0.343893	98	2035	0.79	2034	0.15
1223	r1i1p3_GISS–E2–H_RCP4.5_057.final.csv	[1861.0, 1863, 1882, 1891, 1910, 1928, 1971, 1994, 2001, 2013, 2022, 2035, 2047, 2063, 2100.0]	43	115	11	r1i1p3	GISS–E2–H	RCP4.5	1	2047	2035	2063	55	21.3428	0.312795	98	2047	0.48	2048	0.47
1224	r1i1p3_GISS–E2–H_RCP4.5_057.final.csv	[1861.0, 1863, 1882, 1891, 1910, 1928, 1971, 1994, 2001, 2013, 2022, 2035, 2047, 2063, 2100.0]	43	115	11	r1i1p3	GISS–E2–H	RCP4.5	1	2063	2047	2100	49	38.2215	0.368502	55	2068	0.74	2066	0.15
1225	r1i1p3_GISS–E2–H_RCP4.5_057.final.csv	[1861.0, 1863, 1882, 1891, 1917, 1935, 1971, 1994, 2001, 2013, 2022, 2035, 2047, 2059, 2066, 2077, 2084, 2100.0]	43	116	12	r1i1p3	GISS–E2–H	RCP4.5	27	1863	1861	1882	100	10.6484	0.156765	100	1863	1	0	0
1226	r1i1p3_GISS–E2–H_RCP4.5_057.final.csv	[1861.0, 1863, 1882, 1891, 1917, 1935, 1971, 1994, 2001, 2013, 2022, 2035, 2047, 2059, 2066, 2077, 2084, 2100.0]	43	116	12	r1i1p3	GISS–E2–H	RCP4.5	27	1882	1863	1891	100	22.0211	–0.345029965988	100	1882	0.96	1883	0.04
1227	r1i1p3_GISS–E2–H_RCP4.5_057.final.csv	[1861.0, 1863, 1882, 1891, 1917, 1935, 1971, 1994, 2001, 2013, 2022, 2035, 2047, 2059, 2066, 2077, 2084, 2100.0]	43	116	12	r1i1p3	GISS–E2–H	RCP4.5	27	1891	1882	1917	95	20.5252	0.283465	100	1891	0.72	1892	0.27
1228	r1i1p3_GISS–E2–H_RCP4.5_057.final.csv	[1861.0, 1863, 1882, 1891, 1917, 1935, 1971, 1994, 2001, 2013, 2022, 2035, 2047, 2059, 2066, 2077, 2084, 2100.0]	43	116	12	r1i1p3	GISS–E2–H	RCP4.5	27	1917	1891	1935	95	27.93	0.251555	95	1917	0.91	1913	0.03
1229	r1i1p3_GISS–E2–H_RCP4.5_057.final.csv	[1861.0, 1863, 1882, 1891, 1917, 1935, 1971, 1994, 2001, 2013, 2022, 2035, 2047, 2059, 2066, 2077, 2084, 2100.0]	43	116	12	r1i1p3	GISS–E2–H	RCP4.5	27	1935	1917	1971	95	21.8018	0.124879	95	1935	0.97	1929	0.02
1230	r1i1p3_GISS–E2–H_RCP4.5_057.final.csv	[1861.0, 1863, 1882, 1891, 1917, 1935, 1971, 1994, 2001, 2013, 2022, 2035, 2047, 2059, 2066, 2077, 2084, 2100.0]	43	116	12	r1i1p3	GISS–E2–H	RCP4.5	27	1971	1935	1994	95	31.3033	0.177414	100	1971	1	0	0
1231	r1i1p3_GISS–E2–H_RCP4.5_057.final.csv	[1861.0, 1863, 1882, 1891, 1917, 1935, 1971, 1994, 2001, 2013, 2022, 2035, 2047, 2059, 2066, 2077, 2084, 2100.0]	43	116	12	r1i1p3	GISS–E2–H	RCP4.5	27	1994	1971	2001	100	18.2397	0.293802	100	1994	0.74	1996	0.12
1232	r1i1p3_GISS–E2–H_RCP4.5_057.final.csv	[1861.0, 1863, 1882, 1891, 1917, 1935, 1971, 1994, 2001, 2013, 2022, 2035, 2047, 2059, 2066, 2077, 2084, 2100.0]	43	116	12	r1i1p3	GISS–E2–H	RCP4.5	27	2001	1994	2013	100	14.2561	0.296847	100	2001	0.95	2000	0.04
1233	r1i1p3_GISS–E2–H_RCP4.5_057.final.csv	[1861.0, 1863, 1882, 1891, 1917, 1935, 1971, 1994, 2001, 2013, 2022, 2035, 2047, 2059, 2066, 2077, 2084, 2100.0]	43	116	12	r1i1p3	GISS–E2–H	RCP4.5	27	2013	2001	2022	100	15.82	0.212709	100	2013	0.97	2010	0.03
1234	r1i1p3_GISS–E2–H_RCP4.5_057.final.csv	[1861.0, 1863, 1882, 1891, 1917, 1935, 1971, 1994, 2001, 2013, 2022, 2035, 2047, 2059, 2066, 2077, 2084, 2100.0]	43	116	12	r1i1p3	GISS–E2–H	RCP4.5	27	2022	2013	2035	98	16.0985	0.25094	100	2022	0.79	2025	0.18
1235	r1i1p3_GISS–E2–H_RCP4.5_057.final.csv	[1861.0, 1863, 1882, 1891, 1917, 1935, 1971, 1994, 2001, 2013, 2022, 2035, 2047, 2059, 2066, 2077, 2084, 2100.0]	43	116	12	r1i1p3	GISS–E2–H	RCP4.5	27	2035	2022	2047	98	19.72	0.343893	98	2035	0.79	2034	0.15
1236	r1i1p3_GISS–E2–H_RCP4.5_057.final.csv	[1861.0, 1863, 1882, 1891, 1917, 1935, 1971, 1994, 2001, 2013, 2022, 2035, 2047, 2059, 2066, 2077, 2084, 2100.0]	43	116	12	r1i1p3	GISS–E2–H	RCP4.5	27	2047	2035	2059	42	18.4016	0.280701	98	2047	0.92	2048	0.05
1237	r1i1p3_GISS–E2–H_RCP4.5_057.final.csv	[1861.0, 1863, 1882, 1891, 1917, 1935, 1971, 1994, 2001, 2013, 2022, 2035, 2047, 2059, 2066, 2077, 2084, 2100.0]	43	116	12	r1i1p3	GISS–E2–H	RCP4.5	27	2059	2047	2066	33	10.3751	0.163158	42	2059	0.63	2054	0.16
1238	r1i1p3_GISS–E2–H_RCP4.5_057.final.csv	[1861.0, 1863, 1882, 1891, 1917, 1935, 1971, 1994, 2001, 2013, 2022, 2035, 2047, 2059, 2066, 2077, 2084, 2100.0]	43	116	12	r1i1p3	GISS–E2–H	RCP4.5	27	2066	2059	2077	30	9.69086	0.142988	33	2066	0.73	2068	0.19
1239	r1i1p3_GISS–E2–H_RCP4.5_057.final.csv	[1861.0, 1863, 1882, 1891, 1917, 1935, 1971, 1994, 2001, 2013, 2022, 2035, 2047, 2059, 2066, 2077, 2084, 2100.0]	43	116	12	r1i1p3	GISS–E2–H	RCP4.5	27	2077	2066	2084	30	11.1184	0.106117	30	2077	0.99	2076	0.01
1240	r1i1p3_GISS–E2–H_RCP4.5_057.final.csv	[1861.0, 1863, 1882, 1891, 1917, 1935, 1971, 1994, 2001, 2013, 2022, 2035, 2047, 2059, 2066, 2077, 2084, 2100.0]	43	116	12	r1i1p3	GISS–E2–H	RCP4.5	27	2084	2077	2100	30	12.5232	0.123614	45	2084	0.87	2093	0.08
Seq	Source	BreakSet	DatasetNo	SetNo	SetNoInData	Type	Model	Treat	%BreakSet	Year	Predecessor	Successor	%SegmentFound	Ti	Shift	%YearOverall	ModalYear	ModalValue	SecondModalYear	SecondModalValue
1241	r1i1p3_GISS–E2–R_RCP4.5_074.final.csv	[1861.0, 1907, 1930, 1976, 1998, 2013, 2027, 2045, 2057, 2084, 2100.0]	44	117	1	r1i1p3	GISS–E2–R	RCP4.5	100	1907	1861	1930	100	22.8496	0.159737	100	1907	0.87	1908	0.05
1242	r1i1p3_GISS–E2–R_RCP4.5_074.final.csv	[1861.0, 1907, 1930, 1976, 1998, 2013, 2027, 2045, 2057, 2084, 2100.0]	44	117	1	r1i1p3	GISS–E2–R	RCP4.5	100	1930	1907	1976	100	26.0411	0.114177	100	1930	0.98	1924	0.02
1243	r1i1p3_GISS–E2–R_RCP4.5_074.final.csv	[1861.0, 1907, 1930, 1976, 1998, 2013, 2027, 2045, 2057, 2084, 2100.0]	44	117	1	r1i1p3	GISS–E2–R	RCP4.5	100	1976	1930	1998	100	21.5443	0.145225	100	1976	0.59	1977	0.22
1244	r1i1p3_GISS–E2–R_RCP4.5_074.final.csv	[1861.0, 1907, 1930, 1976, 1998, 2013, 2027, 2045, 2057, 2084, 2100.0]	44	117	1	r1i1p3	GISS–E2–R	RCP4.5	100	1998	1976	2013	100	29.2163	0.530887	100	1998	0.89	1999	0.09
1245	r1i1p3_GISS–E2–R_RCP4.5_074.final.csv	[1861.0, 1907, 1930, 1976, 1998, 2013, 2027, 2045, 2057, 2084, 2100.0]	44	117	1	r1i1p3	GISS–E2–R	RCP4.5	100	2013	1998	2027	100	20.3081	0.274829	100	2013	0.93	2012	0.07
1246	r1i1p3_GISS–E2–R_RCP4.5_074.final.csv	[1861.0, 1907, 1930, 1976, 1998, 2013, 2027, 2045, 2057, 2084, 2100.0]	44	117	1	r1i1p3	GISS–E2–R	RCP4.5	100	2027	2013	2045	100	26.1611	0.348198	100	2027	0.88	2028	0.12
1247	r1i1p3_GISS–E2–R_RCP4.5_074.final.csv	[1861.0, 1907, 1930, 1976, 1998, 2013, 2027, 2045, 2057, 2084, 2100.0]	44	117	1	r1i1p3	GISS–E2–R	RCP4.5	100	2045	2027	2057	100	24.9384	0.333959	100	2045	0.88	2044	0.06
1248	r1i1p3_GISS–E2–R_RCP4.5_074.final.csv	[1861.0, 1907, 1930, 1976, 1998, 2013, 2027, 2045, 2057, 2084, 2100.0]	44	117	1	r1i1p3	GISS–E2–R	RCP4.5	100	2057	2045	2084	100	29.1155	0.275608	100	2057	0.99	2058	0.01
1249	r1i1p3_GISS–E2–R_RCP4.5_074.final.csv	[1861.0, 1907, 1930, 1976, 1998, 2013, 2027, 2045, 2057, 2084, 2100.0]	44	117	1	r1i1p3	GISS–E2–R	RCP4.5	100	2084	2057	2100	100	20.3939	0.141871	100	2084	0.77	2085	0.21
Seq	Source	BreakSet	DatasetNo	SetNo	SetNoInData	Type	Model	Treat	%BreakSet	Year	Predecessor	Successor	%SegmentFound	Ti	Shift	%YearOverall	ModalYear	ModalValue	SecondModalYear	SecondModalValue
1250	r2i1p1_CanESM2_RCP4.5_006.final.csv	[1861.0, 1917, 1985, 2002, 2021, 2040, 2057, 2068, 2089, 2100.0]	45	118	1	r2i1p1	CanESM2	RCP4.5	34	1917	1861	1985	100	39.0502	0.204208	100	1917	0.92	1910	0.08
1251	r2i1p1_CanESM2_RCP4.5_006.final.csv	[1861.0, 1917, 1985, 2002, 2021, 2040, 2057, 2068, 2089, 2100.0]	45	118	1	r2i1p1	CanESM2	RCP4.5	34	1985	1917	2002	100	50.4295	0.488348	100	1985	1	0	0
1252	r2i1p1_CanESM2_RCP4.5_006.final.csv	[1861.0, 1917, 1985, 2002, 2021, 2040, 2057, 2068, 2089, 2100.0]	45	118	1	r2i1p1	CanESM2	RCP4.5	34	2002	1985	2021	34	28.3343	0.674355	100	2002	1	0	0
1253	r2i1p1_CanESM2_RCP4.5_006.final.csv	[1861.0, 1917, 1985, 2002, 2021, 2040, 2057, 2068, 2089, 2100.0]	45	118	1	r2i1p1	CanESM2	RCP4.5	34	2021	2002	2040	34	28.5697	0.561632	36	2021	1	0	0
1254	r2i1p1_CanESM2_RCP4.5_006.final.csv	[1861.0, 1917, 1985, 2002, 2021, 2040, 2057, 2068, 2089, 2100.0]	45	118	1	r2i1p1	CanESM2	RCP4.5	34	2040	2021	2057	36	30.2476	0.621049	100	2040	0.72	2039	0.28
1255	r2i1p1_CanESM2_RCP4.5_006.final.csv	[1861.0, 1917, 1985, 2002, 2021, 2040, 2057, 2068, 2089, 2100.0]	45	118	1	r2i1p1	CanESM2	RCP4.5	34	2057	2040	2068	100	21.6447	0.300668	100	2057	1	0	0
1256	r2i1p1_CanESM2_RCP4.5_006.final.csv	[1861.0, 1917, 1985, 2002, 2021, 2040, 2057, 2068, 2089, 2100.0]	45	118	1	r2i1p1	CanESM2	RCP4.5	34	2068	2057	2089	100	18.7474	0.214139	100	2068	0.92	2069	0.06
1257	r2i1p1_CanESM2_RCP4.5_006.final.csv	[1861.0, 1917, 1985, 2002, 2021, 2040, 2057, 2068, 2089, 2100.0]	45	118	1	r2i1p1	CanESM2	RCP4.5	34	2089	2068	2100	100	17.5759	0.184852	100	2089	0.99	2087	0.01
1258	r2i1p1_CanESM2_RCP4.5_006.final.csv	[1861.0, 1917, 1985, 2002, 2014, 2021, 2040, 2057, 2068, 2089, 2100.0]	45	119	2	r2i1p1	CanESM2	RCP4.5	2	1917	1861	1985	100	39.0502	0.204208	100	1917	0.92	1910	0.08
1259	r2i1p1_CanESM2_RCP4.5_006.final.csv	[1861.0, 1917, 1985, 2002, 2014, 2021, 2040, 2057, 2068, 2089, 2100.0]	45	119	2	r2i1p1	CanESM2	RCP4.5	2	1985	1917	2002	100	50.4295	0.488348	100	1985	1	0	0
1260	r2i1p1_CanESM2_RCP4.5_006.final.csv	[1861.0, 1917, 1985, 2002, 2014, 2021, 2040, 2057, 2068, 2089, 2100.0]	45	119	2	r2i1p1	CanESM2	RCP4.5	2	2002	1985	2014	55	22.1545	0.580586	100	2002	0.96	1997	0.03
1261	r2i1p1_CanESM2_RCP4.5_006.final.csv	[1861.0, 1917, 1985, 2002, 2014, 2021, 2040, 2057, 2068, 2089, 2100.0]	45	119	2	r2i1p1	CanESM2	RCP4.5	2	2014	2002	2021	2	12.4428	0.259694	55	2014	0.96	2015	0.04
1262	r2i1p1_CanESM2_RCP4.5_006.final.csv	[1861.0, 1917, 1985, 2002, 2014, 2021, 2040, 2057, 2068, 2089, 2100.0]	45	119	2	r2i1p1	CanESM2	RCP4.5	2	2021	2014	2040	2	16.2679	0.369083	36	2025	0.83	2021	0.11
1263	r2i1p1_CanESM2_RCP4.5_006.final.csv	[1861.0, 1917, 1985, 2002, 2014, 2021, 2040, 2057, 2068, 2089, 2100.0]	45	119	2	r2i1p1	CanESM2	RCP4.5	2	2040	2021	2057	36	30.2476	0.621049	100	2040	0.72	2039	0.28
1264	r2i1p1_CanESM2_RCP4.5_006.final.csv	[1861.0, 1917, 1985, 2002, 2014, 2021, 2040, 2057, 2068, 2089, 2100.0]	45	119	2	r2i1p1	CanESM2	RCP4.5	2	2057	2040	2068	100	21.6447	0.300668	100	2057	1	0	0
1265	r2i1p1_CanESM2_RCP4.5_006.final.csv	[1861.0, 1917, 1985, 2002, 2014, 2021, 2040, 2057, 2068, 2089, 2100.0]	45	119	2	r2i1p1	CanESM2	RCP4.5	2	2068	2057	2089	100	18.7474	0.214139	100	2068	0.92	2069	0.06
1266	r2i1p1_CanESM2_RCP4.5_006.final.csv	[1861.0, 1917, 1985, 2002, 2014, 2021, 2040, 2057, 2068, 2089, 2100.0]	45	119	2	r2i1p1	CanESM2	RCP4.5	2	2089	2068	2100	100	17.5759	0.184852	100	2089	0.99	2087	0.01
1267	r2i1p1_CanESM2_RCP4.5_006.final.csv	[1861.0, 1917, 1985, 2002, 2015, 2025, 2040, 2057, 2068, 2089, 2100.0]	45	120	3	r2i1p1	CanESM2	RCP4.5	11	1917	1861	1985	100	39.0502	0.204208	100	1917	0.92	1910	0.08
1268	r2i1p1_CanESM2_RCP4.5_006.final.csv	[1861.0, 1917, 1985, 2002, 2015, 2025, 2040, 2057, 2068, 2089, 2100.0]	45	120	3	r2i1p1	CanESM2	RCP4.5	11	1985	1917	2002	100	50.4295	0.488348	100	1985	1	0	0
1269	r2i1p1_CanESM2_RCP4.5_006.final.csv	[1861.0, 1917, 1985, 2002, 2015, 2025, 2040, 2057, 2068, 2089, 2100.0]	45	120	3	r2i1p1	CanESM2	RCP4.5	11	2002	1985	2015	11	23.2183	0.59377	100	2002	1	0	0
1270	r2i1p1_CanESM2_RCP4.5_006.final.csv	[1861.0, 1917, 1985, 2002, 2015, 2025, 2040, 2057, 2068, 2089, 2100.0]	45	120	3	r2i1p1	CanESM2	RCP4.5	11	2015	2002	2025	11	15.6155	0.341922	11	2015	0.56	2014	0.36
1271	r2i1p1_CanESM2_RCP4.5_006.final.csv	[1861.0, 1917, 1985, 2002, 2015, 2025, 2040, 2057, 2068, 2089, 2100.0]	45	120	3	r2i1p1	CanESM2	RCP4.5	11	2025	2015	2040	11	15.3223	0.351255	64	2025	0.75	2026	0.16
1272	r2i1p1_CanESM2_RCP4.5_006.final.csv	[1861.0, 1917, 1985, 2002, 2015, 2025, 2040, 2057, 2068, 2089, 2100.0]	45	120	3	r2i1p1	CanESM2	RCP4.5	11	2040	2025	2057	64	27.3274	0.572264	100	2040	0.92	2039	0.08
1273	r2i1p1_CanESM2_RCP4.5_006.final.csv	[1861.0, 1917, 1985, 2002, 2015, 2025, 2040, 2057, 2068, 2089, 2100.0]	45	120	3	r2i1p1	CanESM2	RCP4.5	11	2057	2040	2068	100	21.6447	0.300668	100	2057	1	0	0
1274	r2i1p1_CanESM2_RCP4.5_006.final.csv	[1861.0, 1917, 1985, 2002, 2015, 2025, 2040, 2057, 2068, 2089, 2100.0]	45	120	3	r2i1p1	CanESM2	RCP4.5	11	2068	2057	2089	100	18.7474	0.214139	100	2068	0.92	2069	0.06
1275	r2i1p1_CanESM2_RCP4.5_006.final.csv	[1861.0, 1917, 1985, 2002, 2015, 2025, 2040, 2057, 2068, 2089, 2100.0]	45	120	3	r2i1p1	CanESM2	RCP4.5	11	2089	2068	2100	100	17.5759	0.184852	100	2089	0.99	2087	0.01
1276	r2i1p1_CanESM2_RCP4.5_006.final.csv	[1861.0, 1917, 1985, 2002, 2014, 2025, 2040, 2057, 2068, 2089, 2100.0]	45	121	4	r2i1p1	CanESM2	RCP4.5	53	1917	1861	1985	100	39.0502	0.204208	100	1917	0.92	1910	0.08
1277	r2i1p1_CanESM2_RCP4.5_006.final.csv	[1861.0, 1917, 1985, 2002, 2014, 2025, 2040, 2057, 2068, 2089, 2100.0]	45	121	4	r2i1p1	CanESM2	RCP4.5	53	1985	1917	2002	100	50.4295	0.488348	100	1985	1	0	0
1278	r2i1p1_CanESM2_RCP4.5_006.final.csv	[1861.0, 1917, 1985, 2002, 2014, 2025, 2040, 2057, 2068, 2089, 2100.0]	45	121	4	r2i1p1	CanESM2	RCP4.5	53	2002	1985	2014	55	22.1545	0.580586	100	2002	0.96	1997	0.03
1279	r2i1p1_CanESM2_RCP4.5_006.final.csv	[1861.0, 1917, 1985, 2002, 2014, 2025, 2040, 2057, 2068, 2089, 2100.0]	45	121	4	r2i1p1	CanESM2	RCP4.5	53	2014	2002	2025	53	15.6155	0.341922	55	2015	0.56	2014	0.36
1280	r2i1p1_CanESM2_RCP4.5_006.final.csv	[1861.0, 1917, 1985, 2002, 2014, 2025, 2040, 2057, 2068, 2089, 2100.0]	45	121	4	r2i1p1	CanESM2	RCP4.5	53	2025	2014	2040	53	16.2679	0.369083	64	2025	0.83	2021	0.11
1281	r2i1p1_CanESM2_RCP4.5_006.final.csv	[1861.0, 1917, 1985, 2002, 2014, 2025, 2040, 2057, 2068, 2089, 2100.0]	45	121	4	r2i1p1	CanESM2	RCP4.5	53	2040	2025	2057	64	27.3274	0.572264	100	2040	0.92	2039	0.08
1282	r2i1p1_CanESM2_RCP4.5_006.final.csv	[1861.0, 1917, 1985, 2002, 2014, 2025, 2040, 2057, 2068, 2089, 2100.0]	45	121	4	r2i1p1	CanESM2	RCP4.5	53	2057	2040	2068	100	21.6447	0.300668	100	2057	1	0	0
1283	r2i1p1_CanESM2_RCP4.5_006.final.csv	[1861.0, 1917, 1985, 2002, 2014, 2025, 2040, 2057, 2068, 2089, 2100.0]	45	121	4	r2i1p1	CanESM2	RCP4.5	53	2068	2057	2089	100	18.7474	0.214139	100	2068	0.92	2069	0.06
1284	r2i1p1_CanESM2_RCP4.5_006.final.csv	[1861.0, 1917, 1985, 2002, 2014, 2025, 2040, 2057, 2068, 2089, 2100.0]	45	121	4	r2i1p1	CanESM2	RCP4.5	53	2089	2068	2100	100	17.5759	0.184852	100	2089	0.99	2087	0.01
Seq	Source	BreakSet	DatasetNo	SetNo	SetNoInData	Type	Model	Treat	%BreakSet	Year	Predecessor	Successor	%SegmentFound	Ti	Shift	%YearOverall	ModalYear	ModalValue	SecondModalYear	SecondModalValue
1285	r2i1p1_CCSM4_RCP4.5_011.final.csv	[1861.0, 1916, 1944, 1976, 1997, 2012, 2021, 2037, 2054, 2070, 2094, 2100.0]	46	122	1	r2i1p1	CCSM4	RCP4.5	14	1916	1861	1944	100	32.8215	0.213823	100	1916	0.97	1913	0.01
1286	r2i1p1_CCSM4_RCP4.5_011.final.csv	[1861.0, 1916, 1944, 1976, 1997, 2012, 2021, 2037, 2054, 2070, 2094, 2100.0]	46	122	1	r2i1p1	CCSM4	RCP4.5	14	1944	1916	1976	100	22.4678	0.170788	100	1944	0.99	1948	0.01
1287	r2i1p1_CCSM4_RCP4.5_011.final.csv	[1861.0, 1916, 1944, 1976, 1997, 2012, 2021, 2037, 2054, 2070, 2094, 2100.0]	46	122	1	r2i1p1	CCSM4	RCP4.5	14	1976	1944	1997	95	33.1793	0.386435	100	1976	1	0	0
1288	r2i1p1_CCSM4_RCP4.5_011.final.csv	[1861.0, 1916, 1944, 1976, 1997, 2012, 2021, 2037, 2054, 2070, 2094, 2100.0]	46	122	1	r2i1p1	CCSM4	RCP4.5	14	1997	1976	2012	80	27.68	0.515814	95	1997	0.45	1994	0.38
1289	r2i1p1_CCSM4_RCP4.5_011.final.csv	[1861.0, 1916, 1944, 1976, 1997, 2012, 2021, 2037, 2054, 2070, 2094, 2100.0]	46	122	1	r2i1p1	CCSM4	RCP4.5	14	2012	1997	2021	80	14.0522	0.252216	85	2012	0.93	2011	0.05
1290	r2i1p1_CCSM4_RCP4.5_011.final.csv	[1861.0, 1916, 1944, 1976, 1997, 2012, 2021, 2037, 2054, 2070, 2094, 2100.0]	46	122	1	r2i1p1	CCSM4	RCP4.5	14	2021	2012	2037	85	14.9902	0.277777	85	2021	0.89	2022	0.11
1291	r2i1p1_CCSM4_RCP4.5_011.final.csv	[1861.0, 1916, 1944, 1976, 1997, 2012, 2021, 2037, 2054, 2070, 2094, 2100.0]	46	122	1	r2i1p1	CCSM4	RCP4.5	14	2037	2021	2054	15	23.3692	0.324689	100	2037	1	0	0
1292	r2i1p1_CCSM4_RCP4.5_011.final.csv	[1861.0, 1916, 1944, 1976, 1997, 2012, 2021, 2037, 2054, 2070, 2094, 2100.0]	46	122	1	r2i1p1	CCSM4	RCP4.5	14	2054	2037	2070	18	20.2378	0.266296	18	2051	0.43	2054	0.34
1293	r2i1p1_CCSM4_RCP4.5_011.final.csv	[1861.0, 1916, 1944, 1976, 1997, 2012, 2021, 2037, 2054, 2070, 2094, 2100.0]	46	122	1	r2i1p1	CCSM4	RCP4.5	14	2070	2054	2094	18	19.6338	0.169469	37	2071	0.51	2070	0.43
1294	r2i1p1_CCSM4_RCP4.5_011.final.csv	[1861.0, 1916, 1944, 1976, 1997, 2012, 2021, 2037, 2054, 2070, 2094, 2100.0]	46	122	1	r2i1p1	CCSM4	RCP4.5	14	2094	2070	2100	37	15.7173	0.191591	100	2094	1	0	0
1295	r2i1p1_CCSM4_RCP4.5_011.final.csv	[1861.0, 1916, 1944, 1976, 1994, 2012, 2021, 2037, 2054, 2070, 2094, 2100.0]	46	123	2	r2i1p1	CCSM4	RCP4.5	1	1916	1861	1944	100	32.8215	0.213823	100	1916	0.97	1913	0.01
1296	r2i1p1_CCSM4_RCP4.5_011.final.csv	[1861.0, 1916, 1944, 1976, 1994, 2012, 2021, 2037, 2054, 2070, 2094, 2100.0]	46	123	2	r2i1p1	CCSM4	RCP4.5	1	1944	1916	1976	100	22.4678	0.170788	100	1944	0.99	1948	0.01
1297	r2i1p1_CCSM4_RCP4.5_011.final.csv	[1861.0, 1916, 1944, 1976, 1994, 2012, 2021, 2037, 2054, 2070, 2094, 2100.0]	46	123	2	r2i1p1	CCSM4	RCP4.5	1	1976	1944	1994	5	30.2615	0.347633	100	1976	1	0	0
1298	r2i1p1_CCSM4_RCP4.5_011.final.csv	[1861.0, 1916, 1944, 1976, 1994, 2012, 2021, 2037, 2054, 2070, 2094, 2100.0]	46	123	2	r2i1p1	CCSM4	RCP4.5	1	1994	1976	2012	5	27.68	0.515814	5	1997	0.45	1994	0.38
1299	r2i1p1_CCSM4_RCP4.5_011.final.csv	[1861.0, 1916, 1944, 1976, 1994, 2012, 2021, 2037, 2054, 2070, 2094, 2100.0]	46	123	2	r2i1p1	CCSM4	RCP4.5	1	2012	1994	2021	5	14.5445	0.298965	85	2012	0.58	2011	0.22
1300	r2i1p1_CCSM4_RCP4.5_011.final.csv	[1861.0, 1916, 1944, 1976, 1994, 2012, 2021, 2037, 2054, 2070, 2094, 2100.0]	46	123	2	r2i1p1	CCSM4	RCP4.5	1	2021	2012	2037	85	14.9902	0.277777	85	2021	0.89	2022	0.11
1301	r2i1p1_CCSM4_RCP4.5_011.final.csv	[1861.0, 1916, 1944, 1976, 1994, 2012, 2021, 2037, 2054, 2070, 2094, 2100.0]	46	123	2	r2i1p1	CCSM4	RCP4.5	1	2037	2021	2054	15	23.3692	0.324689	100	2037	1	0	0
1302	r2i1p1_CCSM4_RCP4.5_011.final.csv	[1861.0, 1916, 1944, 1976, 1994, 2012, 2021, 2037, 2054, 2070, 2094, 2100.0]	46	123	2	r2i1p1	CCSM4	RCP4.5	1	2054	2037	2070	18	20.2378	0.266296	18	2051	0.43	2054	0.34
1303	r2i1p1_CCSM4_RCP4.5_011.final.csv	[1861.0, 1916, 1944, 1976, 1994, 2012, 2021, 2037, 2054, 2070, 2094, 2100.0]	46	123	2	r2i1p1	CCSM4	RCP4.5	1	2070	2054	2094	18	19.6338	0.169469	37	2071	0.51	2070	0.43
1304	r2i1p1_CCSM4_RCP4.5_011.final.csv	[1861.0, 1916, 1944, 1976, 1994, 2012, 2021, 2037, 2054, 2070, 2094, 2100.0]	46	123	2	r2i1p1	CCSM4	RCP4.5	1	2094	2070	2100	37	15.7173	0.191591	100	2094	1	0	0
1305	r2i1p1_CCSM4_RCP4.5_011.final.csv	[1861.0, 1916, 1944, 1976, 1997, 2012, 2021, 2037, 2051, 2070, 2094, 2100.0]	46	124	3	r2i1p1	CCSM4	RCP4.5	16	1916	1861	1944	100	32.8215	0.213823	100	1916	0.97	1913	0.01
1306	r2i1p1_CCSM4_RCP4.5_011.final.csv	[1861.0, 1916, 1944, 1976, 1997, 2012, 2021, 2037, 2051, 2070, 2094, 2100.0]	46	124	3	r2i1p1	CCSM4	RCP4.5	16	1944	1916	1976	100	22.4678	0.170788	100	1944	0.99	1948	0.01
1307	r2i1p1_CCSM4_RCP4.5_011.final.csv	[1861.0, 1916, 1944, 1976, 1997, 2012, 2021, 2037, 2051, 2070, 2094, 2100.0]	46	124	3	r2i1p1	CCSM4	RCP4.5	16	1976	1944	1997	95	33.1793	0.386435	100	1976	1	0	0
1308	r2i1p1_CCSM4_RCP4.5_011.final.csv	[1861.0, 1916, 1944, 1976, 1997, 2012, 2021, 2037, 2051, 2070, 2094, 2100.0]	46	124	3	r2i1p1	CCSM4	RCP4.5	16	1997	1976	2012	80	27.68	0.515814	95	1997	0.45	1994	0.38
1309	r2i1p1_CCSM4_RCP4.5_011.final.csv	[1861.0, 1916, 1944, 1976, 1997, 2012, 2021, 2037, 2051, 2070, 2094, 2100.0]	46	124	3	r2i1p1	CCSM4	RCP4.5	16	2012	1997	2021	80	14.0522	0.252216	85	2012	0.93	2011	0.05
1310	r2i1p1_CCSM4_RCP4.5_011.final.csv	[1861.0, 1916, 1944, 1976, 1997, 2012, 2021, 2037, 2051, 2070, 2094, 2100.0]	46	124	3	r2i1p1	CCSM4	RCP4.5	16	2021	2012	2037	85	14.9902	0.277777	85	2021	0.89	2022	0.11
1311	r2i1p1_CCSM4_RCP4.5_011.final.csv	[1861.0, 1916, 1944, 1976, 1997, 2012, 2021, 2037, 2051, 2070, 2094, 2100.0]	46	124	3	r2i1p1	CCSM4	RCP4.5	16	2037	2021	2051	70	21.1593	0.298023	100	2037	1	0	0
1312	r2i1p1_CCSM4_RCP4.5_011.final.csv	[1861.0, 1916, 1944, 1976, 1997, 2012, 2021, 2037, 2051, 2070, 2094, 2100.0]	46	124	3	r2i1p1	CCSM4	RCP4.5	16	2051	2037	2070	19	20.2378	0.266296	82	2051	0.43	2054	0.34
1313	r2i1p1_CCSM4_RCP4.5_011.final.csv	[1861.0, 1916, 1944, 1976, 1997, 2012, 2021, 2037, 2051, 2070, 2094, 2100.0]	46	124	3	r2i1p1	CCSM4	RCP4.5	16	2070	2051	2094	19	22.3696	0.20387	37	2066	0.43	2070	0.37
1314	r2i1p1_CCSM4_RCP4.5_011.final.csv	[1861.0, 1916, 1944, 1976, 1997, 2012, 2021, 2037, 2051, 2070, 2094, 2100.0]	46	124	3	r2i1p1	CCSM4	RCP4.5	16	2094	2070	2100	37	15.7173	0.191591	100	2094	1	0	0
1315	r2i1p1_CCSM4_RCP4.5_011.final.csv	[1861.0, 1916, 1944, 1976, 1994, 2012, 2021, 2037, 2051, 2066, 2094, 2100.0]	46	125	4	r2i1p1	CCSM4	RCP4.5	4	1916	1861	1944	100	32.8215	0.213823	100	1916	0.97	1913	0.01
1316	r2i1p1_CCSM4_RCP4.5_011.final.csv	[1861.0, 1916, 1944, 1976, 1994, 2012, 2021, 2037, 2051, 2066, 2094, 2100.0]	46	125	4	r2i1p1	CCSM4	RCP4.5	4	1944	1916	1976	100	22.4678	0.170788	100	1944	0.99	1948	0.01
1317	r2i1p1_CCSM4_RCP4.5_011.final.csv	[1861.0, 1916, 1944, 1976, 1994, 2012, 2021, 2037, 2051, 2066, 2094, 2100.0]	46	125	4	r2i1p1	CCSM4	RCP4.5	4	1976	1944	1994	5	30.2615	0.347633	100	1976	1	0	0
1318	r2i1p1_CCSM4_RCP4.5_011.final.csv	[1861.0, 1916, 1944, 1976, 1994, 2012, 2021, 2037, 2051, 2066, 2094, 2100.0]	46	125	4	r2i1p1	CCSM4	RCP4.5	4	1994	1976	2012	5	27.68	0.515814	5	1997	0.45	1994	0.38
1319	r2i1p1_CCSM4_RCP4.5_011.final.csv	[1861.0, 1916, 1944, 1976, 1994, 2012, 2021, 2037, 2051, 2066, 2094, 2100.0]	46	125	4	r2i1p1	CCSM4	RCP4.5	4	2012	1994	2021	5	14.5445	0.298965	85	2012	0.58	2011	0.22
1320	r2i1p1_CCSM4_RCP4.5_011.final.csv	[1861.0, 1916, 1944, 1976, 1994, 2012, 2021, 2037, 2051, 2066, 2094, 2100.0]	46	125	4	r2i1p1	CCSM4	RCP4.5	4	2021	2012	2037	85	14.9902	0.277777	85	2021	0.89	2022	0.11
1321	r2i1p1_CCSM4_RCP4.5_011.final.csv	[1861.0, 1916, 1944, 1976, 1994, 2012, 2021, 2037, 2051, 2066, 2094, 2100.0]	46	125	4	r2i1p1	CCSM4	RCP4.5	4	2037	2021	2051	70	21.1593	0.298023	100	2037	1	0	0
1322	r2i1p1_CCSM4_RCP4.5_011.final.csv	[1861.0, 1916, 1944, 1976, 1994, 2012, 2021, 2037, 2051, 2066, 2094, 2100.0]	46	125	4	r2i1p1	CCSM4	RCP4.5	4	2051	2037	2066	63	17.7512	0.244219	82	2051	0.58	2050	0.32
1323	r2i1p1_CCSM4_RCP4.5_011.final.csv	[1861.0, 1916, 1944, 1976, 1994, 2012, 2021, 2037, 2051, 2066, 2094, 2100.0]	46	125	4	r2i1p1	CCSM4	RCP4.5	4	2066	2051	2094	63	22.3696	0.20387	63	2066	0.43	2070	0.37
1324	r2i1p1_CCSM4_RCP4.5_011.final.csv	[1861.0, 1916, 1944, 1976, 1994, 2012, 2021, 2037, 2051, 2066, 2094, 2100.0]	46	125	4	r2i1p1	CCSM4	RCP4.5	4	2094	2066	2100	63	15.844	0.206406	100	2094	0.97	2089	0.03
1325	r2i1p1_CCSM4_RCP4.5_011.final.csv	[1861.0, 1916, 1944, 1976, 1997, 2016, 2037, 2051, 2066, 2094, 2100.0]	46	126	5	r2i1p1	CCSM4	RCP4.5	9	1916	1861	1944	100	32.8215	0.213823	100	1916	0.97	1913	0.01
1326	r2i1p1_CCSM4_RCP4.5_011.final.csv	[1861.0, 1916, 1944, 1976, 1997, 2016, 2037, 2051, 2066, 2094, 2100.0]	46	126	5	r2i1p1	CCSM4	RCP4.5	9	1944	1916	1976	100	22.4678	0.170788	100	1944	0.99	1948	0.01
1327	r2i1p1_CCSM4_RCP4.5_011.final.csv	[1861.0, 1916, 1944, 1976, 1997, 2016, 2037, 2051, 2066, 2094, 2100.0]	46	126	5	r2i1p1	CCSM4	RCP4.5	9	1976	1944	1997	95	33.1793	0.386435	100	1976	1	0	0
1328	r2i1p1_CCSM4_RCP4.5_011.final.csv	[1861.0, 1916, 1944, 1976, 1997, 2016, 2037, 2051, 2066, 2094, 2100.0]	46	126	5	r2i1p1	CCSM4	RCP4.5	9	1997	1976	2016	15	31.316	0.553575	95	1997	0.92	1994	0.03
1329	r2i1p1_CCSM4_RCP4.5_011.final.csv	[1861.0, 1916, 1944, 1976, 1997, 2016, 2037, 2051, 2066, 2094, 2100.0]	46	126	5	r2i1p1	CCSM4	RCP4.5	9	2016	1997	2037	15	29.4054	0.436521	15	2016	0.93	2015	0.06
1330	r2i1p1_CCSM4_RCP4.5_011.final.csv	[1861.0, 1916, 1944, 1976, 1997, 2016, 2037, 2051, 2066, 2094, 2100.0]	46	126	5	r2i1p1	CCSM4	RCP4.5	9	2037	2016	2051	12	22.7388	0.351933	100	2037	1	0	0
1331	r2i1p1_CCSM4_RCP4.5_011.final.csv	[1861.0, 1916, 1944, 1976, 1997, 2016, 2037, 2051, 2066, 2094, 2100.0]	46	126	5	r2i1p1	CCSM4	RCP4.5	9	2051	2037	2066	63	17.7512	0.244219	82	2051	0.58	2050	0.32
1332	r2i1p1_CCSM4_RCP4.5_011.final.csv	[1861.0, 1916, 1944, 1976, 1997, 2016, 2037, 2051, 2066, 2094, 2100.0]	46	126	5	r2i1p1	CCSM4	RCP4.5	9	2066	2051	2094	63	22.3696	0.20387	63	2066	0.43	2070	0.37
1333	r2i1p1_CCSM4_RCP4.5_011.final.csv	[1861.0, 1916, 1944, 1976, 1997, 2016, 2037, 2051, 2066, 2094, 2100.0]	46	126	5	r2i1p1	CCSM4	RCP4.5	9	2094	2066	2100	63	15.844	0.206406	100	2094	0.97	2089	0.03
1334	r2i1p1_CCSM4_RCP4.5_011.final.csv	[1861.0, 1916, 1944, 1976, 1997, 2012, 2021, 2037, 2051, 2066, 2094, 2100.0]	46	127	6	r2i1p1	CCSM4	RCP4.5	50	1916	1861	1944	100	32.8215	0.213823	100	1916	0.97	1913	0.01
1335	r2i1p1_CCSM4_RCP4.5_011.final.csv	[1861.0, 1916, 1944, 1976, 1997, 2012, 2021, 2037, 2051, 2066, 2094, 2100.0]	46	127	6	r2i1p1	CCSM4	RCP4.5	50	1944	1916	1976	100	22.4678	0.170788	100	1944	0.99	1948	0.01
1336	r2i1p1_CCSM4_RCP4.5_011.final.csv	[1861.0, 1916, 1944, 1976, 1997, 2012, 2021, 2037, 2051, 2066, 2094, 2100.0]	46	127	6	r2i1p1	CCSM4	RCP4.5	50	1976	1944	1997	95	33.1793	0.386435	100	1976	1	0	0
1337	r2i1p1_CCSM4_RCP4.5_011.final.csv	[1861.0, 1916, 1944, 1976, 1997, 2012, 2021, 2037, 2051, 2066, 2094, 2100.0]	46	127	6	r2i1p1	CCSM4	RCP4.5	50	1997	1976	2012	80	27.68	0.515814	95	1997	0.45	1994	0.38
1338	r2i1p1_CCSM4_RCP4.5_011.final.csv	[1861.0, 1916, 1944, 1976, 1997, 2012, 2021, 2037, 2051, 2066, 2094, 2100.0]	46	127	6	r2i1p1	CCSM4	RCP4.5	50	2012	1997	2021	80	14.0522	0.252216	85	2012	0.93	2011	0.05
1339	r2i1p1_CCSM4_RCP4.5_011.final.csv	[1861.0, 1916, 1944, 1976, 1997, 2012, 2021, 2037, 2051, 2066, 2094, 2100.0]	46	127	6	r2i1p1	CCSM4	RCP4.5	50	2021	2012	2037	85	14.9902	0.277777	85	2021	0.89	2022	0.11
1340	r2i1p1_CCSM4_RCP4.5_011.final.csv	[1861.0, 1916, 1944, 1976, 1997, 2012, 2021, 2037, 2051, 2066, 2094, 2100.0]	46	127	6	r2i1p1	CCSM4	RCP4.5	50	2037	2021	2051	70	21.1593	0.298023	100	2037	1	0	0
1341	r2i1p1_CCSM4_RCP4.5_011.final.csv	[1861.0, 1916, 1944, 1976, 1997, 2012, 2021, 2037, 2051, 2066, 2094, 2100.0]	46	127	6	r2i1p1	CCSM4	RCP4.5	50	2051	2037	2066	63	17.7512	0.244219	82	2051	0.58	2050	0.32
1342	r2i1p1_CCSM4_RCP4.5_011.final.csv	[1861.0, 1916, 1944, 1976, 1997, 2012, 2021, 2037, 2051, 2066, 2094, 2100.0]	46	127	6	r2i1p1	CCSM4	RCP4.5	50	2066	2051	2094	63	22.3696	0.20387	63	2066	0.43	2070	0.37
1343	r2i1p1_CCSM4_RCP4.5_011.final.csv	[1861.0, 1916, 1944, 1976, 1997, 2012, 2021, 2037, 2051, 2066, 2094, 2100.0]	46	127	6	r2i1p1	CCSM4	RCP4.5	50	2094	2066	2100	63	15.844	0.206406	100	2094	0.97	2089	0.03
1344	r2i1p1_CCSM4_RCP4.5_011.final.csv	[1861.0, 1916, 1944, 1976, 1997, 2016, 2037, 2051, 2070, 2094, 2100.0]	46	128	7	r2i1p1	CCSM4	RCP4.5	3	1916	1861	1944	100	32.8215	0.213823	100	1916	0.97	1913	0.01
1345	r2i1p1_CCSM4_RCP4.5_011.final.csv	[1861.0, 1916, 1944, 1976, 1997, 2016, 2037, 2051, 2070, 2094, 2100.0]	46	128	7	r2i1p1	CCSM4	RCP4.5	3	1944	1916	1976	100	22.4678	0.170788	100	1944	0.99	1948	0.01
1346	r2i1p1_CCSM4_RCP4.5_011.final.csv	[1861.0, 1916, 1944, 1976, 1997, 2016, 2037, 2051, 2070, 2094, 2100.0]	46	128	7	r2i1p1	CCSM4	RCP4.5	3	1976	1944	1997	95	33.1793	0.386435	100	1976	1	0	0
1347	r2i1p1_CCSM4_RCP4.5_011.final.csv	[1861.0, 1916, 1944, 1976, 1997, 2016, 2037, 2051, 2070, 2094, 2100.0]	46	128	7	r2i1p1	CCSM4	RCP4.5	3	1997	1976	2016	15	31.316	0.553575	95	1997	0.92	1994	0.03
1348	r2i1p1_CCSM4_RCP4.5_011.final.csv	[1861.0, 1916, 1944, 1976, 1997, 2016, 2037, 2051, 2070, 2094, 2100.0]	46	128	7	r2i1p1	CCSM4	RCP4.5	3	2016	1997	2037	15	29.4054	0.436521	15	2016	0.93	2015	0.06
1349	r2i1p1_CCSM4_RCP4.5_011.final.csv	[1861.0, 1916, 1944, 1976, 1997, 2016, 2037, 2051, 2070, 2094, 2100.0]	46	128	7	r2i1p1	CCSM4	RCP4.5	3	2037	2016	2051	12	22.7388	0.351933	100	2037	1	0	0
1350	r2i1p1_CCSM4_RCP4.5_011.final.csv	[1861.0, 1916, 1944, 1976, 1997, 2016, 2037, 2051, 2070, 2094, 2100.0]	46	128	7	r2i1p1	CCSM4	RCP4.5	3	2051	2037	2070	19	20.2378	0.266296	82	2051	0.43	2054	0.34
1351	r2i1p1_CCSM4_RCP4.5_011.final.csv	[1861.0, 1916, 1944, 1976, 1997, 2016, 2037, 2051, 2070, 2094, 2100.0]	46	128	7	r2i1p1	CCSM4	RCP4.5	3	2070	2051	2094	19	22.3696	0.20387	37	2066	0.43	2070	0.37
1352	r2i1p1_CCSM4_RCP4.5_011.final.csv	[1861.0, 1916, 1944, 1976, 1997, 2016, 2037, 2051, 2070, 2094, 2100.0]	46	128	7	r2i1p1	CCSM4	RCP4.5	3	2094	2070	2100	37	15.7173	0.191591	100	2094	1	0	0
1353	r2i1p1_CCSM4_RCP4.5_011.final.csv	[1861.0, 1916, 1944, 1976, 1997, 2016, 2037, 2054, 2070, 2094, 2100.0]	46	129	8	r2i1p1	CCSM4	RCP4.5	3	1916	1861	1944	100	32.8215	0.213823	100	1916	0.97	1913	0.01
1354	r2i1p1_CCSM4_RCP4.5_011.final.csv	[1861.0, 1916, 1944, 1976, 1997, 2016, 2037, 2054, 2070, 2094, 2100.0]	46	129	8	r2i1p1	CCSM4	RCP4.5	3	1944	1916	1976	100	22.4678	0.170788	100	1944	0.99	1948	0.01
1355	r2i1p1_CCSM4_RCP4.5_011.final.csv	[1861.0, 1916, 1944, 1976, 1997, 2016, 2037, 2054, 2070, 2094, 2100.0]	46	129	8	r2i1p1	CCSM4	RCP4.5	3	1976	1944	1997	95	33.1793	0.386435	100	1976	1	0	0
1356	r2i1p1_CCSM4_RCP4.5_011.final.csv	[1861.0, 1916, 1944, 1976, 1997, 2016, 2037, 2054, 2070, 2094, 2100.0]	46	129	8	r2i1p1	CCSM4	RCP4.5	3	1997	1976	2016	15	31.316	0.553575	95	1997	0.92	1994	0.03
1357	r2i1p1_CCSM4_RCP4.5_011.final.csv	[1861.0, 1916, 1944, 1976, 1997, 2016, 2037, 2054, 2070, 2094, 2100.0]	46	129	8	r2i1p1	CCSM4	RCP4.5	3	2016	1997	2037	15	29.4054	0.436521	15	2016	0.93	2015	0.06
1358	r2i1p1_CCSM4_RCP4.5_011.final.csv	[1861.0, 1916, 1944, 1976, 1997, 2016, 2037, 2054, 2070, 2094, 2100.0]	46	129	8	r2i1p1	CCSM4	RCP4.5	3	2037	2016	2054	3	25.5719	0.377172	100	2037	0.99	2036	0.01
1359	r2i1p1_CCSM4_RCP4.5_011.final.csv	[1861.0, 1916, 1944, 1976, 1997, 2016, 2037, 2054, 2070, 2094, 2100.0]	46	129	8	r2i1p1	CCSM4	RCP4.5	3	2054	2037	2070	18	20.2378	0.266296	18	2051	0.43	2054	0.34
1360	r2i1p1_CCSM4_RCP4.5_011.final.csv	[1861.0, 1916, 1944, 1976, 1997, 2016, 2037, 2054, 2070, 2094, 2100.0]	46	129	8	r2i1p1	CCSM4	RCP4.5	3	2070	2054	2094	18	19.6338	0.169469	37	2071	0.51	2070	0.43
1361	r2i1p1_CCSM4_RCP4.5_011.final.csv	[1861.0, 1916, 1944, 1976, 1997, 2016, 2037, 2054, 2070, 2094, 2100.0]	46	129	8	r2i1p1	CCSM4	RCP4.5	3	2094	2070	2100	37	15.7173	0.191591	100	2094	1	0	0
Seq	Source	BreakSet	DatasetNo	SetNo	SetNoInData	Type	Model	Treat	%BreakSet	Year	Predecessor	Successor	%SegmentFound	Ti	Shift	%YearOverall	ModalYear	ModalValue	SecondModalYear	SecondModalValue
1362	r2i1p1_CESM1–CAM5_RCP4.5_018.final.csv	[1861.0, 1883, 1916, 1976, 1993, 2001, 2015, 2029, 2039, 2047, 2056, 2067, 2088, 2100.0]	47	130	1	r2i1p1	CESM1–CAM5	RCP4.5	4	1883	1861	1916	100	28.3027	–0.226955487758	100	1883	1	0	0
1363	r2i1p1_CESM1–CAM5_RCP4.5_018.final.csv	[1861.0, 1883, 1916, 1976, 1993, 2001, 2015, 2029, 2039, 2047, 2056, 2067, 2088, 2100.0]	47	130	1	r2i1p1	CESM1–CAM5	RCP4.5	4	1916	1883	1976	100	53.8645	0.251105	100	1916	0.98	1915	0.02
1364	r2i1p1_CESM1–CAM5_RCP4.5_018.final.csv	[1861.0, 1883, 1916, 1976, 1993, 2001, 2015, 2029, 2039, 2047, 2056, 2067, 2088, 2100.0]	47	130	1	r2i1p1	CESM1–CAM5	RCP4.5	4	1976	1916	1993	100	31.1396	0.189763	100	1976	0.84	1977	0.16
1365	r2i1p1_CESM1–CAM5_RCP4.5_018.final.csv	[1861.0, 1883, 1916, 1976, 1993, 2001, 2015, 2029, 2039, 2047, 2056, 2067, 2088, 2100.0]	47	130	1	r2i1p1	CESM1–CAM5	RCP4.5	4	1993	1976	2001	99	14.697	0.232328	100	1993	0.69	1994	0.31
1366	r2i1p1_CESM1–CAM5_RCP4.5_018.final.csv	[1861.0, 1883, 1916, 1976, 1993, 2001, 2015, 2029, 2039, 2047, 2056, 2067, 2088, 2100.0]	47	130	1	r2i1p1	CESM1–CAM5	RCP4.5	4	2001	1993	2015	95	14.0737	0.288849	99	2001	0.82	2002	0.18
1367	r2i1p1_CESM1–CAM5_RCP4.5_018.final.csv	[1861.0, 1883, 1916, 1976, 1993, 2001, 2015, 2029, 2039, 2047, 2056, 2067, 2088, 2100.0]	47	130	1	r2i1p1	CESM1–CAM5	RCP4.5	4	2015	2001	2029	52	19.2972	0.413444	95	2015	0.99	2020	0.01
1368	r2i1p1_CESM1–CAM5_RCP4.5_018.final.csv	[1861.0, 1883, 1916, 1976, 1993, 2001, 2015, 2029, 2039, 2047, 2056, 2067, 2088, 2100.0]	47	130	1	r2i1p1	CESM1–CAM5	RCP4.5	4	2029	2015	2039	52	15.9457	0.377191	52	2029	0.99	2025	0.01
1369	r2i1p1_CESM1–CAM5_RCP4.5_018.final.csv	[1861.0, 1883, 1916, 1976, 1993, 2001, 2015, 2029, 2039, 2047, 2056, 2067, 2088, 2100.0]	47	130	1	r2i1p1	CESM1–CAM5	RCP4.5	4	2039	2029	2047	52	12.1543	0.237425	52	2039	0.71	2035	0.23
1370	r2i1p1_CESM1–CAM5_RCP4.5_018.final.csv	[1861.0, 1883, 1916, 1976, 1993, 2001, 2015, 2029, 2039, 2047, 2056, 2067, 2088, 2100.0]	47	130	1	r2i1p1	CESM1–CAM5	RCP4.5	4	2047	2039	2056	52	9.82997	0.17662	100	2047	1	0	0
1371	r2i1p1_CESM1–CAM5_RCP4.5_018.final.csv	[1861.0, 1883, 1916, 1976, 1993, 2001, 2015, 2029, 2039, 2047, 2056, 2067, 2088, 2100.0]	47	130	1	r2i1p1	CESM1–CAM5	RCP4.5	4	2056	2047	2067	100	14.817	0.288846	100	2056	0.93	2057	0.07
1372	r2i1p1_CESM1–CAM5_RCP4.5_018.final.csv	[1861.0, 1883, 1916, 1976, 1993, 2001, 2015, 2029, 2039, 2047, 2056, 2067, 2088, 2100.0]	47	130	1	r2i1p1	CESM1–CAM5	RCP4.5	4	2067	2056	2088	15	22.6777	0.301189	100	2067	1	0	0
1373	r2i1p1_CESM1–CAM5_RCP4.5_018.final.csv	[1861.0, 1883, 1916, 1976, 1993, 2001, 2015, 2029, 2039, 2047, 2056, 2067, 2088, 2100.0]	47	130	1	r2i1p1	CESM1–CAM5	RCP4.5	4	2088	2067	2100	15	18.461	0.266399	15	2089	0.55	2088	0.44
1374	r2i1p1_CESM1–CAM5_RCP4.5_018.final.csv	[1861.0, 1883, 1916, 1976, 1993, 2001, 2015, 2025, 2035, 2047, 2056, 2067, 2088, 2100.0]	47	131	2	r2i1p1	CESM1–CAM5	RCP4.5	10	1883	1861	1916	100	28.3027	–0.226955487758	100	1883	1	0	0
1375	r2i1p1_CESM1–CAM5_RCP4.5_018.final.csv	[1861.0, 1883, 1916, 1976, 1993, 2001, 2015, 2025, 2035, 2047, 2056, 2067, 2088, 2100.0]	47	131	2	r2i1p1	CESM1–CAM5	RCP4.5	10	1916	1883	1976	100	53.8645	0.251105	100	1916	0.98	1915	0.02
1376	r2i1p1_CESM1–CAM5_RCP4.5_018.final.csv	[1861.0, 1883, 1916, 1976, 1993, 2001, 2015, 2025, 2035, 2047, 2056, 2067, 2088, 2100.0]	47	131	2	r2i1p1	CESM1–CAM5	RCP4.5	10	1976	1916	1993	100	31.1396	0.189763	100	1976	0.84	1977	0.16
1377	r2i1p1_CESM1–CAM5_RCP4.5_018.final.csv	[1861.0, 1883, 1916, 1976, 1993, 2001, 2015, 2025, 2035, 2047, 2056, 2067, 2088, 2100.0]	47	131	2	r2i1p1	CESM1–CAM5	RCP4.5	10	1993	1976	2001	99	14.697	0.232328	100	1993	0.69	1994	0.31
1378	r2i1p1_CESM1–CAM5_RCP4.5_018.final.csv	[1861.0, 1883, 1916, 1976, 1993, 2001, 2015, 2025, 2035, 2047, 2056, 2067, 2088, 2100.0]	47	131	2	r2i1p1	CESM1–CAM5	RCP4.5	10	2001	1993	2015	95	14.0737	0.288849	99	2001	0.82	2002	0.18
1379	r2i1p1_CESM1–CAM5_RCP4.5_018.final.csv	[1861.0, 1883, 1916, 1976, 1993, 2001, 2015, 2025, 2035, 2047, 2056, 2067, 2088, 2100.0]	47	131	2	r2i1p1	CESM1–CAM5	RCP4.5	10	2015	2001	2025	43	16.1575	0.358625	95	2015	1	0	0
1380	r2i1p1_CESM1–CAM5_RCP4.5_018.final.csv	[1861.0, 1883, 1916, 1976, 1993, 2001, 2015, 2025, 2035, 2047, 2056, 2067, 2088, 2100.0]	47	131	2	r2i1p1	CESM1–CAM5	RCP4.5	10	2025	2015	2035	43	11.809	0.301935	43	2025	0.66	2021	0.18
1381	r2i1p1_CESM1–CAM5_RCP4.5_018.final.csv	[1861.0, 1883, 1916, 1976, 1993, 2001, 2015, 2025, 2035, 2047, 2056, 2067, 2088, 2100.0]	47	131	2	r2i1p1	CESM1–CAM5	RCP4.5	10	2035	2025	2047	43	14.5823	0.321573	44	2035	0.87	2034	0.1
1382	r2i1p1_CESM1–CAM5_RCP4.5_018.final.csv	[1861.0, 1883, 1916, 1976, 1993, 2001, 2015, 2025, 2035, 2047, 2056, 2067, 2088, 2100.0]	47	131	2	r2i1p1	CESM1–CAM5	RCP4.5	10	2047	2035	2056	44	12.7662	0.226808	100	2047	0.91	2044	0.06
1383	r2i1p1_CESM1–CAM5_RCP4.5_018.final.csv	[1861.0, 1883, 1916, 1976, 1993, 2001, 2015, 2025, 2035, 2047, 2056, 2067, 2088, 2100.0]	47	131	2	r2i1p1	CESM1–CAM5	RCP4.5	10	2056	2047	2067	100	14.817	0.288846	100	2056	0.93	2057	0.07
1384	r2i1p1_CESM1–CAM5_RCP4.5_018.final.csv	[1861.0, 1883, 1916, 1976, 1993, 2001, 2015, 2025, 2035, 2047, 2056, 2067, 2088, 2100.0]	47	131	2	r2i1p1	CESM1–CAM5	RCP4.5	10	2067	2056	2088	15	22.6777	0.301189	100	2067	1	0	0
1385	r2i1p1_CESM1–CAM5_RCP4.5_018.final.csv	[1861.0, 1883, 1916, 1976, 1993, 2001, 2015, 2025, 2035, 2047, 2056, 2067, 2088, 2100.0]	47	131	2	r2i1p1	CESM1–CAM5	RCP4.5	10	2088	2067	2100	15	18.461	0.266399	15	2089	0.55	2088	0.44
1386	r2i1p1_CESM1–CAM5_RCP4.5_018.final.csv	[1861.0, 1883, 1916, 1976, 1993, 2001, 2021, 2035, 2047, 2056, 2067, 2089, 2100.0]	47	132	3	r2i1p1	CESM1–CAM5	RCP4.5	1	1883	1861	1916	100	28.3027	–0.226955487758	100	1883	1	0	0
1387	r2i1p1_CESM1–CAM5_RCP4.5_018.final.csv	[1861.0, 1883, 1916, 1976, 1993, 2001, 2021, 2035, 2047, 2056, 2067, 2089, 2100.0]	47	132	3	r2i1p1	CESM1–CAM5	RCP4.5	1	1916	1883	1976	100	53.8645	0.251105	100	1916	0.98	1915	0.02
1388	r2i1p1_CESM1–CAM5_RCP4.5_018.final.csv	[1861.0, 1883, 1916, 1976, 1993, 2001, 2021, 2035, 2047, 2056, 2067, 2089, 2100.0]	47	132	3	r2i1p1	CESM1–CAM5	RCP4.5	1	1976	1916	1993	100	31.1396	0.189763	100	1976	0.84	1977	0.16
1389	r2i1p1_CESM1–CAM5_RCP4.5_018.final.csv	[1861.0, 1883, 1916, 1976, 1993, 2001, 2021, 2035, 2047, 2056, 2067, 2089, 2100.0]	47	132	3	r2i1p1	CESM1–CAM5	RCP4.5	1	1993	1976	2001	99	14.697	0.232328	100	1993	0.69	1994	0.31
1390	r2i1p1_CESM1–CAM5_RCP4.5_018.final.csv	[1861.0, 1883, 1916, 1976, 1993, 2001, 2021, 2035, 2047, 2056, 2067, 2089, 2100.0]	47	132	3	r2i1p1	CESM1–CAM5	RCP4.5	1	2001	1993	2021	4	16.1437	0.367478	99	2002	0.32	2006	0.3
1391	r2i1p1_CESM1–CAM5_RCP4.5_018.final.csv	[1861.0, 1883, 1916, 1976, 1993, 2001, 2021, 2035, 2047, 2056, 2067, 2089, 2100.0]	47	132	3	r2i1p1	CESM1–CAM5	RCP4.5	1	2021	2001	2035	1	24.0824	0.519519	5	2021	0.8	2020	0.13
1392	r2i1p1_CESM1–CAM5_RCP4.5_018.final.csv	[1861.0, 1883, 1916, 1976, 1993, 2001, 2021, 2035, 2047, 2056, 2067, 2089, 2100.0]	47	132	3	r2i1p1	CESM1–CAM5	RCP4.5	1	2035	2021	2047	1	17.7838	0.373155	44	2034	0.49	2035	0.47
1393	r2i1p1_CESM1–CAM5_RCP4.5_018.final.csv	[1861.0, 1883, 1916, 1976, 1993, 2001, 2021, 2035, 2047, 2056, 2067, 2089, 2100.0]	47	132	3	r2i1p1	CESM1–CAM5	RCP4.5	1	2047	2035	2056	44	12.7662	0.226808	100	2047	0.91	2044	0.06
1394	r2i1p1_CESM1–CAM5_RCP4.5_018.final.csv	[1861.0, 1883, 1916, 1976, 1993, 2001, 2021, 2035, 2047, 2056, 2067, 2089, 2100.0]	47	132	3	r2i1p1	CESM1–CAM5	RCP4.5	1	2056	2047	2067	100	14.817	0.288846	100	2056	0.93	2057	0.07
1395	r2i1p1_CESM1–CAM5_RCP4.5_018.final.csv	[1861.0, 1883, 1916, 1976, 1993, 2001, 2021, 2035, 2047, 2056, 2067, 2089, 2100.0]	47	132	3	r2i1p1	CESM1–CAM5	RCP4.5	1	2067	2056	2089	85	23.3732	0.307776	100	2067	1	0	0
1396	r2i1p1_CESM1–CAM5_RCP4.5_018.final.csv	[1861.0, 1883, 1916, 1976, 1993, 2001, 2021, 2035, 2047, 2056, 2067, 2089, 2100.0]	47	132	3	r2i1p1	CESM1–CAM5	RCP4.5	1	2089	2067	2100	85	18.461	0.266399	85	2089	0.55	2088	0.44
1397	r2i1p1_CESM1–CAM5_RCP4.5_018.final.csv	[1861.0, 1883, 1916, 1976, 1993, 2001, 2021, 2034, 2047, 2056, 2067, 2089, 2100.0]	47	133	4	r2i1p1	CESM1–CAM5	RCP4.5	2	1883	1861	1916	100	28.3027	–0.226955487758	100	1883	1	0	0
1398	r2i1p1_CESM1–CAM5_RCP4.5_018.final.csv	[1861.0, 1883, 1916, 1976, 1993, 2001, 2021, 2034, 2047, 2056, 2067, 2089, 2100.0]	47	133	4	r2i1p1	CESM1–CAM5	RCP4.5	2	1916	1883	1976	100	53.8645	0.251105	100	1916	0.98	1915	0.02
1399	r2i1p1_CESM1–CAM5_RCP4.5_018.final.csv	[1861.0, 1883, 1916, 1976, 1993, 2001, 2021, 2034, 2047, 2056, 2067, 2089, 2100.0]	47	133	4	r2i1p1	CESM1–CAM5	RCP4.5	2	1976	1916	1993	100	31.1396	0.189763	100	1976	0.84	1977	0.16
1400	r2i1p1_CESM1–CAM5_RCP4.5_018.final.csv	[1861.0, 1883, 1916, 1976, 1993, 2001, 2021, 2034, 2047, 2056, 2067, 2089, 2100.0]	47	133	4	r2i1p1	CESM1–CAM5	RCP4.5	2	1993	1976	2001	99	14.697	0.232328	100	1993	0.69	1994	0.31
1401	r2i1p1_CESM1–CAM5_RCP4.5_018.final.csv	[1861.0, 1883, 1916, 1976, 1993, 2001, 2021, 2034, 2047, 2056, 2067, 2089, 2100.0]	47	133	4	r2i1p1	CESM1–CAM5	RCP4.5	2	2001	1993	2021	4	16.1437	0.367478	99	2002	0.32	2006	0.3
1402	r2i1p1_CESM1–CAM5_RCP4.5_018.final.csv	[1861.0, 1883, 1916, 1976, 1993, 2001, 2021, 2034, 2047, 2056, 2067, 2089, 2100.0]	47	133	4	r2i1p1	CESM1–CAM5	RCP4.5	2	2021	2001	2034	3	23.0481	0.505311	5	2021	0.75	2020	0.13
1403	r2i1p1_CESM1–CAM5_RCP4.5_018.final.csv	[1861.0, 1883, 1916, 1976, 1993, 2001, 2021, 2034, 2047, 2056, 2067, 2089, 2100.0]	47	133	4	r2i1p1	CESM1–CAM5	RCP4.5	2	2034	2021	2047	4	17.7838	0.373155	4	2034	0.49	2035	0.47
1404	r2i1p1_CESM1–CAM5_RCP4.5_018.final.csv	[1861.0, 1883, 1916, 1976, 1993, 2001, 2021, 2034, 2047, 2056, 2067, 2089, 2100.0]	47	133	4	r2i1p1	CESM1–CAM5	RCP4.5	2	2047	2034	2056	4	13.2232	0.243373	100	2047	0.82	2044	0.09
1405	r2i1p1_CESM1–CAM5_RCP4.5_018.final.csv	[1861.0, 1883, 1916, 1976, 1993, 2001, 2021, 2034, 2047, 2056, 2067, 2089, 2100.0]	47	133	4	r2i1p1	CESM1–CAM5	RCP4.5	2	2056	2047	2067	100	14.817	0.288846	100	2056	0.93	2057	0.07
1406	r2i1p1_CESM1–CAM5_RCP4.5_018.final.csv	[1861.0, 1883, 1916, 1976, 1993, 2001, 2021, 2034, 2047, 2056, 2067, 2089, 2100.0]	47	133	4	r2i1p1	CESM1–CAM5	RCP4.5	2	2067	2056	2089	85	23.3732	0.307776	100	2067	1	0	0
1407	r2i1p1_CESM1–CAM5_RCP4.5_018.final.csv	[1861.0, 1883, 1916, 1976, 1993, 2001, 2021, 2034, 2047, 2056, 2067, 2089, 2100.0]	47	133	4	r2i1p1	CESM1–CAM5	RCP4.5	2	2089	2067	2100	85	18.461	0.266399	85	2089	0.55	2088	0.44
1408	r2i1p1_CESM1–CAM5_RCP4.5_018.final.csv	[1861.0, 1883, 1916, 1976, 1993, 2002, 2021, 2034, 2047, 2056, 2067, 2089, 2100.0]	47	134	5	r2i1p1	CESM1–CAM5	RCP4.5	1	1883	1861	1916	100	28.3027	–0.226955487758	100	1883	1	0	0
1409	r2i1p1_CESM1–CAM5_RCP4.5_018.final.csv	[1861.0, 1883, 1916, 1976, 1993, 2002, 2021, 2034, 2047, 2056, 2067, 2089, 2100.0]	47	134	5	r2i1p1	CESM1–CAM5	RCP4.5	1	1916	1883	1976	100	53.8645	0.251105	100	1916	0.98	1915	0.02
1410	r2i1p1_CESM1–CAM5_RCP4.5_018.final.csv	[1861.0, 1883, 1916, 1976, 1993, 2002, 2021, 2034, 2047, 2056, 2067, 2089, 2100.0]	47	134	5	r2i1p1	CESM1–CAM5	RCP4.5	1	1976	1916	1993	100	31.1396	0.189763	100	1976	0.84	1977	0.16
1411	r2i1p1_CESM1–CAM5_RCP4.5_018.final.csv	[1861.0, 1883, 1916, 1976, 1993, 2002, 2021, 2034, 2047, 2056, 2067, 2089, 2100.0]	47	134	5	r2i1p1	CESM1–CAM5	RCP4.5	1	1993	1976	2002	1	15.922	0.251049	100	1993	0.49	1994	0.49
1412	r2i1p1_CESM1–CAM5_RCP4.5_018.final.csv	[1861.0, 1883, 1916, 1976, 1993, 2002, 2021, 2034, 2047, 2056, 2067, 2089, 2100.0]	47	134	5	r2i1p1	CESM1–CAM5	RCP4.5	1	2002	1993	2021	1	16.1437	0.367478	1	2002	0.32	2006	0.3
1413	r2i1p1_CESM1–CAM5_RCP4.5_018.final.csv	[1861.0, 1883, 1916, 1976, 1993, 2002, 2021, 2034, 2047, 2056, 2067, 2089, 2100.0]	47	134	5	r2i1p1	CESM1–CAM5	RCP4.5	1	2021	2002	2034	1	22.2505	0.493528	5	2021	0.83	2020	0.12
1414	r2i1p1_CESM1–CAM5_RCP4.5_018.final.csv	[1861.0, 1883, 1916, 1976, 1993, 2002, 2021, 2034, 2047, 2056, 2067, 2089, 2100.0]	47	134	5	r2i1p1	CESM1–CAM5	RCP4.5	1	2034	2021	2047	4	17.7838	0.373155	4	2034	0.49	2035	0.47
1415	r2i1p1_CESM1–CAM5_RCP4.5_018.final.csv	[1861.0, 1883, 1916, 1976, 1993, 2002, 2021, 2034, 2047, 2056, 2067, 2089, 2100.0]	47	134	5	r2i1p1	CESM1–CAM5	RCP4.5	1	2047	2034	2056	4	13.2232	0.243373	100	2047	0.82	2044	0.09
1416	r2i1p1_CESM1–CAM5_RCP4.5_018.final.csv	[1861.0, 1883, 1916, 1976, 1993, 2002, 2021, 2034, 2047, 2056, 2067, 2089, 2100.0]	47	134	5	r2i1p1	CESM1–CAM5	RCP4.5	1	2056	2047	2067	100	14.817	0.288846	100	2056	0.93	2057	0.07
1417	r2i1p1_CESM1–CAM5_RCP4.5_018.final.csv	[1861.0, 1883, 1916, 1976, 1993, 2002, 2021, 2034, 2047, 2056, 2067, 2089, 2100.0]	47	134	5	r2i1p1	CESM1–CAM5	RCP4.5	1	2067	2056	2089	85	23.3732	0.307776	100	2067	1	0	0
1418	r2i1p1_CESM1–CAM5_RCP4.5_018.final.csv	[1861.0, 1883, 1916, 1976, 1993, 2002, 2021, 2034, 2047, 2056, 2067, 2089, 2100.0]	47	134	5	r2i1p1	CESM1–CAM5	RCP4.5	1	2089	2067	2100	85	18.461	0.266399	85	2089	0.55	2088	0.44
1419	r2i1p1_CESM1–CAM5_RCP4.5_018.final.csv	[1861.0, 1883, 1916, 1976, 1993, 2001, 2015, 2025, 2035, 2047, 2056, 2067, 2089, 2100.0]	47	135	6	r2i1p1	CESM1–CAM5	RCP4.5	33	1883	1861	1916	100	28.3027	–0.226955487758	100	1883	1	0	0
1420	r2i1p1_CESM1–CAM5_RCP4.5_018.final.csv	[1861.0, 1883, 1916, 1976, 1993, 2001, 2015, 2025, 2035, 2047, 2056, 2067, 2089, 2100.0]	47	135	6	r2i1p1	CESM1–CAM5	RCP4.5	33	1916	1883	1976	100	53.8645	0.251105	100	1916	0.98	1915	0.02
1421	r2i1p1_CESM1–CAM5_RCP4.5_018.final.csv	[1861.0, 1883, 1916, 1976, 1993, 2001, 2015, 2025, 2035, 2047, 2056, 2067, 2089, 2100.0]	47	135	6	r2i1p1	CESM1–CAM5	RCP4.5	33	1976	1916	1993	100	31.1396	0.189763	100	1976	0.84	1977	0.16
1422	r2i1p1_CESM1–CAM5_RCP4.5_018.final.csv	[1861.0, 1883, 1916, 1976, 1993, 2001, 2015, 2025, 2035, 2047, 2056, 2067, 2089, 2100.0]	47	135	6	r2i1p1	CESM1–CAM5	RCP4.5	33	1993	1976	2001	99	14.697	0.232328	100	1993	0.69	1994	0.31
1423	r2i1p1_CESM1–CAM5_RCP4.5_018.final.csv	[1861.0, 1883, 1916, 1976, 1993, 2001, 2015, 2025, 2035, 2047, 2056, 2067, 2089, 2100.0]	47	135	6	r2i1p1	CESM1–CAM5	RCP4.5	33	2001	1993	2015	95	14.0737	0.288849	99	2001	0.82	2002	0.18
1424	r2i1p1_CESM1–CAM5_RCP4.5_018.final.csv	[1861.0, 1883, 1916, 1976, 1993, 2001, 2015, 2025, 2035, 2047, 2056, 2067, 2089, 2100.0]	47	135	6	r2i1p1	CESM1–CAM5	RCP4.5	33	2015	2001	2025	43	16.1575	0.358625	95	2015	1	0	0
1425	r2i1p1_CESM1–CAM5_RCP4.5_018.final.csv	[1861.0, 1883, 1916, 1976, 1993, 2001, 2015, 2025, 2035, 2047, 2056, 2067, 2089, 2100.0]	47	135	6	r2i1p1	CESM1–CAM5	RCP4.5	33	2025	2015	2035	43	11.809	0.301935	43	2025	0.66	2021	0.18
1426	r2i1p1_CESM1–CAM5_RCP4.5_018.final.csv	[1861.0, 1883, 1916, 1976, 1993, 2001, 2015, 2025, 2035, 2047, 2056, 2067, 2089, 2100.0]	47	135	6	r2i1p1	CESM1–CAM5	RCP4.5	33	2035	2025	2047	43	14.5823	0.321573	44	2035	0.87	2034	0.1
1427	r2i1p1_CESM1–CAM5_RCP4.5_018.final.csv	[1861.0, 1883, 1916, 1976, 1993, 2001, 2015, 2025, 2035, 2047, 2056, 2067, 2089, 2100.0]	47	135	6	r2i1p1	CESM1–CAM5	RCP4.5	33	2047	2035	2056	44	12.7662	0.226808	100	2047	0.91	2044	0.06
1428	r2i1p1_CESM1–CAM5_RCP4.5_018.final.csv	[1861.0, 1883, 1916, 1976, 1993, 2001, 2015, 2025, 2035, 2047, 2056, 2067, 2089, 2100.0]	47	135	6	r2i1p1	CESM1–CAM5	RCP4.5	33	2056	2047	2067	100	14.817	0.288846	100	2056	0.93	2057	0.07
1429	r2i1p1_CESM1–CAM5_RCP4.5_018.final.csv	[1861.0, 1883, 1916, 1976, 1993, 2001, 2015, 2025, 2035, 2047, 2056, 2067, 2089, 2100.0]	47	135	6	r2i1p1	CESM1–CAM5	RCP4.5	33	2067	2056	2089	85	23.3732	0.307776	100	2067	1	0	0
1430	r2i1p1_CESM1–CAM5_RCP4.5_018.final.csv	[1861.0, 1883, 1916, 1976, 1993, 2001, 2015, 2025, 2035, 2047, 2056, 2067, 2089, 2100.0]	47	135	6	r2i1p1	CESM1–CAM5	RCP4.5	33	2089	2067	2100	85	18.461	0.266399	85	2089	0.55	2088	0.44
1431	r2i1p1_CESM1–CAM5_RCP4.5_018.final.csv	[1861.0, 1883, 1916, 1976, 1993, 2001, 2021, 2034, 2047, 2056, 2067, 2088, 2100.0]	47	136	7	r2i1p1	CESM1–CAM5	RCP4.5	1	1883	1861	1916	100	28.3027	–0.226955487758	100	1883	1	0	0
1432	r2i1p1_CESM1–CAM5_RCP4.5_018.final.csv	[1861.0, 1883, 1916, 1976, 1993, 2001, 2021, 2034, 2047, 2056, 2067, 2088, 2100.0]	47	136	7	r2i1p1	CESM1–CAM5	RCP4.5	1	1916	1883	1976	100	53.8645	0.251105	100	1916	0.98	1915	0.02
1433	r2i1p1_CESM1–CAM5_RCP4.5_018.final.csv	[1861.0, 1883, 1916, 1976, 1993, 2001, 2021, 2034, 2047, 2056, 2067, 2088, 2100.0]	47	136	7	r2i1p1	CESM1–CAM5	RCP4.5	1	1976	1916	1993	100	31.1396	0.189763	100	1976	0.84	1977	0.16
1434	r2i1p1_CESM1–CAM5_RCP4.5_018.final.csv	[1861.0, 1883, 1916, 1976, 1993, 2001, 2021, 2034, 2047, 2056, 2067, 2088, 2100.0]	47	136	7	r2i1p1	CESM1–CAM5	RCP4.5	1	1993	1976	2001	99	14.697	0.232328	100	1993	0.69	1994	0.31
1435	r2i1p1_CESM1–CAM5_RCP4.5_018.final.csv	[1861.0, 1883, 1916, 1976, 1993, 2001, 2021, 2034, 2047, 2056, 2067, 2088, 2100.0]	47	136	7	r2i1p1	CESM1–CAM5	RCP4.5	1	2001	1993	2021	4	16.1437	0.367478	99	2002	0.32	2006	0.3
1436	r2i1p1_CESM1–CAM5_RCP4.5_018.final.csv	[1861.0, 1883, 1916, 1976, 1993, 2001, 2021, 2034, 2047, 2056, 2067, 2088, 2100.0]	47	136	7	r2i1p1	CESM1–CAM5	RCP4.5	1	2021	2001	2034	3	23.0481	0.505311	5	2021	0.75	2020	0.13
1437	r2i1p1_CESM1–CAM5_RCP4.5_018.final.csv	[1861.0, 1883, 1916, 1976, 1993, 2001, 2021, 2034, 2047, 2056, 2067, 2088, 2100.0]	47	136	7	r2i1p1	CESM1–CAM5	RCP4.5	1	2034	2021	2047	4	17.7838	0.373155	4	2034	0.49	2035	0.47
1438	r2i1p1_CESM1–CAM5_RCP4.5_018.final.csv	[1861.0, 1883, 1916, 1976, 1993, 2001, 2021, 2034, 2047, 2056, 2067, 2088, 2100.0]	47	136	7	r2i1p1	CESM1–CAM5	RCP4.5	1	2047	2034	2056	4	13.2232	0.243373	100	2047	0.82	2044	0.09
1439	r2i1p1_CESM1–CAM5_RCP4.5_018.final.csv	[1861.0, 1883, 1916, 1976, 1993, 2001, 2021, 2034, 2047, 2056, 2067, 2088, 2100.0]	47	136	7	r2i1p1	CESM1–CAM5	RCP4.5	1	2056	2047	2067	100	14.817	0.288846	100	2056	0.93	2057	0.07
1440	r2i1p1_CESM1–CAM5_RCP4.5_018.final.csv	[1861.0, 1883, 1916, 1976, 1993, 2001, 2021, 2034, 2047, 2056, 2067, 2088, 2100.0]	47	136	7	r2i1p1	CESM1–CAM5	RCP4.5	1	2067	2056	2088	15	22.6777	0.301189	100	2067	1	0	0
1441	r2i1p1_CESM1–CAM5_RCP4.5_018.final.csv	[1861.0, 1883, 1916, 1976, 1993, 2001, 2021, 2034, 2047, 2056, 2067, 2088, 2100.0]	47	136	7	r2i1p1	CESM1–CAM5	RCP4.5	1	2088	2067	2100	15	18.461	0.266399	15	2089	0.55	2088	0.44
1442	r2i1p1_CESM1–CAM5_RCP4.5_018.final.csv	[1861.0, 1883, 1916, 1976, 1993, 2001, 2015, 2029, 2039, 2047, 2056, 2067, 2089, 2100.0]	47	137	8	r2i1p1	CESM1–CAM5	RCP4.5	48	1883	1861	1916	100	28.3027	–0.226955487758	100	1883	1	0	0
1443	r2i1p1_CESM1–CAM5_RCP4.5_018.final.csv	[1861.0, 1883, 1916, 1976, 1993, 2001, 2015, 2029, 2039, 2047, 2056, 2067, 2089, 2100.0]	47	137	8	r2i1p1	CESM1–CAM5	RCP4.5	48	1916	1883	1976	100	53.8645	0.251105	100	1916	0.98	1915	0.02
1444	r2i1p1_CESM1–CAM5_RCP4.5_018.final.csv	[1861.0, 1883, 1916, 1976, 1993, 2001, 2015, 2029, 2039, 2047, 2056, 2067, 2089, 2100.0]	47	137	8	r2i1p1	CESM1–CAM5	RCP4.5	48	1976	1916	1993	100	31.1396	0.189763	100	1976	0.84	1977	0.16
1445	r2i1p1_CESM1–CAM5_RCP4.5_018.final.csv	[1861.0, 1883, 1916, 1976, 1993, 2001, 2015, 2029, 2039, 2047, 2056, 2067, 2089, 2100.0]	47	137	8	r2i1p1	CESM1–CAM5	RCP4.5	48	1993	1976	2001	99	14.697	0.232328	100	1993	0.69	1994	0.31
1446	r2i1p1_CESM1–CAM5_RCP4.5_018.final.csv	[1861.0, 1883, 1916, 1976, 1993, 2001, 2015, 2029, 2039, 2047, 2056, 2067, 2089, 2100.0]	47	137	8	r2i1p1	CESM1–CAM5	RCP4.5	48	2001	1993	2015	95	14.0737	0.288849	99	2001	0.82	2002	0.18
1447	r2i1p1_CESM1–CAM5_RCP4.5_018.final.csv	[1861.0, 1883, 1916, 1976, 1993, 2001, 2015, 2029, 2039, 2047, 2056, 2067, 2089, 2100.0]	47	137	8	r2i1p1	CESM1–CAM5	RCP4.5	48	2015	2001	2029	52	19.2972	0.413444	95	2015	0.99	2020	0.01
1448	r2i1p1_CESM1–CAM5_RCP4.5_018.final.csv	[1861.0, 1883, 1916, 1976, 1993, 2001, 2015, 2029, 2039, 2047, 2056, 2067, 2089, 2100.0]	47	137	8	r2i1p1	CESM1–CAM5	RCP4.5	48	2029	2015	2039	52	15.9457	0.377191	52	2029	0.99	2025	0.01
1449	r2i1p1_CESM1–CAM5_RCP4.5_018.final.csv	[1861.0, 1883, 1916, 1976, 1993, 2001, 2015, 2029, 2039, 2047, 2056, 2067, 2089, 2100.0]	47	137	8	r2i1p1	CESM1–CAM5	RCP4.5	48	2039	2029	2047	52	12.1543	0.237425	52	2039	0.71	2035	0.23
1450	r2i1p1_CESM1–CAM5_RCP4.5_018.final.csv	[1861.0, 1883, 1916, 1976, 1993, 2001, 2015, 2029, 2039, 2047, 2056, 2067, 2089, 2100.0]	47	137	8	r2i1p1	CESM1–CAM5	RCP4.5	48	2047	2039	2056	52	9.82997	0.17662	100	2047	1	0	0
1451	r2i1p1_CESM1–CAM5_RCP4.5_018.final.csv	[1861.0, 1883, 1916, 1976, 1993, 2001, 2015, 2029, 2039, 2047, 2056, 2067, 2089, 2100.0]	47	137	8	r2i1p1	CESM1–CAM5	RCP4.5	48	2056	2047	2067	100	14.817	0.288846	100	2056	0.93	2057	0.07
1452	r2i1p1_CESM1–CAM5_RCP4.5_018.final.csv	[1861.0, 1883, 1916, 1976, 1993, 2001, 2015, 2029, 2039, 2047, 2056, 2067, 2089, 2100.0]	47	137	8	r2i1p1	CESM1–CAM5	RCP4.5	48	2067	2056	2089	85	23.3732	0.307776	100	2067	1	0	0
1453	r2i1p1_CESM1–CAM5_RCP4.5_018.final.csv	[1861.0, 1883, 1916, 1976, 1993, 2001, 2015, 2029, 2039, 2047, 2056, 2067, 2089, 2100.0]	47	137	8	r2i1p1	CESM1–CAM5	RCP4.5	48	2089	2067	2100	85	18.461	0.266399	85	2089	0.55	2088	0.44
Seq	Source	BreakSet	DatasetNo	SetNo	SetNoInData	Type	Model	Treat	%BreakSet	Year	Predecessor	Successor	%SegmentFound	Ti	Shift	%YearOverall	ModalYear	ModalValue	SecondModalYear	SecondModalValue
1454	r2i1p1_CSIRO–Mk3–6–0_RCP4.5_024.final.csv	[1861.0, 1914, 1998, 2012, 2029, 2038, 2052, 2068, 2100.0]	48	138	1	r2i1p1	CSIRO–Mk3–6–0	RCP4.5	7	1914	1861	1998	100	56.6206	0.242161	100	1914	0.92	1915	0.08
1455	r2i1p1_CSIRO–Mk3–6–0_RCP4.5_024.final.csv	[1861.0, 1914, 1998, 2012, 2029, 2038, 2052, 2068, 2100.0]	48	138	1	r2i1p1	CSIRO–Mk3–6–0	RCP4.5	7	1998	1914	2012	100	59.6034	0.475189	100	1998	0.61	1999	0.39
1456	r2i1p1_CSIRO–Mk3–6–0_RCP4.5_024.final.csv	[1861.0, 1914, 1998, 2012, 2029, 2038, 2052, 2068, 2100.0]	48	138	1	r2i1p1	CSIRO–Mk3–6–0	RCP4.5	7	2012	1998	2029	100	23.5334	0.355965	100	2012	0.97	2013	0.03
1457	r2i1p1_CSIRO–Mk3–6–0_RCP4.5_024.final.csv	[1861.0, 1914, 1998, 2012, 2029, 2038, 2052, 2068, 2100.0]	48	138	1	r2i1p1	CSIRO–Mk3–6–0	RCP4.5	7	2029	2012	2038	100	19.6451	0.385915	100	2029	0.92	2030	0.07
1458	r2i1p1_CSIRO–Mk3–6–0_RCP4.5_024.final.csv	[1861.0, 1914, 1998, 2012, 2029, 2038, 2052, 2068, 2100.0]	48	138	1	r2i1p1	CSIRO–Mk3–6–0	RCP4.5	7	2038	2029	2052	100	18.2157	0.439113	100	2038	0.86	2039	0.12
1459	r2i1p1_CSIRO–Mk3–6–0_RCP4.5_024.final.csv	[1861.0, 1914, 1998, 2012, 2029, 2038, 2052, 2068, 2100.0]	48	138	1	r2i1p1	CSIRO–Mk3–6–0	RCP4.5	7	2052	2038	2068	100	18.8188	0.260169	100	2052	1	0	0
1460	r2i1p1_CSIRO–Mk3–6–0_RCP4.5_024.final.csv	[1861.0, 1914, 1998, 2012, 2029, 2038, 2052, 2068, 2100.0]	48	138	1	r2i1p1	CSIRO–Mk3–6–0	RCP4.5	7	2068	2052	2100	7	33.1077	0.452627	100	2077	0.42	2075	0.38
1461	r2i1p1_CSIRO–Mk3–6–0_RCP4.5_024.final.csv	[1861.0, 1914, 1998, 2012, 2029, 2038, 2052, 2068, 2081, 2100.0]	48	139	2	r2i1p1	CSIRO–Mk3–6–0	RCP4.5	48	1914	1861	1998	100	56.6206	0.242161	100	1914	0.92	1915	0.08
1462	r2i1p1_CSIRO–Mk3–6–0_RCP4.5_024.final.csv	[1861.0, 1914, 1998, 2012, 2029, 2038, 2052, 2068, 2081, 2100.0]	48	139	2	r2i1p1	CSIRO–Mk3–6–0	RCP4.5	48	1998	1914	2012	100	59.6034	0.475189	100	1998	0.61	1999	0.39
1463	r2i1p1_CSIRO–Mk3–6–0_RCP4.5_024.final.csv	[1861.0, 1914, 1998, 2012, 2029, 2038, 2052, 2068, 2081, 2100.0]	48	139	2	r2i1p1	CSIRO–Mk3–6–0	RCP4.5	48	2012	1998	2029	100	23.5334	0.355965	100	2012	0.97	2013	0.03
1464	r2i1p1_CSIRO–Mk3–6–0_RCP4.5_024.final.csv	[1861.0, 1914, 1998, 2012, 2029, 2038, 2052, 2068, 2081, 2100.0]	48	139	2	r2i1p1	CSIRO–Mk3–6–0	RCP4.5	48	2029	2012	2038	100	19.6451	0.385915	100	2029	0.92	2030	0.07
1465	r2i1p1_CSIRO–Mk3–6–0_RCP4.5_024.final.csv	[1861.0, 1914, 1998, 2012, 2029, 2038, 2052, 2068, 2081, 2100.0]	48	139	2	r2i1p1	CSIRO–Mk3–6–0	RCP4.5	48	2038	2029	2052	100	18.2157	0.439113	100	2038	0.86	2039	0.12
1466	r2i1p1_CSIRO–Mk3–6–0_RCP4.5_024.final.csv	[1861.0, 1914, 1998, 2012, 2029, 2038, 2052, 2068, 2081, 2100.0]	48	139	2	r2i1p1	CSIRO–Mk3–6–0	RCP4.5	48	2052	2038	2068	100	18.8188	0.260169	100	2052	1	0	0
1467	r2i1p1_CSIRO–Mk3–6–0_RCP4.5_024.final.csv	[1861.0, 1914, 1998, 2012, 2029, 2038, 2052, 2068, 2081, 2100.0]	48	139	2	r2i1p1	CSIRO–Mk3–6–0	RCP4.5	48	2068	2052	2081	48	20.1088	0.328609	100	2068	0.94	2067	0.06
1468	r2i1p1_CSIRO–Mk3–6–0_RCP4.5_024.final.csv	[1861.0, 1914, 1998, 2012, 2029, 2038, 2052, 2068, 2081, 2100.0]	48	139	2	r2i1p1	CSIRO–Mk3–6–0	RCP4.5	48	2081	2068	2100	48	16.1461	0.254312	48	2081	0.41	2077	0.34
1469	r2i1p1_CSIRO–Mk3–6–0_RCP4.5_024.final.csv	[1861.0, 1914, 1998, 2012, 2029, 2038, 2052, 2068, 2077, 2100.0]	48	140	3	r2i1p1	CSIRO–Mk3–6–0	RCP4.5	45	1914	1861	1998	100	56.6206	0.242161	100	1914	0.92	1915	0.08
1470	r2i1p1_CSIRO–Mk3–6–0_RCP4.5_024.final.csv	[1861.0, 1914, 1998, 2012, 2029, 2038, 2052, 2068, 2077, 2100.0]	48	140	3	r2i1p1	CSIRO–Mk3–6–0	RCP4.5	45	1998	1914	2012	100	59.6034	0.475189	100	1998	0.61	1999	0.39
1471	r2i1p1_CSIRO–Mk3–6–0_RCP4.5_024.final.csv	[1861.0, 1914, 1998, 2012, 2029, 2038, 2052, 2068, 2077, 2100.0]	48	140	3	r2i1p1	CSIRO–Mk3–6–0	RCP4.5	45	2012	1998	2029	100	23.5334	0.355965	100	2012	0.97	2013	0.03
1472	r2i1p1_CSIRO–Mk3–6–0_RCP4.5_024.final.csv	[1861.0, 1914, 1998, 2012, 2029, 2038, 2052, 2068, 2077, 2100.0]	48	140	3	r2i1p1	CSIRO–Mk3–6–0	RCP4.5	45	2029	2012	2038	100	19.6451	0.385915	100	2029	0.92	2030	0.07
1473	r2i1p1_CSIRO–Mk3–6–0_RCP4.5_024.final.csv	[1861.0, 1914, 1998, 2012, 2029, 2038, 2052, 2068, 2077, 2100.0]	48	140	3	r2i1p1	CSIRO–Mk3–6–0	RCP4.5	45	2038	2029	2052	100	18.2157	0.439113	100	2038	0.86	2039	0.12
1474	r2i1p1_CSIRO–Mk3–6–0_RCP4.5_024.final.csv	[1861.0, 1914, 1998, 2012, 2029, 2038, 2052, 2068, 2077, 2100.0]	48	140	3	r2i1p1	CSIRO–Mk3–6–0	RCP4.5	45	2052	2038	2068	100	18.8188	0.260169	100	2052	1	0	0
1475	r2i1p1_CSIRO–Mk3–6–0_RCP4.5_024.final.csv	[1861.0, 1914, 1998, 2012, 2029, 2038, 2052, 2068, 2077, 2100.0]	48	140	3	r2i1p1	CSIRO–Mk3–6–0	RCP4.5	45	2068	2052	2077	45	15.8503	0.281619	100	2068	0.76	2067	0.24
1476	r2i1p1_CSIRO–Mk3–6–0_RCP4.5_024.final.csv	[1861.0, 1914, 1998, 2012, 2029, 2038, 2052, 2068, 2077, 2100.0]	48	140	3	r2i1p1	CSIRO–Mk3–6–0	RCP4.5	45	2077	2068	2100	45	16.1461	0.254312	45	2081	0.41	2077	0.34
Seq	Source	BreakSet	DatasetNo	SetNo	SetNoInData	Type	Model	Treat	%BreakSet	Year	Predecessor	Successor	%SegmentFound	Ti	Shift	%YearOverall	ModalYear	ModalValue	SecondModalYear	SecondModalValue
1477	r2i1p1_EC–EARTH_RCP4.5_034.final.csv	[1861.0, 1915, 1955, 1977, 1998, 2014, 2029, 2040, 2054, 2062, 2093, 2100.0]	49	141	1	r2i1p1	EC–EARTH	RCP4.5	1	1915	1861	1955	100	63.416	0.324901	100	1915	1	0	0
1478	r2i1p1_EC–EARTH_RCP4.5_034.final.csv	[1861.0, 1915, 1955, 1977, 1998, 2014, 2029, 2040, 2054, 2062, 2093, 2100.0]	49	141	1	r2i1p1	EC–EARTH	RCP4.5	1	1955	1915	1977	100	39.085	0.221317	100	1955	0.88	1954	0.11
1479	r2i1p1_EC–EARTH_RCP4.5_034.final.csv	[1861.0, 1915, 1955, 1977, 1998, 2014, 2029, 2040, 2054, 2062, 2093, 2100.0]	49	141	1	r2i1p1	EC–EARTH	RCP4.5	1	1977	1955	1998	100	25.3778	0.220294	100	1977	0.91	1976	0.08
1480	r2i1p1_EC–EARTH_RCP4.5_034.final.csv	[1861.0, 1915, 1955, 1977, 1998, 2014, 2029, 2040, 2054, 2062, 2093, 2100.0]	49	141	1	r2i1p1	EC–EARTH	RCP4.5	1	1998	1977	2014	1	28.748	0.406119	100	1998	0.99	2002	0.01
1481	r2i1p1_EC–EARTH_RCP4.5_034.final.csv	[1861.0, 1915, 1955, 1977, 1998, 2014, 2029, 2040, 2054, 2062, 2093, 2100.0]	49	141	1	r2i1p1	EC–EARTH	RCP4.5	1	2014	1998	2029	1	21.717	0.306579	1	2013	0.58	2014	0.41
1482	r2i1p1_EC–EARTH_RCP4.5_034.final.csv	[1861.0, 1915, 1955, 1977, 1998, 2014, 2029, 2040, 2054, 2062, 2093, 2100.0]	49	141	1	r2i1p1	EC–EARTH	RCP4.5	1	2029	2014	2040	1	20.4149	0.371617	100	2029	0.95	2027	0.04
1483	r2i1p1_EC–EARTH_RCP4.5_034.final.csv	[1861.0, 1915, 1955, 1977, 1998, 2014, 2029, 2040, 2054, 2062, 2093, 2100.0]	49	141	1	r2i1p1	EC–EARTH	RCP4.5	1	2040	2029	2054	100	18.3032	0.26973	100	2040	1	0	0
1484	r2i1p1_EC–EARTH_RCP4.5_034.final.csv	[1861.0, 1915, 1955, 1977, 1998, 2014, 2029, 2040, 2054, 2062, 2093, 2100.0]	49	141	1	r2i1p1	EC–EARTH	RCP4.5	1	2054	2040	2062	100	14.7824	0.230658	100	2054	0.94	2055	0.06
1485	r2i1p1_EC–EARTH_RCP4.5_034.final.csv	[1861.0, 1915, 1955, 1977, 1998, 2014, 2029, 2040, 2054, 2062, 2093, 2100.0]	49	141	1	r2i1p1	EC–EARTH	RCP4.5	1	2062	2054	2093	100	20.409	0.264013	100	2062	0.61	2063	0.23
1486	r2i1p1_EC–EARTH_RCP4.5_034.final.csv	[1861.0, 1915, 1955, 1977, 1998, 2014, 2029, 2040, 2054, 2062, 2093, 2100.0]	49	141	1	r2i1p1	EC–EARTH	RCP4.5	1	2093	2062	2100	100	16.8928	0.254084	100	2093	0.97	2091	0.02
1487	r2i1p1_EC–EARTH_RCP4.5_034.final.csv	[1861.0, 1915, 1955, 1977, 1998, 2013, 2029, 2040, 2054, 2062, 2093, 2100.0]	49	142	2	r2i1p1	EC–EARTH	RCP4.5	99	1915	1861	1955	100	63.416	0.324901	100	1915	1	0	0
1488	r2i1p1_EC–EARTH_RCP4.5_034.final.csv	[1861.0, 1915, 1955, 1977, 1998, 2013, 2029, 2040, 2054, 2062, 2093, 2100.0]	49	142	2	r2i1p1	EC–EARTH	RCP4.5	99	1955	1915	1977	100	39.085	0.221317	100	1955	0.88	1954	0.11
1489	r2i1p1_EC–EARTH_RCP4.5_034.final.csv	[1861.0, 1915, 1955, 1977, 1998, 2013, 2029, 2040, 2054, 2062, 2093, 2100.0]	49	142	2	r2i1p1	EC–EARTH	RCP4.5	99	1977	1955	1998	100	25.3778	0.220294	100	1977	0.91	1976	0.08
1490	r2i1p1_EC–EARTH_RCP4.5_034.final.csv	[1861.0, 1915, 1955, 1977, 1998, 2013, 2029, 2040, 2054, 2062, 2093, 2100.0]	49	142	2	r2i1p1	EC–EARTH	RCP4.5	99	1998	1977	2013	99	27.8717	0.397169	100	1998	1	0	0
1491	r2i1p1_EC–EARTH_RCP4.5_034.final.csv	[1861.0, 1915, 1955, 1977, 1998, 2013, 2029, 2040, 2054, 2062, 2093, 2100.0]	49	142	2	r2i1p1	EC–EARTH	RCP4.5	99	2013	1998	2029	99	21.717	0.306579	99	2013	0.58	2014	0.41
1492	r2i1p1_EC–EARTH_RCP4.5_034.final.csv	[1861.0, 1915, 1955, 1977, 1998, 2013, 2029, 2040, 2054, 2062, 2093, 2100.0]	49	142	2	r2i1p1	EC–EARTH	RCP4.5	99	2029	2013	2040	99	21.0781	0.382153	100	2029	0.99	2027	0.01
1493	r2i1p1_EC–EARTH_RCP4.5_034.final.csv	[1861.0, 1915, 1955, 1977, 1998, 2013, 2029, 2040, 2054, 2062, 2093, 2100.0]	49	142	2	r2i1p1	EC–EARTH	RCP4.5	99	2040	2029	2054	100	18.3032	0.26973	100	2040	1	0	0
1494	r2i1p1_EC–EARTH_RCP4.5_034.final.csv	[1861.0, 1915, 1955, 1977, 1998, 2013, 2029, 2040, 2054, 2062, 2093, 2100.0]	49	142	2	r2i1p1	EC–EARTH	RCP4.5	99	2054	2040	2062	100	14.7824	0.230658	100	2054	0.94	2055	0.06
1495	r2i1p1_EC–EARTH_RCP4.5_034.final.csv	[1861.0, 1915, 1955, 1977, 1998, 2013, 2029, 2040, 2054, 2062, 2093, 2100.0]	49	142	2	r2i1p1	EC–EARTH	RCP4.5	99	2062	2054	2093	100	20.409	0.264013	100	2062	0.61	2063	0.23
1496	r2i1p1_EC–EARTH_RCP4.5_034.final.csv	[1861.0, 1915, 1955, 1977, 1998, 2013, 2029, 2040, 2054, 2062, 2093, 2100.0]	49	142	2	r2i1p1	EC–EARTH	RCP4.5	99	2093	2062	2100	100	16.8928	0.254084	100	2093	0.97	2091	0.02
Seq	Source	BreakSet	DatasetNo	SetNo	SetNoInData	Type	Model	Treat	%BreakSet	Year	Predecessor	Successor	%SegmentFound	Ti	Shift	%YearOverall	ModalYear	ModalValue	SecondModalYear	SecondModalValue
1497	r2i1p1_FIO–ESM_RCP4.5_042.final.csv	[1861.0, 1916, 1957, 1975, 1989, 2002, 2018, 2028, 2042, 2100.0]	50	143	1	r2i1p1	FIO–ESM	RCP4.5	100	1916	1861	1957	100	31.1446	0.150062	100	1916	0.96	1904	0.02
1498	r2i1p1_FIO–ESM_RCP4.5_042.final.csv	[1861.0, 1916, 1957, 1975, 1989, 2002, 2018, 2028, 2042, 2100.0]	50	143	1	r2i1p1	FIO–ESM	RCP4.5	100	1957	1916	1975	100	13.8449	0.124966	100	1957	0.96	1954	0.03
1499	r2i1p1_FIO–ESM_RCP4.5_042.final.csv	[1861.0, 1916, 1957, 1975, 1989, 2002, 2018, 2028, 2042, 2100.0]	50	143	1	r2i1p1	FIO–ESM	RCP4.5	100	1975	1957	1989	100	20.9355	0.26337	100	1975	1	0	0
1500	r2i1p1_FIO–ESM_RCP4.5_042.final.csv	[1861.0, 1916, 1957, 1975, 1989, 2002, 2018, 2028, 2042, 2100.0]	50	143	1	r2i1p1	FIO–ESM	RCP4.5	100	1989	1975	2002	100	15.4489	0.222573	100	1989	1	0	0
1501	r2i1p1_FIO–ESM_RCP4.5_042.final.csv	[1861.0, 1916, 1957, 1975, 1989, 2002, 2018, 2028, 2042, 2100.0]	50	143	1	r2i1p1	FIO–ESM	RCP4.5	100	2002	1989	2018	100	19.6227	0.277716	100	2002	0.96	2001	0.03
1502	r2i1p1_FIO–ESM_RCP4.5_042.final.csv	[1861.0, 1916, 1957, 1975, 1989, 2002, 2018, 2028, 2042, 2100.0]	50	143	1	r2i1p1	FIO–ESM	RCP4.5	100	2018	2002	2028	100	16.5232	0.268009	100	2018	0.95	2014	0.04
1503	r2i1p1_FIO–ESM_RCP4.5_042.final.csv	[1861.0, 1916, 1957, 1975, 1989, 2002, 2018, 2028, 2042, 2100.0]	50	143	1	r2i1p1	FIO–ESM	RCP4.5	100	2028	2018	2042	100	12.3392	0.187467	100	2028	0.92	2027	0.07
1504	r2i1p1_FIO–ESM_RCP4.5_042.final.csv	[1861.0, 1916, 1957, 1975, 1989, 2002, 2018, 2028, 2042, 2100.0]	50	143	1	r2i1p1	FIO–ESM	RCP4.5	100	2042	2028	2100	100	43.8478	0.359927	100	2042	1	0	0
Seq	Source	BreakSet	DatasetNo	SetNo	SetNoInData	Type	Model	Treat	%BreakSet	Year	Predecessor	Successor	%SegmentFound	Ti	Shift	%YearOverall	ModalYear	ModalValue	SecondModalYear	SecondModalValue
1505	r2i1p1_GISS–E2–H_RCP4.5_048.final.csv	[1861.0, 1866, 1883, 1892, 1917, 1934, 1969, 1995, 2007, 2024, 2034, 2044, 2054, 2069, 2100.0]	51	144	1	r2i1p1	GISS–E2–H	RCP4.5	85	1866	1861	1883	100	12.3515	0.124837	100	1866	1	0	0
1506	r2i1p1_GISS–E2–H_RCP4.5_048.final.csv	[1861.0, 1866, 1883, 1892, 1917, 1934, 1969, 1995, 2007, 2024, 2034, 2044, 2054, 2069, 2100.0]	51	144	1	r2i1p1	GISS–E2–H	RCP4.5	85	1883	1866	1892	100	15.3114	–0.195445689684	100	1883	1	0	0
1507	r2i1p1_GISS–E2–H_RCP4.5_048.final.csv	[1861.0, 1866, 1883, 1892, 1917, 1934, 1969, 1995, 2007, 2024, 2034, 2044, 2054, 2069, 2100.0]	51	144	1	r2i1p1	GISS–E2–H	RCP4.5	85	1892	1883	1917	100	22.225	0.235946	100	1892	0.87	1893	0.13
1508	r2i1p1_GISS–E2–H_RCP4.5_048.final.csv	[1861.0, 1866, 1883, 1892, 1917, 1934, 1969, 1995, 2007, 2024, 2034, 2044, 2054, 2069, 2100.0]	51	144	1	r2i1p1	GISS–E2–H	RCP4.5	85	1917	1892	1934	100	25.5531	0.139957	100	1917	0.97	1916	0.02
1509	r2i1p1_GISS–E2–H_RCP4.5_048.final.csv	[1861.0, 1866, 1883, 1892, 1917, 1934, 1969, 1995, 2007, 2024, 2034, 2044, 2054, 2069, 2100.0]	51	144	1	r2i1p1	GISS–E2–H	RCP4.5	85	1934	1917	1969	100	30.151	0.148793	100	1934	0.97	1936	0.02
1510	r2i1p1_GISS–E2–H_RCP4.5_048.final.csv	[1861.0, 1866, 1883, 1892, 1917, 1934, 1969, 1995, 2007, 2024, 2034, 2044, 2054, 2069, 2100.0]	51	144	1	r2i1p1	GISS–E2–H	RCP4.5	85	1969	1934	1995	100	35.4069	0.219575	100	1970	0.87	1969	0.13
1511	r2i1p1_GISS–E2–H_RCP4.5_048.final.csv	[1861.0, 1866, 1883, 1892, 1917, 1934, 1969, 1995, 2007, 2024, 2034, 2044, 2054, 2069, 2100.0]	51	144	1	r2i1p1	GISS–E2–H	RCP4.5	85	1995	1969	2007	100	26.0864	0.387535	100	1995	0.95	1996	0.04
1512	r2i1p1_GISS–E2–H_RCP4.5_048.final.csv	[1861.0, 1866, 1883, 1892, 1917, 1934, 1969, 1995, 2007, 2024, 2034, 2044, 2054, 2069, 2100.0]	51	144	1	r2i1p1	GISS–E2–H	RCP4.5	85	2007	1995	2024	100	21.0795	0.320483	100	2007	0.96	2008	0.02
1513	r2i1p1_GISS–E2–H_RCP4.5_048.final.csv	[1861.0, 1866, 1883, 1892, 1917, 1934, 1969, 1995, 2007, 2024, 2034, 2044, 2054, 2069, 2100.0]	51	144	1	r2i1p1	GISS–E2–H	RCP4.5	85	2024	2007	2034	100	20.0152	0.273926	100	2024	1	0	0
1514	r2i1p1_GISS–E2–H_RCP4.5_048.final.csv	[1861.0, 1866, 1883, 1892, 1917, 1934, 1969, 1995, 2007, 2024, 2034, 2044, 2054, 2069, 2100.0]	51	144	1	r2i1p1	GISS–E2–H	RCP4.5	85	2034	2024	2044	100	14.6396	0.223938	100	2034	0.8	2031	0.13
1515	r2i1p1_GISS–E2–H_RCP4.5_048.final.csv	[1861.0, 1866, 1883, 1892, 1917, 1934, 1969, 1995, 2007, 2024, 2034, 2044, 2054, 2069, 2100.0]	51	144	1	r2i1p1	GISS–E2–H	RCP4.5	85	2044	2034	2054	85	13.8133	0.150864	100	2044	0.98	2040	0.01
1516	r2i1p1_GISS–E2–H_RCP4.5_048.final.csv	[1861.0, 1866, 1883, 1892, 1917, 1934, 1969, 1995, 2007, 2024, 2034, 2044, 2054, 2069, 2100.0]	51	144	1	r2i1p1	GISS–E2–H	RCP4.5	85	2054	2044	2069	85	17.6463	0.16408	85	2054	0.52	2055	0.35
1517	r2i1p1_GISS–E2–H_RCP4.5_048.final.csv	[1861.0, 1866, 1883, 1892, 1917, 1934, 1969, 1995, 2007, 2024, 2034, 2044, 2054, 2069, 2100.0]	51	144	1	r2i1p1	GISS–E2–H	RCP4.5	85	2069	2054	2100	85	31.476	0.156364	100	2069	0.98	2070	0.01
1518	r2i1p1_GISS–E2–H_RCP4.5_048.final.csv	[1861.0, 1866, 1883, 1892, 1917, 1934, 1969, 1995, 2007, 2024, 2034, 2044, 2055, 2069, 2100.0]	51	145	2	r2i1p1	GISS–E2–H	RCP4.5	15	1866	1861	1883	100	12.3515	0.124837	100	1866	1	0	0
1519	r2i1p1_GISS–E2–H_RCP4.5_048.final.csv	[1861.0, 1866, 1883, 1892, 1917, 1934, 1969, 1995, 2007, 2024, 2034, 2044, 2055, 2069, 2100.0]	51	145	2	r2i1p1	GISS–E2–H	RCP4.5	15	1883	1866	1892	100	15.3114	–0.195445689684	100	1883	1	0	0
1520	r2i1p1_GISS–E2–H_RCP4.5_048.final.csv	[1861.0, 1866, 1883, 1892, 1917, 1934, 1969, 1995, 2007, 2024, 2034, 2044, 2055, 2069, 2100.0]	51	145	2	r2i1p1	GISS–E2–H	RCP4.5	15	1892	1883	1917	100	22.225	0.235946	100	1892	0.87	1893	0.13
1521	r2i1p1_GISS–E2–H_RCP4.5_048.final.csv	[1861.0, 1866, 1883, 1892, 1917, 1934, 1969, 1995, 2007, 2024, 2034, 2044, 2055, 2069, 2100.0]	51	145	2	r2i1p1	GISS–E2–H	RCP4.5	15	1917	1892	1934	100	25.5531	0.139957	100	1917	0.97	1916	0.02
1522	r2i1p1_GISS–E2–H_RCP4.5_048.final.csv	[1861.0, 1866, 1883, 1892, 1917, 1934, 1969, 1995, 2007, 2024, 2034, 2044, 2055, 2069, 2100.0]	51	145	2	r2i1p1	GISS–E2–H	RCP4.5	15	1934	1917	1969	100	30.151	0.148793	100	1934	0.97	1936	0.02
1523	r2i1p1_GISS–E2–H_RCP4.5_048.final.csv	[1861.0, 1866, 1883, 1892, 1917, 1934, 1969, 1995, 2007, 2024, 2034, 2044, 2055, 2069, 2100.0]	51	145	2	r2i1p1	GISS–E2–H	RCP4.5	15	1969	1934	1995	100	35.4069	0.219575	100	1970	0.87	1969	0.13
1524	r2i1p1_GISS–E2–H_RCP4.5_048.final.csv	[1861.0, 1866, 1883, 1892, 1917, 1934, 1969, 1995, 2007, 2024, 2034, 2044, 2055, 2069, 2100.0]	51	145	2	r2i1p1	GISS–E2–H	RCP4.5	15	1995	1969	2007	100	26.0864	0.387535	100	1995	0.95	1996	0.04
1525	r2i1p1_GISS–E2–H_RCP4.5_048.final.csv	[1861.0, 1866, 1883, 1892, 1917, 1934, 1969, 1995, 2007, 2024, 2034, 2044, 2055, 2069, 2100.0]	51	145	2	r2i1p1	GISS–E2–H	RCP4.5	15	2007	1995	2024	100	21.0795	0.320483	100	2007	0.96	2008	0.02
1526	r2i1p1_GISS–E2–H_RCP4.5_048.final.csv	[1861.0, 1866, 1883, 1892, 1917, 1934, 1969, 1995, 2007, 2024, 2034, 2044, 2055, 2069, 2100.0]	51	145	2	r2i1p1	GISS–E2–H	RCP4.5	15	2024	2007	2034	100	20.0152	0.273926	100	2024	1	0	0
1527	r2i1p1_GISS–E2–H_RCP4.5_048.final.csv	[1861.0, 1866, 1883, 1892, 1917, 1934, 1969, 1995, 2007, 2024, 2034, 2044, 2055, 2069, 2100.0]	51	145	2	r2i1p1	GISS–E2–H	RCP4.5	15	2034	2024	2044	100	14.6396	0.223938	100	2034	0.8	2031	0.13
1528	r2i1p1_GISS–E2–H_RCP4.5_048.final.csv	[1861.0, 1866, 1883, 1892, 1917, 1934, 1969, 1995, 2007, 2024, 2034, 2044, 2055, 2069, 2100.0]	51	145	2	r2i1p1	GISS–E2–H	RCP4.5	15	2044	2034	2055	15	14.6861	0.160068	100	2044	0.97	2041	0.02
1529	r2i1p1_GISS–E2–H_RCP4.5_048.final.csv	[1861.0, 1866, 1883, 1892, 1917, 1934, 1969, 1995, 2007, 2024, 2034, 2044, 2055, 2069, 2100.0]	51	145	2	r2i1p1	GISS–E2–H	RCP4.5	15	2055	2044	2069	15	17.6463	0.16408	15	2054	0.52	2055	0.35
1530	r2i1p1_GISS–E2–H_RCP4.5_048.final.csv	[1861.0, 1866, 1883, 1892, 1917, 1934, 1969, 1995, 2007, 2024, 2034, 2044, 2055, 2069, 2100.0]	51	145	2	r2i1p1	GISS–E2–H	RCP4.5	15	2069	2055	2100	15	30.3091	0.151052	100	2069	1	0	0
Seq	Source	BreakSet	DatasetNo	SetNo	SetNoInData	Type	Model	Treat	%BreakSet	Year	Predecessor	Successor	%SegmentFound	Ti	Shift	%YearOverall	ModalYear	ModalValue	SecondModalYear	SecondModalValue
1531	r2i1p1_GISS–E2–R_RCP4.5_064.final.csv	[1861.0, 1883, 1893, 1926, 1971, 1995, 2009, 2020, 2034, 2054, 2083, 2100.0]	52	146	1	r2i1p1	GISS–E2–R	RCP4.5	9	1883	1861	1893	100	11.0625	–0.136958858373	100	1883	1	0	0
1532	r2i1p1_GISS–E2–R_RCP4.5_064.final.csv	[1861.0, 1883, 1893, 1926, 1971, 1995, 2009, 2020, 2034, 2054, 2083, 2100.0]	52	146	1	r2i1p1	GISS–E2–R	RCP4.5	9	1893	1883	1926	100	24.5897	0.347698	100	1887	0.8	1893	0.11
1533	r2i1p1_GISS–E2–R_RCP4.5_064.final.csv	[1861.0, 1883, 1893, 1926, 1971, 1995, 2009, 2020, 2034, 2054, 2083, 2100.0]	52	146	1	r2i1p1	GISS–E2–R	RCP4.5	9	1926	1893	1971	100	36.0241	0.152228	100	1926	0.99	1933	0.01
1534	r2i1p1_GISS–E2–R_RCP4.5_064.final.csv	[1861.0, 1883, 1893, 1926, 1971, 1995, 2009, 2020, 2034, 2054, 2083, 2100.0]	52	146	1	r2i1p1	GISS–E2–R	RCP4.5	9	1971	1926	1995	100	36.5198	0.218161	100	1971	0.96	1973	0.04
1535	r2i1p1_GISS–E2–R_RCP4.5_064.final.csv	[1861.0, 1883, 1893, 1926, 1971, 1995, 2009, 2020, 2034, 2054, 2083, 2100.0]	52	146	1	r2i1p1	GISS–E2–R	RCP4.5	9	1995	1971	2009	9	29.4341	0.402669	100	1995	0.62	1994	0.36
1536	r2i1p1_GISS–E2–R_RCP4.5_064.final.csv	[1861.0, 1883, 1893, 1926, 1971, 1995, 2009, 2020, 2034, 2054, 2083, 2100.0]	52	146	1	r2i1p1	GISS–E2–R	RCP4.5	9	2009	1995	2020	9	13.7042	0.156012	9	2009	0.39	2010	0.39
1537	r2i1p1_GISS–E2–R_RCP4.5_064.final.csv	[1861.0, 1883, 1893, 1926, 1971, 1995, 2009, 2020, 2034, 2054, 2083, 2100.0]	52	146	1	r2i1p1	GISS–E2–R	RCP4.5	9	2020	2009	2034	9	17.1196	0.239261	12	2020	0.65	2021	0.29
1538	r2i1p1_GISS–E2–R_RCP4.5_064.final.csv	[1861.0, 1883, 1893, 1926, 1971, 1995, 2009, 2020, 2034, 2054, 2083, 2100.0]	52	146	1	r2i1p1	GISS–E2–R	RCP4.5	9	2034	2020	2054	12	25.6125	0.303865	23	2034	0.8	2035	0.11
1539	r2i1p1_GISS–E2–R_RCP4.5_064.final.csv	[1861.0, 1883, 1893, 1926, 1971, 1995, 2009, 2020, 2034, 2054, 2083, 2100.0]	52	146	1	r2i1p1	GISS–E2–R	RCP4.5	9	2054	2034	2083	13	32.7976	0.168701	93	2054	1	0	0
1540	r2i1p1_GISS–E2–R_RCP4.5_064.final.csv	[1861.0, 1883, 1893, 1926, 1971, 1995, 2009, 2020, 2034, 2054, 2083, 2100.0]	52	146	1	r2i1p1	GISS–E2–R	RCP4.5	9	2083	2054	2100	93	29.838	0.121791	100	2083	1	0	0
1541	r2i1p1_GISS–E2–R_RCP4.5_064.final.csv	[1861.0, 1883, 1893, 1926, 1971, 1995, 2014, 2026, 2036, 2045, 2057, 2083, 2100.0]	52	147	2	r2i1p1	GISS–E2–R	RCP4.5	7	1883	1861	1893	100	11.0625	–0.136958858373	100	1883	1	0	0
1542	r2i1p1_GISS–E2–R_RCP4.5_064.final.csv	[1861.0, 1883, 1893, 1926, 1971, 1995, 2014, 2026, 2036, 2045, 2057, 2083, 2100.0]	52	147	2	r2i1p1	GISS–E2–R	RCP4.5	7	1893	1883	1926	100	24.5897	0.347698	100	1887	0.8	1893	0.11
1543	r2i1p1_GISS–E2–R_RCP4.5_064.final.csv	[1861.0, 1883, 1893, 1926, 1971, 1995, 2014, 2026, 2036, 2045, 2057, 2083, 2100.0]	52	147	2	r2i1p1	GISS–E2–R	RCP4.5	7	1926	1893	1971	100	36.0241	0.152228	100	1926	0.99	1933	0.01
1544	r2i1p1_GISS–E2–R_RCP4.5_064.final.csv	[1861.0, 1883, 1893, 1926, 1971, 1995, 2014, 2026, 2036, 2045, 2057, 2083, 2100.0]	52	147	2	r2i1p1	GISS–E2–R	RCP4.5	7	1971	1926	1995	100	36.5198	0.218161	100	1971	0.96	1973	0.04
1545	r2i1p1_GISS–E2–R_RCP4.5_064.final.csv	[1861.0, 1883, 1893, 1926, 1971, 1995, 2014, 2026, 2036, 2045, 2057, 2083, 2100.0]	52	147	2	r2i1p1	GISS–E2–R	RCP4.5	7	1995	1971	2014	87	34.572	0.431682	100	1995	0.82	1994	0.14
1546	r2i1p1_GISS–E2–R_RCP4.5_064.final.csv	[1861.0, 1883, 1893, 1926, 1971, 1995, 2014, 2026, 2036, 2045, 2057, 2083, 2100.0]	52	147	2	r2i1p1	GISS–E2–R	RCP4.5	7	2014	1995	2026	87	20.0395	0.223965	87	2014	0.69	2011	0.11
1547	r2i1p1_GISS–E2–R_RCP4.5_064.final.csv	[1861.0, 1883, 1893, 1926, 1971, 1995, 2014, 2026, 2036, 2045, 2057, 2083, 2100.0]	52	147	2	r2i1p1	GISS–E2–R	RCP4.5	7	2026	2014	2036	77	15.2053	0.228536	87	2026	0.96	2028	0.02
1548	r2i1p1_GISS–E2–R_RCP4.5_064.final.csv	[1861.0, 1883, 1893, 1926, 1971, 1995, 2014, 2026, 2036, 2045, 2057, 2083, 2100.0]	52	147	2	r2i1p1	GISS–E2–R	RCP4.5	7	2036	2026	2045	7	13.0166	0.195886	77	2034	0.64	2035	0.29
1549	r2i1p1_GISS–E2–R_RCP4.5_064.final.csv	[1861.0, 1883, 1893, 1926, 1971, 1995, 2014, 2026, 2036, 2045, 2057, 2083, 2100.0]	52	147	2	r2i1p1	GISS–E2–R	RCP4.5	7	2045	2036	2057	7	9.24422	0.106106	7	2043	0.64	2044	0.25
1550	r2i1p1_GISS–E2–R_RCP4.5_064.final.csv	[1861.0, 1883, 1893, 1926, 1971, 1995, 2014, 2026, 2036, 2045, 2057, 2083, 2100.0]	52	147	2	r2i1p1	GISS–E2–R	RCP4.5	7	2057	2045	2083	7	21.9437	0.105578	7	2057	0.85	2054	0.15
1551	r2i1p1_GISS–E2–R_RCP4.5_064.final.csv	[1861.0, 1883, 1893, 1926, 1971, 1995, 2014, 2026, 2036, 2045, 2057, 2083, 2100.0]	52	147	2	r2i1p1	GISS–E2–R	RCP4.5	7	2083	2057	2100	7	28.3276	0.115443	100	2083	1	0	0
1552	r2i1p1_GISS–E2–R_RCP4.5_064.final.csv	[1861.0, 1883, 1893, 1926, 1971, 1995, 2014, 2026, 2036, 2054, 2083, 2100.0]	52	148	3	r2i1p1	GISS–E2–R	RCP4.5	70	1883	1861	1893	100	11.0625	–0.136958858373	100	1883	1	0	0
1553	r2i1p1_GISS–E2–R_RCP4.5_064.final.csv	[1861.0, 1883, 1893, 1926, 1971, 1995, 2014, 2026, 2036, 2054, 2083, 2100.0]	52	148	3	r2i1p1	GISS–E2–R	RCP4.5	70	1893	1883	1926	100	24.5897	0.347698	100	1887	0.8	1893	0.11
1554	r2i1p1_GISS–E2–R_RCP4.5_064.final.csv	[1861.0, 1883, 1893, 1926, 1971, 1995, 2014, 2026, 2036, 2054, 2083, 2100.0]	52	148	3	r2i1p1	GISS–E2–R	RCP4.5	70	1926	1893	1971	100	36.0241	0.152228	100	1926	0.99	1933	0.01
1555	r2i1p1_GISS–E2–R_RCP4.5_064.final.csv	[1861.0, 1883, 1893, 1926, 1971, 1995, 2014, 2026, 2036, 2054, 2083, 2100.0]	52	148	3	r2i1p1	GISS–E2–R	RCP4.5	70	1971	1926	1995	100	36.5198	0.218161	100	1971	0.96	1973	0.04
1556	r2i1p1_GISS–E2–R_RCP4.5_064.final.csv	[1861.0, 1883, 1893, 1926, 1971, 1995, 2014, 2026, 2036, 2054, 2083, 2100.0]	52	148	3	r2i1p1	GISS–E2–R	RCP4.5	70	1995	1971	2014	87	34.572	0.431682	100	1995	0.82	1994	0.14
1557	r2i1p1_GISS–E2–R_RCP4.5_064.final.csv	[1861.0, 1883, 1893, 1926, 1971, 1995, 2014, 2026, 2036, 2054, 2083, 2100.0]	52	148	3	r2i1p1	GISS–E2–R	RCP4.5	70	2014	1995	2026	87	20.0395	0.223965	87	2014	0.69	2011	0.11
1558	r2i1p1_GISS–E2–R_RCP4.5_064.final.csv	[1861.0, 1883, 1893, 1926, 1971, 1995, 2014, 2026, 2036, 2054, 2083, 2100.0]	52	148	3	r2i1p1	GISS–E2–R	RCP4.5	70	2026	2014	2036	77	15.2053	0.228536	87	2026	0.96	2028	0.02
1559	r2i1p1_GISS–E2–R_RCP4.5_064.final.csv	[1861.0, 1883, 1893, 1926, 1971, 1995, 2014, 2026, 2036, 2054, 2083, 2100.0]	52	148	3	r2i1p1	GISS–E2–R	RCP4.5	70	2036	2026	2054	70	19.6238	0.230984	77	2036	0.73	2035	0.22
1560	r2i1p1_GISS–E2–R_RCP4.5_064.final.csv	[1861.0, 1883, 1893, 1926, 1971, 1995, 2014, 2026, 2036, 2054, 2083, 2100.0]	52	148	3	r2i1p1	GISS–E2–R	RCP4.5	70	2054	2036	2083	70	31.6447	0.15523	93	2054	1	0	0
1561	r2i1p1_GISS–E2–R_RCP4.5_064.final.csv	[1861.0, 1883, 1893, 1926, 1971, 1995, 2014, 2026, 2036, 2054, 2083, 2100.0]	52	148	3	r2i1p1	GISS–E2–R	RCP4.5	70	2083	2054	2100	93	29.838	0.121791	100	2083	1	0	0
1562	r2i1p1_GISS–E2–R_RCP4.5_064.final.csv	[1861.0, 1883, 1893, 1926, 1971, 1995, 2010, 2021, 2034, 2054, 2083, 2100.0]	52	149	4	r2i1p1	GISS–E2–R	RCP4.5	1	1883	1861	1893	100	11.0625	–0.136958858373	100	1883	1	0	0
1563	r2i1p1_GISS–E2–R_RCP4.5_064.final.csv	[1861.0, 1883, 1893, 1926, 1971, 1995, 2010, 2021, 2034, 2054, 2083, 2100.0]	52	149	4	r2i1p1	GISS–E2–R	RCP4.5	1	1893	1883	1926	100	24.5897	0.347698	100	1887	0.8	1893	0.11
1564	r2i1p1_GISS–E2–R_RCP4.5_064.final.csv	[1861.0, 1883, 1893, 1926, 1971, 1995, 2010, 2021, 2034, 2054, 2083, 2100.0]	52	149	4	r2i1p1	GISS–E2–R	RCP4.5	1	1926	1893	1971	100	36.0241	0.152228	100	1926	0.99	1933	0.01
1565	r2i1p1_GISS–E2–R_RCP4.5_064.final.csv	[1861.0, 1883, 1893, 1926, 1971, 1995, 2010, 2021, 2034, 2054, 2083, 2100.0]	52	149	4	r2i1p1	GISS–E2–R	RCP4.5	1	1971	1926	1995	100	36.5198	0.218161	100	1971	0.96	1973	0.04
1566	r2i1p1_GISS–E2–R_RCP4.5_064.final.csv	[1861.0, 1883, 1893, 1926, 1971, 1995, 2010, 2021, 2034, 2054, 2083, 2100.0]	52	149	4	r2i1p1	GISS–E2–R	RCP4.5	1	1995	1971	2010	4	30.4835	0.408122	100	1995	0.71	1994	0.28
1567	r2i1p1_GISS–E2–R_RCP4.5_064.final.csv	[1861.0, 1883, 1893, 1926, 1971, 1995, 2010, 2021, 2034, 2054, 2083, 2100.0]	52	149	4	r2i1p1	GISS–E2–R	RCP4.5	1	2010	1995	2021	1	14.6317	0.170482	4	2010	0.44	2009	0.31
1568	r2i1p1_GISS–E2–R_RCP4.5_064.final.csv	[1861.0, 1883, 1893, 1926, 1971, 1995, 2010, 2021, 2034, 2054, 2083, 2100.0]	52	149	4	r2i1p1	GISS–E2–R	RCP4.5	1	2021	2010	2034	1	16.26	0.232331	1	2020	0.45	2021	0.31
1569	r2i1p1_GISS–E2–R_RCP4.5_064.final.csv	[1861.0, 1883, 1893, 1926, 1971, 1995, 2010, 2021, 2034, 2054, 2083, 2100.0]	52	149	4	r2i1p1	GISS–E2–R	RCP4.5	1	2034	2021	2054	1	24.6179	0.295911	23	2034	0.75	2035	0.2
1570	r2i1p1_GISS–E2–R_RCP4.5_064.final.csv	[1861.0, 1883, 1893, 1926, 1971, 1995, 2010, 2021, 2034, 2054, 2083, 2100.0]	52	149	4	r2i1p1	GISS–E2–R	RCP4.5	1	2054	2034	2083	13	32.7976	0.168701	93	2054	1	0	0
1571	r2i1p1_GISS–E2–R_RCP4.5_064.final.csv	[1861.0, 1883, 1893, 1926, 1971, 1995, 2010, 2021, 2034, 2054, 2083, 2100.0]	52	149	4	r2i1p1	GISS–E2–R	RCP4.5	1	2083	2054	2100	93	29.838	0.121791	100	2083	1	0	0
1572	r2i1p1_GISS–E2–R_RCP4.5_064.final.csv	[1861.0, 1883, 1893, 1926, 1971, 1995, 2014, 2026, 2034, 2043, 2054, 2083, 2100.0]	52	150	5	r2i1p1	GISS–E2–R	RCP4.5	10	1883	1861	1893	100	11.0625	–0.136958858373	100	1883	1	0	0
1573	r2i1p1_GISS–E2–R_RCP4.5_064.final.csv	[1861.0, 1883, 1893, 1926, 1971, 1995, 2014, 2026, 2034, 2043, 2054, 2083, 2100.0]	52	150	5	r2i1p1	GISS–E2–R	RCP4.5	10	1893	1883	1926	100	24.5897	0.347698	100	1887	0.8	1893	0.11
1574	r2i1p1_GISS–E2–R_RCP4.5_064.final.csv	[1861.0, 1883, 1893, 1926, 1971, 1995, 2014, 2026, 2034, 2043, 2054, 2083, 2100.0]	52	150	5	r2i1p1	GISS–E2–R	RCP4.5	10	1926	1893	1971	100	36.0241	0.152228	100	1926	0.99	1933	0.01
1575	r2i1p1_GISS–E2–R_RCP4.5_064.final.csv	[1861.0, 1883, 1893, 1926, 1971, 1995, 2014, 2026, 2034, 2043, 2054, 2083, 2100.0]	52	150	5	r2i1p1	GISS–E2–R	RCP4.5	10	1971	1926	1995	100	36.5198	0.218161	100	1971	0.96	1973	0.04
1576	r2i1p1_GISS–E2–R_RCP4.5_064.final.csv	[1861.0, 1883, 1893, 1926, 1971, 1995, 2014, 2026, 2034, 2043, 2054, 2083, 2100.0]	52	150	5	r2i1p1	GISS–E2–R	RCP4.5	10	1995	1971	2014	87	34.572	0.431682	100	1995	0.82	1994	0.14
1577	r2i1p1_GISS–E2–R_RCP4.5_064.final.csv	[1861.0, 1883, 1893, 1926, 1971, 1995, 2014, 2026, 2034, 2043, 2054, 2083, 2100.0]	52	150	5	r2i1p1	GISS–E2–R	RCP4.5	10	2014	1995	2026	87	20.0395	0.223965	87	2014	0.69	2011	0.11
1578	r2i1p1_GISS–E2–R_RCP4.5_064.final.csv	[1861.0, 1883, 1893, 1926, 1971, 1995, 2014, 2026, 2034, 2043, 2054, 2083, 2100.0]	52	150	5	r2i1p1	GISS–E2–R	RCP4.5	10	2026	2014	2034	10	13.3746	0.20661	87	2026	0.89	2021	0.05
1579	r2i1p1_GISS–E2–R_RCP4.5_064.final.csv	[1861.0, 1883, 1893, 1926, 1971, 1995, 2014, 2026, 2034, 2043, 2054, 2083, 2100.0]	52	150	5	r2i1p1	GISS–E2–R	RCP4.5	10	2034	2026	2043	10	11.3224	0.180538	23	2034	0.69	2035	0.23
1580	r2i1p1_GISS–E2–R_RCP4.5_064.final.csv	[1861.0, 1883, 1893, 1926, 1971, 1995, 2014, 2026, 2034, 2043, 2054, 2083, 2100.0]	52	150	5	r2i1p1	GISS–E2–R	RCP4.5	10	2043	2034	2054	10	9.72848	0.108451	10	2043	0.9	2045	0.06
1581	r2i1p1_GISS–E2–R_RCP4.5_064.final.csv	[1861.0, 1883, 1893, 1926, 1971, 1995, 2014, 2026, 2034, 2043, 2054, 2083, 2100.0]	52	150	5	r2i1p1	GISS–E2–R	RCP4.5	10	2054	2043	2083	10	24.8267	0.120626	93	2054	0.69	2057	0.31
1582	r2i1p1_GISS–E2–R_RCP4.5_064.final.csv	[1861.0, 1883, 1893, 1926, 1971, 1995, 2014, 2026, 2034, 2043, 2054, 2083, 2100.0]	52	150	5	r2i1p1	GISS–E2–R	RCP4.5	10	2083	2054	2100	93	29.838	0.121791	100	2083	1	0	0
1583	r2i1p1_GISS–E2–R_RCP4.5_064.final.csv	[1861.0, 1883, 1893, 1926, 1971, 1995, 2010, 2020, 2034, 2054, 2083, 2100.0]	52	151	6	r2i1p1	GISS–E2–R	RCP4.5	3	1883	1861	1893	100	11.0625	–0.136958858373	100	1883	1	0	0
1584	r2i1p1_GISS–E2–R_RCP4.5_064.final.csv	[1861.0, 1883, 1893, 1926, 1971, 1995, 2010, 2020, 2034, 2054, 2083, 2100.0]	52	151	6	r2i1p1	GISS–E2–R	RCP4.5	3	1893	1883	1926	100	24.5897	0.347698	100	1887	0.8	1893	0.11
1585	r2i1p1_GISS–E2–R_RCP4.5_064.final.csv	[1861.0, 1883, 1893, 1926, 1971, 1995, 2010, 2020, 2034, 2054, 2083, 2100.0]	52	151	6	r2i1p1	GISS–E2–R	RCP4.5	3	1926	1893	1971	100	36.0241	0.152228	100	1926	0.99	1933	0.01
1586	r2i1p1_GISS–E2–R_RCP4.5_064.final.csv	[1861.0, 1883, 1893, 1926, 1971, 1995, 2010, 2020, 2034, 2054, 2083, 2100.0]	52	151	6	r2i1p1	GISS–E2–R	RCP4.5	3	1971	1926	1995	100	36.5198	0.218161	100	1971	0.96	1973	0.04
1587	r2i1p1_GISS–E2–R_RCP4.5_064.final.csv	[1861.0, 1883, 1893, 1926, 1971, 1995, 2010, 2020, 2034, 2054, 2083, 2100.0]	52	151	6	r2i1p1	GISS–E2–R	RCP4.5	3	1995	1971	2010	4	30.4835	0.408122	100	1995	0.71	1994	0.28
1588	r2i1p1_GISS–E2–R_RCP4.5_064.final.csv	[1861.0, 1883, 1893, 1926, 1971, 1995, 2010, 2020, 2034, 2054, 2083, 2100.0]	52	151	6	r2i1p1	GISS–E2–R	RCP4.5	3	2010	1995	2020	3	13.7042	0.156012	4	2009	0.39	2010	0.39
1589	r2i1p1_GISS–E2–R_RCP4.5_064.final.csv	[1861.0, 1883, 1893, 1926, 1971, 1995, 2010, 2020, 2034, 2054, 2083, 2100.0]	52	151	6	r2i1p1	GISS–E2–R	RCP4.5	3	2020	2010	2034	3	16.26	0.232331	12	2020	0.45	2021	0.31
1590	r2i1p1_GISS–E2–R_RCP4.5_064.final.csv	[1861.0, 1883, 1893, 1926, 1971, 1995, 2010, 2020, 2034, 2054, 2083, 2100.0]	52	151	6	r2i1p1	GISS–E2–R	RCP4.5	3	2034	2020	2054	12	25.6125	0.303865	23	2034	0.8	2035	0.11
1591	r2i1p1_GISS–E2–R_RCP4.5_064.final.csv	[1861.0, 1883, 1893, 1926, 1971, 1995, 2010, 2020, 2034, 2054, 2083, 2100.0]	52	151	6	r2i1p1	GISS–E2–R	RCP4.5	3	2054	2034	2083	13	32.7976	0.168701	93	2054	1	0	0
1592	r2i1p1_GISS–E2–R_RCP4.5_064.final.csv	[1861.0, 1883, 1893, 1926, 1971, 1995, 2010, 2020, 2034, 2054, 2083, 2100.0]	52	151	6	r2i1p1	GISS–E2–R	RCP4.5	3	2083	2054	2100	93	29.838	0.121791	100	2083	1	0	0
Seq	Source	BreakSet	DatasetNo	SetNo	SetNoInData	Type	Model	Treat	%BreakSet	Year	Predecessor	Successor	%SegmentFound	Ti	Shift	%YearOverall	ModalYear	ModalValue	SecondModalYear	SecondModalValue
1593	r2i1p1_HadGEM2–ES_RCP4.5_084.final.csv	[1861.0, 1875, 1915, 1960, 1997, 2013, 2027, 2037, 2044, 2051, 2065, 2076, 2100.0]	53	152	1	r2i1p1	HadGEM2–ES	RCP4.5	14	1875	1861	1915	100	22.9639	–0.200831839077	100	1875	0.85	1874	0.15
1594	r2i1p1_HadGEM2–ES_RCP4.5_084.final.csv	[1861.0, 1875, 1915, 1960, 1997, 2013, 2027, 2037, 2044, 2051, 2065, 2076, 2100.0]	53	152	1	r2i1p1	HadGEM2–ES	RCP4.5	14	1915	1875	1960	32	56.082	0.316821	100	1915	1	0	0
1595	r2i1p1_HadGEM2–ES_RCP4.5_084.final.csv	[1861.0, 1875, 1915, 1960, 1997, 2013, 2027, 2037, 2044, 2051, 2065, 2076, 2100.0]	53	152	1	r2i1p1	HadGEM2–ES	RCP4.5	14	1960	1915	1997	16	20.3681	–0.153220982321	32	1960	0.76	1961	0.21
1596	r2i1p1_HadGEM2–ES_RCP4.5_084.final.csv	[1861.0, 1875, 1915, 1960, 1997, 2013, 2027, 2037, 2044, 2051, 2065, 2076, 2100.0]	53	152	1	r2i1p1	HadGEM2–ES	RCP4.5	14	1997	1960	2013	16	41.3167	0.601435	100	1997	1	0	0
1597	r2i1p1_HadGEM2–ES_RCP4.5_084.final.csv	[1861.0, 1875, 1915, 1960, 1997, 2013, 2027, 2037, 2044, 2051, 2065, 2076, 2100.0]	53	152	1	r2i1p1	HadGEM2–ES	RCP4.5	14	2013	1997	2027	84	24.7524	0.494829	100	2013	1	0	0
1598	r2i1p1_HadGEM2–ES_RCP4.5_084.final.csv	[1861.0, 1875, 1915, 1960, 1997, 2013, 2027, 2037, 2044, 2051, 2065, 2076, 2100.0]	53	152	1	r2i1p1	HadGEM2–ES	RCP4.5	14	2027	2013	2037	43	18.0314	0.374661	84	2027	0.86	2025	0.13
1599	r2i1p1_HadGEM2–ES_RCP4.5_084.final.csv	[1861.0, 1875, 1915, 1960, 1997, 2013, 2027, 2037, 2044, 2051, 2065, 2076, 2100.0]	53	152	1	r2i1p1	HadGEM2–ES	RCP4.5	14	2037	2027	2044	41	13.4519	0.40479	43	2037	0.67	2036	0.18
1600	r2i1p1_HadGEM2–ES_RCP4.5_084.final.csv	[1861.0, 1875, 1915, 1960, 1997, 2013, 2027, 2037, 2044, 2051, 2065, 2076, 2100.0]	53	152	1	r2i1p1	HadGEM2–ES	RCP4.5	14	2044	2037	2051	41	10.1087	0.270321	55	2044	0.58	2045	0.38
1601	r2i1p1_HadGEM2–ES_RCP4.5_084.final.csv	[1861.0, 1875, 1915, 1960, 1997, 2013, 2027, 2037, 2044, 2051, 2065, 2076, 2100.0]	53	152	1	r2i1p1	HadGEM2–ES	RCP4.5	14	2051	2044	2065	55	16.5471	0.233901	55	2051	0.98	2050	0.02
1602	r2i1p1_HadGEM2–ES_RCP4.5_084.final.csv	[1861.0, 1875, 1915, 1960, 1997, 2013, 2027, 2037, 2044, 2051, 2065, 2076, 2100.0]	53	152	1	r2i1p1	HadGEM2–ES	RCP4.5	14	2065	2051	2076	55	13.2812	0.119102	98	2065	0.94	2066	0.06
1603	r2i1p1_HadGEM2–ES_RCP4.5_084.final.csv	[1861.0, 1875, 1915, 1960, 1997, 2013, 2027, 2037, 2044, 2051, 2065, 2076, 2100.0]	53	152	1	r2i1p1	HadGEM2–ES	RCP4.5	14	2076	2065	2100	98	28.3517	0.335961	100	2076	1	0	0
1604	r2i1p1_HadGEM2–ES_RCP4.5_084.final.csv	[1861.0, 1875, 1915, 1961, 1977, 1997, 2013, 2027, 2037, 2044, 2051, 2065, 2076, 2100.0]	53	153	2	r2i1p1	HadGEM2–ES	RCP4.5	27	1875	1861	1915	100	22.9639	–0.200831839077	100	1875	0.85	1874	0.15
1605	r2i1p1_HadGEM2–ES_RCP4.5_084.final.csv	[1861.0, 1875, 1915, 1961, 1977, 1997, 2013, 2027, 2037, 2044, 2051, 2065, 2076, 2100.0]	53	153	2	r2i1p1	HadGEM2–ES	RCP4.5	27	1915	1875	1961	68	56.7698	0.315436	100	1915	1	0	0
1606	r2i1p1_HadGEM2–ES_RCP4.5_084.final.csv	[1861.0, 1875, 1915, 1961, 1977, 1997, 2013, 2027, 2037, 2044, 2051, 2065, 2076, 2100.0]	53	153	2	r2i1p1	HadGEM2–ES	RCP4.5	27	1961	1915	1977	68	31.2486	–0.260694946944	68	1961	0.94	1962	0.05
1607	r2i1p1_HadGEM2–ES_RCP4.5_084.final.csv	[1861.0, 1875, 1915, 1961, 1977, 1997, 2013, 2027, 2037, 2044, 2051, 2065, 2076, 2100.0]	53	153	2	r2i1p1	HadGEM2–ES	RCP4.5	27	1977	1961	1997	68	13.3849	0.193323	84	1977	0.72	1976	0.22
1608	r2i1p1_HadGEM2–ES_RCP4.5_084.final.csv	[1861.0, 1875, 1915, 1961, 1977, 1997, 2013, 2027, 2037, 2044, 2051, 2065, 2076, 2100.0]	53	153	2	r2i1p1	HadGEM2–ES	RCP4.5	27	1997	1977	2013	84	28.9934	0.518908	100	1997	1	0	0
1609	r2i1p1_HadGEM2–ES_RCP4.5_084.final.csv	[1861.0, 1875, 1915, 1961, 1977, 1997, 2013, 2027, 2037, 2044, 2051, 2065, 2076, 2100.0]	53	153	2	r2i1p1	HadGEM2–ES	RCP4.5	27	2013	1997	2027	84	24.7524	0.494829	100	2013	1	0	0
1610	r2i1p1_HadGEM2–ES_RCP4.5_084.final.csv	[1861.0, 1875, 1915, 1961, 1977, 1997, 2013, 2027, 2037, 2044, 2051, 2065, 2076, 2100.0]	53	153	2	r2i1p1	HadGEM2–ES	RCP4.5	27	2027	2013	2037	43	18.0314	0.374661	84	2027	0.86	2025	0.13
1611	r2i1p1_HadGEM2–ES_RCP4.5_084.final.csv	[1861.0, 1875, 1915, 1961, 1977, 1997, 2013, 2027, 2037, 2044, 2051, 2065, 2076, 2100.0]	53	153	2	r2i1p1	HadGEM2–ES	RCP4.5	27	2037	2027	2044	41	13.4519	0.40479	43	2037	0.67	2036	0.18
1612	r2i1p1_HadGEM2–ES_RCP4.5_084.final.csv	[1861.0, 1875, 1915, 1961, 1977, 1997, 2013, 2027, 2037, 2044, 2051, 2065, 2076, 2100.0]	53	153	2	r2i1p1	HadGEM2–ES	RCP4.5	27	2044	2037	2051	41	10.1087	0.270321	55	2044	0.58	2045	0.38
1613	r2i1p1_HadGEM2–ES_RCP4.5_084.final.csv	[1861.0, 1875, 1915, 1961, 1977, 1997, 2013, 2027, 2037, 2044, 2051, 2065, 2076, 2100.0]	53	153	2	r2i1p1	HadGEM2–ES	RCP4.5	27	2051	2044	2065	55	16.5471	0.233901	55	2051	0.98	2050	0.02
1614	r2i1p1_HadGEM2–ES_RCP4.5_084.final.csv	[1861.0, 1875, 1915, 1961, 1977, 1997, 2013, 2027, 2037, 2044, 2051, 2065, 2076, 2100.0]	53	153	2	r2i1p1	HadGEM2–ES	RCP4.5	27	2065	2051	2076	55	13.2812	0.119102	98	2065	0.94	2066	0.06
1615	r2i1p1_HadGEM2–ES_RCP4.5_084.final.csv	[1861.0, 1875, 1915, 1961, 1977, 1997, 2013, 2027, 2037, 2044, 2051, 2065, 2076, 2100.0]	53	153	2	r2i1p1	HadGEM2–ES	RCP4.5	27	2076	2065	2100	98	28.3517	0.335961	100	2076	1	0	0
1616	r2i1p1_HadGEM2–ES_RCP4.5_084.final.csv	[1861.0, 1875, 1915, 1960, 1977, 1997, 2013, 2025, 2038, 2049, 2065, 2076, 2100.0]	53	154	3	r2i1p1	HadGEM2–ES	RCP4.5	2	1875	1861	1915	100	22.9639	–0.200831839077	100	1875	0.85	1874	0.15
1617	r2i1p1_HadGEM2–ES_RCP4.5_084.final.csv	[1861.0, 1875, 1915, 1960, 1977, 1997, 2013, 2025, 2038, 2049, 2065, 2076, 2100.0]	53	154	3	r2i1p1	HadGEM2–ES	RCP4.5	2	1915	1875	1960	32	56.082	0.316821	100	1915	1	0	0
1618	r2i1p1_HadGEM2–ES_RCP4.5_084.final.csv	[1861.0, 1875, 1915, 1960, 1977, 1997, 2013, 2025, 2038, 2049, 2065, 2076, 2100.0]	53	154	3	r2i1p1	HadGEM2–ES	RCP4.5	2	1960	1915	1977	16	31.2486	–0.260694946944	32	1961	0.94	1962	0.05
1619	r2i1p1_HadGEM2–ES_RCP4.5_084.final.csv	[1861.0, 1875, 1915, 1960, 1977, 1997, 2013, 2025, 2038, 2049, 2065, 2076, 2100.0]	53	154	3	r2i1p1	HadGEM2–ES	RCP4.5	2	1977	1960	1997	16	12.5999	0.182504	84	1977	0.78	1976	0.19
1620	r2i1p1_HadGEM2–ES_RCP4.5_084.final.csv	[1861.0, 1875, 1915, 1960, 1977, 1997, 2013, 2025, 2038, 2049, 2065, 2076, 2100.0]	53	154	3	r2i1p1	HadGEM2–ES	RCP4.5	2	1997	1977	2013	84	28.9934	0.518908	100	1997	1	0	0
1621	r2i1p1_HadGEM2–ES_RCP4.5_084.final.csv	[1861.0, 1875, 1915, 1960, 1977, 1997, 2013, 2025, 2038, 2049, 2065, 2076, 2100.0]	53	154	3	r2i1p1	HadGEM2–ES	RCP4.5	2	2013	1997	2025	16	23.1417	0.470008	100	2013	0.96	2011	0.04
1622	r2i1p1_HadGEM2–ES_RCP4.5_084.final.csv	[1861.0, 1875, 1915, 1960, 1977, 1997, 2013, 2025, 2038, 2049, 2065, 2076, 2100.0]	53	154	3	r2i1p1	HadGEM2–ES	RCP4.5	2	2025	2013	2038	2	18.5885	0.394647	16	2027	0.96	2025	0.04
1623	r2i1p1_HadGEM2–ES_RCP4.5_084.final.csv	[1861.0, 1875, 1915, 1960, 1977, 1997, 2013, 2025, 2038, 2049, 2065, 2076, 2100.0]	53	154	3	r2i1p1	HadGEM2–ES	RCP4.5	2	2038	2025	2049	2	18.8889	0.545537	43	2038	0.6	2037	0.35
1624	r2i1p1_HadGEM2–ES_RCP4.5_084.final.csv	[1861.0, 1875, 1915, 1960, 1977, 1997, 2013, 2025, 2038, 2049, 2065, 2076, 2100.0]	53	154	3	r2i1p1	HadGEM2–ES	RCP4.5	2	2049	2038	2065	43	20.2512	0.357722	43	2049	0.63	2050	0.21
1625	r2i1p1_HadGEM2–ES_RCP4.5_084.final.csv	[1861.0, 1875, 1915, 1960, 1977, 1997, 2013, 2025, 2038, 2049, 2065, 2076, 2100.0]	53	154	3	r2i1p1	HadGEM2–ES	RCP4.5	2	2065	2049	2076	43	13.184	0.140102	98	2065	0.92	2066	0.08
1626	r2i1p1_HadGEM2–ES_RCP4.5_084.final.csv	[1861.0, 1875, 1915, 1960, 1977, 1997, 2013, 2025, 2038, 2049, 2065, 2076, 2100.0]	53	154	3	r2i1p1	HadGEM2–ES	RCP4.5	2	2076	2065	2100	98	28.3517	0.335961	100	2076	1	0	0
1627	r2i1p1_HadGEM2–ES_RCP4.5_084.final.csv	[1861.0, 1875, 1915, 1961, 1977, 1997, 2013, 2027, 2038, 2049, 2065, 2076, 2100.0]	53	155	4	r2i1p1	HadGEM2–ES	RCP4.5	40	1875	1861	1915	100	22.9639	–0.200831839077	100	1875	0.85	1874	0.15
1628	r2i1p1_HadGEM2–ES_RCP4.5_084.final.csv	[1861.0, 1875, 1915, 1961, 1977, 1997, 2013, 2027, 2038, 2049, 2065, 2076, 2100.0]	53	155	4	r2i1p1	HadGEM2–ES	RCP4.5	40	1915	1875	1961	68	56.7698	0.315436	100	1915	1	0	0
1629	r2i1p1_HadGEM2–ES_RCP4.5_084.final.csv	[1861.0, 1875, 1915, 1961, 1977, 1997, 2013, 2027, 2038, 2049, 2065, 2076, 2100.0]	53	155	4	r2i1p1	HadGEM2–ES	RCP4.5	40	1961	1915	1977	68	31.2486	–0.260694946944	68	1961	0.94	1962	0.05
1630	r2i1p1_HadGEM2–ES_RCP4.5_084.final.csv	[1861.0, 1875, 1915, 1961, 1977, 1997, 2013, 2027, 2038, 2049, 2065, 2076, 2100.0]	53	155	4	r2i1p1	HadGEM2–ES	RCP4.5	40	1977	1961	1997	68	13.3849	0.193323	84	1977	0.72	1976	0.22
1631	r2i1p1_HadGEM2–ES_RCP4.5_084.final.csv	[1861.0, 1875, 1915, 1961, 1977, 1997, 2013, 2027, 2038, 2049, 2065, 2076, 2100.0]	53	155	4	r2i1p1	HadGEM2–ES	RCP4.5	40	1997	1977	2013	84	28.9934	0.518908	100	1997	1	0	0
1632	r2i1p1_HadGEM2–ES_RCP4.5_084.final.csv	[1861.0, 1875, 1915, 1961, 1977, 1997, 2013, 2027, 2038, 2049, 2065, 2076, 2100.0]	53	155	4	r2i1p1	HadGEM2–ES	RCP4.5	40	2013	1997	2027	84	24.7524	0.494829	100	2013	1	0	0
1633	r2i1p1_HadGEM2–ES_RCP4.5_084.final.csv	[1861.0, 1875, 1915, 1961, 1977, 1997, 2013, 2027, 2038, 2049, 2065, 2076, 2100.0]	53	155	4	r2i1p1	HadGEM2–ES	RCP4.5	40	2027	2013	2038	41	18.5885	0.394647	84	2027	0.96	2025	0.04
1634	r2i1p1_HadGEM2–ES_RCP4.5_084.final.csv	[1861.0, 1875, 1915, 1961, 1977, 1997, 2013, 2027, 2038, 2049, 2065, 2076, 2100.0]	53	155	4	r2i1p1	HadGEM2–ES	RCP4.5	40	2038	2027	2049	41	17.3631	0.507622	43	2038	0.76	2037	0.23
1635	r2i1p1_HadGEM2–ES_RCP4.5_084.final.csv	[1861.0, 1875, 1915, 1961, 1977, 1997, 2013, 2027, 2038, 2049, 2065, 2076, 2100.0]	53	155	4	r2i1p1	HadGEM2–ES	RCP4.5	40	2049	2038	2065	43	20.2512	0.357722	43	2049	0.63	2050	0.21
1636	r2i1p1_HadGEM2–ES_RCP4.5_084.final.csv	[1861.0, 1875, 1915, 1961, 1977, 1997, 2013, 2027, 2038, 2049, 2065, 2076, 2100.0]	53	155	4	r2i1p1	HadGEM2–ES	RCP4.5	40	2065	2049	2076	43	13.184	0.140102	98	2065	0.92	2066	0.08
1637	r2i1p1_HadGEM2–ES_RCP4.5_084.final.csv	[1861.0, 1875, 1915, 1961, 1977, 1997, 2013, 2027, 2038, 2049, 2065, 2076, 2100.0]	53	155	4	r2i1p1	HadGEM2–ES	RCP4.5	40	2076	2065	2100	98	28.3517	0.335961	100	2076	1	0	0
1638	r2i1p1_HadGEM2–ES_RCP4.5_084.final.csv	[1861.0, 1875, 1915, 1960, 1997, 2013, 2027, 2038, 2049, 2065, 2076, 2100.0]	53	156	5	r2i1p1	HadGEM2–ES	RCP4.5	1	1875	1861	1915	100	22.9639	–0.200831839077	100	1875	0.85	1874	0.15
1639	r2i1p1_HadGEM2–ES_RCP4.5_084.final.csv	[1861.0, 1875, 1915, 1960, 1997, 2013, 2027, 2038, 2049, 2065, 2076, 2100.0]	53	156	5	r2i1p1	HadGEM2–ES	RCP4.5	1	1915	1875	1960	32	56.082	0.316821	100	1915	1	0	0
1640	r2i1p1_HadGEM2–ES_RCP4.5_084.final.csv	[1861.0, 1875, 1915, 1960, 1997, 2013, 2027, 2038, 2049, 2065, 2076, 2100.0]	53	156	5	r2i1p1	HadGEM2–ES	RCP4.5	1	1960	1915	1997	16	20.3681	–0.153220982321	32	1960	0.76	1961	0.21
1641	r2i1p1_HadGEM2–ES_RCP4.5_084.final.csv	[1861.0, 1875, 1915, 1960, 1997, 2013, 2027, 2038, 2049, 2065, 2076, 2100.0]	53	156	5	r2i1p1	HadGEM2–ES	RCP4.5	1	1997	1960	2013	16	41.3167	0.601435	100	1997	1	0	0
1642	r2i1p1_HadGEM2–ES_RCP4.5_084.final.csv	[1861.0, 1875, 1915, 1960, 1997, 2013, 2027, 2038, 2049, 2065, 2076, 2100.0]	53	156	5	r2i1p1	HadGEM2–ES	RCP4.5	1	2013	1997	2027	84	24.7524	0.494829	100	2013	1	0	0
1643	r2i1p1_HadGEM2–ES_RCP4.5_084.final.csv	[1861.0, 1875, 1915, 1960, 1997, 2013, 2027, 2038, 2049, 2065, 2076, 2100.0]	53	156	5	r2i1p1	HadGEM2–ES	RCP4.5	1	2027	2013	2038	41	18.5885	0.394647	84	2027	0.96	2025	0.04
1644	r2i1p1_HadGEM2–ES_RCP4.5_084.final.csv	[1861.0, 1875, 1915, 1960, 1997, 2013, 2027, 2038, 2049, 2065, 2076, 2100.0]	53	156	5	r2i1p1	HadGEM2–ES	RCP4.5	1	2038	2027	2049	41	17.3631	0.507622	43	2038	0.76	2037	0.23
1645	r2i1p1_HadGEM2–ES_RCP4.5_084.final.csv	[1861.0, 1875, 1915, 1960, 1997, 2013, 2027, 2038, 2049, 2065, 2076, 2100.0]	53	156	5	r2i1p1	HadGEM2–ES	RCP4.5	1	2049	2038	2065	43	20.2512	0.357722	43	2049	0.63	2050	0.21
1646	r2i1p1_HadGEM2–ES_RCP4.5_084.final.csv	[1861.0, 1875, 1915, 1960, 1997, 2013, 2027, 2038, 2049, 2065, 2076, 2100.0]	53	156	5	r2i1p1	HadGEM2–ES	RCP4.5	1	2065	2049	2076	43	13.184	0.140102	98	2065	0.92	2066	0.08
1647	r2i1p1_HadGEM2–ES_RCP4.5_084.final.csv	[1861.0, 1875, 1915, 1960, 1997, 2013, 2027, 2038, 2049, 2065, 2076, 2100.0]	53	156	5	r2i1p1	HadGEM2–ES	RCP4.5	1	2076	2065	2100	98	28.3517	0.335961	100	2076	1	0	0
1648	r2i1p1_HadGEM2–ES_RCP4.5_084.final.csv	[1861.0, 1875, 1915, 1961, 1977, 1997, 2013, 2027, 2037, 2045, 2076, 2100.0]	53	157	6	r2i1p1	HadGEM2–ES	RCP4.5	1	1875	1861	1915	100	22.9639	–0.200831839077	100	1875	0.85	1874	0.15
1649	r2i1p1_HadGEM2–ES_RCP4.5_084.final.csv	[1861.0, 1875, 1915, 1961, 1977, 1997, 2013, 2027, 2037, 2045, 2076, 2100.0]	53	157	6	r2i1p1	HadGEM2–ES	RCP4.5	1	1915	1875	1961	68	56.7698	0.315436	100	1915	1	0	0
1650	r2i1p1_HadGEM2–ES_RCP4.5_084.final.csv	[1861.0, 1875, 1915, 1961, 1977, 1997, 2013, 2027, 2037, 2045, 2076, 2100.0]	53	157	6	r2i1p1	HadGEM2–ES	RCP4.5	1	1961	1915	1977	68	31.2486	–0.260694946944	68	1961	0.94	1962	0.05
1651	r2i1p1_HadGEM2–ES_RCP4.5_084.final.csv	[1861.0, 1875, 1915, 1961, 1977, 1997, 2013, 2027, 2037, 2045, 2076, 2100.0]	53	157	6	r2i1p1	HadGEM2–ES	RCP4.5	1	1977	1961	1997	68	13.3849	0.193323	84	1977	0.72	1976	0.22
1652	r2i1p1_HadGEM2–ES_RCP4.5_084.final.csv	[1861.0, 1875, 1915, 1961, 1977, 1997, 2013, 2027, 2037, 2045, 2076, 2100.0]	53	157	6	r2i1p1	HadGEM2–ES	RCP4.5	1	1997	1977	2013	84	28.9934	0.518908	100	1997	1	0	0
1653	r2i1p1_HadGEM2–ES_RCP4.5_084.final.csv	[1861.0, 1875, 1915, 1961, 1977, 1997, 2013, 2027, 2037, 2045, 2076, 2100.0]	53	157	6	r2i1p1	HadGEM2–ES	RCP4.5	1	2013	1997	2027	84	24.7524	0.494829	100	2013	1	0	0
1654	r2i1p1_HadGEM2–ES_RCP4.5_084.final.csv	[1861.0, 1875, 1915, 1961, 1977, 1997, 2013, 2027, 2037, 2045, 2076, 2100.0]	53	157	6	r2i1p1	HadGEM2–ES	RCP4.5	1	2027	2013	2037	43	18.0314	0.374661	84	2027	0.86	2025	0.13
1655	r2i1p1_HadGEM2–ES_RCP4.5_084.final.csv	[1861.0, 1875, 1915, 1961, 1977, 1997, 2013, 2027, 2037, 2045, 2076, 2100.0]	53	157	6	r2i1p1	HadGEM2–ES	RCP4.5	1	2037	2027	2045	2	14.2752	0.423658	43	2037	0.78	2036	0.14
1656	r2i1p1_HadGEM2–ES_RCP4.5_084.final.csv	[1861.0, 1875, 1915, 1961, 1977, 1997, 2013, 2027, 2037, 2045, 2076, 2100.0]	53	157	6	r2i1p1	HadGEM2–ES	RCP4.5	1	2045	2037	2076	2	29.2536	0.429715	2	2050	0.52	2051	0.3
1657	r2i1p1_HadGEM2–ES_RCP4.5_084.final.csv	[1861.0, 1875, 1915, 1961, 1977, 1997, 2013, 2027, 2037, 2045, 2076, 2100.0]	53	157	6	r2i1p1	HadGEM2–ES	RCP4.5	1	2076	2045	2100	2	43.9261	0.45262	100	2076	0.96	2075	0.04
1658	r2i1p1_HadGEM2–ES_RCP4.5_084.final.csv	[1861.0, 1875, 1915, 1960, 1977, 1997, 2013, 2025, 2036, 2044, 2051, 2065, 2076, 2100.0]	53	158	7	r2i1p1	HadGEM2–ES	RCP4.5	8	1875	1861	1915	100	22.9639	–0.200831839077	100	1875	0.85	1874	0.15
1659	r2i1p1_HadGEM2–ES_RCP4.5_084.final.csv	[1861.0, 1875, 1915, 1960, 1977, 1997, 2013, 2025, 2036, 2044, 2051, 2065, 2076, 2100.0]	53	158	7	r2i1p1	HadGEM2–ES	RCP4.5	8	1915	1875	1960	32	56.082	0.316821	100	1915	1	0	0
1660	r2i1p1_HadGEM2–ES_RCP4.5_084.final.csv	[1861.0, 1875, 1915, 1960, 1977, 1997, 2013, 2025, 2036, 2044, 2051, 2065, 2076, 2100.0]	53	158	7	r2i1p1	HadGEM2–ES	RCP4.5	8	1960	1915	1977	16	31.2486	–0.260694946944	32	1961	0.94	1962	0.05
1661	r2i1p1_HadGEM2–ES_RCP4.5_084.final.csv	[1861.0, 1875, 1915, 1960, 1977, 1997, 2013, 2025, 2036, 2044, 2051, 2065, 2076, 2100.0]	53	158	7	r2i1p1	HadGEM2–ES	RCP4.5	8	1977	1960	1997	16	12.5999	0.182504	84	1977	0.78	1976	0.19
1662	r2i1p1_HadGEM2–ES_RCP4.5_084.final.csv	[1861.0, 1875, 1915, 1960, 1977, 1997, 2013, 2025, 2036, 2044, 2051, 2065, 2076, 2100.0]	53	158	7	r2i1p1	HadGEM2–ES	RCP4.5	8	1997	1977	2013	84	28.9934	0.518908	100	1997	1	0	0
1663	r2i1p1_HadGEM2–ES_RCP4.5_084.final.csv	[1861.0, 1875, 1915, 1960, 1977, 1997, 2013, 2025, 2036, 2044, 2051, 2065, 2076, 2100.0]	53	158	7	r2i1p1	HadGEM2–ES	RCP4.5	8	2013	1997	2025	16	23.1417	0.470008	100	2013	0.96	2011	0.04
1664	r2i1p1_HadGEM2–ES_RCP4.5_084.final.csv	[1861.0, 1875, 1915, 1960, 1977, 1997, 2013, 2025, 2036, 2044, 2051, 2065, 2076, 2100.0]	53	158	7	r2i1p1	HadGEM2–ES	RCP4.5	8	2025	2013	2036	8	17.3626	0.356593	16	2027	0.59	2025	0.41
1665	r2i1p1_HadGEM2–ES_RCP4.5_084.final.csv	[1861.0, 1875, 1915, 1960, 1977, 1997, 2013, 2025, 2036, 2044, 2051, 2065, 2076, 2100.0]	53	158	7	r2i1p1	HadGEM2–ES	RCP4.5	8	2036	2025	2044	8	14.6968	0.433442	8	2036	0.42	2035	0.39
1666	r2i1p1_HadGEM2–ES_RCP4.5_084.final.csv	[1861.0, 1875, 1915, 1960, 1977, 1997, 2013, 2025, 2036, 2044, 2051, 2065, 2076, 2100.0]	53	158	7	r2i1p1	HadGEM2–ES	RCP4.5	8	2044	2036	2051	8	10.4293	0.297094	55	2044	0.71	2043	0.12
1667	r2i1p1_HadGEM2–ES_RCP4.5_084.final.csv	[1861.0, 1875, 1915, 1960, 1977, 1997, 2013, 2025, 2036, 2044, 2051, 2065, 2076, 2100.0]	53	158	7	r2i1p1	HadGEM2–ES	RCP4.5	8	2051	2044	2065	55	16.5471	0.233901	55	2051	0.98	2050	0.02
1668	r2i1p1_HadGEM2–ES_RCP4.5_084.final.csv	[1861.0, 1875, 1915, 1960, 1977, 1997, 2013, 2025, 2036, 2044, 2051, 2065, 2076, 2100.0]	53	158	7	r2i1p1	HadGEM2–ES	RCP4.5	8	2065	2051	2076	55	13.2812	0.119102	98	2065	0.94	2066	0.06
1669	r2i1p1_HadGEM2–ES_RCP4.5_084.final.csv	[1861.0, 1875, 1915, 1960, 1977, 1997, 2013, 2025, 2036, 2044, 2051, 2065, 2076, 2100.0]	53	158	7	r2i1p1	HadGEM2–ES	RCP4.5	8	2076	2065	2100	98	28.3517	0.335961	100	2076	1	0	0
1670	r2i1p1_HadGEM2–ES_RCP4.5_084.final.csv	[1861.0, 1875, 1915, 1960, 1997, 2013, 2027, 2037, 2045, 2076, 2100.0]	53	159	8	r2i1p1	HadGEM2–ES	RCP4.5	1	1875	1861	1915	100	22.9639	–0.200831839077	100	1875	0.85	1874	0.15
1671	r2i1p1_HadGEM2–ES_RCP4.5_084.final.csv	[1861.0, 1875, 1915, 1960, 1997, 2013, 2027, 2037, 2045, 2076, 2100.0]	53	159	8	r2i1p1	HadGEM2–ES	RCP4.5	1	1915	1875	1960	32	56.082	0.316821	100	1915	1	0	0
1672	r2i1p1_HadGEM2–ES_RCP4.5_084.final.csv	[1861.0, 1875, 1915, 1960, 1997, 2013, 2027, 2037, 2045, 2076, 2100.0]	53	159	8	r2i1p1	HadGEM2–ES	RCP4.5	1	1960	1915	1997	16	20.3681	–0.153220982321	32	1960	0.76	1961	0.21
1673	r2i1p1_HadGEM2–ES_RCP4.5_084.final.csv	[1861.0, 1875, 1915, 1960, 1997, 2013, 2027, 2037, 2045, 2076, 2100.0]	53	159	8	r2i1p1	HadGEM2–ES	RCP4.5	1	1997	1960	2013	16	41.3167	0.601435	100	1997	1	0	0
1674	r2i1p1_HadGEM2–ES_RCP4.5_084.final.csv	[1861.0, 1875, 1915, 1960, 1997, 2013, 2027, 2037, 2045, 2076, 2100.0]	53	159	8	r2i1p1	HadGEM2–ES	RCP4.5	1	2013	1997	2027	84	24.7524	0.494829	100	2013	1	0	0
1675	r2i1p1_HadGEM2–ES_RCP4.5_084.final.csv	[1861.0, 1875, 1915, 1960, 1997, 2013, 2027, 2037, 2045, 2076, 2100.0]	53	159	8	r2i1p1	HadGEM2–ES	RCP4.5	1	2027	2013	2037	43	18.0314	0.374661	84	2027	0.86	2025	0.13
1676	r2i1p1_HadGEM2–ES_RCP4.5_084.final.csv	[1861.0, 1875, 1915, 1960, 1997, 2013, 2027, 2037, 2045, 2076, 2100.0]	53	159	8	r2i1p1	HadGEM2–ES	RCP4.5	1	2037	2027	2045	2	14.2752	0.423658	43	2037	0.78	2036	0.14
1677	r2i1p1_HadGEM2–ES_RCP4.5_084.final.csv	[1861.0, 1875, 1915, 1960, 1997, 2013, 2027, 2037, 2045, 2076, 2100.0]	53	159	8	r2i1p1	HadGEM2–ES	RCP4.5	1	2045	2037	2076	2	29.2536	0.429715	2	2050	0.52	2051	0.3
1678	r2i1p1_HadGEM2–ES_RCP4.5_084.final.csv	[1861.0, 1875, 1915, 1960, 1997, 2013, 2027, 2037, 2045, 2076, 2100.0]	53	159	8	r2i1p1	HadGEM2–ES	RCP4.5	1	2076	2045	2100	2	43.9261	0.45262	100	2076	0.96	2075	0.04
1679	r2i1p1_HadGEM2–ES_RCP4.5_084.final.csv	[1861.0, 1875, 1915, 1960, 1977, 1997, 2013, 2025, 2035, 2044, 2051, 2065, 2076, 2100.0]	53	160	9	r2i1p1	HadGEM2–ES	RCP4.5	6	1875	1861	1915	100	22.9639	–0.200831839077	100	1875	0.85	1874	0.15
1680	r2i1p1_HadGEM2–ES_RCP4.5_084.final.csv	[1861.0, 1875, 1915, 1960, 1977, 1997, 2013, 2025, 2035, 2044, 2051, 2065, 2076, 2100.0]	53	160	9	r2i1p1	HadGEM2–ES	RCP4.5	6	1915	1875	1960	32	56.082	0.316821	100	1915	1	0	0
1681	r2i1p1_HadGEM2–ES_RCP4.5_084.final.csv	[1861.0, 1875, 1915, 1960, 1977, 1997, 2013, 2025, 2035, 2044, 2051, 2065, 2076, 2100.0]	53	160	9	r2i1p1	HadGEM2–ES	RCP4.5	6	1960	1915	1977	16	31.2486	–0.260694946944	32	1961	0.94	1962	0.05
1682	r2i1p1_HadGEM2–ES_RCP4.5_084.final.csv	[1861.0, 1875, 1915, 1960, 1977, 1997, 2013, 2025, 2035, 2044, 2051, 2065, 2076, 2100.0]	53	160	9	r2i1p1	HadGEM2–ES	RCP4.5	6	1977	1960	1997	16	12.5999	0.182504	84	1977	0.78	1976	0.19
1683	r2i1p1_HadGEM2–ES_RCP4.5_084.final.csv	[1861.0, 1875, 1915, 1960, 1977, 1997, 2013, 2025, 2035, 2044, 2051, 2065, 2076, 2100.0]	53	160	9	r2i1p1	HadGEM2–ES	RCP4.5	6	1997	1977	2013	84	28.9934	0.518908	100	1997	1	0	0
1684	r2i1p1_HadGEM2–ES_RCP4.5_084.final.csv	[1861.0, 1875, 1915, 1960, 1977, 1997, 2013, 2025, 2035, 2044, 2051, 2065, 2076, 2100.0]	53	160	9	r2i1p1	HadGEM2–ES	RCP4.5	6	2013	1997	2025	16	23.1417	0.470008	100	2013	0.96	2011	0.04
1685	r2i1p1_HadGEM2–ES_RCP4.5_084.final.csv	[1861.0, 1875, 1915, 1960, 1977, 1997, 2013, 2025, 2035, 2044, 2051, 2065, 2076, 2100.0]	53	160	9	r2i1p1	HadGEM2–ES	RCP4.5	6	2025	2013	2035	6	16.7076	0.325324	16	2025	0.8	2027	0.19
1686	r2i1p1_HadGEM2–ES_RCP4.5_084.final.csv	[1861.0, 1875, 1915, 1960, 1977, 1997, 2013, 2025, 2035, 2044, 2051, 2065, 2076, 2100.0]	53	160	9	r2i1p1	HadGEM2–ES	RCP4.5	6	2035	2025	2044	6	14.6968	0.433442	6	2036	0.42	2035	0.39
1687	r2i1p1_HadGEM2–ES_RCP4.5_084.final.csv	[1861.0, 1875, 1915, 1960, 1977, 1997, 2013, 2025, 2035, 2044, 2051, 2065, 2076, 2100.0]	53	160	9	r2i1p1	HadGEM2–ES	RCP4.5	6	2044	2035	2051	6	10.8325	0.323239	55	2044	0.5	2043	0.21
1688	r2i1p1_HadGEM2–ES_RCP4.5_084.final.csv	[1861.0, 1875, 1915, 1960, 1977, 1997, 2013, 2025, 2035, 2044, 2051, 2065, 2076, 2100.0]	53	160	9	r2i1p1	HadGEM2–ES	RCP4.5	6	2051	2044	2065	55	16.5471	0.233901	55	2051	0.98	2050	0.02
1689	r2i1p1_HadGEM2–ES_RCP4.5_084.final.csv	[1861.0, 1875, 1915, 1960, 1977, 1997, 2013, 2025, 2035, 2044, 2051, 2065, 2076, 2100.0]	53	160	9	r2i1p1	HadGEM2–ES	RCP4.5	6	2065	2051	2076	55	13.2812	0.119102	98	2065	0.94	2066	0.06
1690	r2i1p1_HadGEM2–ES_RCP4.5_084.final.csv	[1861.0, 1875, 1915, 1960, 1977, 1997, 2013, 2025, 2035, 2044, 2051, 2065, 2076, 2100.0]	53	160	9	r2i1p1	HadGEM2–ES	RCP4.5	6	2076	2065	2100	98	28.3517	0.335961	100	2076	1	0	0
Seq	Source	BreakSet	DatasetNo	SetNo	SetNoInData	Type	Model	Treat	%BreakSet	Year	Predecessor	Successor	%SegmentFound	Ti	Shift	%YearOverall	ModalYear	ModalValue	SecondModalYear	SecondModalValue
1691	r2i1p1_IPSL–CM5A–LR_RCP4.5_089.final.csv	[1861.0, 1907, 1935, 1978, 1994, 2004, 2023, 2033, 2047, 2061, 2084, 2100.0]	54	161	1	r2i1p1	IPSL–CM5A–LR	RCP4.5	99	1907	1861	1935	100	23.4146	0.161379	100	1907	1	0	0
1692	r2i1p1_IPSL–CM5A–LR_RCP4.5_089.final.csv	[1861.0, 1907, 1935, 1978, 1994, 2004, 2023, 2033, 2047, 2061, 2084, 2100.0]	54	161	1	r2i1p1	IPSL–CM5A–LR	RCP4.5	99	1935	1907	1978	100	36.1214	0.219073	100	1935	0.85	1929	0.15
1693	r2i1p1_IPSL–CM5A–LR_RCP4.5_089.final.csv	[1861.0, 1907, 1935, 1978, 1994, 2004, 2023, 2033, 2047, 2061, 2084, 2100.0]	54	161	1	r2i1p1	IPSL–CM5A–LR	RCP4.5	99	1978	1935	1994	99	40.753	0.385444	100	1978	0.99	1979	0.01
1694	r2i1p1_IPSL–CM5A–LR_RCP4.5_089.final.csv	[1861.0, 1907, 1935, 1978, 1994, 2004, 2023, 2033, 2047, 2061, 2084, 2100.0]	54	161	1	r2i1p1	IPSL–CM5A–LR	RCP4.5	99	1994	1978	2004	99	19.9503	0.494338	99	1994	0.96	1995	0.03
1695	r2i1p1_IPSL–CM5A–LR_RCP4.5_089.final.csv	[1861.0, 1907, 1935, 1978, 1994, 2004, 2023, 2033, 2047, 2061, 2084, 2100.0]	54	161	1	r2i1p1	IPSL–CM5A–LR	RCP4.5	99	2004	1994	2023	99	16.4109	0.275868	99	2004	0.54	2000	0.36
1696	r2i1p1_IPSL–CM5A–LR_RCP4.5_089.final.csv	[1861.0, 1907, 1935, 1978, 1994, 2004, 2023, 2033, 2047, 2061, 2084, 2100.0]	54	161	1	r2i1p1	IPSL–CM5A–LR	RCP4.5	99	2023	2004	2033	99	21.9105	0.414156	99	2023	1	0	0
1697	r2i1p1_IPSL–CM5A–LR_RCP4.5_089.final.csv	[1861.0, 1907, 1935, 1978, 1994, 2004, 2023, 2033, 2047, 2061, 2084, 2100.0]	54	161	1	r2i1p1	IPSL–CM5A–LR	RCP4.5	99	2033	2023	2047	99	17.4505	0.377963	100	2033	0.95	2034	0.04
1698	r2i1p1_IPSL–CM5A–LR_RCP4.5_089.final.csv	[1861.0, 1907, 1935, 1978, 1994, 2004, 2023, 2033, 2047, 2061, 2084, 2100.0]	54	161	1	r2i1p1	IPSL–CM5A–LR	RCP4.5	99	2047	2033	2061	100	20.0774	0.364179	100	2047	0.96	2045	0.04
1699	r2i1p1_IPSL–CM5A–LR_RCP4.5_089.final.csv	[1861.0, 1907, 1935, 1978, 1994, 2004, 2023, 2033, 2047, 2061, 2084, 2100.0]	54	161	1	r2i1p1	IPSL–CM5A–LR	RCP4.5	99	2061	2047	2084	100	19.7776	0.257379	100	2061	0.99	2063	0.01
1700	r2i1p1_IPSL–CM5A–LR_RCP4.5_089.final.csv	[1861.0, 1907, 1935, 1978, 1994, 2004, 2023, 2033, 2047, 2061, 2084, 2100.0]	54	161	1	r2i1p1	IPSL–CM5A–LR	RCP4.5	99	2084	2061	2100	100	21.2749	0.23269	100	2084	0.99	2073	0.01
1701	r2i1p1_IPSL–CM5A–LR_RCP4.5_089.final.csv	[1861.0, 1907, 1935, 1978, 1995, 2020, 2033, 2047, 2061, 2084, 2100.0]	54	162	2	r2i1p1	IPSL–CM5A–LR	RCP4.5	1	1907	1861	1935	100	23.4146	0.161379	100	1907	1	0	0
1702	r2i1p1_IPSL–CM5A–LR_RCP4.5_089.final.csv	[1861.0, 1907, 1935, 1978, 1995, 2020, 2033, 2047, 2061, 2084, 2100.0]	54	162	2	r2i1p1	IPSL–CM5A–LR	RCP4.5	1	1935	1907	1978	100	36.1214	0.219073	100	1935	0.85	1929	0.15
1703	r2i1p1_IPSL–CM5A–LR_RCP4.5_089.final.csv	[1861.0, 1907, 1935, 1978, 1995, 2020, 2033, 2047, 2061, 2084, 2100.0]	54	162	2	r2i1p1	IPSL–CM5A–LR	RCP4.5	1	1978	1935	1995	1	41.813	0.402808	100	1978	0.98	1979	0.02
1704	r2i1p1_IPSL–CM5A–LR_RCP4.5_089.final.csv	[1861.0, 1907, 1935, 1978, 1995, 2020, 2033, 2047, 2061, 2084, 2100.0]	54	162	2	r2i1p1	IPSL–CM5A–LR	RCP4.5	1	1995	1978	2020	1	34.2492	0.641205	1	1995	0.92	1994	0.05
1705	r2i1p1_IPSL–CM5A–LR_RCP4.5_089.final.csv	[1861.0, 1907, 1935, 1978, 1995, 2020, 2033, 2047, 2061, 2084, 2100.0]	54	162	2	r2i1p1	IPSL–CM5A–LR	RCP4.5	1	2020	1995	2033	1	26.4599	0.464145	1	2020	0.93	2023	0.07
1706	r2i1p1_IPSL–CM5A–LR_RCP4.5_089.final.csv	[1861.0, 1907, 1935, 1978, 1995, 2020, 2033, 2047, 2061, 2084, 2100.0]	54	162	2	r2i1p1	IPSL–CM5A–LR	RCP4.5	1	2033	2020	2047	1	19.5547	0.438249	100	2033	0.77	2032	0.18
1707	r2i1p1_IPSL–CM5A–LR_RCP4.5_089.final.csv	[1861.0, 1907, 1935, 1978, 1995, 2020, 2033, 2047, 2061, 2084, 2100.0]	54	162	2	r2i1p1	IPSL–CM5A–LR	RCP4.5	1	2047	2033	2061	100	20.0774	0.364179	100	2047	0.96	2045	0.04
1708	r2i1p1_IPSL–CM5A–LR_RCP4.5_089.final.csv	[1861.0, 1907, 1935, 1978, 1995, 2020, 2033, 2047, 2061, 2084, 2100.0]	54	162	2	r2i1p1	IPSL–CM5A–LR	RCP4.5	1	2061	2047	2084	100	19.7776	0.257379	100	2061	0.99	2063	0.01
1709	r2i1p1_IPSL–CM5A–LR_RCP4.5_089.final.csv	[1861.0, 1907, 1935, 1978, 1995, 2020, 2033, 2047, 2061, 2084, 2100.0]	54	162	2	r2i1p1	IPSL–CM5A–LR	RCP4.5	1	2084	2061	2100	100	21.2749	0.23269	100	2084	0.99	2073	0.01
Seq	Source	BreakSet	DatasetNo	SetNo	SetNoInData	Type	Model	Treat	%BreakSet	Year	Predecessor	Successor	%SegmentFound	Ti	Shift	%YearOverall	ModalYear	ModalValue	SecondModalYear	SecondModalValue
1710	r2i1p1_MIROC5_RCP4.5_095.final.csv	[1861.0, 1921, 1996, 2013, 2031, 2041, 2062, 2100.0]	55	163	1	r2i1p1	MIROC5	RCP4.5	100	1921	1861	1996	100	59.8195	0.270468	100	1921	0.87	1922	0.13
1711	r2i1p1_MIROC5_RCP4.5_095.final.csv	[1861.0, 1921, 1996, 2013, 2031, 2041, 2062, 2100.0]	55	163	1	r2i1p1	MIROC5	RCP4.5	100	1996	1921	2013	100	53.3761	0.504615	100	1996	0.75	1997	0.25
1712	r2i1p1_MIROC5_RCP4.5_095.final.csv	[1861.0, 1921, 1996, 2013, 2031, 2041, 2062, 2100.0]	55	163	1	r2i1p1	MIROC5	RCP4.5	100	2013	1996	2031	100	19.7067	0.391377	100	2013	0.83	2012	0.11
1713	r2i1p1_MIROC5_RCP4.5_095.final.csv	[1861.0, 1921, 1996, 2013, 2031, 2041, 2062, 2100.0]	55	163	1	r2i1p1	MIROC5	RCP4.5	100	2031	2013	2041	100	10.3748	0.272328	100	2026	0.69	2025	0.23
1714	r2i1p1_MIROC5_RCP4.5_095.final.csv	[1861.0, 1921, 1996, 2013, 2031, 2041, 2062, 2100.0]	55	163	1	r2i1p1	MIROC5	RCP4.5	100	2041	2031	2062	100	16.3408	0.333689	100	2041	0.66	2047	0.23
1715	r2i1p1_MIROC5_RCP4.5_095.final.csv	[1861.0, 1921, 1996, 2013, 2031, 2041, 2062, 2100.0]	55	163	1	r2i1p1	MIROC5	RCP4.5	100	2062	2041	2100	100	31.7664	0.377977	100	2062	0.85	2059	0.14
Seq	Source	BreakSet	DatasetNo	SetNo	SetNoInData	Type	Model	Treat	%BreakSet	Year	Predecessor	Successor	%SegmentFound	Ti	Shift	%YearOverall	ModalYear	ModalValue	SecondModalYear	SecondModalValue
1716	r2i1p1_MPI–ESM–LR_RCP4.5_100.final.csv	[1861.0, 1878, 1893, 1908, 1939, 1977, 2003, 2024, 2038, 2050, 2072, 2100.0]	56	164	1	r2i1p1	MPI–ESM–LR	RCP4.5	25	1878	1861	1893	100	23.5982	–0.291869097478	100	1878	0.99	1877	0.01
1717	r2i1p1_MPI–ESM–LR_RCP4.5_100.final.csv	[1861.0, 1878, 1893, 1908, 1939, 1977, 2003, 2024, 2038, 2050, 2072, 2100.0]	56	164	1	r2i1p1	MPI–ESM–LR	RCP4.5	25	1893	1878	1908	100	19.5184	0.216775	100	1893	1	0	0
1718	r2i1p1_MPI–ESM–LR_RCP4.5_100.final.csv	[1861.0, 1878, 1893, 1908, 1939, 1977, 2003, 2024, 2038, 2050, 2072, 2100.0]	56	164	1	r2i1p1	MPI–ESM–LR	RCP4.5	25	1908	1893	1939	100	15.482	0.161446	100	1908	0.58	1906	0.21
1719	r2i1p1_MPI–ESM–LR_RCP4.5_100.final.csv	[1861.0, 1878, 1893, 1908, 1939, 1977, 2003, 2024, 2038, 2050, 2072, 2100.0]	56	164	1	r2i1p1	MPI–ESM–LR	RCP4.5	25	1939	1908	1977	100	33.6061	0.229757	100	1939	0.99	1938	0.01
1720	r2i1p1_MPI–ESM–LR_RCP4.5_100.final.csv	[1861.0, 1878, 1893, 1908, 1939, 1977, 2003, 2024, 2038, 2050, 2072, 2100.0]	56	164	1	r2i1p1	MPI–ESM–LR	RCP4.5	25	1977	1939	2003	25	42.6279	0.397474	100	1977	0.86	1983	0.13
1721	r2i1p1_MPI–ESM–LR_RCP4.5_100.final.csv	[1861.0, 1878, 1893, 1908, 1939, 1977, 2003, 2024, 2038, 2050, 2072, 2100.0]	56	164	1	r2i1p1	MPI–ESM–LR	RCP4.5	25	2003	1977	2024	25	38.4738	0.60428	25	2003	0.68	2002	0.32
1722	r2i1p1_MPI–ESM–LR_RCP4.5_100.final.csv	[1861.0, 1878, 1893, 1908, 1939, 1977, 2003, 2024, 2038, 2050, 2072, 2100.0]	56	164	1	r2i1p1	MPI–ESM–LR	RCP4.5	25	2024	2003	2038	25	24.8557	0.343367	25	2024	0.64	2023	0.36
1723	r2i1p1_MPI–ESM–LR_RCP4.5_100.final.csv	[1861.0, 1878, 1893, 1908, 1939, 1977, 2003, 2024, 2038, 2050, 2072, 2100.0]	56	164	1	r2i1p1	MPI–ESM–LR	RCP4.5	25	2038	2024	2050	25	15.2989	0.333631	100	2038	0.61	2037	0.33
1724	r2i1p1_MPI–ESM–LR_RCP4.5_100.final.csv	[1861.0, 1878, 1893, 1908, 1939, 1977, 2003, 2024, 2038, 2050, 2072, 2100.0]	56	164	1	r2i1p1	MPI–ESM–LR	RCP4.5	25	2050	2038	2072	100	19.5108	0.30919	100	2050	0.97	2051	0.02
1725	r2i1p1_MPI–ESM–LR_RCP4.5_100.final.csv	[1861.0, 1878, 1893, 1908, 1939, 1977, 2003, 2024, 2038, 2050, 2072, 2100.0]	56	164	1	r2i1p1	MPI–ESM–LR	RCP4.5	25	2072	2050	2100	100	17.965	0.203644	100	2072	0.98	2073	0.02
1726	r2i1p1_MPI–ESM–LR_RCP4.5_100.final.csv	[1861.0, 1878, 1893, 1908, 1939, 1977, 2002, 2023, 2038, 2050, 2072, 2100.0]	56	165	2	r2i1p1	MPI–ESM–LR	RCP4.5	75	1878	1861	1893	100	23.5982	–0.291869097478	100	1878	0.99	1877	0.01
1727	r2i1p1_MPI–ESM–LR_RCP4.5_100.final.csv	[1861.0, 1878, 1893, 1908, 1939, 1977, 2002, 2023, 2038, 2050, 2072, 2100.0]	56	165	2	r2i1p1	MPI–ESM–LR	RCP4.5	75	1893	1878	1908	100	19.5184	0.216775	100	1893	1	0	0
1728	r2i1p1_MPI–ESM–LR_RCP4.5_100.final.csv	[1861.0, 1878, 1893, 1908, 1939, 1977, 2002, 2023, 2038, 2050, 2072, 2100.0]	56	165	2	r2i1p1	MPI–ESM–LR	RCP4.5	75	1908	1893	1939	100	15.482	0.161446	100	1908	0.58	1906	0.21
1729	r2i1p1_MPI–ESM–LR_RCP4.5_100.final.csv	[1861.0, 1878, 1893, 1908, 1939, 1977, 2002, 2023, 2038, 2050, 2072, 2100.0]	56	165	2	r2i1p1	MPI–ESM–LR	RCP4.5	75	1939	1908	1977	100	33.6061	0.229757	100	1939	0.99	1938	0.01
1730	r2i1p1_MPI–ESM–LR_RCP4.5_100.final.csv	[1861.0, 1878, 1893, 1908, 1939, 1977, 2002, 2023, 2038, 2050, 2072, 2100.0]	56	165	2	r2i1p1	MPI–ESM–LR	RCP4.5	75	1977	1939	2002	75	41.8762	0.38651	100	1977	0.94	1983	0.06
1731	r2i1p1_MPI–ESM–LR_RCP4.5_100.final.csv	[1861.0, 1878, 1893, 1908, 1939, 1977, 2002, 2023, 2038, 2050, 2072, 2100.0]	56	165	2	r2i1p1	MPI–ESM–LR	RCP4.5	75	2002	1977	2023	75	37.5408	0.592649	75	2002	0.51	2003	0.49
1732	r2i1p1_MPI–ESM–LR_RCP4.5_100.final.csv	[1861.0, 1878, 1893, 1908, 1939, 1977, 2002, 2023, 2038, 2050, 2072, 2100.0]	56	165	2	r2i1p1	MPI–ESM–LR	RCP4.5	75	2023	2002	2038	75	24.7171	0.353581	75	2023	0.65	2024	0.35
1733	r2i1p1_MPI–ESM–LR_RCP4.5_100.final.csv	[1861.0, 1878, 1893, 1908, 1939, 1977, 2002, 2023, 2038, 2050, 2072, 2100.0]	56	165	2	r2i1p1	MPI–ESM–LR	RCP4.5	75	2038	2023	2050	75	16.2499	0.348305	100	2038	0.54	2037	0.35
1734	r2i1p1_MPI–ESM–LR_RCP4.5_100.final.csv	[1861.0, 1878, 1893, 1908, 1939, 1977, 2002, 2023, 2038, 2050, 2072, 2100.0]	56	165	2	r2i1p1	MPI–ESM–LR	RCP4.5	75	2050	2038	2072	100	19.5108	0.30919	100	2050	0.97	2051	0.02
1735	r2i1p1_MPI–ESM–LR_RCP4.5_100.final.csv	[1861.0, 1878, 1893, 1908, 1939, 1977, 2002, 2023, 2038, 2050, 2072, 2100.0]	56	165	2	r2i1p1	MPI–ESM–LR	RCP4.5	75	2072	2050	2100	100	17.965	0.203644	100	2072	0.98	2073	0.02
Seq	Source	BreakSet	DatasetNo	SetNo	SetNoInData	Type	Model	Treat	%BreakSet	Year	Predecessor	Successor	%SegmentFound	Ti	Shift	%YearOverall	ModalYear	ModalValue	SecondModalYear	SecondModalValue
1736	r2i1p1_MPI–ESM–MR_RCP4.5_103.final.csv	[1861.0, 1882, 1898, 1942, 1954, 1976, 1996, 2012, 2036, 2052, 2067, 2100.0]	57	166	1	r2i1p1	MPI–ESM–MR	RCP4.5	100	1882	1861	1898	100	20.8556	–0.239035304983	100	1882	0.95	1883	0.05
1737	r2i1p1_MPI–ESM–MR_RCP4.5_103.final.csv	[1861.0, 1882, 1898, 1942, 1954, 1976, 1996, 2012, 2036, 2052, 2067, 2100.0]	57	166	1	r2i1p1	MPI–ESM–MR	RCP4.5	100	1898	1882	1942	100	27.5888	0.246102	100	1898	0.96	1905	0.04
1738	r2i1p1_MPI–ESM–MR_RCP4.5_103.final.csv	[1861.0, 1882, 1898, 1942, 1954, 1976, 1996, 2012, 2036, 2052, 2067, 2100.0]	57	166	1	r2i1p1	MPI–ESM–MR	RCP4.5	100	1942	1898	1954	100	19.2152	0.196367	100	1942	0.7	1941	0.24
1739	r2i1p1_MPI–ESM–MR_RCP4.5_103.final.csv	[1861.0, 1882, 1898, 1942, 1954, 1976, 1996, 2012, 2036, 2052, 2067, 2100.0]	57	166	1	r2i1p1	MPI–ESM–MR	RCP4.5	100	1954	1942	1976	100	12.9767	0.140904	100	1954	0.95	1955	0.05
1740	r2i1p1_MPI–ESM–MR_RCP4.5_103.final.csv	[1861.0, 1882, 1898, 1942, 1954, 1976, 1996, 2012, 2036, 2052, 2067, 2100.0]	57	166	1	r2i1p1	MPI–ESM–MR	RCP4.5	100	1976	1954	1996	100	18.6782	0.197789	100	1976	0.83	1977	0.17
1741	r2i1p1_MPI–ESM–MR_RCP4.5_103.final.csv	[1861.0, 1882, 1898, 1942, 1954, 1976, 1996, 2012, 2036, 2052, 2067, 2100.0]	57	166	1	r2i1p1	MPI–ESM–MR	RCP4.5	100	1996	1976	2012	100	27.6373	0.437411	100	1996	1	0	0
1742	r2i1p1_MPI–ESM–MR_RCP4.5_103.final.csv	[1861.0, 1882, 1898, 1942, 1954, 1976, 1996, 2012, 2036, 2052, 2067, 2100.0]	57	166	1	r2i1p1	MPI–ESM–MR	RCP4.5	100	2012	1996	2036	100	31.734	0.496234	100	2012	0.98	2015	0.01
1743	r2i1p1_MPI–ESM–MR_RCP4.5_103.final.csv	[1861.0, 1882, 1898, 1942, 1954, 1976, 1996, 2012, 2036, 2052, 2067, 2100.0]	57	166	1	r2i1p1	MPI–ESM–MR	RCP4.5	100	2036	2012	2052	100	25.7927	0.344538	100	2036	0.58	2035	0.2
1744	r2i1p1_MPI–ESM–MR_RCP4.5_103.final.csv	[1861.0, 1882, 1898, 1942, 1954, 1976, 1996, 2012, 2036, 2052, 2067, 2100.0]	57	166	1	r2i1p1	MPI–ESM–MR	RCP4.5	100	2052	2036	2067	100	21.6439	0.332496	100	2052	0.95	2054	0.05
1745	r2i1p1_MPI–ESM–MR_RCP4.5_103.final.csv	[1861.0, 1882, 1898, 1942, 1954, 1976, 1996, 2012, 2036, 2052, 2067, 2100.0]	57	166	1	r2i1p1	MPI–ESM–MR	RCP4.5	100	2067	2052	2100	100	29.767	0.307279	100	2067	0.75	2066	0.24
Seq	Source	BreakSet	DatasetNo	SetNo	SetNoInData	Type	Model	Treat	%BreakSet	Year	Predecessor	Successor	%SegmentFound	Ti	Shift	%YearOverall	ModalYear	ModalValue	SecondModalYear	SecondModalValue
1746	r2i1p2_GISS–E2–H_RCP4.5_053.final.csv	[1861.0, 1899, 1915, 1937, 1962, 1972, 1996, 2012, 2020, 2028, 2037, 2049, 2059, 2070, 2089, 2100.0]	58	167	1	r2i1p2	GISS–E2–H	RCP4.5	61	1899	1861	1915	100	19.0365	0.163284	100	1899	0.59	1898	0.39
1747	r2i1p2_GISS–E2–H_RCP4.5_053.final.csv	[1861.0, 1899, 1915, 1937, 1962, 1972, 1996, 2012, 2020, 2028, 2037, 2049, 2059, 2070, 2089, 2100.0]	58	167	1	r2i1p2	GISS–E2–H	RCP4.5	61	1915	1899	1937	100	22.37	0.155591	100	1915	0.92	1921	0.06
1748	r2i1p2_GISS–E2–H_RCP4.5_053.final.csv	[1861.0, 1899, 1915, 1937, 1962, 1972, 1996, 2012, 2020, 2028, 2037, 2049, 2059, 2070, 2089, 2100.0]	58	167	1	r2i1p2	GISS–E2–H	RCP4.5	61	1937	1915	1962	100	26.651	0.120794	100	1937	0.82	1932	0.1
1749	r2i1p2_GISS–E2–H_RCP4.5_053.final.csv	[1861.0, 1899, 1915, 1937, 1962, 1972, 1996, 2012, 2020, 2028, 2037, 2049, 2059, 2070, 2089, 2100.0]	58	167	1	r2i1p2	GISS–E2–H	RCP4.5	61	1962	1937	1972	100	21.4961	–0.133792597949	100	1962	0.96	1963	0.04
1750	r2i1p2_GISS–E2–H_RCP4.5_053.final.csv	[1861.0, 1899, 1915, 1937, 1962, 1972, 1996, 2012, 2020, 2028, 2037, 2049, 2059, 2070, 2089, 2100.0]	58	167	1	r2i1p2	GISS–E2–H	RCP4.5	61	1972	1962	1996	100	15.5618	0.204484	100	1972	0.91	1971	0.07
1751	r2i1p2_GISS–E2–H_RCP4.5_053.final.csv	[1861.0, 1899, 1915, 1937, 1962, 1972, 1996, 2012, 2020, 2028, 2037, 2049, 2059, 2070, 2089, 2100.0]	58	167	1	r2i1p2	GISS–E2–H	RCP4.5	61	1996	1972	2012	100	31.0342	0.428105	100	1996	0.82	1997	0.18
1752	r2i1p2_GISS–E2–H_RCP4.5_053.final.csv	[1861.0, 1899, 1915, 1937, 1962, 1972, 1996, 2012, 2020, 2028, 2037, 2049, 2059, 2070, 2089, 2100.0]	58	167	1	r2i1p2	GISS–E2–H	RCP4.5	61	2012	1996	2020	100	15.6829	0.255012	100	2012	0.94	2004	0.03
1753	r2i1p2_GISS–E2–H_RCP4.5_053.final.csv	[1861.0, 1899, 1915, 1937, 1962, 1972, 1996, 2012, 2020, 2028, 2037, 2049, 2059, 2070, 2089, 2100.0]	58	167	1	r2i1p2	GISS–E2–H	RCP4.5	61	2020	2012	2028	61	11.6301	0.161066	100	2020	0.94	2019	0.03
1754	r2i1p2_GISS–E2–H_RCP4.5_053.final.csv	[1861.0, 1899, 1915, 1937, 1962, 1972, 1996, 2012, 2020, 2028, 2037, 2049, 2059, 2070, 2089, 2100.0]	58	167	1	r2i1p2	GISS–E2–H	RCP4.5	61	2028	2020	2037	61	11.4328	0.158709	61	2028	0.96	2033	0.03
1755	r2i1p2_GISS–E2–H_RCP4.5_053.final.csv	[1861.0, 1899, 1915, 1937, 1962, 1972, 1996, 2012, 2020, 2028, 2037, 2049, 2059, 2070, 2089, 2100.0]	58	167	1	r2i1p2	GISS–E2–H	RCP4.5	61	2037	2028	2049	61	15.4569	0.237192	61	2037	0.63	2038	0.26
1756	r2i1p2_GISS–E2–H_RCP4.5_053.final.csv	[1861.0, 1899, 1915, 1937, 1962, 1972, 1996, 2012, 2020, 2028, 2037, 2049, 2059, 2070, 2089, 2100.0]	58	167	1	r2i1p2	GISS–E2–H	RCP4.5	61	2049	2037	2059	61	16.1595	0.221011	69	2049	0.96	2046	0.01
1757	r2i1p2_GISS–E2–H_RCP4.5_053.final.csv	[1861.0, 1899, 1915, 1937, 1962, 1972, 1996, 2012, 2020, 2028, 2037, 2049, 2059, 2070, 2089, 2100.0]	58	167	1	r2i1p2	GISS–E2–H	RCP4.5	61	2059	2049	2070	69	15.2729	0.1556	99	2059	0.99	2056	0.01
1758	r2i1p2_GISS–E2–H_RCP4.5_053.final.csv	[1861.0, 1899, 1915, 1937, 1962, 1972, 1996, 2012, 2020, 2028, 2037, 2049, 2059, 2070, 2089, 2100.0]	58	167	1	r2i1p2	GISS–E2–H	RCP4.5	61	2070	2059	2089	96	19.4234	0.103423	97	2070	1	0	0
1759	r2i1p2_GISS–E2–H_RCP4.5_053.final.csv	[1861.0, 1899, 1915, 1937, 1962, 1972, 1996, 2012, 2020, 2028, 2037, 2049, 2059, 2070, 2089, 2100.0]	58	167	1	r2i1p2	GISS–E2–H	RCP4.5	61	2089	2070	2100	97	18.7046	0.108936	97	2089	0.85	2084	0.11
1760	r2i1p2_GISS–E2–H_RCP4.5_053.final.csv	[1861.0, 1899, 1915, 1937, 1962, 1972, 1996, 2012, 2020, 2033, 2042, 2049, 2059, 2070, 2089, 2100.0]	58	168	2	r2i1p2	GISS–E2–H	RCP4.5	4	1899	1861	1915	100	19.0365	0.163284	100	1899	0.59	1898	0.39
1761	r2i1p2_GISS–E2–H_RCP4.5_053.final.csv	[1861.0, 1899, 1915, 1937, 1962, 1972, 1996, 2012, 2020, 2033, 2042, 2049, 2059, 2070, 2089, 2100.0]	58	168	2	r2i1p2	GISS–E2–H	RCP4.5	4	1915	1899	1937	100	22.37	0.155591	100	1915	0.92	1921	0.06
1762	r2i1p2_GISS–E2–H_RCP4.5_053.final.csv	[1861.0, 1899, 1915, 1937, 1962, 1972, 1996, 2012, 2020, 2033, 2042, 2049, 2059, 2070, 2089, 2100.0]	58	168	2	r2i1p2	GISS–E2–H	RCP4.5	4	1937	1915	1962	100	26.651	0.120794	100	1937	0.82	1932	0.1
1763	r2i1p2_GISS–E2–H_RCP4.5_053.final.csv	[1861.0, 1899, 1915, 1937, 1962, 1972, 1996, 2012, 2020, 2033, 2042, 2049, 2059, 2070, 2089, 2100.0]	58	168	2	r2i1p2	GISS–E2–H	RCP4.5	4	1962	1937	1972	100	21.4961	–0.133792597949	100	1962	0.96	1963	0.04
1764	r2i1p2_GISS–E2–H_RCP4.5_053.final.csv	[1861.0, 1899, 1915, 1937, 1962, 1972, 1996, 2012, 2020, 2033, 2042, 2049, 2059, 2070, 2089, 2100.0]	58	168	2	r2i1p2	GISS–E2–H	RCP4.5	4	1972	1962	1996	100	15.5618	0.204484	100	1972	0.91	1971	0.07
1765	r2i1p2_GISS–E2–H_RCP4.5_053.final.csv	[1861.0, 1899, 1915, 1937, 1962, 1972, 1996, 2012, 2020, 2033, 2042, 2049, 2059, 2070, 2089, 2100.0]	58	168	2	r2i1p2	GISS–E2–H	RCP4.5	4	1996	1972	2012	100	31.0342	0.428105	100	1996	0.82	1997	0.18
1766	r2i1p2_GISS–E2–H_RCP4.5_053.final.csv	[1861.0, 1899, 1915, 1937, 1962, 1972, 1996, 2012, 2020, 2033, 2042, 2049, 2059, 2070, 2089, 2100.0]	58	168	2	r2i1p2	GISS–E2–H	RCP4.5	4	2012	1996	2020	100	15.6829	0.255012	100	2012	0.94	2004	0.03
[truncated: 1,484 more rows]

## Sheet: TS-RCP45
years		r10i1p1_CSIRO–Mk3–6–0	r10i1p1_CSIRO–Mk3–6–0	r10i1p1_CSIRO–Mk3–6–0	r10i1p1_CSIRO–Mk3–6–0	r12i1p1_EC–EARTH	r12i1p1_EC–EARTH	r12i1p1_EC–EARTH	r12i1p1_EC–EARTH	r1i1p1_ACCESS1–0	r1i1p1_ACCESS1–0	r1i1p1_ACCESS1–0	r1i1p1_ACCESS1–0	r1i1p1_ACCESS1–3	r1i1p1_ACCESS1–3	r1i1p1_ACCESS1–3	r1i1p1_ACCESS1–3	r1i1p1_BNU–ESM	r1i1p1_BNU–ESM	r1i1p1_BNU–ESM	r1i1p1_BNU–ESM	r1i1p1_CCSM4	r1i1p1_CCSM4	r1i1p1_CCSM4	r1i1p1_CCSM4	r1i1p1_CESM1–BGC	r1i1p1_CESM1–BGC	r1i1p1_CESM1–BGC	r1i1p1_CESM1–BGC	r1i1p1_CESM1–CAM5	r1i1p1_CESM1–CAM5	r1i1p1_CESM1–CAM5	r1i1p1_CESM1–CAM5	r1i1p1_CMCC–CMS	r1i1p1_CMCC–CMS	r1i1p1_CMCC–CMS	r1i1p1_CMCC–CMS	r1i1p1_CMCC–CM	r1i1p1_CMCC–CM	r1i1p1_CMCC–CM	r1i1p1_CMCC–CM	r1i1p1_CNRM–CM5	r1i1p1_CNRM–CM5	r1i1p1_CNRM–CM5	r1i1p1_CNRM–CM5	r1i1p1_CSIRO–Mk3–6–0	r1i1p1_CSIRO–Mk3–6–0	r1i1p1_CSIRO–Mk3–6–0	r1i1p1_CSIRO–Mk3–6–0
[truncated: 1,514 more rows]
[truncated: 380 more columns]

[truncated: 6 more sheets: RCP45 Summary, RCP45 Shift-trend, RCP26 Summary, RCP60 Summary, RCP85 Summary, HadGEM-ES Chart]
