# Supplementary material for: Reconciling the signal and noise of atmospheric warming on decadal timescales
Source: Copernicus journal article supplement (doi:10.5194/esd-2016-35), 2016-08-23
Supplement: Supplementary file 2 [file Obs_output_step_data-Jones&Ricketts.xlsx]

## Sheet: File Guide
Tab	Description
Summary diagram	Figure 1 table and data. Figure 5a is also here
Summary steps	Step changes and dates in Figure 1 (They are also buried in Figure 1)
Annual chart Fig 2	Figure 2 and data
Sat-surf Chart Fig 3	Figure 3 and data
HadCRUT.4.3.0.0.annual	Multi-step MYBT output
TS-HadCRUT.4.3.0.0	Time series for the above
Readme HadCRUT.4.3.0.0	Download info and details
HadSST3.1.1.0 annual	Multi-step MYBT output
TS-HadSST3.1.1.0	Time series for the above
Readme HadSST3.1.1.0	Download info and details
CRUtem4 annual	Multi-step MYBT output
TS-CRUtem4	Time series for the above
Readme CRUtem4	Download info and details
NCDC-All-Zones annual	Multi-step MYBT output
TS-NCDC-All-Zones	Time series for the above
Readme NCDC-All-Zones	Download info and details
GISS annual	Multi-step MYBT output
TS-GISS	Time series for the above
COWTAN-WAY-3	Multi-step MYBT output
TS-C&W	Time series for the above
BERKELEY-3	Multi-step MYBT output
TS-BEST	Time series for the above
SEA Obs CRU	Inverse calculations for regional attribution
SEA TavARW Results	Step and trend data and figure
CET Obs CRU	Inverse calculations for regional attribution
CET TavARW Results	Step and trend data and figure
Texas Obs CRU	Inverse calculations for regional attribution
Texas TavARW Results	Step and trend data and figure

## Sheet: Summary diagram
This data file contains step changes from the the observed surface temperature records as analysed by the multi-step Moranno-Yohai bivariate test (MYBT) for the paper Reconciling the signal and noise of atmospheric warming on decadal timescales (Jones and Ricketts, 2016). This worksheet contains the compiled step changes from the other worksheets in this file. The next worksheet contains the data…
		1880										1890										1900										1910										1920
		1880	1881	1882	1883	1884	1885	1886	1887	1888	1889	1890	1891	1892	1893	1894	1895	1896	1897	1898	1899	1900	1901	1902	1903	1904	1905	1906	1907	1908	1909	1910	1911	1912	1913	1914	1915	1916	1917	1918	1919	1920	1921	1922	1923	1924	1925	1926	1927
Global	GISS																							-0.128732																		0.179946
	HadCRU
	NCDC
	BEST																																										0.149697
	C&W																																									0.158894
Global ocean	HadSST
	ERSST											-0.15339
Global land	CRUtem																																									0.329316
	NCDC																																														0.306875
Northern hemisphere	GISS																																													0.332472
	HadCRU																																														0.272401
	NCDC																																														0.294862
NH Ocean	HadSST NH																							-0.211472																			0.256608
	ERSST NH																								-0.184747																							0.359418
NH Land	CRUtem NH																																									0.361853
	NCDC land NH																																										0.335385
Southern hemisphere	GISS											-0.161495
	HadCRU
	NCDC											-0.151603
SH ocean	HadSST SH
	ERSST SH											-0.15638
SH land	CRUtemp SH																																	0.214688
	NCDC land SH
Tropics	HadCRU																																															0.221204
	NCDC 20S-20N
	GISS 24S-24N																								-0.164837																							0.307931
Tropics ocean	HADSST																																															0.213082
NH tropics	GISS 0-24N																									-0.183326																						0.345089
	NCDC 0-30N																									-0.176362																						0.340018
NH mid lat	GISS 24N-44N
	NCDC 30N-60N																																										0.330105
	GISS 44N-64N																																									0.394331
NH High lat	NCDC 60N-90N																																									0.427068
	GISS 64N-90N																								0.483953																	0.786048
SH tropics	GISS 0-24S
	NCDC 0-30S
SH mid lats	GISS 24S-44S								-0.182251
	NCDC 30S-60S								-0.246401
	GISS 44S-64S								-0.269673																	-0.132275
SH high lats	GISS 64S-90S																																	-0.691052
Other latitudinal zones	NCDC 60N-60S																								-0.195936											0.146127											0.114895
	NCDC 20N-90N																																														0.31012
	GISS 24N-90N																																										0.387567
	NCDC20S-90S																																														0.31012
	GISS 24S-90S								-0.18282													-0.0834807
		1880										1890										1900										1910										1920
Global	GISS																							-0.128732																		0.179946
	HadCRU
	NCDC
	BEST																																										0.149697
	C&W																																									0.158894
Global ocean	HadSST
	ERSST											-0.15339
Global land	CRUtem																																									0.329316
	NCDC																																														0.306875
Northern hemisphere	GISS																																													0.332472
	HadCRU																																														0.272401
	NCDC																																														0.294862
NH Ocean	HadSST NH																							-0.211472																			0.256608
	ERSST NH																								-0.184747																							0.359418
NH Land	CRUtem NH																																									0.361853
	NCDC land NH																																										0.335385
Southern hemisphere	GISS											-0.161495
	HadCRU
	NCDC											-0.151603
SH ocean	HadSST SH
	ERSST SH											-0.15638
SH land	CRUtem SH																																	0.214688
	NCDC land SH
Tropics	HadCRU																																															0.221204
	NCDC 20S–20N
	GISS 24S–24N																								-0.164837																							0.307931
Tropic ocean	HadSST																																															0.213082
NH tropics	GISS 0–24N																									-0.183326																						0.345089
	NCDC 0–30N																									-0.176362																						0.340018
NH mid lat	GISS 24N–44N
	NCDC 30N–60N																																										0.330105
	GISS 44N–64N																																									0.394331
NH High lat	NCDC 60N–90N																																									0.427068
	GISS 64N–90N																								0.483953																	0.786048
SH tropics	GISS 0–24S
	NCDC 0–30S
SH mid lats	GISS 24S–44S								-0.182251
	NCDC 30S–60S								-0.246401
	GISS 44S–64S								-0.269673																	-0.132275
SH high lats	GISS 64S–90S																																	-0.691052
Other latitudinal zones	NCDC 60N–60S																								-0.195936											0.146127											0.114895
	NCDC 20N–90N																																														0.31012
	GISS 24N–90N																																										0.387567
	NCDC 20S–90S																																														0.31012
	GISS 24S–90S								-0.18282													-0.0834807
		0	0	0	0	0	0	0	-0.881144	0	0	-0.622868	0	0	0	0	0	0	0	0	0	-0.0834807	0	-0.340204	-0.0615685	-0.491962	0	0	0	0	0	0	0	-0.476364	0	0.146127	0	0	0	0	0	2.63746	1.45936	0	0	0.332472	1.60927	1.78674	0
[truncated: 87 more columns]

## Sheet: Summary steps
Land	Global					Global ocean		Global land		Northern hemisphere			NH Ocean		NH Land		Southern hemisphere			SH ocean		SH land		Tropics			Trop Ocean	NH tropics		NH mid lat			NH High lat		SH tropics		SH mid lats			SH high lats	Other latitudinal zones						Land	Global
Year	GISS	HadCRU	NCDC	BEST	C&W	HadSST	ERSST	CRUtem	NCDC	GISS	HadCRU	NCDC	HadSST NH	ERSST NH	CRUtem NH	NCDC land NH	GISS	HadCRU	NCDC	HadSST SH	ERSST SH	CRUtemp SH	NCDC land SH	HadCRU	NCDC 20S-20N	GISS 24S-24N	Had SST	GISS 0-24N	NCDC 0-30N	GISS 24N-44N	NCDC 30N-60N	GISS 44N-64N	NCDC 60N-90N	GISS 64N-90N	GISS 0-24S	NCDC 0-30S	GISS 24S-44S	NCDC 30S-60S	GISS 44S-64S	GISS 64S-90S	NCDC 60N-60S	NCDC 20N-90N	GISS 24N-90N	NCDC20S-90S	GISS 24S-90S		Year	GISS	HadCRU
1880	0	0	0	0	0	0	0	0	0	0	0	0	0	0	0	0	0	0	0	0	0	0	0	0	0	0	0	0	0	0	0	0	0	0	0	0	0	0	0	0	0	0	0	0	0		1880
1881	0	0	0	0	0	0	0	0	0	0	0	0	0	0	0	0	0	0	0	0	0	0	0	0	0	0	0	0	0	0	0	0	0	0	0	0	0	0	0	0	0	0	0	0	0		1881
1882	0	0	0	0	0	0	0	0	0	0	0	0	0	0	0	0	0	0	0	0	0	0	0	0	0	0	0	0	0	0	0	0	0	0	0	0	0	0	0	0	0	0	0	0	0		1882
1883	0	0	0	0	0	0	0	0	0	0	0	0	0	0	0	0	0	0	0	0	0	0	0	0	0	0	0	0	0	0	0	0	0	0	0	0	0	0	0	0	0	0	0	0	0		1883
1884	0	0	0	0	0	0	0	0	0	0	0	0	0	0	0	0	0	0	0	0	0	0	0	0	0	0	0	0	0	0	0	0	0	0	0	0	0	0	0	0	0	0	0	0	0		1884
1885	0	0	0	0	0	0	0	0	0	0	0	0	0	0	0	0	0	0	0	0	0	0	0	0	0	0	0	0	0	0	0	0	0	0	0	0	0	0	0	0	0	0	0	0	0		1885
1886	0	0	0	0	0	0	0	0	0	0	0	0	0	0	0	0	0	0	0	0	0	0	0	0	0	0	0	0	0	0	0	0	0	0	0	0	-0.182251	-0.246401	-0.269673	0	0	0	0	0	-0.18282		1886
1887	0	0	0	0	0	0	0	0	0	0	0	0	0	0	0	0	0	0	0	0	0	0	0	0	0	0	0	0	0	0	0	0	0	0	0	0	0	0	0	0	0	0	0	0	0		1887
1888	0	0	0	0	0	0	0	0	0	0	0	0	0	0	0	0	0	0	0	0	0	0	0	0	0	0	0	0	0	0	0	0	0	0	0	0	0	0	0	0	0	0	0	0	0		1888
1889	0	0	0	0	0	0	-0.15339	0	0	0	0	0	0	0	0	0	-0.161495	0	-0.151603	0	-0.15638	0	0	0	0	0	0	0	0	0	0	0	0	0	0	0	0	0	0	0	0	0	0	0	0		1889
1890	0	0	0	0	0	0	0	0	0	0	0	0	0	0	0	0	0	0	0	0	0	0	0	0	0	0	0	0	0	0	0	0	0	0	0	0	0	0	0	0	0	0	0	0	0		1890
1891	0	0	0	0	0	0	0	0	0	0	0	0	0	0	0	0	0	0	0	0	0	0	0	0	0	0	0	0	0	0	0	0	0	0	0	0	0	0	0	0	0	0	0	0	0		1891
1892	0	0	0	0	0	0	0	0	0	0	0	0	0	0	0	0	0	0	0	0	0	0	0	0	0	0	0	0	0	0	0	0	0	0	0	0	0	0	0	0	0	0	0	0	0		1892
1893	0	0	0	0	0	0	0	0	0	0	0	0	0	0	0	0	0	0	0	0	0	0	0	0	0	0	0	0	0	0	0	0	0	0	0	0	0	0	0	0	0	0	0	0	0		1893
1894	0	0	0	0	0	0	0	0	0	0	0	0	0	0	0	0	0	0	0	0	0	0	0	0	0	0	0	0	0	0	0	0	0	0	0	0	0	0	0	0	0	0	0	0	0		1894
1895	0	0	0	0	0	0	0	0	0	0	0	0	0	0	0	0	0	0	0	0	0	0	0	0	0	0	0	0	0	0	0	0	0	0	0	0	0	0	0	0	0	0	0	0	0		1895
1896	0	0	0	0	0	0	0	0	0	0	0	0	0	0	0	0	0	0	0	0	0	0	0	0	0	0	0	0	0	0	0	0	0	0	0	0	0	0	0	0	0	0	0	0	0		1896
1897	0	0	0	0	0	0	0	0	0	0	0	0	0	0	0	0	0	0	0	0	0	0	0	0	0	0	0	0	0	0	0	0	0	0	0	0	0	0	0	0	0	0	0	0	0		1897
1898	0	0	0	0	0	0	0	0	0	0	0	0	0	0	0	0	0	0	0	0	0	0	0	0	0	0	0	0	0	0	0	0	0	0	0	0	0	0	0	0	0	0	0	0	0		1898
1899	0	0	0	0	0	0	0	0	0	0	0	0	0	0	0	0	0	0	0	0	0	0	0	0	0	0	0	0	0	0	0	0	0	0	0	0	0	0	0	0	0	0	0	0	-0.0834807		1899
1900	0	0	0	0	0	0	0	0	0	0	0	0	0	0	0	0	0	0	0	0	0	0	0	0	0	0	0	0	0	0	0	0	0	0	0	0	0	0	0	0	0	0	0	0	0		1900
1901	-0.128732	0	0	0	0	0	0	0	0	0	0	0	-0.211472	0	0	0	0	0	0	0	0	0	0	0	0	0	0	0	0	0	0	0	0	0	0	0	0	0	0	0	0	0	0	0	0		1901	-0.128732
1902	0	0	0	0	0	0	0	0	0	0	0	0	0	-0.184747	0	0	0	0	0	0	0	0	0	0	0	-0.164837	0	0	0	0	0	0	0	0.483953	0	0	0	0	0	0	-0.195936	0	0	0	0		1902
1903	0	0	0	0	0	0	0	0	0	0	0	0	0	0	0	0	0	0	0	0	0	0	0	0	0	0	0	-0.183326	-0.176362	0	0	0	0	0	0	0	0	0	-0.132275	0	0	0	0	0	0		1903
1904	0	0	0	0	0	0	0	0	0	0	0	0	0	0	0	0	0	0	0	0	0	0	0	0	0	0	0	0	0	0	0	0	0	0	0	0	0	0	0	0	0	0	0	0	0		1904
1905	0	0	0	0	0	0	0	0	0	0	0	0	0	0	0	0	0	0	0	0	0	0	0	0	0	0	0	0	0	0	0	0	0	0	0	0	0	0	0	0	0	0	0	0	0		1905
1906	0	0	0	0	0	0	0	0	0	0	0	0	0	0	0	0	0	0	0	0	0	0	0	0	0	0	0	0	0	0	0	0	0	0	0	0	0	0	0	0	0	0	0	0	0		1906
1907	0	0	0	0	0	0	0	0	0	0	0	0	0	0	0	0	0	0	0	0	0	0	0	0	0	0	0	0	0	0	0	0	0	0	0	0	0	0	0	0	0	0	0	0	0		1907
1908	0	0	0	0	0	0	0	0	0	0	0	0	0	0	0	0	0	0	0	0	0	0	0	0	0	0	0	0	0	0	0	0	0	0	0	0	0	0	0	0	0	0	0	0	0		1908
1909	0	0	0	0	0	0	0	0	0	0	0	0	0	0	0	0	0	0	0	0	0	0	0	0	0	0	0	0	0	0	0	0	0	0	0	0	0	0	0	0	0	0	0	0	0		1909
1910	0	0	0	0	0	0	0	0	0	0	0	0	0	0	0	0	0	0	0	0	0	0	0	0	0	0	0	0	0	0	0	0	0	0	0	0	0	0	0	0	0	0	0	0	0		1910
1911	0	0	0	0	0	0	0	0	0	0	0	0	0	0	0	0	0	0	0	0	0	0.214688	0	0	0	0	0	0	0	0	0	0	0	0	0	0	0	0	0	-0.691052	0	0	0	0	0		1911
1912	0	0	0	0	0	0	0	0	0	0	0	0	0	0	0	0	0	0	0	0	0	0	0	0	0	0	0	0	0	0	0	0	0	0	0	0	0	0	0	0	0	0	0	0	0		1912
1913	0	0	0	0	0	0	0	0	0	0	0	0	0	0	0	0	0	0	0	0	0	0	0	0	0	0	0	0	0	0	0	0	0	0	0	0	0	0	0	0	0.146127	0	0	0	0		1913
1914	0	0	0	0	0	0	0	0	0	0	0	0	0	0	0	0	0	0	0	0	0	0	0	0	0	0	0	0	0	0	0	0	0	0	0	0	0	0	0	0	0	0	0	0	0		1914
1915	0	0	0	0	0	0	0	0	0	0	0	0	0	0	0	0	0	0	0	0	0	0	0	0	0	0	0	0	0	0	0	0	0	0	0	0	0	0	0	0	0	0	0	0	0		1915
1916	0	0	0	0	0	0	0	0	0	0	0	0	0	0	0	0	0	0	0	0	0	0	0	0	0	0	0	0	0	0	0	0	0	0	0	0	0	0	0	0	0	0	0	0	0		1916
1917	0	0	0	0	0	0	0	0	0	0	0	0	0	0	0	0	0	0	0	0	0	0	0	0	0	0	0	0	0	0	0	0	0	0	0	0	0	0	0	0	0	0	0	0	0		1917
1918	0	0	0	0	0	0	0	0	0	0	0	0	0	0	0	0	0	0	0	0	0	0	0	0	0	0	0	0	0	0	0	0	0	0	0	0	0	0	0	0	0	0	0	0	0		1918
1919	0.179946	0	0	0	0.158894	0	0	0.329316	0	0	0	0	0	0	0.361853	0	0	0	0	0	0	0	0	0	0	0	0	0	0	0	0	0.394331	0.427068	0.786048	0	0	0	0	0	0	0	0	0	0	0		1919	0.179946
1920	0	0	0	0.149697	0	0	0	0	0	0	0	0	0.256608	0	0	0.335385	0	0	0	0	0	0	0	0	0	0	0	0	0	0	0.330105	0	0	0	0	0	0	0	0	0	0	0	0.387567	0	0		1920
1921	0	0	0	0	0	0	0	0	0	0	0	0	0	0	0	0	0	0	0	0	0	0	0	0	0	0	0	0	0	0	0	0	0	0	0	0	0	0	0	0	0	0	0	0	0		1921
1922	0	0	0	0	0	0	0	0	0	0	0	0	0	0	0	0	0	0	0	0	0	0	0	0	0	0	0	0	0	0	0	0	0	0	0	0	0	0	0	0	0	0	0	0	0		1922
1923	0	0	0	0	0	0	0	0	0	0.332472	0	0	0	0	0	0	0	0	0	0	0	0	0	0	0	0	0	0	0	0	0	0	0	0	0	0	0	0	0	0	0	0	0	0	0		1923
1924	0	0	0	0	0	0	0	0	0.306875	0	0.272401	0.294862	0	0	0	0	0	0	0	0	0	0	0	0	0	0	0	0	0	0	0	0	0	0	0	0	0	0	0	0	0.114895	0.31012	0	0.31012	0		1924
1925	0	0	0	0	0	0	0	0	0	0	0	0	0	0.359418	0	0	0	0	0	0	0	0	0	0.221204	0	0.307931	0.213082	0.345089	0.340018	0	0	0	0	0	0	0	0	0	0	0	0	0	0	0	0		1925
1926	0	0	0	0	0	0	0	0	0	0	0	0	0	0	0	0	0	0	0	0	0	0	0	0	0	0	0	0	0	0	0	0	0	0	0	0	0	0	0	0	0	0	0	0	0		1926
1927	0	0	0	0	0	0	0	0	0	0	0	0	0	0	0	0	0	0	0	0	0	0	0	0	0	0	0	0	0	0	0	0	0	0	0	0	0	0	0	0	0	0	0	0	0		1927
1928	0	0	0	0	0	0	0	0	0	0	0	0	0	0	0	0	0	0	0	0	0	0	0	0	0	0	0	0	0	0	0	0	0	0	0	0	0	0	0	0	0	0	0	0	0		1928
1929	0	0.260131	0.256068	0	0	0	0.273508	0	0	0	0	0	0	0	0	0	0	0	0	0	0	0	0	0	0	0	0	0	0	0.277742	0	0	0	0	0	0	0	0	0	0	0	0	0	0	0		1929		0.260131
1930	0	0	0	0	0	0	0	0	0	0	0	0	0	0	0	0	0	0	0	0	0	0	0	0	0	0	0	0	0	0	0	0	0	0	0	0	0	0	0	0	0	0	0	0	0		1930
1931	0	0	0	0	0	0	0	0	0	0	0	0	0	0	0	0	0	0	0	0	0	0	0	0	0	0	0	0	0	0	0	0	0	0	0	0	0	0	0	0	0	0	0	0	0		1931
1932	0	0	0	0	0	0	0	0	0	0	0	0	0	0	0	0	0	0	0	0	0	0	0	0	0	0	0	0	0	0	0	0	0	0	0	0	0.218767	0	0	0	0	0	0	0	0		1932
1933	0	0	0	0	0	0	0	0	0	0	0	0	0	0	0	0	0	0	0	0	0	0	0	0	0	0	0	0	0	0	0	0	0	0	0	0	0	0	0	0	0	0	0	0	0		1933
1934	0	0	0	0	0	0	0	0	0	0	0	0	0	0	0	0	0	0	0	0	0	0	0	0	0	0	0	0	0	0	0	0	0	0	0	0	0	0	0	0	0	0	0	0	0		1934
1935	0	0	0	0	0	0.279393	0	0	0	0	0	0	0.178548	0	0	0	0	0	0	0	0	0.168765	0	0	0.229651	0	0	0	0	0	0	0	0	0	0	0	0	0	0	0	0	0	0	0	0		1935
1936	0.180388	0	0	0.19125	0.159281	0	0	0	0	0	0	0	0	0	0	0	0.206958	0.270008	0.226764	0.281372	0.222538	0	0.194589	0	0	0	0	0	0	0	0	0	0	0	0.20467	0.220193	0	0.24932	0.217998	0	0.156708	0	0	0	0.23519		1936	0.180388
1937	0	0	0	0	0	0	0	0	0	0	0	0	0	0	0	0	0	0	0	0	0	0	0	0	0	0	0	0	0	0	0	0	0	0	0	0	0	0	0	0	0	0	0	0	0		1937
1938	0	0	0	0	0	0	0	0	0	0	0	0	0	0	0	0	0	0	0	0	0	0	0	0	0	0	0	0	0	0	0	0	0	0	0	0	0	0	0	0	0	0	0	0	0		1938
1939	0	0	0	0	0	0	0	0	0	0	0	0	0	0	0	0	0	0	0	0	0	0	0	0	0	0	0	0	0	0	0	0	0	0	0	0	0	0	0	0	0	0	0	0	0		1939
1940	0	0	0	0	0	0	0	0	0	0	0	0	0	0	0	0	0	0	0	0	0	0	0	0	0	0	0	0	0	0	0	0	0	0	0	0	0	0	0	0	0	0	0	0	0		1940
1941	0	0	0	0	0	0	0	0	0	0	0	0	0	0	0	0	0	0	0	0	0	0	0	0	0	0	0	0	0	0	0	0	0	0	0	0	0	0	0	0	0	0	0	0	0		1941
1942	0	0	0	0	0	0	0	0	0	0	0	0	0	0	0	0	0	0	0	0	0	0	0	0	0	0	0	0	0	0	0	0	0	0	0	0	0	0	0	0	0	0	0	0	0		1942
1943	0	0	0	0	0	0	0	0	0	0	0	0	0	0	0	0	0	0	0	0	0	0	0	0	0	0	0	0	0	0	0	0	0	0	0	0	0	0	0	0	0	0	0	0	0		1943
1944	0	0	0	0	0	0	0	0	0	0	0	0	0	0	0	0	0	0	0	0	0	0	0	0	0	0	0	0	0	0	0	0	0	0	0	0	0	0	0	0	0	0	0	0	0		1944
1945	0	0	0	0	0	0	0	0	0	0	0	0	0	0	0	0	0	0	0	0	0	0	0	0	0	0	0	0	0	0	0	0	0	0	0	0	0	0	0	0	0	0	0	0	0		1945
1946	0	0	0	0	0	0	0	0	0	0	0	0	0	0	0	0	0	0	0	0	0	0	0	0	0	0	0	0	0	0	0	0	0	0	0	0	0	0	0	0	0	0	0	0	0		1946
1947	0	0	0	0	0	0	0	0	0	0	0	0	0	0	0	0	0	0	0	0	0	0	0	0	0	0	0	0	0	0	0	0	0	0	0	0	0	0	0	0	0	0	0	0	0		1947
1948	0	0	0	0	0	0	0	0	0	0	0	0	0	0	0	0	0	0	0	0	0	0	0	0	0	0	0	0	0	0	0	0	0	0	0	0	0	0	0	0	0	0	0	0	0		1948
1949	0	0	0	0	0	0	0	0	0	0	0	0	0	0	0	0	0	0	0	0	0	0	0	0	0	0	0	0	0	0	0	0	0	0	0	0	0	0	0	0	0	0	0	0	0		1949
1950	0	0	0	0	0	0	0	0	0	0	0	0	0	0	0	0	0	0	0	0	0	0	0	0	0	0	0	0	0	0	0	0	0	0	0	0	0	0	0	0	0	0	0	0	0		1950
1951	0	0	0	0	0	0	0	0	0	0	0	0	0	0	0	0	0	0	0	0	0	0	0	0	0	0	0	0	0	0	0	0	0	0	0	0	0	0	0.0899052	0	0	0	0	0	0		1951
1952	0	0	0	0	0	0	0	0	0	0	0	0	0	0	0	0	0	0	0	0	0	0	0	0	0	0	0	0	0	0	0	0	0	0	0	0	0	0	0	0	0	0	0	0	0		1952
1953	0	0	0	0	0	0	0	0	0	0	0	0	0	0	0	0	0	0	0	0	0	0	0	0	0	0	0	0	0	0	0	0	0	0	0	0	0	0	0	0	0	0	0	0	0		1953
1954	0	0	0	0	0	0	0	0	0	0	0	0	0	0	0	0	0	0	0	0	0	0	0	0	0	0	0	0	0	0	0	0	0	0	0	0	0	0	0	0.763161	0	0	0	0	0		1954
1955	0	0	0	0	0	0	0	0	0	0	0	0	0	0	0	0	0	0	0	0	0	0	0	0	0	0	0	0	0	0	0	0	0	0	0	0	0	0	0	0	0	0	0	0	0		1955
1956	0	0	0	0	0	0	0	0	0	0	0	0	0	0	0	0	0	0	0	0	0	0	0.195429	0	0	0	0	0	0	0	0	0	0	0	0	0	0	0	0	0	0	0	0	0	0		1956
1957	0	0	0	0	0	0	0	0	0	0	0	0	0	0	0	0	0	0	0	0	0	0	0	0	0	0	0	0	0	0	0	0	0	0	0	0	0	0	0	0	0	0	0	0	0		1957
1958	0	0	0	0	0	0	0	0	0	0	0	0	0	0	0	0	0	0	0	0	0	0	0	0	0	0	0	0	0	0	0	0	0	0	0	0	0	0	0	0	0	0	0	0	0		1958
1959	0	0	0	0	0	0	0	0	0	0	0	0	0	0	0	0	0	0	0	0	0	0	0	0	0	0	0	0	0	0	0	0	0	0	0	0	0	0	0	0	0	0	0	0	0		1959
1960	0	0	0	0	0	0	0	0	0	0	0	0	0	0	0	0	0	0	0	0	0	0	0	0	0	0	0	0	0	0	0	0	0	0	0	0	0	0	0	0	0	0	0	0	0		1960
1961	0	0	0	0	0	0	0	0	0	0	0	0	0	0	0	0	0	0	0	0	0	0	0	0	0	0	0	0	0	0	0	0	0	0	0	0	0	0	0	0	0	0	0	0	0		1961
1962	0	0	0	0	0	0	0	0	0	0	0	0	0	0	0	0	0	0	0	0	0	0	0	0	0	0	0	0	0	0	0	0	0	0	0	0	0	0	0	0	0	0	0	0	0		1962
1963	0	0	0	0	0	0	0	0	0	0	0	0	0	0	0	0	0	0	0	0	0	0	0	0	0	0	0	0	0	-0.126082	0	0	0	0	0	0	0	0	0	0	0	0	0	0	0		1963
1964	0	0	0	0	0	0	0	0	0	0	0	0	0	0	0	0	0	0	0	0	0	0	0	0	0	0	0	0	0	0	0	0	0	0	0	0	0	0	0	0	0	0	0	0	0		1964
1965	0	0	0	0	0	0	0	0	0	0	0	0	0	0	0	0	0	0	0	0	0	0	0	0	0	0	0	0	0	0	0	0	0	0	0	0	0	0	0	0	0	0	0	0	0		1965
1966	0	0	0	0	0	0	0	0	0	0	0	0	0	0	0	0	0	0	0	0	0	0	0	0	0	0	0	0	0	0	0	0	0	0	0	0	0	0	0	0	0	0	0	0	0		1966
1967	0	0	0	0	0	0	0	0	0	0	0	0	0	0	0	0	0	0	0	0	0	0	0	0	0	0	0	0	0	0	0	0	0	0	0	0	0	0.204616	0.136089	0	0	0	0	0	0		1967
1968	0	0	0	0	0	0	0	0	0	0	0	0	0	0	0	0	0.190901	0	0.181852	0	0.17745	0	0	0	0	0	0	0	0	0	0	0	0	0	0	0	0	0	0	0	0	0	0	0	0		1968
1969	0	0	0	0	0	0	0	0	0	0	0	0	0	0	0	0	0	0	0	0	0	0	0	0	0	0	0	0	0	0	0	0	0	0	0	0	0.265612	0	0	0	0	0	0	0	0.307581		1969
1970	0	0	0	0	0	0	0	0	0	0	0	0	0	0	0	0	0	0	0	0	0	0	0	0	0	0	0	0	0	0	0	0	0	0	0	0	0	0	0	0	0	0	0	0	0		1970
1971	0	0	0	0	0	0	0	0	0	0	0	0	0	0	0	0	0	0	0	0	0	0	0	0	0	0	0	0	0	0	0	0	0	0	0	0	0	0	0	0	0	0	0	0	0		1971
1972	0	0	0	0	0	0	0	0	0	0	0	0	0	0	0	0	0	0	0	0	0	0	0	0	0	0	0	0	0	0	0	0	0	0	0	0	0	0	0	0	0	0	0	0	0		1972
1973	0	0	0	0	0	0	0	0	0	0	0	0	0	0	0	0	0	0	0	0	0	0	0	0	0	0	0	0	0	0	0	0	0	0	0	0	0	0	0	0	0	0	0	0	0		1973
1974	0	0	0	0	0	0	0	0	0	0	0	0	0	0	0	0	0	0	0	0	0	0	0	0	0	0	0	0	0	0	0	0	0	0	0	0	0	0	0	0	0	0	0	0	0		1974
1975	0	0	0	0	0	0	0	0	0	0	0	0	0	0	0	0	0	0	0	0	0	0	0	0	0	0	0	0	0	0	0	0	0	0	0	0	0	0	0.169037	0	0	0	0	0	0		1975
1976	0	0	0	0	0	0	0.146188	0	0	0	0	0	0	0	0	0	0	0	0	0	0	0	0	0	0	0	0	0	0	0	0	0	0	0	0	0	0	0.137899	0	0	0	0	0	0	0		1976
1977	0	0	0	0	0	0	0	0	0	0	0	0	0	0	0	0	0	0	0	0	0	0	0	0	0	0	0	0	0	0	0	0	0	0	0	0	0	0	0	0	0	0	0	0	0		1977
1978	0	0.203763	0.261985	0	0	0	0	0	0	0	0	0	0	0	0	0	0.158048	0.213005	0.169745	0.184232	0.147998	0.296999	0.369991	0.189416	0.303988	0.307283	0.185524	0.243123	0.239063	0	0	0	0	0	0.329971	0.324562	0	0	0	0	0.244182	0	0	0	0		1978		0.203763
1979	0.256599	0	0	0.202905	0.192298	0	0	0.349256	0.42309	0	0	0	0	0	0	0.408007	0	0	0	0	0	0	0	0	0	0	0	0	0	0	0	0	0	0	0	0	0	0	0	0	0	0	0	0	0		1979	0.256599
1980	0	0	0	0	0	0	0	0	0	0	0	0	0	0	0	0	0	0	0	0	0	0	0	0	0	0	0	0	0	0	0	0	0	0	0	0	0	0	0	0	0	0	0	0	0		1980
1981	0	0	0	0	0	0	0	0	0	0	0	0	0	0	0	0	0	0	0	0	0	0	0	0	0	0	0	0	0	0	0	0	0	0	0	0	0	0	0	0	0	0	0	0	0		1981
1982	0	0	0	0	0	0	0	0	0	0	0	0	0	0	0	0	0	0	0	0	0	0	0	0	0	0	0	0	0	0	0	0	0	0	0	0	0	0	0	0	0	0	0	0	0		1982
1983	0	0	0	0	0	0	0	0	0	0	0	0	0	0	0	0	0	0	0	0	0	0	0	0	0	0	0	0	0	0	0	0	0	0	0	0	0	0	0	0	0	0	0	0	0		1983
1984	0	0	0	0	0	0	0	0	0	0	0	0	0	0	0	0	0	0	0	0	0	0	0	0	0	0	0	0	0	0	0	0	0	0	0	0	0.105192	0	0	0	0	0	0	0	0		1984
1985	0	0	0	0	0	0	0	0	0	0	0	0	0	0	0	0	0	0	0	0	0	0	0	0	0	0	0	0	0	0	0	0	0	0	0	0	0	0	0	0	0	0	0	0	0		1985
1986	0	0	0	0	0	0.154721	0.107921	0	0	0.294838	0.266695	0.289546	0	0.17068	0.456161	0	0	0	0	0	0	0	0	0	0	0	0	0	0	0.269465	0	0	0	0	0	0	0	0	0	0	0	0	0	0	0		1986
1987	0	0	0	0	0	0	0	0	0	0	0	0	0	0	0	0	0	0	0	0	0	0	0	0	0	0	0	0	0	0	0.311137	0.471138	0.536493	0	0	0	0	0	0	0	0	0.324421	0.353532	0.324421	0		1987
1988	0	0	0	0	0	0	0	0	0	0	0	0	0	0	0	0	0	0	0	0	0	0	0	0	0	0	0	0	0	0	0	0	0	0	0	0	0	0	0	0	0	0	0	0	0		1988
1989	0	0	0	0	0	0	0	0	0	0	0	0	0	0	0	0	0	0	0	0	0	0	0	0	0	0	0	0	0	0	0	0	0	0	0	0	0	0	0	0	0	0	0	0	0		1989
1990	0	0	0	0	0	0	0	0	0	0	0	0	0	0	0	0	0	0	0	0	0	0	0	0	0	0	0	0	0	0	0	0	0	0	0	0	0	0	0	0	0	0	0	0	0		1990
1991	0	0	0	0	0	0	0	0	0	0	0	0	0	0	0	0	0	0	0	0	0	0	0	0	0	0	0	0	0	0	0	0	0	0	0	0	0	0	0	0	0	0	0	0	0		1991
1992	0	0	0	0	0	0	0	0	0	0	0	0	0	0	0	0	0	0	0	0	0	0	0	0	0	0	0	0	0	0	0	0	0	0	0	0	0	0	0	0	0	0	0	0	0		1992
1993	0	0	0	0	0	0	0	0	0	0	0	0	0	0	0	0	0	0	0	0	0	0	0	0	0	0	0	0	0	0	0	0	0	0	0	0	0	0	0	0	0	0	0	0	0		1993
1994	0	0	0	0	0	0	0	0	0	0	0	0	0	0	0	0	0	0	0	0	0	0	0	0	0	0	0	0.258864	0	0	0	0	0	0.78616	0	0	0	0	0	0	0	0	0	0	0		1994
1995	0	0	0	0	0	0	0	0	0	0	0	0	0	0	0	0	0.16758	0	0	0	0	0	0	0	0	0	0	0	0	0	0	0	0	0	0	0	0	0.13674	0	0	0	0	0	0	0.182415		1995
1996	0.309634	0.335989	0.302508	0.312832	0.334793	0.213979	0.173584	0.512421	0.516601	0.382492	0.38383	0.334307	0.371326	0.233798	0	0.605577	0	0.19623	0.17337	0.188906	0.15213	0.279115	0	0.270829	0.215697	0.229509	0.22352	0	0.281954	0	0.419437	0.402752	0	0	0.197773	0.215262	0.231535	0	0	0	0.290954	0	0	0	0		1996	0.309634	0.335989
1997	0	0	0	0	0	0	0	0	0	0	0	0	0	0	0.523158	0	0	0	0	0	0	0	0	0	0	0	0	0	0	0.444378	0	0	0	0	0	0	0	0	0	0	0	0.388875	0.464138	0.388875	0		1997
1998	0	0	0	0	0	0	0	0	0	0	0	0	0	0	0	0	0	0	0	0	0	0	0	0	0	0	0	0	0	0	0	0	0	0	0	0	0	0	0	0	0	0	0	0	0		1998
1999	0	0	0	0	0	0	0	0	0	0	0	0	0	0	0	0	0	0	0	0	0	0	0	0	0	0	0	0	0	0	0	0	0	0	0	0	0	0	0	0	0	0	0	0	0		1999
2000	0	0	0	0	0	0	0	0	0	0	0	0	0	0	0	0	0	0	0	0	0	0	0	0	0	0	0	0	0	0	0	0	0	0	0	0	0	0	0	0	0	0	0	0	0		2000
2001	0	0	0	0	0	0	0	0	0	0	0	0	0	0	0	0	0	0	0	0	0	0	0.319932	0	0	0	0	0	0	0	0	0	0.549151	0	0	0	0	0	0	0	0	0	0	0	0		2001
2002	0	0	0	0	0	0	0	0	0	0	0	0	0	0	0	0	0	0	0	0	0	0	0	0	0	0	0	0	0	0	0	0	0	0	0	0	0	0	0	0	0	0	0	0	0		2002
2003	0	0	0	0	0	0	0	0	0	0	0	0	0	0	0	0	0	0	0	0	0	0	0	0	0	0	0	0	0	0	0	0	0	0	0	0	0	0	0	0	0	0	0	0	0		2003
2004	0	0	0	0	0	0	0	0	0	0	0	0	0	0	0	0	0	0	0	0	0	0	0	0	0	0	0	0	0	0	0	0	0	0.688216	0	0	0	0	0	0	0	0	0	0	0		2004
2005	0	0	0	0	0	0	0	0	0	0	0	0	0	0	0	0	0	0	0	0	0	0	0	0	0	0	0	0	0	0	0	0	0	0	0	0	0	0	0	0	0	0	0	0	0		2005
2006	0	0	0	0	0	0	0	0	0	0	0	0	0	0	0	0	0	0	0	0	0	0	0	0	0	0	0	0	0	0	0	0	0	0	0	0	0	0	-0.0993981	0	0	0	0	0	0		2006
2007	0	0	0	0	0	0	0	0	0	0	0	0	0	0	0	0	0	0	0	0	0	0	0	0	0	0	0	0	0	0	0	0	0	0	0	0	0	0	0	0	0	0	0	0	0		2007
2008	0	0	0	0	0	0	0	0	0	0	0	0	0	0	0	0	0	0	0	0	0	0	0	0	0	0	0	0	0	0	0	0	0	0	0	0	0	0	0	0	0	0	0	0	0		2008
2009	0	0	0	0	0	0	0	0	0	0	0	0	0	0	0	0	0	0	0	0	0	0	0	0	0	0	0	0	0	0	0	0	0	0	0	0	0	0	0	0	0	0	0	0	0		2009
2010	0	0	0	0	0	0	0	0	0	0	0	0	0	0	0	0	0	0	0	0	0	0	0	0	0	0	0	0	0	0	0	0	0	0	0	0	0	0	0	0	0	0	0	0	0		2010
2011	0	0	0	0	0	0	0	0	0	0	0	0	0	0	0	0	0	0	0	0	0	0	0	0	0	0	0	0	0	0	0	0	0	0	0	0	0	0	0	0	0	0	0	0	0		2011
2012	0	0	0	0	0	0	0	0	0	0	0	0	0	0	0	0	0	0	0	0	0	0	0	0	0	0	0	0	0	0	0	0	0	0	0	0	0	0	0	0	0	0	0	0	0		2012
2013	0	0	0	0	0	0	0	0	0	0	0	0	0	0	0	0	0	0	0	0	0	0	0	0	0	0	0	0	0	0	0	0	0	0	0	0	0	0	0	0	0	0	0	0	0		2013
2014	0	0	0			0	0	0	0	0	0	0	0	0	0	0	0	0	0	0	0	0	0	0	0	0	0	0	0	0	0	0	0	0	0	0	0	0	0	0	0	0	0	0	0		2014
[truncated: 43 more columns]

## Sheet: Annual chart Fig 2
Date	HadCRU	C&W	BEST	NCDC	GISS	HadCRU	C&W	BEST	NCDC	GISS								adjusted	original	shiftshare
1880	0.10615	0.088	0.05485	0.0599493	0.021	0.08782	0.06936	0.02478	0.0599493	0.021						HadCRU
1881	0.12715	0.133	0.14485	0.110111	0.111	0.10882	0.11436	0.11478	0.110111	0.111							1880	-0.00961018	-0.00129852
1882	0.11915	0.085	0.08785	0.0906223	0.081	0.10082	0.06636	0.05778	0.0906223	0.081							1929	-0.00545648	-0.0237865
1883	0.04115	0.04	0.01885	0.0390033	0.051	0.02282	0.02136	-0.01122	0.0390033	0.051							1930	0.262978	0.244648	0.268434
1884	-0.07185	-0.121	-0.13915	-0.0225157	-0.029	-0.09018	-0.13964	-0.16922	-0.0225157	-0.029							1978	0.269159	0.250829
1885	-0.05385	-0.092	-0.12115	0.0072393	-0.009	-0.07218	-0.11064	-0.15122	0.0072393	-0.009							1979	0.375255	0.356925	0.106096
1886	-0.03785	-0.081	-0.14015	0.0264003	0.001	-0.05618	-0.09964	-0.17022	0.0264003	0.001							1996	0.565711	0.547381
1887	-0.08885	-0.12	-0.16415	-0.0499577	-0.079	-0.10718	-0.13864	-0.19422	-0.0499577	-0.079							1997	0.738811	0.720481	0.173099
1888	0.01715	0.016	0.03285	0.0314853	0.051	-0.00118	-0.00264	0.00278	0.0314853	0.051							2014	0.8516	0.83327																			GISS		HadCRUt4		NCDC		C&W		BEST
1889	0.15315	0.155	0.15685	0.114229	0.141	0.13482	0.13636	0.12678	0.114229	0.141										0.54763																		1880–1901	-0.0324901	1850-1929	-0.022488	1880-1929	-0.0401608	1850-1919	-0.108257	1850-1920	-0.0557843
1890	-0.09085	-0.092	-0.13215	-0.10055	-0.089	-0.10918	-0.11064	-0.16222	-0.10055	-0.089						C&W																						1902	-0.13		0.26		0.26		0.16		0.15
1891	-0.01085	-0.019	-0.02015	-0.0617857	-0.029	-0.02918	-0.03764	-0.05022	-0.0617857	-0.029							1880	0.0137247	0.0167254																			1902–1919	0.0582456
1892	-0.12985	-0.107	-0.06315	-0.0988157	-0.069	-0.14818	-0.12564	-0.09322	-0.0988157	-0.069							1919	-0.0241082	-0.0427482																			1920	0.18
1893	-0.14485	-0.082	-0.03015	-0.139764	-0.119	-0.16318	-0.10064	-0.06022	-0.139764	-0.119							1920	0.103882	0.0852424	0.127991																		1920-1936	0.148235					1920-1936	0.112745	1920-1936	0.100392
1894	-0.07985	-0.051	-0.03615	-0.0985317	-0.089	-0.09818	-0.06964	-0.06622	-0.0985317	-0.089							1936	0.225529	0.206889																			1937	0.18						0.16		0.19
1895	-0.06485	-0.019	0.02185	-0.0437927	-0.009	-0.08318	-0.03764	-0.00822	-0.0437927	-0.009							1937	0.372743	0.354103	0.147214																		1937-1979	0.00951374	1930-1979	0.00618122	1930-1978	0.0721633	1937-1979	-0.0755137	1937-1979	-0.0585222
1896	0.13715	0.145	0.14985	0.100787	0.061	0.11882	0.12636	0.11978	0.100787	0.061							1979	0.27642	0.25778																			1980	0.26		0.2		0.26		0.19		0.2		0.222
1897	0.11715	0.136	0.14585	0.0609693	0.051	0.09882	0.11736	0.11578	0.0609693	0.051							1980	0.429706	0.411066	0.153286																		1980-1996	0.166667	1980-1996	0.190456	1979-1996	0.181681	1980-1996	0.183804	1980-1996	0.160902
1898	-0.08285	-0.084	-0.05915	-0.0741657	-0.079	-0.10118	-0.10264	-0.08922	-0.0741657	-0.079							1996	0.603118	0.584478																			1997	0.31		0.32		0.31		0.33		0.31		0.316
1899	0.03815	0.07	0.09185	0.0490813	0.031	0.01982	0.05136	0.06178	0.0490813	0.031							1997	0.766725	0.748085	0.163608
1900	0.13015	0.179	0.21085	0.0903883	0.091	0.11182	0.16036	0.18078	0.0903883	0.091							2013	0.936922	0.918282																			HadCRU			C&W			BEST			NCDC
1901	0.06315	0.125	0.13585	0.0311053	0.031	0.04482	0.10636	0.10578	0.0311053	0.031										0.592098																		Period	Change	Trend Sig.	Period	Change	Trend Sig.	Period	Change	Trend Sig.	Period	Change	Trend Sig.
1902	-0.08085	-0.035	-0.00515	-0.0590617	-0.069	-0.09918	-0.05364	-0.03522	-0.0590617	-0.069						BEST
1903	-0.14985	-0.106	-0.10715	-0.153067	-0.129	-0.16818	-0.12464	-0.13722	-0.153067	-0.129							1880	0.0128733	0.014015																			1850–1929	-0.00983825	NS	1850–1919	-0.0594736	NS	1850–1920	-0.0483474	NS	1880–1929	-0.0698653	NS
1904	-0.19685	-0.162	-0.14015	-0.212246	-0.199	-0.21518	-0.18064	-0.17022	-0.212246	-0.199							1919	-0.0069716	-0.0417693																			1930	0.260727		1920	0.158894		1921	0.149697		1930	0.256068
1905	-0.05185	0.002	0.00885	-0.0968477	-0.059	-0.07018	-0.01664	-0.02122	-0.0968477	-0.059							1920	0.124174	0.0818192	0.131145
1906	0.03815	0.089	0.09485	-0.0484967	-0.029	0.01982	0.07036	0.06478	-0.0484967	-0.029							1936	0.209276	0.182211																						1920–1936	0.121647	NS	1920–1936	0.0851029	NS
1907	-0.14285	-0.08	-0.08215	-0.190953	-0.189	-0.16118	-0.09864	-0.11222	-0.190953	-0.189							1937	0.387692	0.357622	0.178416																					1937	0.159281		1937	0.19125
1908	-0.19085	-0.109	-0.10615	-0.240622	-0.199	-0.20918	-0.12764	-0.13622	-0.240622	-0.199							1979	0.32917	0.2991																			1930–1979	0.00618122	NS	1937–1979	-0.0963235	*	1937–1979	-0.0585222	NS	1930–1978	0.0873325	NS
1909	-0.20585	-0.16	-0.16315	-0.240905	-0.229	-0.22418	-0.17864	-0.19322	-0.240905	-0.229							1980	0.48034	0.45027	0.15117																		1980	0.204465		1980	0.192298		1980	0.202905		1979	0.261985
1910	-0.16585	-0.143	-0.13615	-0.224901	-0.219	-0.18418	-0.16164	-0.16622	-0.224901	-0.219							1996	0.641242	0.611172																			1980–1996	0.190456	**	1980–1996	0.173412	*	1980–1996	0.160902	*	1979–1996	0.182522	**
1911	-0.22185	-0.164	-0.15815	-0.249119	-0.209	-0.24018	-0.18264	-0.18822	-0.249119	-0.209							1997	0.80634	0.78032	0.165098																		1997	0.317404		1997	0.334793		1997	0.312832		1997	0.302508
1912	-0.11685	-0.092	-0.07615	-0.195562	-0.169	-0.13518	-0.11064	-0.10622	-0.195562	-0.169							2013	0.941713	1.57357																			1997–2014	0.112789	NS	1997–2013	0.170196	*	1997–2013	0.135373	*	1997–2014	0.0984165	NS
1913	-0.10685	-0.061	-0.04215	-0.160934	-0.149	-0.12518	-0.07964	-0.07222	-0.160934	-0.149										0.625829																		Trend	0.299589			0.309458			0.274508			0.298406
1914	0.07515	0.115	0.13085	-0.0002057	0.011	0.05682	0.09636	0.10078	-0.0002057	0.011						NCDC																						Step	0.782595			0.845267			0.856683			0.820561
1915	0.16815	0.191	0.19385	0.0803923	0.071	0.14982	0.17236	0.16378	0.0803923	0.071																												Shift	0.54763			0.592098			0.625829			0.535634
1916	-0.06585	-0.042	-0.05015	-0.119641	-0.119	-0.08418	-0.06064	-0.08022	-0.119641	-0.119							1880	-0.0104597																				Trend/step	0.382814			0.366107			0.320431			0.363661
1917	-0.14585	-0.133	-0.14915	-0.155545	-0.199	-0.16418	-0.15164	-0.17922	-0.155545	-0.199							1929	-0.080325																				Trend/shift	0.547064			0.522646			0.438631			0.557109
1918	-0.01085	-0.006	-0.00315	-0.0481707	-0.069	-0.02918	-0.02464	-0.03322	-0.0481707	-0.069							1930	0.166761		0.247086																		Shiftshare	0.54763			0.592098			0.625829			0.535634
1919	0.04915	0.054	0.07385	-0.0702727	-0.049	0.03082	0.03536	0.04378	-0.0702727	-0.049							1978	0.254094																					0.382814			0.366107			0.320431			0.363661
1920	0.08115	0.094	0.08785	-0.0519577	-0.029	0.06282	0.07536	0.05778	-0.0519577	-0.029							1979	0.380482		0.126388																			0.847219			0.901556			0.900337			0.83404
1921	0.13915	0.155	0.16485	0.0172523	0.031	0.12082	0.13636	0.13478	0.0172523	0.031							1996	0.563004																				Ratio	1.82794			1.91334			2.27982			1.79498
1922	0.02215	0.069	0.06885	-0.0702497	-0.049	0.00382	0.05036	0.03878	-0.0702497	-0.049							1997	0.725164		0.16216																		Internal shift
1923	0.05615	0.093	0.08785	-0.0488047	-0.019	0.03782	0.07436	0.05778	-0.0488047	-0.019							2014	0.82358
1924	0.03115	0.099	0.10485	-0.0451337	0.001	0.01282	0.08036	0.07478	-0.0451337	0.001										0.535634
1925	0.11215	0.132	0.14485	0.0253033	0.021	0.09382	0.11336	0.11478	0.0253033	0.021						GISS
1926	0.21915	0.274	0.28785	0.121602	0.141	0.20082	0.25536	0.25778	0.121602	0.141							1880	0.0217905
1927	0.11815	0.168	0.17385	0.0571053	0.051	0.09982	0.14936	0.14378	0.0571053	0.051							1901	-0.0106996
1928	0.11815	0.195	0.18785	0.0549833	0.081	0.09982	0.17636	0.15778	0.0549833	0.081							1902	-0.151456		-0.140757
1929	-0.02185	0.016	0.01085	-0.0650567	-0.069	-0.04018	-0.00264	-0.01922	-0.0650567	-0.069							1919	-0.0932105
1930	0.19015	0.231	0.23685	0.124362	0.121	0.17182	0.21236	0.20678	0.124362	0.121							1920	-0.0184118		0.0747988
1931	0.24215	0.291	0.28785	0.145938	0.171	0.22382	0.27236	0.25778	0.145938	0.171							1936	0.129824
1932	0.19415	0.249	0.24785	0.125697	0.131	0.17582	0.23036	0.21778	0.125697	0.131							1937	0.231359		0.101536
1933	0.05715	0.083	0.06385	-0.0124247	-0.009	0.03882	0.06436	0.03378	-0.0124247	-0.009							1979	0.240873
1934	0.20115	0.227	0.20585	0.130298	0.141	0.18282	0.20836	0.17578	0.130298	0.141							1980	0.409431		0.168558
1935	0.15515	0.19	0.17085	0.0995973	0.091	0.13682	0.17136	0.14078	0.0995973	0.091							1996	0.576098
1936	0.18615	0.234	0.22285	0.126222	0.141	0.16782	0.21536	0.19278	0.126222	0.141							1997	0.730825		0.154727
1937	0.30315	0.377	0.38385	0.237317	0.271	0.28482	0.35836	0.35378	0.237317	0.271							2014	0.874509
1938	0.32515	0.374	0.38485	0.267584	0.291	0.30682	0.35536	0.35478	0.267584	0.291										0.358863
1939	0.27515	0.349	0.35485	0.255494	0.251	0.25682	0.33036	0.32478	0.255494	0.251
1940	0.34815	0.434	0.45285	0.292833	0.311	0.32982	0.41536	0.42278	0.292833	0.311
1941	0.34815	0.421	0.42785	0.345959	0.321	0.32982	0.40236	0.39778	0.345959	0.321									1997 shiftshare mean	0.163738
1942	0.30615	0.37	0.38785	0.30131	0.291	0.28782	0.35136	0.35778	0.30131	0.291										0.00658029
1943	0.32915	0.407	0.42285	0.295511	0.301	0.31082	0.38836	0.39278	0.295511	0.301
1944	0.47815	0.51	0.52585	0.403574	0.381	0.45982	0.49136	0.49578	0.403574	0.381
1945	0.36415	0.382	0.38785	0.279527	0.241	0.34582	0.36336	0.35778	0.279527	0.241
1946	0.26215	0.296	0.32085	0.147221	0.161	0.24382	0.27736	0.29078	0.147221	0.161
1947	0.28915	0.364	0.40785	0.138158	0.201	0.27082	0.34536	0.37778	0.138158	0.201
1948	0.29415	0.291	0.30785	0.130585	0.141	0.27582	0.27236	0.27778	0.130585	0.141
1949	0.25615	0.24	0.27385	0.12125	0.131	0.23782	0.22136	0.24378	0.12125	0.131
1950	0.15615	0.155	0.19585	0.0331563	0.051	0.13782	0.13636	0.16578	0.0331563	0.051
1951	0.28215	0.334	0.37185	0.187463	0.181	0.26382	0.31536	0.34178	0.187463	0.181
1952	0.36215	0.408	0.43485	0.229438	0.261	0.34382	0.38936	0.40478	0.229438	0.261
1953	0.43115	0.471	0.50085	0.307555	0.331	0.41282	0.45236	0.47078	0.307555	0.331
1954	0.20115	0.269	0.30185	0.0942033	0.131	0.18282	0.25036	0.27178	0.0942033	0.131
1955	0.14515	0.203	0.24985	0.0764663	0.121	0.12682	0.18436	0.21978	0.0764663	0.121
1956	0.06715	0.144	0.17985	0.0178603	0.061	0.04882	0.12536	0.14978	0.0178603	0.061
1957	0.32815	0.373	0.42885	0.258965	0.271	0.30982	0.35436	0.39878	0.258965	0.271
1958	0.38015	0.394	0.42885	0.311538	0.291	0.36182	0.37536	0.39878	0.311538	0.291
1959	0.34815	0.362	0.40285	0.27021	0.271	0.32982	0.34336	0.37278	0.27021	0.271
1960	0.28315	0.312	0.35685	0.218244	0.201	0.26482	0.29336	0.32678	0.218244	0.201
1961	0.37015	0.387	0.43385	0.298435	0.301	0.35182	0.36836	0.40378	0.298435	0.301
1962	0.34815	0.364	0.39085	0.323122	0.281	0.32982	0.34536	0.36078	0.323122	0.281
1963	0.38115	0.397	0.43185	0.34101	0.321	0.36282	0.37836	0.40178	0.34101	0.321
1964	0.10915	0.12	0.15785	0.0816123	0.041	0.09082	0.10136	0.12778	0.0816123	0.041
1965	0.19015	0.221	0.25685	0.142048	0.141	0.17182	0.20236	0.22678	0.142048	0.141
1966	0.25915	0.287	0.32485	0.202291	0.201	0.24082	0.26836	0.29478	0.202291	0.201
1967	0.25515	0.322	0.36385	0.216851	0.231	0.23682	0.30336	0.33378	0.216851	0.231
1968	0.21915	0.265	0.30685	0.202975	0.191	0.20082	0.24636	0.27678	0.202975	0.191
1969	0.36115	0.406	0.44485	0.30863	0.301	0.34282	0.38736	0.41478	0.30863	0.301
1970	0.30315	0.346	0.37485	0.265519	0.281	0.28482	0.32736	0.34478	0.265519	0.281
1971	0.14715	0.209	0.25785	0.163792	0.171	0.12882	0.19036	0.22778	0.163792	0.171
1972	0.26315	0.289	0.35085	0.258143	0.261	0.24482	0.27036	0.32078	0.258143	0.261
1973	0.39515	0.422	0.45085	0.388613	0.401	0.37682	0.40336	0.42078	0.388613	0.401
1974	0.12015	0.186	0.23285	0.146057	0.171	0.10182	0.16736	0.20278	0.146057	0.171
1975	0.18615	0.241	0.28685	0.215824	0.231	0.16782	0.22236	0.25678	0.215824	0.231
1976	0.09315	0.131	0.18085	0.125317	0.121	0.07482	0.11236	0.15078	0.125317	0.121
1977	0.37715	0.421	0.47785	0.373335	0.391	0.35882	0.40236	0.44778	0.373335	0.391
1978	0.26915	0.309	0.35485	0.296261	0.291	0.25082	0.29036	0.32478	0.296261	0.291
1979	0.38815	0.394	0.44185	0.387151	0.361	0.36982	0.37536	0.41178	0.387151	0.361
1980	0.42415	0.505	0.56085	0.425977	0.471	0.40582	0.48636	0.53078	0.425977	0.471
1981	0.47115	0.552	0.60785	0.462037	0.521	0.45282	0.53336	0.57778	0.462037	0.521
1982	0.34215	0.356	0.38985	0.353315	0.331	0.32382	0.33736	0.35978	0.353315	0.331
1983	0.52115	0.539	0.57985	0.517675	0.511	0.50282	0.52036	0.54978	0.517675	0.511
1984	0.31615	0.369	0.41485	0.325479	0.361	0.29782	0.35036	0.38478	0.325479	0.361
1985	0.30215	0.356	0.40085	0.305097	0.321	0.28382	0.33736	0.37078	0.305097	0.321
1986	0.37715	0.4	0.44985	0.396358	0.381	0.35882	0.38136	0.41978	0.396358	0.381
1987	0.51815	0.529	0.58885	0.532648	0.521	0.49982	0.51036	0.55878	0.532648	0.521
1988	0.53115	0.586	0.63685	0.540621	0.591	0.51282	0.56736	0.60678	0.540621	0.591
1989	0.45115	0.474	0.51385	0.467183	0.481	0.43282	0.45536	0.48378	0.467183	0.481
1990	0.62515	0.659	0.70385	0.602254	0.631	0.60682	0.64036	0.67378	0.602254	0.631
1991	0.58615	0.651	0.68685	0.575694	0.621	0.56782	0.63236	0.65678	0.575694	0.621
1992	0.43515	0.455	0.50385	0.439031	0.431	0.41682	0.43636	0.47378	0.439031	0.431
1993	0.47615	0.497	0.53885	0.468221	0.451	0.45782	0.47836	0.50878	0.468221	0.451
1994	0.53715	0.567	0.58785	0.527771	0.521	0.51882	0.54836	0.55778	0.527771	0.521
1995	0.65415	0.694	0.73485	0.647982	0.671	0.63582	0.67536	0.70478	0.647982	0.671
1996	0.51215	0.59	0.63385	0.516872	0.561	0.49382	0.57136	0.60378	0.516872	0.561
1997	0.72115	0.743	0.77485	0.71655	0.691	0.70282	0.72436	0.74478	0.71655	0.691
1998	0.86615	0.895	0.92585	0.833949	0.851	0.84782	0.87636	0.89578	0.833949	0.851
1999	0.63815	0.652	0.69085	0.656246	0.641	0.61982	0.63336	0.66078	0.656246	0.641
2000	0.62515	0.664	0.71085	0.623509	0.641	0.60682	0.64536	0.68078	0.623509	0.641
2001	0.77015	0.818	0.84785	0.745673	0.771	0.75182	0.79936	0.81778	0.745673	0.771
2002	0.82615	0.886	0.92485	0.804083	0.851	0.80782	0.86736	0.89478	0.804083	0.851
2003	0.83815	0.887	0.90985	0.81509	0.841	0.81982	0.86836	0.87978	0.81509	0.841
2004	0.77915	0.805	0.81385	0.773641	0.751	0.76082	0.78636	0.78378	0.773641	0.751
2005	0.87415	0.952	0.99185	0.843647	0.901	0.85582	0.93336	0.96178	0.843647	0.901
2006	0.83615	0.903	0.93685	0.789731	0.831	0.81782	0.88436	0.90678	0.789731	0.831
2007	0.82415	0.93	0.94485	0.783351	0.861	0.80582	0.91136	0.91478	0.783351	0.861
2008	0.72515	0.793	0.80485	0.708858	0.731	0.70682	0.77436	0.77478	0.708858	0.731
2009	0.83515	0.923	0.91785	0.789963	0.831	0.81682	0.90436	0.88778	0.789963	0.831
2010	0.88615	0.996	0.98785	0.84683	0.901	0.86782	0.97736	0.95778	0.84683	0.901
2011	0.75215	0.858	0.86485	0.727014	0.791	0.73382	0.83936	0.83478	0.727014	0.791
2012	0.79815	0.88	0.89585	0.772964	0.811	0.77982	0.86136	0.86578	0.772964	0.811
2013	0.82315	0.896	0.91485	0.820103	0.841	0.80482	0.87736	0.88478	0.820103	0.841
2014	0.89515			0.887486	0.911	0.87682			0.887486	0.911
	4.16334e-18	-8.32667e-18	0	-7.21645e-17	1.94289e-17	-0.01833	-0.01864	-0.03007	-7.21645e-17	1.94289e-17
	0.83095	0.9075	0.91585	0.81088	0.851
											0.863236	0.0465318
[truncated: 5 more columns]

## Sheet: Sat-surf Chart Fig 3
Date	RSS	UAH	HadCRU	GISS
1979-01-01	-0.1725	-0.198394	-0.266985	-0.25475	RSS TLT regressions
1979-04-01	-0.206	-0.181634	-0.196133	-0.19475	1	28856	0.00244034
1979-07-01	-0.131333	-0.17719	-0.108476	-0.22475	1	31686	-0.202742
1979-10-01	0.0546667	-0.0264491	-0.0371056	-0.06475	2	31778	0.00506765
1980-01-01	0.052	0.0649398	0.0570148	0.06525	2	35612	0.0254905
1980-04-01	0.0303333	0.115032	-0.0581333	0.00525	3	35704	0.277221	0.25173
1980-07-01	0.048	0.0728102	-0.115143	-0.07475	3	41913	0.211514
1980-10-01	-0.023	-0.0297824	-0.101772	-0.09475	UAH TLT
1981-01-01	0.106	-0.00506019	0.0163481	0.07525		28856	-0.0255442
1981-04-01	0.019	-0.0449676	-0.0404667	0.03525		31686	-0.192331
1981-07-01	-0.0306667	-0.0538565	-0.0574759	0.00525		31778	0.0367634
1981-10-01	-0.0626667	-0.0897824	-0.112439	-0.14475		35612	0.0120482
1982-01-01	-0.0516667	-0.0650602	-0.106652	-0.09475		35704	0.248519	0.236471
1982-04-01	-0.169667	-0.228301	-0.1968	-0.24475		41913	0.193158
1982-07-01	-0.237	-0.26719	-0.199809	-0.21475	HadCRU
1982-10-01	-0.185667	-0.246449	-0.134439	-0.18475		28856	-0.0816496
1983-01-01	0.0586667	-0.00506019	0.149348	0.13525		31868	-0.135863
1983-04-01	0.178333	0.195032	-0.0288	0.05525		31959	0.0228012
1983-07-01	0.0546667	0.00947685	-0.0144759	-0.08475		35521	0.0502822
1983-10-01	0.0253333	0.0135509	0.0185611	-0.02475		35612	0.24965	0.199368
1984-01-01	-0.207	-0.198394	-0.103985	-0.10475		41913	0.342965
1984-04-01	-0.157	-0.0783009	-0.1468	-0.07475	GISS
1984-07-01	-0.189667	-0.170523	-0.175476	-0.17475		28856	-0.0779769
1984-10-01	-0.292	-0.183116	-0.201106	-0.18475		31868	-0.127994
1985-01-01	-0.299	-0.238394	-0.312319	-0.26475		31959	0.0313127
1985-04-01	-0.308333	-0.274968	-0.196467	-0.16475		35612	0.0572361
1985-07-01	-0.296333	-0.310523	-0.201809	-0.20475		35704	0.241146	0.18391
1985-10-01	-0.211333	-0.283116	-0.191106	-0.19475		41913	0.3566
1986-01-01	-0.140667	-0.158394	-0.101652	-0.04475
1986-04-01	-0.103667	-0.0983009	-0.108133	-0.04475
1986-07-01	-0.179333	-0.163856	-0.154143	-0.18475
1986-10-01	-0.177333	-0.179782	-0.136439	-0.23475
1987-01-01	0.0856667	0.121606	-0.0423185	-0.00475
1987-04-01	-0.00433333	0.0216991	-0.0921333	-0.09475
1987-07-01	0.0716667	0.119477	0.0341907	0.04525
1987-10-01	0.118	0.106884	0.0588944	-0.00475
1988-01-01	0.18	0.258273	0.132348	0.16525
1988-04-01	0.130667	0.181699	0.0598667	0.13525
1988-07-01	0.101333	0.16281	0.0185241	0.08525
1988-10-01	0.024	0.0802176	-0.0394389	-0.01475
1989-01-01	-0.216667	-0.191727	-0.0706519	-0.03475
1989-04-01	-0.180333	-0.184968	-0.0764667	-0.03475
1989-07-01	-0.106667	-0.14719	-0.0334759	-0.03475
1989-10-01	-0.0263333	-0.0364491	-0.0411056	-0.02475
1990-01-01	-0.0716667	-0.0183935	0.0636815	0.07525
1990-04-01	0.112	0.115032	0.224533	0.26525
1990-07-01	0.0463333	0.0861435	0.0788574	0.05525
1990-10-01	0.142667	0.126884	0.109894	0.06525
1991-01-01	0.127333	0.188273	0.0973481	0.13525
1991-04-01	0.170667	0.205032	0.118533	0.09525
1991-07-01	0.201667	0.266144	0.120857	0.16525
1991-10-01	-0.048	-0.0997824	0.0348944	0.04525
1992-01-01	-0.106667	-0.131727	0.0940148	0.09525
1992-04-01	-0.112667	-0.124968	0.0118667	0.03525
1992-07-01	-0.288	-0.280523	-0.130809	-0.15475
1992-10-01	-0.204333	-0.236449	-0.230772	-0.26475
1993-01-01	-0.194333	-0.218394	0.0366815	0.02525
1993-04-01	-0.195	-0.234968	0.0102	-0.01475
1993-07-01	-0.058	-0.0405231	-0.0404759	-0.09475
1993-10-01	-0.131	-0.109782	-0.124439	-0.17475
1994-01-01	0.0186667	0.0149398	-0.0986519	-0.13475
1994-04-01	-0.039	-0.0583009	0.0552	0.01525
1994-07-01	0.0713333	0.0794769	0.0371907	0.00525
1994-10-01	0.059	0.0268843	0.106894	0.10525
1995-01-01	0.144333	0.138273	0.241015	0.25525
1995-04-01	0.138667	0.131699	0.100867	0.10525
1995-07-01	0.164333	0.22281	0.157524	0.17525
1995-10-01	0.245667	0.206884	0.139894	0.11525
1996-01-01	0.005	-0.00506019	0.00968148	0.05525
1996-04-01	0.00833333	0.0416991	0.0022	0.03525
1996-07-01	0.0463333	0.0761435	0.0245241	0.08525
1996-10-01	0.120333	0.150218	-0.0361056	0.00525
1997-01-01	-0.008	-0.00172685	0.0746815	0.07525
1997-04-01	-0.014	-0.0716343	0.1292	0.13525
1997-07-01	0.128	0.11281	0.229857	0.14525
1997-10-01	0.189333	0.156884	0.348894	0.31525
1998-01-01	0.529333	0.56494	0.405681	0.40525
1998-04-01	0.703	0.711699	0.4132	0.36525
1998-07-01	0.581333	0.60281	0.448524	0.42525
1998-10-01	0.383333	0.400218	0.202894	0.17525
1999-01-01	0.270333	0.241606	0.291348	0.29525
1999-04-01	0.0943333	0.0550324	0.0918667	0.04525
1999-07-01	0.018	-0.000523148	0.0888574	0.10525
1999-10-01	0.097	0.0768843	0.101228	0.12525
2000-01-01	0.0626667	-0.0417269	0.177681	0.14525
2000-04-01	0.195	0.135032	0.2042	0.24525
2000-07-01	0.065	0.0594769	0.124191	0.14525
2000-10-01	0.087	0.106884	0.0698944	0.06525
2001-01-01	0.08	0.0949398	0.104681	0.11525
2001-04-01	0.281333	0.241699	0.283533	0.27525
2001-07-01	0.245333	0.21281	0.291524	0.26525
2001-10-01	0.288333	0.203551	0.319894	0.28525
2002-01-01	0.366	0.298273	0.398348	0.39525
2002-04-01	0.345333	0.328366	0.3522	0.41525
2002-07-01	0.355	0.33281	0.294524	0.28525
2002-10-01	0.220667	0.240218	0.264894	0.31525
2003-01-01	0.318667	0.308273	0.278681	0.29525
2003-04-01	0.285667	0.255032	0.280533	0.28525
2003-07-01	0.228	0.156144	0.320857	0.27525
2003-10-01	0.365	0.283551	0.374228	0.35525
2004-01-01	0.355667	0.34494	0.388681	0.37525
2004-04-01	0.279333	0.275032	0.262533	0.26525
2004-07-01	0.0516667	-0.0105231	0.188524	0.07525
2004-10-01	0.222667	0.163551	0.340228	0.33525
2005-01-01	0.292333	0.241606	0.255681	0.30525
2005-04-01	0.354333	0.305032	0.384533	0.37525
2005-07-01	0.290667	0.26281	0.372857	0.35525
2005-10-01	0.366667	0.326884	0.438561	0.46525
2006-01-01	0.211	0.208273	0.292681	0.33525
2006-04-01	0.186667	0.138366	0.248533	0.22525
2006-07-01	0.208667	0.199477	0.340191	0.31525
2006-10-01	0.273333	0.240218	0.372561	0.37525
2007-01-01	0.386667	0.338273	0.519681	0.50525
2007-04-01	0.270667	0.278366	0.340533	0.40525
2007-07-01	0.247333	0.276144	0.260857	0.29525
2007-10-01	0.183333	0.183551	0.277894	0.30525
2008-01-01	-0.0463333	-0.0583935	0.0746815	0.06525
2008-04-01	-0.0286667	-0.0783009	0.229867	0.27525
2008-07-01	0.0326667	-0.0271898	0.240191	0.18525
2008-10-01	0.184	0.116884	0.329561	0.33525
2009-01-01	0.19	0.16494	0.256681	0.24525
2009-04-01	0.119667	0.0916991	0.275867	0.27525
2009-07-01	0.191	0.156144	0.386857	0.35525
2009-10-01	0.357333	0.330218	0.380228	0.37525
2010-01-01	0.433667	0.448273	0.354681	0.39525
2010-04-01	0.537333	0.525032	0.471533	0.52525
2010-07-01	0.531333	0.449477	0.407857	0.31525
2010-10-01	0.367	0.336884	0.345561	0.37525
2011-01-01	0.110667	0.0816065	0.147681	0.17525
2011-04-01	0.0596667	0.0350324	0.253867	0.28525
2011-07-01	0.297	0.296144	0.319524	0.37525
2011-10-01	0.128	0.120218	0.255561	0.27525
2012-01-01	-0.03	-0.0550602	0.153681	0.16525
2012-04-01	0.205667	0.145032	0.325533	0.34525
2012-07-01	0.279333	0.196144	0.357191	0.27525
2012-10-01	0.286667	0.290218	0.389228	0.42525
2013-01-01	0.240667	0.321606	0.216681	0.26525
2013-04-01	0.183667	0.141699	0.270867	0.26525
2013-07-01	0.224667	0.206144	0.336191	0.30525
2013-10-01	0.195667	0.213551	0.386561	0.41525
2014-01-01	0.191333	0.22494	0.260681	0.30525
2014-04-01	0.248667	0.231699	0.424867	0.46525
2014-07-01	0.295333	0.276144	0.437524	0.34525
2014-10-01	0.239333	0.260218	0.405561	0.47525

## Sheet: HadCRUT.4.3.0.0.annual
Seq	Source	BreakSet	DatasetNo	SetNo	SetNoInData	Type	Model	Treat	%BreakSet	Year	Predecessor	Successor	%SegmentFound	Ti	Shift	%YearOverall	ModalYear	ModalValue	SecondModalYear	SecondModalValue	SegmentTrend	PreTrend	PostTrend"	ShiftFromTrends	30YearTrend	30YrTi	30YearShift	30Yr Mode	30YrModevalue	30YrMode2	30YrMode2Value	Stability
1	HadCRUT.4.3.0.0.annual_20150525_30S_30N.final.csv	[1850.0, 1925, 1978, 1996, 2015.0]	1	1	1	Observed	HadCRUT.4.3	30S_30N	100	1925	1850	1978	100	45.4971	0.221204	100	1925	1	0	0	0.00235311	-0.000556992	-0.000308257	0.250223	0.0152338	7.73481	0.163243	1925	0.95	1924	0.04	0.71
2	HadCRUT.4.3.0.0.annual_20150525_30S_30N.final.csv	[1850.0, 1925, 1978, 1996, 2015.0]	1	1	1	Observed	HadCRUT.4.3	30S_30N	100	1978	1925	1996	100	20.7814	0.189416	100	1978	0.96	1979	0.02	0.00303239	-0.000308257	0.0085872	0.115301	0.0179338	6.76273	0.2215	1976	0.88	1978	0.07	0.51
3	HadCRUT.4.3.0.0.annual_20150525_30S_30N.final.csv	[1850.0, 1925, 1978, 1996, 2015.0]	1	1	1	Observed	HadCRUT.4.3	30S_30N	100	1996	1978	2015	100	21.1766	0.270829	100	1996	0.97	1994	0.02	0.0126437	0.0085872	0.00525088	0.144544	0.0244176	7.12058	0.216654	1996	0.83	1994	0.07	0.75
Seq	Source	BreakSet	DatasetNo	SetNo	SetNoInData	Type	Model	Treat	%BreakSet	Year	Predecessor	Successor	%SegmentFound	Ti	Shift	%YearOverall	ModalYear	ModalValue	SecondModalYear	SecondModalValue	SegmentTrend	PreTrend	PostTrend"	ShiftFromTrends	30YearTrend	30YrTi	30YearShift	30Yr Mode	30YrModevalue	30YrMode2	30YrMode2Value	Stability
4	HadCRUT.4.3.0.0.annual_20150525_nh.final.csv	[1850.0, 1924, 1986, 1996, 2015.0]	2	2	1	Observed	HadCRUT.4.3	nh	100	1924	1850	1986	100	68.8054	0.272401	100	1924	0.98	1929	0.02	0.00277092	-0.00131522	0.000330186	0.310689	0.0242971	8.425	0.255856	1920	0.69	1919	0.21	0.85
5	HadCRUT.4.3.0.0.annual_20150525_nh.final.csv	[1850.0, 1924, 1986, 1996, 2015.0]	2	2	1	Observed	HadCRUT.4.3	nh	100	1986	1924	1996	100	26.3202	0.266695	100	1986	1	0	0	0.00288901	0.000330186	0.00809091	0.211942	0.0150721	6.30697	0.187504	1986	0.83	1987	0.15	0.71
6	HadCRUT.4.3.0.0.annual_20150525_nh.final.csv	[1850.0, 1924, 1986, 1996, 2015.0]	2	2	1	Observed	HadCRUT.4.3	nh	100	1996	1986	2015	100	19.0044	0.38383	100	1996	0.72	1997	0.17	0.0227044	0.00809091	0.015786	0.189147	0.0299088	9.22288	0.287185	1996	0.87	1997	0.08	0.83
Seq	Source	BreakSet	DatasetNo	SetNo	SetNoInData	Type	Model	Treat	%BreakSet	Year	Predecessor	Successor	%SegmentFound	Ti	Shift	%YearOverall	ModalYear	ModalValue	SecondModalYear	SecondModalValue	SegmentTrend	PreTrend	PostTrend"	ShiftFromTrends	30YearTrend	30YrTi	30YearShift	30Yr Mode	30YrModevalue	30YrMode2	30YrMode2Value	Stability
7	HadCRUT.4.3.0.0.annual_20150525_sh.final.csv	[1850.0, 1936, 1978, 1996, 2015.0]	3	3	1	Observed	HadCRUT.4.3	sh	100	1936	1850	1978	100	72.8968	0.270008	100	1936	0.97	1935	0.03	0.00289316	0.000436921	0.00014626	0.247719	0.0238632	10.1287	0.208547	1936	0.77	1939	0.18	0.87
8	HadCRUT.4.3.0.0.annual_20150525_sh.final.csv	[1850.0, 1936, 1978, 1996, 2015.0]	3	3	1	Observed	HadCRUT.4.3	sh	100	1978	1936	1996	100	31.1309	0.213005	100	1978	0.99	1976	0.01	0.00468311	0.00014626	0.00571517	0.155938	0.0136824	6.17999	0.152622	1978	0.7	1976	0.28	0.84
9	HadCRUT.4.3.0.0.annual_20150525_sh.final.csv	[1850.0, 1936, 1978, 1996, 2015.0]	3	3	1	Observed	HadCRUT.4.3	sh	100	1996	1978	2015	100	25.0642	0.19623	100	1996	0.99	1995	0.01	0.00890754	0.00571517	0.00220175	0.125591	0.0162029	8.84943	0.160681	1996	0.99	1994	0.01	0.99
Seq	Source	BreakSet	DatasetNo	SetNo	SetNoInData	Type	Model	Treat	%BreakSet	Year	Predecessor	Successor	%SegmentFound	Ti	Shift	%YearOverall	ModalYear	ModalValue	SecondModalYear	SecondModalValue	SegmentTrend	PreTrend	PostTrend"	ShiftFromTrends	30YearTrend	30YrTi	30YearShift	30Yr Mode	30YrModevalue	30YrMode2	30YrMode2Value	Stability
10	HadCRUT.4.3.0.0.annual_ns_20150525_avg.final.csv	[1850.0, 1929, 1978, 1996, 2015.0]	4	4	1	Observed	HadCRUT.4.3	ns_avg	100	1929	1850	1978	100	73.443	0.260131	100	1929	1	0	0	0.00279108	-0.000284658	0.000128776	0.268305	0.0116176	5.94434	0.111627	1929	0.9	1924	0.04	0.42
11	HadCRUT.4.3.0.0.annual_ns_20150525_avg.final.csv	[1850.0, 1929, 1978, 1996, 2015.0]	4	4	1	Observed	HadCRUT.4.3	ns_avg	100	1978	1929	1996	100	30.5101	0.203763	100	1978	0.86	1986	0.07	0.00386451	0.000128776	0.0112033	0.094893	0.0146162	7.48679	0.177738	1976	0.9	1978	0.09	0.6
12	HadCRUT.4.3.0.0.annual_ns_20150525_avg.final.csv	[1850.0, 1929, 1978, 1996, 2015.0]	4	4	1	Observed	HadCRUT.4.3	ns_avg	100	1996	1978	2015	100	27.4944	0.335989	100	1996	1	0	0	0.0161136	0.0112033	0.00897018	0.150895	0.0231426	9.92924	0.224496	1996	0.95	2000	0.02	0.97

## Sheet: TS-HadCRUT.4.3.0.0
years	30S_30N	30S_30N_Ti	30S_30N_shift	30S_30N_freq	nh	nh_Ti	nh_shift	nh_freq	sh	sh_Ti	sh_shift	sh_freq	ns_avg	ns_avg_Ti	ns_avg_shift	ns_avg_freq
1850	-0.313	0	0	0	-0.331	0	0	0	-0.413	0	0	0	-0.376	0	0	0
1851	-0.229	0	0	0	-0.168	0	0	0	-0.274	0	0	0	-0.222	0	0	0
1852	-0.135	0	0	0	-0.102	0	0	0	-0.348	0	0	0	-0.225	0	0	0
1853	-0.141	0	0	0	-0.177	0	0	0	-0.364	0	0	0	-0.27	0	0	0
1854	-0.196	0	0	0	-0.074	0	0	0	-0.42	0	0	0	-0.247	0	0	0
1855	-0.243	0	0	0	-0.187	0	0	0	-0.349	0	0	0	-0.27	0	0	0
1856	-0.299	0	0	0	-0.378	0	0	0	-0.336	0	0	0	-0.36	0	0	0
1857	-0.524	0	0	0	-0.406	0	0	0	-0.511	0	0	0	-0.457	0	0	0
1858	-0.477	0	0	0	-0.398	0	0	0	-0.525	0	0	0	-0.463	0	0	0
1859	-0.359	0	0	0	-0.216	0	0	0	-0.358	0	0	0	-0.284	0	0	0
1860	-0.292	0	0	0	-0.357	0	0	0	-0.33	0	0	0	-0.341	0	0	0
1861	-0.435	0	0	0	-0.288	0	0	0	-0.505	0	0	0	-0.398	0	0	0
1862	-0.38	0	0	0	-0.647	0	0	0	-0.374	0	0	0	-0.508	0	0	0
1863	-0.393	0	0	0	-0.203	0	0	0	-0.358	0	0	0	-0.28	0	0	0
1864	-0.498	0	0	0	-0.503	0	0	0	-0.461	0	0	0	-0.48	0	0	0
1865	-0.198	0	0	0	-0.24	0	0	0	-0.304	0	0	0	-0.269	0	0	0
1866	-0.251	0	0	0	-0.191	0	0	0	-0.285	0	0	0	-0.24	0	0	0
1867	-0.142	0	0	0	-0.32	0	0	0	-0.281	0	0	0	-0.304	0	0	0
1868	-0.143	0	0	0	-0.104	0	0	0	-0.337	0	0	0	-0.22	0	0	0
1869	-0.152	0	0	0	-0.122	0	0	0	-0.387	0	0	0	-0.256	0	0	0
1870	-0.23	0	0	0	-0.192	0	0	0	-0.344	0	0	0	-0.271	0	0	0
1871	-0.169	0	0	0	-0.381	0	0	0	-0.263	0	0	0	-0.324	0	0	0
1872	-0.319	0	0	0	-0.192	0	0	0	-0.263	0	0	0	-0.228	0	0	0
1873	-0.305	0	0	0	-0.296	0	0	0	-0.307	0	0	0	-0.302	0	0	0
1874	-0.478	0	0	0	-0.282	0	0	0	-0.461	0	0	0	-0.371	0	0	0
1875	-0.251	0	0	0	-0.532	0	0	0	-0.287	0	0	0	-0.408	0	0	0
1876	-0.336	0	0	0	-0.342	0	0	0	-0.417	0	0	0	-0.38	0	0	0
1877	0.102	0	0	0	0.015	0	0	0	-0.153	0	0	0	-0.07	0	0	0
1878	0.208	0	0	0	0.189	0	0	0	-0.114	0	0	0	0.035	0	0	0
1879	-0.216	0	0	0	-0.224	0	0	0	-0.234	0	0	0	-0.229	0	0	0
1880	-0.216	0	0	0	-0.233	0	0	0	-0.212	0	0	0	-0.225	0	0	0
1881	-0.052	0	0	0	-0.244	0	0	0	-0.16	0	0	0	-0.204	0	0	0
1882	-0.235	0	0	0	-0.236	0	0	0	-0.187	0	0	0	-0.212	0	0	0
1883	-0.299	0	0	0	-0.353	0	0	0	-0.227	0	0	0	-0.29	0	0	0
1884	-0.363	0	0	0	-0.462	0	0	0	-0.345	0	0	0	-0.403	0	0	0
1885	-0.282	0	0	0	-0.362	0	0	0	-0.406	0	0	0	-0.385	0	0	0
1886	-0.338	0	0	0	-0.337	0	0	0	-0.402	0	0	0	-0.369	0	0	0
1887	-0.445	0	0	0	-0.354	0	0	0	-0.485	0	0	0	-0.42	0	0	0
1888	-0.08	0	0	0	-0.272	0	0	0	-0.353	0	0	0	-0.314	0	0	0
1889	-0.061	0	0	0	-0.142	0	0	0	-0.212	0	0	0	-0.178	0	0	0
1890	-0.525	0	0	0	-0.367	0	0	0	-0.479	0	0	0	-0.422	0	0	0
1891	-0.255	0	0	0	-0.302	0	0	0	-0.387	0	0	0	-0.342	0	0	0
1892	-0.463	0	0	0	-0.473	0	0	0	-0.454	0	0	0	-0.461	0	0	0
1893	-0.502	0	0	0	-0.545	0	0	0	-0.41	0	0	0	-0.476	0	0	0
1894	-0.496	0	0	0	-0.381	0	0	0	-0.444	0	0	0	-0.411	0	0	0
1895	-0.271	0	0	0	-0.38	0	0	0	-0.414	0	0	0	-0.396	0	0	0
1896	-0.029	0	0	0	-0.163	0	0	0	-0.223	0	0	0	-0.194	0	0	0
1897	-0.003	0	0	0	-0.155	0	0	0	-0.272	0	0	0	-0.214	0	0	0
1898	-0.351	0	0	0	-0.295	0	0	0	-0.535	0	0	0	-0.414	0	0	0
1899	-0.208	0	0	0	-0.227	0	0	0	-0.359	0	0	0	-0.293	0	0	0
1900	0.019	0	0	0	-0.09	0	0	0	-0.316	0	0	0	-0.201	0	0	0
1901	-0.13	0	0	0	-0.139	0	0	0	-0.398	0	0	0	-0.268	0	0	0
1902	-0.178	0	0	0	-0.387	0	0	0	-0.44	0	0	0	-0.412	0	0	0
1903	-0.366	0	0	0	-0.407	0	0	0	-0.56	0	0	0	-0.481	0	0	0
1904	-0.499	0	0	0	-0.498	0	0	0	-0.557	0	0	0	-0.528	0	0	0
1905	-0.27	0	0	0	-0.353	0	0	0	-0.418	0	0	0	-0.383	0	0	0
1906	-0.255	0	0	0	-0.223	0	0	0	-0.366	0	0	0	-0.293	0	0	0
1907	-0.376	0	0	0	-0.497	0	0	0	-0.453	0	0	0	-0.474	0	0	0
1908	-0.492	0	0	0	-0.474	0	0	0	-0.569	0	0	0	-0.522	0	0	0
1909	-0.47	0	0	0	-0.474	0	0	0	-0.602	0	0	0	-0.537	0	0	0
1910	-0.509	0	0	0	-0.428	0	0	0	-0.568	0	0	0	-0.497	0	0	0
1911	-0.497	0	0	0	-0.435	0	0	0	-0.673	0	0	0	-0.553	0	0	0
1912	-0.254	0	0	0	-0.481	0	0	0	-0.419	0	0	0	-0.448	0	0	0
1913	-0.381	0	0	0	-0.463	0	0	0	-0.412	0	0	0	-0.438	0	0	0
1914	-0.223	0	0	0	-0.255	0	0	0	-0.259	0	0	0	-0.256	0	0	0
1915	-0.054	0	0	0	-0.148	0	0	0	-0.181	0	0	0	-0.163	0	0	0
1916	-0.404	0	0	0	-0.397	0	0	0	-0.395	0	0	0	-0.397	0	0	0
1917	-0.553	0	0	0	-0.509	0	0	0	-0.446	0	0	0	-0.477	0	0	0
1918	-0.346	0	0	0	-0.366	0	0	0	-0.318	0	0	0	-0.342	0	0	0
1919	-0.218	0	0	0	-0.376	0	0	0	-0.189	0	0	0	-0.282	0	0	0
1920	-0.279	0	0	0	-0.282	0	0	0	-0.22	0	0	0	-0.25	0	0	0
1921	-0.25	0	0	0	-0.108	0	0	0	-0.28	0	0	0	-0.192	0	0	0
1922	-0.302	0	0	0	-0.256	0	0	0	-0.364	0	0	0	-0.309	0	0	0
1923	-0.253	0	0	0	-0.226	0	0	0	-0.328	0	0	0	-0.275	0	0	0
1924	-0.232	0	0	0	-0.224	68.8054	0.272401	100	-0.376	0	0	0	-0.3	0	0	0
1925	-0.218	45.4971	0.221204	100	-0.12	0	0	0	-0.322	0	0	0	-0.219	0	0	0
1926	0.041	0	0	0	-0.014	0	0	0	-0.212	0	0	0	-0.112	0	0	0
1927	-0.115	0	0	0	-0.117	0	0	0	-0.312	0	0	0	-0.213	0	0	0
1928	-0.134	0	0	0	-0.148	0	0	0	-0.28	0	0	0	-0.213	0	0	0
1929	-0.247	0	0	0	-0.318	0	0	0	-0.39	0	0	0	-0.353	73.443	0.260131	100
1930	-0.081	0	0	0	-0.016	0	0	0	-0.267	0	0	0	-0.141	0	0	0
1931	0.068	0	0	0	0.031	0	0	0	-0.21	0	0	0	-0.089	0	0	0
1932	-0.111	0	0	0	-0.071	0	0	0	-0.205	0	0	0	-0.137	0	0	0
1933	-0.21	0	0	0	-0.245	0	0	0	-0.307	0	0	0	-0.274	0	0	0
1934	-0.187	0	0	0	-0.038	0	0	0	-0.223	0	0	0	-0.13	0	0	0
1935	-0.133	0	0	0	-0.099	0	0	0	-0.255	0	0	0	-0.176	0	0	0
1936	-0.096	0	0	0	-0.048	0	0	0	-0.243	72.8968	0.270008	100	-0.145	0	0	0
1937	0.015	0	0	0	0.069	0	0	0	-0.127	0	0	0	-0.028	0	0	0
1938	-0.102	0	0	0	0.104	0	0	0	-0.119	0	0	0	-0.006	0	0	0
1939	-0.114	0	0	0	0.032	0	0	0	-0.146	0	0	0	-0.056	0	0	0
1940	0.126	0	0	0	0.007	0	0	0	0.026	0	0	0	0.017	0	0	0
1941	0.24	0	0	0	0.03	0	0	0	0.005	0	0	0	0.017	0	0	0
1942	0.006	0	0	0	0.019	0	0	0	-0.068	0	0	0	-0.025	0	0	0
1943	-0.109	0	0	0	0.102	0	0	0	-0.107	0	0	0	-0.002	0	0	0
1944	0.08	0	0	0	0.187	0	0	0	0.107	0	0	0	0.147	0	0	0
1945	0.063	0	0	0	0.019	0	0	0	0.047	0	0	0	0.033	0	0	0
1946	-0.002	0	0	0	0.02	0	0	0	-0.157	0	0	0	-0.069	0	0	0
1947	0.015	0	0	0	0.006	0	0	0	-0.092	0	0	0	-0.042	0	0	0
1948	-0.05	0	0	0	0.074	0	0	0	-0.146	0	0	0	-0.037	0	0	0
1949	-0.112	0	0	0	-0.032	0	0	0	-0.121	0	0	0	-0.075	0	0	0
1950	-0.222	0	0	0	-0.176	0	0	0	-0.178	0	0	0	-0.175	0	0	0
1951	-0.042	0	0	0	0.046	0	0	0	-0.147	0	0	0	-0.049	0	0	0
1952	0.077	0	0	0	0.035	0	0	0	0.027	0	0	0	0.031	0	0	0
1953	0.082	0	0	0	0.193	0	0	0	0.008	0	0	0	0.1	0	0	0
1954	-0.154	0	0	0	-0.066	0	0	0	-0.195	0	0	0	-0.13	0	0	0
1955	-0.278	0	0	0	-0.092	0	0	0	-0.278	0	0	0	-0.186	0	0	0
1956	-0.31	0	0	0	-0.266	0	0	0	-0.256	0	0	0	-0.264	0	0	0
1957	0.021	0	0	0	0.007	0	0	0	-0.014	0	0	0	-0.003	0	0	0
1958	0.151	0	0	0	0.117	0	0	0	-0.016	0	0	0	0.049	0	0	0
1959	0.045	0	0	0	0.068	0	0	0	-0.033	0	0	0	0.017	0	0	0
1960	-0.018	0	0	0	0.011	0	0	0	-0.107	0	0	0	-0.048	0	0	0
1961	-0.032	0	0	0	0.065	0	0	0	0.015	0	0	0	0.039	0	0	0
1962	-0.074	0	0	0	0.091	0	0	0	-0.057	0	0	0	0.017	0	0	0
1963	0.078	0	0	0	0.148	0	0	0	-0.047	0	0	0	0.05	0	0	0
1964	-0.146	0	0	0	-0.17	0	0	0	-0.274	0	0	0	-0.222	0	0	0
1965	-0.073	0	0	0	-0.135	0	0	0	-0.147	0	0	0	-0.141	0	0	0
1966	0.039	0	0	0	0	0	0	0	-0.144	0	0	0	-0.072	0	0	0
1967	-0.15	0	0	0	0.023	0	0	0	-0.176	0	0	0	-0.076	0	0	0
1968	-0.113	0	0	0	-0.062	0	0	0	-0.161	0	0	0	-0.112	0	0	0
1969	0.245	0	0	0	-0.055	0	0	0	0.117	0	0	0	0.03	0	0	0
1970	0.007	0	0	0	-0.056	0	0	0	0.001	0	0	0	-0.028	0	0	0
1971	-0.29	0	0	0	-0.193	0	0	0	-0.175	0	0	0	-0.184	0	0	0
1972	0.039	0	0	0	-0.225	0	0	0	0.088	0	0	0	-0.068	0	0	0
1973	0.065	0	0	0	0.028	0	0	0	0.1	0	0	0	0.064	0	0	0
1974	-0.291	0	0	0	-0.257	0	0	0	-0.163	0	0	0	-0.211	0	0	0
1975	-0.328	0	0	0	-0.119	0	0	0	-0.171	0	0	0	-0.145	0	0	0
1976	-0.246	0	0	0	-0.289	0	0	0	-0.187	0	0	0	-0.238	0	0	0
1977	0.019	0	0	0	0.034	0	0	0	0.058	0	0	0	0.046	0	0	0
1978	-0.063	20.7814	0.189416	100	-0.058	0	0	0	-0.067	31.1309	0.213005	100	-0.062	30.5101	0.203763	100
1979	0.081	0	0	0	0.008	0	0	0	0.105	0	0	0	0.057	0	0	0
1980	0.135	0	0	0	0.07	0	0	0	0.115	0	0	0	0.093	0	0	0
1981	0.017	0	0	0	0.236	0	0	0	0.045	0	0	0	0.14	0	0	0
1982	0.065	0	0	0	-0.025	0	0	0	0.047	0	0	0	0.011	0	0	0
1983	0.215	0	0	0	0.169	0	0	0	0.21	0	0	0	0.19	0	0	0
1984	0.001	0	0	0	-0.084	0	0	0	0.054	0	0	0	-0.015	0	0	0
1985	-0.062	0	0	0	-0.13	0	0	0	0.071	0	0	0	-0.029	0	0	0
1986	0.05	0	0	0	0.025	26.3202	0.266695	100	0.068	0	0	0	0.046	0	0	0
1987	0.349	0	0	0	0.151	0	0	0	0.224	0	0	0	0.187	0	0	0
1988	0.206	0	0	0	0.234	0	0	0	0.166	0	0	0	0.2	0	0	0
1989	-0.012	0	0	0	0.164	0	0	0	0.077	0	0	0	0.12	0	0	0
1990	0.202	0	0	0	0.409	0	0	0	0.18	0	0	0	0.294	0	0	0
1991	0.203	0	0	0	0.317	0	0	0	0.192	0	0	0	0.255	0	0	0
1992	0.108	0	0	0	0.075	0	0	0	0.134	0	0	0	0.104	0	0	0
1993	0.157	0	0	0	0.128	0	0	0	0.162	0	0	0	0.145	0	0	0
1994	0.156	0	0	0	0.278	0	0	0	0.137	0	0	0	0.206	0	0	0
1995	0.281	0	0	0	0.47	0	0	0	0.173	0	0	0	0.323	0	0	0
1996	0.191	21.1766	0.270829	100	0.173	19.0044	0.38383	100	0.188	25.0642	0.19623	100	0.181	27.4944	0.335989	100
1997	0.366	0	0	0	0.455	0	0	0	0.323	0	0	0	0.39	0	0	0
1998	0.561	0	0	0	0.612	0	0	0	0.461	0	0	0	0.535	0	0	0
1999	0.155	0	0	0	0.407	0	0	0	0.205	0	0	0	0.307	0	0	0
2000	0.168	0	0	0	0.405	0	0	0	0.184	0	0	0	0.294	0	0	0
2001	0.345	0	0	0	0.557	0	0	0	0.32	0	0	0	0.439	0	0	0
2002	0.464	0	0	0	0.593	0	0	0	0.395	0	0	0	0.495	0	0	0
2003	0.503	0	0	0	0.643	0	0	0	0.371	0	0	0	0.507	0	0	0
2004	0.428	0	0	0	0.606	0	0	0	0.286	0	0	0	0.448	0	0	0
2005	0.477	0	0	0	0.727	0	0	0	0.359	0	0	0	0.543	0	0	0
2006	0.444	0	0	0	0.677	0	0	0	0.333	0	0	0	0.505	0	0	0
2007	0.362	0	0	0	0.719	0	0	0	0.266	0	0	0	0.493	0	0	0
2008	0.271	0	0	0	0.569	0	0	0	0.218	0	0	0	0.394	0	0	0
2009	0.538	0	0	0	0.596	0	0	0	0.412	0	0	0	0.504	0	0	0
2010	0.53	0	0	0	0.733	0	0	0	0.377	0	0	0	0.555	0	0	0
2011	0.241	0	0	0	0.57	0	0	0	0.273	0	0	0	0.421	0	0	0
2012	0.339	0	0	0	0.626	0	0	0	0.309	0	0	0	0.467	0	0	0
2013	0.392	0	0	0	0.636	0	0	0	0.35	0	0	0	0.492	0	0	0
2014	0.51	0	0	0	0.75	0	0	0	0.378	0	0	0	0.564	0	0	0
2015	0.51	0	0	0	0.962	0	0	0	0.386	0	0	0	0.675	0	0	0
years/ys	30S_30N	nh	sh	ns_avg
1850	-0.313	-0.331	-0.413	-0.376
1851	-0.229	-0.168	-0.274	-0.222
1852	-0.135	-0.102	-0.348	-0.225
1853	-0.141	-0.177	-0.364	-0.27
1854	-0.196	-0.074	-0.42	-0.247
1855	-0.243	-0.187	-0.349	-0.27
1856	-0.299	-0.378	-0.336	-0.36
1857	-0.524	-0.406	-0.511	-0.457
1858	-0.477	-0.398	-0.525	-0.463
1859	-0.359	-0.216	-0.358	-0.284
1860	-0.292	-0.357	-0.33	-0.341
1861	-0.435	-0.288	-0.505	-0.398
1862	-0.38	-0.647	-0.374	-0.508
1863	-0.393	-0.203	-0.358	-0.28
1864	-0.498	-0.503	-0.461	-0.48
1865	-0.198	-0.24	-0.304	-0.269
1866	-0.251	-0.191	-0.285	-0.24
1867	-0.142	-0.32	-0.281	-0.304
1868	-0.143	-0.104	-0.337	-0.22
1869	-0.152	-0.122	-0.387	-0.256
1870	-0.23	-0.192	-0.344	-0.271
1871	-0.169	-0.381	-0.263	-0.324
1872	-0.319	-0.192	-0.263	-0.228
1873	-0.305	-0.296	-0.307	-0.302
1874	-0.478	-0.282	-0.461	-0.371
1875	-0.251	-0.532	-0.287	-0.408
1876	-0.336	-0.342	-0.417	-0.38
1877	0.102	0.015	-0.153	-0.07
1878	0.208	0.189	-0.114	0.035
1879	-0.216	-0.224	-0.234	-0.229
1880	-0.216	-0.233	-0.212	-0.225
1881	-0.052	-0.244	-0.16	-0.204
1882	-0.235	-0.236	-0.187	-0.212
1883	-0.299	-0.353	-0.227	-0.29
1884	-0.363	-0.462	-0.345	-0.403
1885	-0.282	-0.362	-0.406	-0.385
1886	-0.338	-0.337	-0.402	-0.369
1887	-0.445	-0.354	-0.485	-0.42
1888	-0.08	-0.272	-0.353	-0.314
1889	-0.061	-0.142	-0.212	-0.178
1890	-0.525	-0.367	-0.479	-0.422
1891	-0.255	-0.302	-0.387	-0.342
1892	-0.463	-0.473	-0.454	-0.461
1893	-0.502	-0.545	-0.41	-0.476
1894	-0.496	-0.381	-0.444	-0.411
1895	-0.271	-0.38	-0.414	-0.396
1896	-0.029	-0.163	-0.223	-0.194
1897	-0.003	-0.155	-0.272	-0.214
1898	-0.351	-0.295	-0.535	-0.414
1899	-0.208	-0.227	-0.359	-0.293
1900	0.019	-0.09	-0.316	-0.201
1901	-0.13	-0.139	-0.398	-0.268
1902	-0.178	-0.387	-0.44	-0.412
1903	-0.366	-0.407	-0.56	-0.481
1904	-0.499	-0.498	-0.557	-0.528
1905	-0.27	-0.353	-0.418	-0.383
1906	-0.255	-0.223	-0.366	-0.293
1907	-0.376	-0.497	-0.453	-0.474
1908	-0.492	-0.474	-0.569	-0.522
1909	-0.47	-0.474	-0.602	-0.537
1910	-0.509	-0.428	-0.568	-0.497
1911	-0.497	-0.435	-0.673	-0.553
1912	-0.254	-0.481	-0.419	-0.448
1913	-0.381	-0.463	-0.412	-0.438
1914	-0.223	-0.255	-0.259	-0.256
1915	-0.054	-0.148	-0.181	-0.163
1916	-0.404	-0.397	-0.395	-0.397
1917	-0.553	-0.509	-0.446	-0.477
1918	-0.346	-0.366	-0.318	-0.342
1919	-0.218	-0.376	-0.189	-0.282
1920	-0.279	-0.282	-0.22	-0.25
1921	-0.25	-0.108	-0.28	-0.192
1922	-0.302	-0.256	-0.364	-0.309
1923	-0.253	-0.226	-0.328	-0.275
1924	-0.232	-0.224	-0.376	-0.3
1925	-0.218	-0.12	-0.322	-0.219
1926	0.041	-0.014	-0.212	-0.112
1927	-0.115	-0.117	-0.312	-0.213
1928	-0.134	-0.148	-0.28	-0.213
1929	-0.247	-0.318	-0.39	-0.353
1930	-0.081	-0.016	-0.267	-0.141
1931	0.068	0.031	-0.21	-0.089
1932	-0.111	-0.071	-0.205	-0.137
1933	-0.21	-0.245	-0.307	-0.274
1934	-0.187	-0.038	-0.223	-0.13
1935	-0.133	-0.099	-0.255	-0.176
1936	-0.096	-0.048	-0.243	-0.145
1937	0.015	0.069	-0.127	-0.028
1938	-0.102	0.104	-0.119	-0.006
1939	-0.114	0.032	-0.146	-0.056
1940	0.126	0.007	0.026	0.017
1941	0.24	0.03	0.005	0.017
1942	0.006	0.019	-0.068	-0.025
1943	-0.109	0.102	-0.107	-0.002
1944	0.08	0.187	0.107	0.147
1945	0.063	0.019	0.047	0.033
1946	-0.002	0.02	-0.157	-0.069
1947	0.015	0.006	-0.092	-0.042
1948	-0.05	0.074	-0.146	-0.037
1949	-0.112	-0.032	-0.121	-0.075
1950	-0.222	-0.176	-0.178	-0.175
1951	-0.042	0.046	-0.147	-0.049
1952	0.077	0.035	0.027	0.031
1953	0.082	0.193	0.008	0.1
1954	-0.154	-0.066	-0.195	-0.13
1955	-0.278	-0.092	-0.278	-0.186
1956	-0.31	-0.266	-0.256	-0.264
1957	0.021	0.007	-0.014	-0.003
1958	0.151	0.117	-0.016	0.049
1959	0.045	0.068	-0.033	0.017
1960	-0.018	0.011	-0.107	-0.048
1961	-0.032	0.065	0.015	0.039
1962	-0.074	0.091	-0.057	0.017
1963	0.078	0.148	-0.047	0.05
1964	-0.146	-0.17	-0.274	-0.222
1965	-0.073	-0.135	-0.147	-0.141
1966	0.039	0	-0.144	-0.072
1967	-0.15	0.023	-0.176	-0.076
1968	-0.113	-0.062	-0.161	-0.112
1969	0.245	-0.055	0.117	0.03
1970	0.007	-0.056	0.001	-0.028
1971	-0.29	-0.193	-0.175	-0.184
1972	0.039	-0.225	0.088	-0.068
1973	0.065	0.028	0.1	0.064
1974	-0.291	-0.257	-0.163	-0.211
1975	-0.328	-0.119	-0.171	-0.145
1976	-0.246	-0.289	-0.187	-0.238
1977	0.019	0.034	0.058	0.046
1978	-0.063	-0.058	-0.067	-0.062
1979	0.081	0.008	0.105	0.057
1980	0.135	0.07	0.115	0.093
1981	0.017	0.236	0.045	0.14
1982	0.065	-0.025	0.047	0.011
1983	0.215	0.169	0.21	0.19
1984	0.001	-0.084	0.054	-0.015
1985	-0.062	-0.13	0.071	-0.029
1986	0.05	0.025	0.068	0.046
1987	0.349	0.151	0.224	0.187
1988	0.206	0.234	0.166	0.2
1989	-0.012	0.164	0.077	0.12
1990	0.202	0.409	0.18	0.294
1991	0.203	0.317	0.192	0.255
1992	0.108	0.075	0.134	0.104
1993	0.157	0.128	0.162	0.145
1994	0.156	0.278	0.137	0.206
1995	0.281	0.47	0.173	0.323
1996	0.191	0.173	0.188	0.181
1997	0.366	0.455	0.323	0.39
1998	0.561	0.612	0.461	0.535
1999	0.155	0.407	0.205	0.307
2000	0.168	0.405	0.184	0.294
2001	0.345	0.557	0.32	0.439
2002	0.464	0.593	0.395	0.495
2003	0.503	0.643	0.371	0.507
2004	0.428	0.606	0.286	0.448
2005	0.477	0.727	0.359	0.543
2006	0.444	0.677	0.333	0.505
2007	0.362	0.719	0.266	0.493
2008	0.271	0.569	0.218	0.394
2009	0.538	0.596	0.412	0.504
2010	0.53	0.733	0.377	0.555
2011	0.241	0.57	0.273	0.421
2012	0.339	0.626	0.309	0.467
2013	0.392	0.636	0.35	0.492
2014	0.51	0.75	0.378	0.564
2015	0.51	0.962	0.386	0.675
years/Ti	30S_30N_Ti	nh_Ti	sh_Ti	ns_avg_Ti
1850	0	0	0	0
1851	0	0	0	0
1852	0	0	0	0
1853	0	0	0	0
1854	0	0	0	0
1855	0	0	0	0
1856	0	0	0	0
1857	0	0	0	0
1858	0	0	0	0
1859	0	0	0	0
1860	0	0	0	0
1861	0	0	0	0
1862	0	0	0	0
1863	0	0	0	0
1864	0	0	0	0
1865	0	0	0	0
1866	0	0	0	0
1867	0	0	0	0
1868	0	0	0	0
1869	0	0	0	0
1870	0	0	0	0
1871	0	0	0	0
1872	0	0	0	0
1873	0	0	0	0
1874	0	0	0	0
1875	0	0	0	0
1876	0	0	0	0
1877	0	0	0	0
1878	0	0	0	0
1879	0	0	0	0
1880	0	0	0	0
1881	0	0	0	0
1882	0	0	0	0
1883	0	0	0	0
1884	0	0	0	0
1885	0	0	0	0
1886	0	0	0	0
1887	0	0	0	0
1888	0	0	0	0
1889	0	0	0	0
1890	0	0	0	0
1891	0	0	0	0
1892	0	0	0	0
1893	0	0	0	0
1894	0	0	0	0
1895	0	0	0	0
1896	0	0	0	0
1897	0	0	0	0
1898	0	0	0	0
1899	0	0	0	0
1900	0	0	0	0
1901	0	0	0	0
1902	0	0	0	0
1903	0	0	0	0
1904	0	0	0	0
1905	0	0	0	0
1906	0	0	0	0
1907	0	0	0	0
1908	0	0	0	0
1909	0	0	0	0
1910	0	0	0	0
1911	0	0	0	0
1912	0	0	0	0
1913	0	0	0	0
1914	0	0	0	0
1915	0	0	0	0
1916	0	0	0	0
1917	0	0	0	0
1918	0	0	0	0
1919	0	0	0	0
1920	0	0	0	0
1921	0	0	0	0
1922	0	0	0	0
1923	0	0	0	0
1924	0	68.8054	0	0
1925	45.4971	0	0	0
1926	0	0	0	0
1927	0	0	0	0
1928	0	0	0	0
1929	0	0	0	73.443
1930	0	0	0	0
1931	0	0	0	0
1932	0	0	0	0
1933	0	0	0	0
1934	0	0	0	0
1935	0	0	0	0
1936	0	0	72.8968	0
1937	0	0	0	0
1938	0	0	0	0
1939	0	0	0	0
1940	0	0	0	0
1941	0	0	0	0
1942	0	0	0	0
1943	0	0	0	0
1944	0	0	0	0
1945	0	0	0	0
1946	0	0	0	0
1947	0	0	0	0
1948	0	0	0	0
1949	0	0	0	0
1950	0	0	0	0
1951	0	0	0	0
1952	0	0	0	0
1953	0	0	0	0
1954	0	0	0	0
1955	0	0	0	0
1956	0	0	0	0
1957	0	0	0	0
1958	0	0	0	0
1959	0	0	0	0
1960	0	0	0	0
1961	0	0	0	0
1962	0	0	0	0
1963	0	0	0	0
1964	0	0	0	0
1965	0	0	0	0
1966	0	0	0	0
1967	0	0	0	0
1968	0	0	0	0
1969	0	0	0	0
1970	0	0	0	0
1971	0	0	0	0
1972	0	0	0	0
1973	0	0	0	0
1974	0	0	0	0
1975	0	0	0	0
1976	0	0	0	0
1977	0	0	0	0
1978	20.7814	0	31.1309	30.5101
1979	0	0	0	0
1980	0	0	0	0
1981	0	0	0	0
1982	0	0	0	0
1983	0	0	0	0
1984	0	0	0	0
1985	0	0	0	0
1986	0	26.3202	0	0
1987	0	0	0	0
1988	0	0	0	0
1989	0	0	0	0
1990	0	0	0	0
1991	0	0	0	0
1992	0	0	0	0
1993	0	0	0	0
1994	0	0	0	0
1995	0	0	0	0
1996	21.1766	19.0044	25.0642	27.4944
1997	0	0	0	0
1998	0	0	0	0
1999	0	0	0	0
2000	0	0	0	0
2001	0	0	0	0
2002	0	0	0	0
2003	0	0	0	0
2004	0	0	0	0
2005	0	0	0	0
2006	0	0	0	0
2007	0	0	0	0
2008	0	0	0	0
2009	0	0	0	0
2010	0	0	0	0
2011	0	0	0	0
2012	0	0	0	0
2013	0	0	0	0
2014	0	0	0	0
2015	0	0	0	0
years/Shifts	30S_30N_Ti	nh_Ti	sh_Ti	ns_avg_Ti
1850	0	0	0	0
1851	0	0	0	0
1852	0	0	0	0
1853	0	0	0	0
1854	0	0	0	0
1855	0	0	0	0
1856	0	0	0	0
1857	0	0	0	0
1858	0	0	0	0
1859	0	0	0	0
1860	0	0	0	0
1861	0	0	0	0
1862	0	0	0	0
1863	0	0	0	0
1864	0	0	0	0
1865	0	0	0	0
1866	0	0	0	0
1867	0	0	0	0
1868	0	0	0	0
1869	0	0	0	0
1870	0	0	0	0
1871	0	0	0	0
1872	0	0	0	0
1873	0	0	0	0
1874	0	0	0	0
1875	0	0	0	0
1876	0	0	0	0
1877	0	0	0	0
1878	0	0	0	0
1879	0	0	0	0
1880	0	0	0	0
1881	0	0	0	0
1882	0	0	0	0
1883	0	0	0	0
1884	0	0	0	0
1885	0	0	0	0
1886	0	0	0	0
1887	0	0	0	0
1888	0	0	0	0
1889	0	0	0	0
1890	0	0	0	0
1891	0	0	0	0
1892	0	0	0	0
1893	0	0	0	0
1894	0	0	0	0
1895	0	0	0	0
1896	0	0	0	0
1897	0	0	0	0
1898	0	0	0	0
1899	0	0	0	0
1900	0	0	0	0
1901	0	0	0	0
1902	0	0	0	0
1903	0	0	0	0
1904	0	0	0	0
1905	0	0	0	0
1906	0	0	0	0
1907	0	0	0	0
1908	0	0	0	0
1909	0	0	0	0
1910	0	0	0	0
1911	0	0	0	0
1912	0	0	0	0
1913	0	0	0	0
1914	0	0	0	0
1915	0	0	0	0
1916	0	0	0	0
1917	0	0	0	0
1918	0	0	0	0
1919	0	0	0	0
1920	0	0	0	0
1921	0	0	0	0
1922	0	0	0	0
1923	0	0	0	0
1924	0	0.272401	0	0
1925	0.221204	0	0	0
1926	0	0	0	0
1927	0	0	0	0
1928	0	0	0	0
1929	0	0	0	0.260131
1930	0	0	0	0
1931	0	0	0	0
1932	0	0	0	0
1933	0	0	0	0
1934	0	0	0	0
1935	0	0	0	0
1936	0	0	0.270008	0
1937	0	0	0	0
1938	0	0	0	0
1939	0	0	0	0
1940	0	0	0	0
1941	0	0	0	0
1942	0	0	0	0
1943	0	0	0	0
1944	0	0	0	0
1945	0	0	0	0
1946	0	0	0	0
1947	0	0	0	0
1948	0	0	0	0
1949	0	0	0	0
1950	0	0	0	0
1951	0	0	0	0
1952	0	0	0	0
1953	0	0	0	0
1954	0	0	0	0
1955	0	0	0	0
1956	0	0	0	0
1957	0	0	0	0
1958	0	0	0	0
1959	0	0	0	0
1960	0	0	0	0
1961	0	0	0	0
1962	0	0	0	0
1963	0	0	0	0
1964	0	0	0	0
1965	0	0	0	0
1966	0	0	0	0
1967	0	0	0	0
1968	0	0	0	0
1969	0	0	0	0
1970	0	0	0	0
1971	0	0	0	0
1972	0	0	0	0
1973	0	0	0	0
1974	0	0	0	0
1975	0	0	0	0
1976	0	0	0	0
1977	0	0	0	0
1978	0.189416	0	0.213005	0.203763
1979	0	0	0	0
1980	0	0	0	0
1981	0	0	0	0
1982	0	0	0	0
1983	0	0	0	0
1984	0	0	0	0
1985	0	0	0	0
1986	0	0.266695	0	0
1987	0	0	0	0
1988	0	0	0	0
1989	0	0	0	0
1990	0	0	0	0
1991	0	0	0	0
1992	0	0	0	0
1993	0	0	0	0
1994	0	0	0	0
1995	0	0	0	0
1996	0.270829	0.38383	0.19623	0.335989
1997	0	0	0	0
1998	0	0	0	0
1999	0	0	0	0
2000	0	0	0	0
2001	0	0	0	0
2002	0	0	0	0
2003	0	0	0	0
2004	0	0	0	0
2005	0	0	0	0
2006	0	0	0	0
2007	0	0	0	0
2008	0	0	0	0
2009	0	0	0	0
2010	0	0	0	0
2011	0	0	0	0
2012	0	0	0	0
2013	0	0	0	0
2014	0	0	0	0
2015	0	0	0	0
years	freq
30S_30N	100
nh	100
sh	100
ns_avg	100
metadata
30S_30N	['30S_30N'	[''	['losed'	''	'16:18:42	Tue	26-May-2015']]]
['30S_30N'	[''	['ersion'	'numbers']]]
['30S_30N'	[''	['huffleRpt'	'$Revision$']]]
['30S_30N'	[''	['huffle'	'$Revision:'	'286'	'$']]]
['30S_30N'	[''	['ivariate_multi'	'as'	'bivariate'	'$Revision:'	'297'	'$']]]
['30S_30N'	[''	['onvergentBreaks'	'as'	'convergent_breaks'	'$Revision:'	'286'	'$']]]
['30S_30N'	[''	['egress'	'$Revision:'	'291'	'$']]]
['30S_30N'	[''	['tatbreaks'	'$Revision:'	'288'	'$']]]
nh	['nh'	[''	['losed'	''	'16:18:47	Tue	26-May-2015']]]
['nh'	[''	['ersion'	'numbers']]]
['nh'	[''	['huffleRpt'	'$Revision$']]]
['nh'	[''	['huffle'	'$Revision:'	'286'	'$']]]
['nh'	[''	['ivariate_multi'	'as'	'bivariate'	'$Revision:'	'297'	'$']]]
['nh'	[''	['onvergentBreaks'	'as'	'convergent_breaks'	'$Revision:'	'286'	'$']]]
['nh'	[''	['egress'	'$Revision:'	'291'	'$']]]
['nh'	[''	['tatbreaks'	'$Revision:'	'288'	'$']]]
sh	['sh'	[''	['losed'	''	'16:18:52	Tue	26-May-2015']]]
['sh'	[''	['ersion'	'numbers']]]
['sh'	[''	['huffleRpt'	'$Revision$']]]
['sh'	[''	['huffle'	'$Revision:'	'286'	'$']]]
['sh'	[''	['ivariate_multi'	'as'	'bivariate'	'$Revision:'	'297'	'$']]]
['sh'	[''	['onvergentBreaks'	'as'	'convergent_breaks'	'$Revision:'	'286'	'$']]]
['sh'	[''	['egress'	'$Revision:'	'291'	'$']]]
['sh'	[''	['tatbreaks'	'$Revision:'	'288'	'$']]]
ns_avg	['ns_avg'	[''	['losed'	''	'16:18:57	Tue	26-May-2015']]]
['ns_avg'	[''	['ersion'	'numbers']]]
['ns_avg'	[''	['huffleRpt'	'$Revision$']]]
['ns_avg'	[''	['huffle'	'$Revision:'	'286'	'$']]]
['ns_avg'	[''	['ivariate_multi'	'as'	'bivariate'	'$Revision:'	'297'	'$']]]
['ns_avg'	[''	['onvergentBreaks'	'as'	'convergent_breaks'	'$Revision:'	'286'	'$']]]
['ns_avg'	[''	['egress'	'$Revision:'	'291'	'$']]]
['ns_avg'	[''	['tatbreaks'	'$Revision:'	'288'	'$']]]

## Sheet: Readme HadCRUT.4.3
HadCRUT.4.3.0.0.annual
HadCRUT4.3.3
Annual files for HadCRUT.4.3.0.0 and HadSST.3.1.1.0 were downloaded 25 May 2015
For both versions zonal series were over: Northern and Southern hemispheres (median of 100 realisations), the “global” is computed as mean of the two hemispheres, and 30S-30N.
The analysis in this file is of annual data as supplied not from monthly data http://www.metoffice.gov.uk/hadobs/hadcrut4/data/current/download.html
It is supplied to match the contents of HadSST.3.1.1.0_annual.xlsx
It was inituially saved under the name hadcrut_20150525.xlsx and renamed for consistency with the HadSST.3.1.1.0_annual.xlsx
Data format
The site http://www.metoffice.gov.uk/hadobs/hadcrut4/data/current/series_format.html documents the format used, and reads in part …
These 'best estimate' series are computed as the medians of regional time series computed for each of the 100 ensemble member realisations. Time series are presented as temperature anomalies (deg C) relative to 1961-1990.
Quoted uncertainties are computed by integrating across the distribution described by the 100 ensemble members, together with additional measurement and sampling error and coverage uncertainty information.
The data files contain 12 columns:
§ Column 1 is the date.
§ Column 2 is the median of the 100 ensemble member time series.
§ Columns 3 and 4 are the lower and upper bounds of the 95% confidence interval of bias uncertainty computed from the 100 member ensemble.
§ Columns 5 and 6 are the lower and upper bounds of the 95% confidence interval of measurement and sampling uncertainties around the ensemble median. These are the combination of fully uncorrelated measurement and sampling uncertainties and partially correlated uncertainties described by the HadCRUT4 error covariance matrices.
§ Columns 7 and 8 are the lower and upper bounds of the 95% confidence interval of coverage uncertainties around the ensemble median.
§ Columns 9 and 10 are the lower and upper bounds of the 95% confidence interval of the combination of measurement and sampling and bias uncertainties.
§ Columns 11 and 12 are the lower and upper bounds of the 95% confidence interval of the combined effects of all the uncertainties described in the HadCRUT4 error model (measurement and sampling, bias and coverage uncertainties).
For example, the first two lines of HadCRUT.4.3.0.0.annual_ns_avg.txt read
1850 -0.376 -0.427 -0.338 -0.507 -0.246 -0.542 -0.211 -0.518 -0.239 -0.595 -0.162
1851 -0.222 -0.276 -0.187 -0.356 -0.089 -0.374 -0.070 -0.369 -0.084 -0.435 -0.018
Whereas the first two lines of HadCRUT.4.3.0.0.monthly_ns_avg.txt read
1850/01 -0.701 -0.756 -0.628 -0.892 -0.510 -1.046 -0.356 -0.899 -0.499 -1.098 -0.300
1850/02 -0.284 -0.341 -0.218 -0.473 -0.094 -0.620 0.052 -0.484 -0.081 -0.675 0.109
Data citation.
We cite (Morice et al., 2012) as requested.

## Sheet: HadSST.3.1.1.0_annual
Seq	Source	BreakSet	DatasetNo	SetNo	SetNoInData	Type	Model	Treat	%BreakSet	Year	Predecessor	Successor	%SegmentFound	Ti	Shift	%YearOverall	ModalYear	ModalValue	SecondModalYear	SecondModalValue
1	HadSST.3.1.1.0_annual_globe_ts.final.csv	[1850.0, 1935, 1986, 1996, 2015.0]	1	1	1	globe	HadSST.3.1.1.0	Annual	100	1935	1850	1986	100	82.3115	0.279393	100	1935	0.79	1936	0.13
2	HadSST.3.1.1.0_annual_globe_ts.final.csv	[1850.0, 1935, 1986, 1996, 2015.0]	1	1	1	globe	HadSST.3.1.1.0	Annual	100	1986	1935	1996	100	19.9706	0.154721	100	1986	1	0	0
3	HadSST.3.1.1.0_annual_globe_ts.final.csv	[1850.0, 1935, 1986, 1996, 2015.0]	1	1	1	globe	HadSST.3.1.1.0	Annual	100	1996	1986	2015	100	20.11	0.213979	100	1996	0.99	2000	0.01
Seq	Source	BreakSet	DatasetNo	SetNo	SetNoInData	Type	Model	Treat	%BreakSet	Year	Predecessor	Successor	%SegmentFound	Ti	Shift	%YearOverall	ModalYear	ModalValue	SecondModalYear	SecondModalValue
4	HadSST.3.1.1.0_annual_nh_ts.final.csv	[1850.0, 1901, 1920, 1935, 1996, 2015.0]	2	2	1	nh	HadSST.3.1.1.0	Annual	100	1901	1850	1920	100	24.1609	-0.211472	100	1901	1	0	0
5	HadSST.3.1.1.0_annual_nh_ts.final.csv	[1850.0, 1901, 1920, 1935, 1996, 2015.0]	2	2	1	nh	HadSST.3.1.1.0	Annual	100	1920	1901	1935	100	22.2661	0.256608	100	1920	0.69	1923	0.22
6	HadSST.3.1.1.0_annual_nh_ts.final.csv	[1850.0, 1901, 1920, 1935, 1996, 2015.0]	2	2	1	nh	HadSST.3.1.1.0	Annual	100	1935	1920	1996	100	23.78	0.178548	100	1935	0.97	1936	0.03
7	HadSST.3.1.1.0_annual_nh_ts.final.csv	[1850.0, 1901, 1920, 1935, 1996, 2015.0]	2	2	1	nh	HadSST.3.1.1.0	Annual	100	1996	1935	2015	100	54.9079	0.371326	100	1996	0.98	1993	0.02
Seq	Source	BreakSet	DatasetNo	SetNo	SetNoInData	Type	Model	Treat	%BreakSet	Year	Predecessor	Successor	%SegmentFound	Ti	Shift	%YearOverall	ModalYear	ModalValue	SecondModalYear	SecondModalValue
8	HadSST.3.1.1.0_annual_sh_ts.final.csv	[1850.0, 1936, 1978, 1996, 2015.0]	3	3	1	sh	HadSST.3.1.1.0	Annual	100	1936	1850	1978	100	76.4253	0.281372	100	1936	1	0	0
9	HadSST.3.1.1.0_annual_sh_ts.final.csv	[1850.0, 1936, 1978, 1996, 2015.0]	3	3	1	sh	HadSST.3.1.1.0	Annual	100	1978	1936	1996	100	28.511	0.184232	100	1978	0.94	1976	0.06
10	HadSST.3.1.1.0_annual_sh_ts.final.csv	[1850.0, 1936, 1978, 1996, 2015.0]	3	3	1	sh	HadSST.3.1.1.0	Annual	100	1996	1978	2015	100	27.0979	0.188906	100	1996	1	0	0
Seq	Source	BreakSet	DatasetNo	SetNo	SetNoInData	Type	Model	Treat	%BreakSet	Year	Predecessor	Successor	%SegmentFound	Ti	Shift	%YearOverall	ModalYear	ModalValue	SecondModalYear	SecondModalValue
11	HadSST.3.1.1.0_annual_tropics_ts.final.csv	[1850.0, 1925, 1978, 1996, 2015.0]	4	4	1	tropics	HadSST.3.1.1.0	Annual	100	1925	1850	1978	100	34.5451	0.213082	100	1925	0.92	1924	0.08
12	HadSST.3.1.1.0_annual_tropics_ts.final.csv	[1850.0, 1925, 1978, 1996, 2015.0]	4	4	1	tropics	HadSST.3.1.1.0	Annual	100	1978	1925	1996	100	15.0439	0.185524	100	1978	0.86	1981	0.08
13	HadSST.3.1.1.0_annual_tropics_ts.final.csv	[1850.0, 1925, 1978, 1996, 2015.0]	4	4	1	tropics	HadSST.3.1.1.0	Annual	100	1996	1978	2015	100	14.3502	0.22352	100	1996	0.93	1994	0.05

## Sheet: TS-HadSST
years	globe	globe_Ti	globe_shift	globe_freq	nh	nh_Ti	nh_shift	nh_freq	sh	sh_Ti	sh_shift	sh_freq	tropics	tropics_Ti	tropics_shift	tropics_freq
1850	-0.315	0	0	0	-0.246	0	0	0	-0.401	0	0	0	-0.265	0	0	0
1851	-0.191	0	0	0	-0.127	0	0	0	-0.274	0	0	0	-0.218	0	0	0
1852	-0.185	0	0	0	-0.026	0	0	0	-0.357	0	0	0	-0.154	0	0	0
1853	-0.217	0	0	0	-0.079	0	0	0	-0.363	0	0	0	-0.125	0	0	0
1854	-0.247	0	0	0	-0.054	0	0	0	-0.421	0	0	0	-0.163	0	0	0
1855	-0.213	0	0	0	-0.065	0	0	0	-0.349	0	0	0	-0.158	0	0	0
1856	-0.306	0	0	0	-0.29	0	0	0	-0.319	0	0	0	-0.294	0	0	0
1857	-0.435	0	0	0	-0.34	0	0	0	-0.499	0	0	0	-0.548	0	0	0
1858	-0.453	0	0	0	-0.379	0	0	0	-0.509	0	0	0	-0.486	0	0	0
1859	-0.33	0	0	0	-0.334	0	0	0	-0.335	0	0	0	-0.283	0	0	0
1860	-0.256	0	0	0	-0.154	0	0	0	-0.311	0	0	0	-0.341	0	0	0
1861	-0.404	0	0	0	-0.191	0	0	0	-0.498	0	0	0	-0.409	0	0	0
1862	-0.399	0	0	0	-0.483	0	0	0	-0.36	0	0	0	-0.385	0	0	0
1863	-0.358	0	0	0	-0.448	0	0	0	-0.307	0	0	0	-0.427	0	0	0
1864	-0.39	0	0	0	-0.237	0	0	0	-0.441	0	0	0	-0.53	0	0	0
1865	-0.236	0	0	0	-0.102	0	0	0	-0.285	0	0	0	-0.113	0	0	0
1866	-0.216	0	0	0	-0.132	0	0	0	-0.258	0	0	0	-0.167	0	0	0
1867	-0.218	0	0	0	-0.07	0	0	0	-0.281	0	0	0	-0.119	0	0	0
1868	-0.223	0	0	0	0.065	0	0	0	-0.335	0	0	0	-0.062	0	0	0
1869	-0.262	0	0	0	-0.055	0	0	0	-0.38	0	0	0	-0.171	0	0	0
1870	-0.231	0	0	0	-0.018	0	0	0	-0.332	0	0	0	-0.264	0	0	0
1871	-0.229	0	0	0	-0.194	0	0	0	-0.252	0	0	0	-0.182	0	0	0
1872	-0.228	0	0	0	-0.172	0	0	0	-0.262	0	0	0	-0.277	0	0	0
1873	-0.285	0	0	0	-0.247	0	0	0	-0.304	0	0	0	-0.31	0	0	0
1874	-0.398	0	0	0	-0.3	0	0	0	-0.428	0	0	0	-0.518	0	0	0
1875	-0.248	0	0	0	-0.226	0	0	0	-0.262	0	0	0	-0.253	0	0	0
1876	-0.356	0	0	0	-0.253	0	0	0	-0.423	0	0	0	-0.346	0	0	0
1877	-0.033	0	0	0	0.139	0	0	0	-0.162	0	0	0	0.112	0	0	0
1878	0.017	0	0	0	0.168	0	0	0	-0.12	0	0	0	0.297	0	0	0
1879	-0.187	0	0	0	-0.138	0	0	0	-0.201	0	0	0	-0.261	0	0	0
1880	-0.185	0	0	0	-0.142	0	0	0	-0.207	0	0	0	-0.22	0	0	0
1881	-0.148	0	0	0	-0.147	0	0	0	-0.161	0	0	0	-0.031	0	0	0
1882	-0.199	0	0	0	-0.221	0	0	0	-0.17	0	0	0	-0.273	0	0	0
1883	-0.235	0	0	0	-0.251	0	0	0	-0.217	0	0	0	-0.337	0	0	0
1884	-0.337	0	0	0	-0.332	0	0	0	-0.343	0	0	0	-0.373	0	0	0
1885	-0.324	0	0	0	-0.236	0	0	0	-0.411	0	0	0	-0.261	0	0	0
1886	-0.335	0	0	0	-0.252	0	0	0	-0.399	0	0	0	-0.298	0	0	0
1887	-0.399	0	0	0	-0.292	0	0	0	-0.477	0	0	0	-0.431	0	0	0
1888	-0.234	0	0	0	-0.097	0	0	0	-0.363	0	0	0	-0.007	0	0	0
1889	-0.15	0	0	0	-0.07	0	0	0	-0.22	0	0	0	0.014	0	0	0
1890	-0.423	0	0	0	-0.367	0	0	0	-0.446	0	0	0	-0.56	0	0	0
1891	-0.27	0	0	0	-0.183	0	0	0	-0.351	0	0	0	-0.215	0	0	0
1892	-0.408	0	0	0	-0.38	0	0	0	-0.407	0	0	0	-0.527	0	0	0
1893	-0.397	0	0	0	-0.406	0	0	0	-0.371	0	0	0	-0.523	0	0	0
1894	-0.418	0	0	0	-0.435	0	0	0	-0.397	0	0	0	-0.517	0	0	0
1895	-0.331	0	0	0	-0.255	0	0	0	-0.398	0	0	0	-0.209	0	0	0
1896	-0.127	0	0	0	-0.057	0	0	0	-0.211	0	0	0	0.07	0	0	0
1897	-0.176	0	0	0	-0.075	0	0	0	-0.279	0	0	0	0.099	0	0	0
1898	-0.403	0	0	0	-0.242	0	0	0	-0.537	0	0	0	-0.437	0	0	0
1899	-0.28	0	0	0	-0.201	0	0	0	-0.357	0	0	0	-0.219	0	0	0
1900	-0.2	0	0	0	-0.061	0	0	0	-0.345	0	0	0	0.042	0	0	0
1901	-0.321	0	0	0	-0.208	24.1609	-0.211472	100	-0.434	0	0	0	-0.182	0	0	0
1902	-0.411	0	0	0	-0.365	0	0	0	-0.48	0	0	0	-0.259	0	0	0
1903	-0.519	0	0	0	-0.44	0	0	0	-0.591	0	0	0	-0.39	0	0	0
1904	-0.533	0	0	0	-0.5	0	0	0	-0.559	0	0	0	-0.572	0	0	0
1905	-0.396	0	0	0	-0.366	0	0	0	-0.441	0	0	0	-0.271	0	0	0
1906	-0.345	0	0	0	-0.28	0	0	0	-0.393	0	0	0	-0.305	0	0	0
1907	-0.436	0	0	0	-0.412	0	0	0	-0.456	0	0	0	-0.409	0	0	0
1908	-0.539	0	0	0	-0.486	0	0	0	-0.596	0	0	0	-0.559	0	0	0
1909	-0.559	0	0	0	-0.494	0	0	0	-0.628	0	0	0	-0.5	0	0	0
1910	-0.568	0	0	0	-0.525	0	0	0	-0.619	0	0	0	-0.497	0	0	0
1911	-0.577	0	0	0	-0.456	0	0	0	-0.699	0	0	0	-0.547	0	0	0
1912	-0.44	0	0	0	-0.425	0	0	0	-0.477	0	0	0	-0.272	0	0	0
1913	-0.471	0	0	0	-0.525	0	0	0	-0.439	0	0	0	-0.344	0	0	0
1914	-0.316	0	0	0	-0.327	0	0	0	-0.326	0	0	0	-0.205	0	0	0
1915	-0.191	0	0	0	-0.159	0	0	0	-0.264	0	0	0	-0.072	0	0	0
1916	-0.401	0	0	0	-0.39	0	0	0	-0.411	0	0	0	-0.466	0	0	0
1917	-0.417	0	0	0	-0.424	0	0	0	-0.383	0	0	0	-0.507	0	0	0
1918	-0.347	0	0	0	-0.387	0	0	0	-0.273	0	0	0	-0.333	0	0	0
1919	-0.327	0	0	0	-0.374	0	0	0	-0.258	0	0	0	-0.236	0	0	0
1920	-0.272	0	0	0	-0.305	22.2661	0.256608	100	-0.209	0	0	0	-0.279	0	0	0
1921	-0.236	0	0	0	-0.208	0	0	0	-0.277	0	0	0	-0.222	0	0	0
1922	-0.326	0	0	0	-0.281	0	0	0	-0.378	0	0	0	-0.33	0	0	0
1923	-0.306	0	0	0	-0.289	0	0	0	-0.345	0	0	0	-0.248	0	0	0
1924	-0.284	0	0	0	-0.217	0	0	0	-0.375	0	0	0	-0.221	0	0	0
1925	-0.247	0	0	0	-0.198	0	0	0	-0.325	0	0	0	-0.195	34.5451	0.213082	100
1926	-0.128	0	0	0	-0.033	0	0	0	-0.269	0	0	0	0.082	0	0	0
1927	-0.192	0	0	0	-0.072	0	0	0	-0.332	0	0	0	-0.09	0	0	0
1928	-0.224	0	0	0	-0.152	0	0	0	-0.318	0	0	0	-0.151	0	0	0
1929	-0.297	0	0	0	-0.213	0	0	0	-0.413	0	0	0	-0.235	0	0	0
1930	-0.138	0	0	0	-0.023	0	0	0	-0.314	0	0	0	-0.022	0	0	0
1931	-0.096	0	0	0	-0.007	0	0	0	-0.237	0	0	0	0.125	0	0	0
1932	-0.166	0	0	0	-0.105	0	0	0	-0.243	0	0	0	-0.128	0	0	0
1933	-0.238	0	0	0	-0.143	0	0	0	-0.355	0	0	0	-0.211	0	0	0
1934	-0.189	0	0	0	-0.144	0	0	0	-0.244	0	0	0	-0.219	0	0	0
1935	-0.185	82.3115	0.279393	100	-0.112	23.78	0.178548	100	-0.277	0	0	0	-0.148	0	0	0
1936	-0.151	0	0	0	-0.033	0	0	0	-0.281	76.4253	0.281372	100	-0.084	0	0	0
1937	-0.009	0	0	0	0.104	0	0	0	-0.145	0	0	0	0.062	0	0	0
1938	-0.086	0	0	0	-0.022	0	0	0	-0.141	0	0	0	-0.18	0	0	0
1939	-0.079	0	0	0	-0.072	0	0	0	-0.109	0	0	0	-0.146	0	0	0
1940	0.016	0	0	0	-0.005	0	0	0	0.035	0	0	0	0.182	0	0	0
1941	0.063	0	0	0	0.065	0	0	0	0.016	0	0	0	0.261	0	0	0
1942	0.014	0	0	0	0.103	0	0	0	-0.075	0	0	0	-0.089	0	0	0
1943	-0.003	0	0	0	0.06	0	0	0	-0.038	0	0	0	-0.214	0	0	0
1944	0.147	0	0	0	0.177	0	0	0	0.116	0	0	0	0.077	0	0	0
1945	0.134	0	0	0	0.168	0	0	0	0.077	0	0	0	0.087	0	0	0
1946	-0.017	0	0	0	0.079	0	0	0	-0.142	0	0	0	-0.024	0	0	0
1947	-0.056	0	0	0	-0.005	0	0	0	-0.113	0	0	0	-0.014	0	0	0
1948	-0.048	0	0	0	0.029	0	0	0	-0.136	0	0	0	-0.069	0	0	0
1949	-0.053	0	0	0	-0.02	0	0	0	-0.078	0	0	0	-0.165	0	0	0
1950	-0.082	0	0	0	-0.014	0	0	0	-0.133	0	0	0	-0.272	0	0	0
1951	0.004	0	0	0	0.125	0	0	0	-0.166	0	0	0	0.017	0	0	0
1952	0.087	0	0	0	0.133	0	0	0	0.048	0	0	0	0.042	0	0	0
1953	0.09	0	0	0	0.134	0	0	0	0.03	0	0	0	0.114	0	0	0
1954	-0.097	0	0	0	0.004	0	0	0	-0.191	0	0	0	-0.233	0	0	0
1955	-0.162	0	0	0	-0.036	0	0	0	-0.284	0	0	0	-0.358	0	0	0
1956	-0.163	0	0	0	-0.109	0	0	0	-0.195	0	0	0	-0.318	0	0	0
1957	0.051	0	0	0	0.104	0	0	0	-0.023	0	0	0	0.089	0	0	0
1958	0.083	0	0	0	0.195	0	0	0	-0.05	0	0	0	0.158	0	0	0
1959	0.041	0	0	0	0.131	0	0	0	-0.056	0	0	0	0.028	0	0	0
1960	-0.002	0	0	0	0.096	0	0	0	-0.101	0	0	0	-0.029	0	0	0
1961	0.053	0	0	0	0.121	0	0	0	0	0	0	0	-0.057	0	0	0
1962	0.01	0	0	0	0.074	0	0	0	-0.042	0	0	0	-0.083	0	0	0
1963	0.059	0	0	0	0.147	0	0	0	-0.063	0	0	0	0.15	0	0	0
1964	-0.149	0	0	0	-0.02	0	0	0	-0.268	0	0	0	-0.147	0	0	0
1965	-0.109	0	0	0	-0.055	0	0	0	-0.187	0	0	0	-0.025	0	0	0
1966	-0.001	0	0	0	0.133	0	0	0	-0.156	0	0	0	0.105	0	0	0
1967	-0.056	0	0	0	0.089	0	0	0	-0.19	0	0	0	-0.178	0	0	0
1968	-0.053	0	0	0	0.045	0	0	0	-0.162	0	0	0	-0.059	0	0	0
1969	0.114	0	0	0	0.102	0	0	0	0.098	0	0	0	0.305	0	0	0
1970	-0.01	0	0	0	0.014	0	0	0	-0.021	0	0	0	-0.015	0	0	0
1971	-0.19	0	0	0	-0.202	0	0	0	-0.147	0	0	0	-0.358	0	0	0
1972	0.005	0	0	0	-0.107	0	0	0	0.085	0	0	0	0.114	0	0	0
1973	0.015	0	0	0	-0.055	0	0	0	0.097	0	0	0	0.025	0	0	0
1974	-0.162	0	0	0	-0.198	0	0	0	-0.094	0	0	0	-0.332	0	0	0
1975	-0.19	0	0	0	-0.209	0	0	0	-0.129	0	0	0	-0.418	0	0	0
1976	-0.18	0	0	0	-0.233	0	0	0	-0.123	0	0	0	-0.257	0	0	0
1977	0.005	0	0	0	-0.045	0	0	0	0.051	0	0	0	0.004	0	0	0
1978	-0.062	0	0	0	-0.063	0	0	0	-0.05	28.511	0.184232	100	-0.1	15.0439	0.185524	100
1979	0.063	0	0	0	0.017	0	0	0	0.099	0	0	0	0.064	0	0	0
1980	0.054	0	0	0	0.012	0	0	0	0.091	0	0	0	0.084	0	0	0
1981	0.027	0	0	0	0.02	0	0	0	0.039	0	0	0	-0.014	0	0	0
1982	0.013	0	0	0	-0.018	0	0	0	0.016	0	0	0	0.146	0	0	0
1983	0.119	0	0	0	0.023	0	0	0	0.178	0	0	0	0.3	0	0	0
1984	-0.01	0	0	0	-0.086	0	0	0	0.077	0	0	0	-0.033	0	0	0
1985	-0.04	0	0	0	-0.146	0	0	0	0.076	0	0	0	-0.145	0	0	0
1986	-0.013	19.9706	0.154721	100	-0.082	0	0	0	0.039	0	0	0	0.021	0	0	0
1987	0.145	0	0	0	0.055	0	0	0	0.177	0	0	0	0.397	0	0	0
1988	0.108	0	0	0	0.08	0	0	0	0.145	0	0	0	0.137	0	0	0
1989	0.069	0	0	0	0.06	0	0	0	0.09	0	0	0	-0.045	0	0	0
1990	0.198	0	0	0	0.242	0	0	0	0.146	0	0	0	0.178	0	0	0
1991	0.174	0	0	0	0.18	0	0	0	0.148	0	0	0	0.221	0	0	0
1992	0.09	0	0	0	0.043	0	0	0	0.118	0	0	0	0.148	0	0	0
1993	0.104	0	0	0	0.057	0	0	0	0.135	0	0	0	0.151	0	0	0
1994	0.146	0	0	0	0.192	0	0	0	0.092	0	0	0	0.16	0	0	0
1995	0.188	0	0	0	0.237	0	0	0	0.14	0	0	0	0.253	0	0	0
1996	0.14	20.11	0.213979	100	0.123	54.9079	0.371326	100	0.164	27.0979	0.188906	100	0.144	14.3502	0.22352	100
1997	0.318	0	0	0	0.322	0	0	0	0.281	0	0	0	0.408	0	0	0
1998	0.416	0	0	0	0.413	0	0	0	0.394	0	0	0	0.559	0	0	0
1999	0.197	0	0	0	0.212	0	0	0	0.213	0	0	0	0.031	0	0	0
2000	0.216	0	0	0	0.244	0	0	0	0.204	0	0	0	0.094	0	0	0
2001	0.329	0	0	0	0.34	0	0	0	0.327	0	0	0	0.265	0	0	0
2002	0.368	0	0	0	0.363	0	0	0	0.35	0	0	0	0.428	0	0	0
2003	0.393	0	0	0	0.449	0	0	0	0.323	0	0	0	0.47	0	0	0
2004	0.354	0	0	0	0.467	0	0	0	0.243	0	0	0	0.376	0	0	0
2005	0.389	0	0	0	0.484	0	0	0	0.303	0	0	0	0.406	0	0	0
2006	0.365	0	0	0	0.44	0	0	0	0.29	0	0	0	0.393	0	0	0
2007	0.296	0	0	0	0.386	0	0	0	0.224	0	0	0	0.274	0	0	0
2008	0.259	0	0	0	0.352	0	0	0	0.19	0	0	0	0.17	0	0	0
2009	0.395	0	0	0	0.417	0	0	0	0.361	0	0	0	0.48	0	0	0
2010	0.406	0	0	0	0.456	0	0	0	0.362	0	0	0	0.457	0	0	0
2011	0.29	0	0	0	0.317	0	0	0	0.278	0	0	0	0.134	0	0	0
2012	0.346	0	0	0	0.413	0	0	0	0.287	0	0	0	0.278	0	0	0
2013	0.376	0	0	0	0.451	0	0	0	0.303	0	0	0	0.333	0	0	0
2014	0.477	0	0	0	0.617	0	0	0	0.335	0	0	0	0.451	0	0	0
2015	0.457	0	0	0	0.514	0	0	0	0.392	0	0	0	0.504	0	0	0
years/ys	globe	nh	sh	tropics
1850	-0.315	-0.246	-0.401	-0.265
1851	-0.191	-0.127	-0.274	-0.218
1852	-0.185	-0.026	-0.357	-0.154
1853	-0.217	-0.079	-0.363	-0.125
1854	-0.247	-0.054	-0.421	-0.163
1855	-0.213	-0.065	-0.349	-0.158
1856	-0.306	-0.29	-0.319	-0.294
1857	-0.435	-0.34	-0.499	-0.548
1858	-0.453	-0.379	-0.509	-0.486
1859	-0.33	-0.334	-0.335	-0.283
1860	-0.256	-0.154	-0.311	-0.341
1861	-0.404	-0.191	-0.498	-0.409
1862	-0.399	-0.483	-0.36	-0.385
1863	-0.358	-0.448	-0.307	-0.427
1864	-0.39	-0.237	-0.441	-0.53
1865	-0.236	-0.102	-0.285	-0.113
1866	-0.216	-0.132	-0.258	-0.167
1867	-0.218	-0.07	-0.281	-0.119
1868	-0.223	0.065	-0.335	-0.062
1869	-0.262	-0.055	-0.38	-0.171
1870	-0.231	-0.018	-0.332	-0.264
1871	-0.229	-0.194	-0.252	-0.182
1872	-0.228	-0.172	-0.262	-0.277
1873	-0.285	-0.247	-0.304	-0.31
1874	-0.398	-0.3	-0.428	-0.518
1875	-0.248	-0.226	-0.262	-0.253
1876	-0.356	-0.253	-0.423	-0.346
1877	-0.033	0.139	-0.162	0.112
1878	0.017	0.168	-0.12	0.297
1879	-0.187	-0.138	-0.201	-0.261
1880	-0.185	-0.142	-0.207	-0.22
1881	-0.148	-0.147	-0.161	-0.031
1882	-0.199	-0.221	-0.17	-0.273
1883	-0.235	-0.251	-0.217	-0.337
1884	-0.337	-0.332	-0.343	-0.373
1885	-0.324	-0.236	-0.411	-0.261
1886	-0.335	-0.252	-0.399	-0.298
1887	-0.399	-0.292	-0.477	-0.431
1888	-0.234	-0.097	-0.363	-0.007
1889	-0.15	-0.07	-0.22	0.014
1890	-0.423	-0.367	-0.446	-0.56
1891	-0.27	-0.183	-0.351	-0.215
1892	-0.408	-0.38	-0.407	-0.527
1893	-0.397	-0.406	-0.371	-0.523
1894	-0.418	-0.435	-0.397	-0.517
1895	-0.331	-0.255	-0.398	-0.209
1896	-0.127	-0.057	-0.211	0.07
1897	-0.176	-0.075	-0.279	0.099
1898	-0.403	-0.242	-0.537	-0.437
1899	-0.28	-0.201	-0.357	-0.219
1900	-0.2	-0.061	-0.345	0.042
1901	-0.321	-0.208	-0.434	-0.182
1902	-0.411	-0.365	-0.48	-0.259
1903	-0.519	-0.44	-0.591	-0.39
1904	-0.533	-0.5	-0.559	-0.572
1905	-0.396	-0.366	-0.441	-0.271
1906	-0.345	-0.28	-0.393	-0.305
1907	-0.436	-0.412	-0.456	-0.409
1908	-0.539	-0.486	-0.596	-0.559
1909	-0.559	-0.494	-0.628	-0.5
1910	-0.568	-0.525	-0.619	-0.497
1911	-0.577	-0.456	-0.699	-0.547
1912	-0.44	-0.425	-0.477	-0.272
1913	-0.471	-0.525	-0.439	-0.344
1914	-0.316	-0.327	-0.326	-0.205
1915	-0.191	-0.159	-0.264	-0.072
1916	-0.401	-0.39	-0.411	-0.466
1917	-0.417	-0.424	-0.383	-0.507
1918	-0.347	-0.387	-0.273	-0.333
1919	-0.327	-0.374	-0.258	-0.236
1920	-0.272	-0.305	-0.209	-0.279
1921	-0.236	-0.208	-0.277	-0.222
1922	-0.326	-0.281	-0.378	-0.33
1923	-0.306	-0.289	-0.345	-0.248
1924	-0.284	-0.217	-0.375	-0.221
1925	-0.247	-0.198	-0.325	-0.195
1926	-0.128	-0.033	-0.269	0.082
1927	-0.192	-0.072	-0.332	-0.09
1928	-0.224	-0.152	-0.318	-0.151
1929	-0.297	-0.213	-0.413	-0.235
1930	-0.138	-0.023	-0.314	-0.022
1931	-0.096	-0.007	-0.237	0.125
1932	-0.166	-0.105	-0.243	-0.128
1933	-0.238	-0.143	-0.355	-0.211
1934	-0.189	-0.144	-0.244	-0.219
1935	-0.185	-0.112	-0.277	-0.148
1936	-0.151	-0.033	-0.281	-0.084
1937	-0.009	0.104	-0.145	0.062
1938	-0.086	-0.022	-0.141	-0.18
1939	-0.079	-0.072	-0.109	-0.146
1940	0.016	-0.005	0.035	0.182
1941	0.063	0.065	0.016	0.261
1942	0.014	0.103	-0.075	-0.089
1943	-0.003	0.06	-0.038	-0.214
1944	0.147	0.177	0.116	0.077
1945	0.134	0.168	0.077	0.087
1946	-0.017	0.079	-0.142	-0.024
1947	-0.056	-0.005	-0.113	-0.014
1948	-0.048	0.029	-0.136	-0.069
1949	-0.053	-0.02	-0.078	-0.165
1950	-0.082	-0.014	-0.133	-0.272
1951	0.004	0.125	-0.166	0.017
1952	0.087	0.133	0.048	0.042
1953	0.09	0.134	0.03	0.114
1954	-0.097	0.004	-0.191	-0.233
1955	-0.162	-0.036	-0.284	-0.358
1956	-0.163	-0.109	-0.195	-0.318
1957	0.051	0.104	-0.023	0.089
1958	0.083	0.195	-0.05	0.158
1959	0.041	0.131	-0.056	0.028
1960	-0.002	0.096	-0.101	-0.029
1961	0.053	0.121	0	-0.057
1962	0.01	0.074	-0.042	-0.083
1963	0.059	0.147	-0.063	0.15
1964	-0.149	-0.02	-0.268	-0.147
1965	-0.109	-0.055	-0.187	-0.025
1966	-0.001	0.133	-0.156	0.105
1967	-0.056	0.089	-0.19	-0.178
1968	-0.053	0.045	-0.162	-0.059
1969	0.114	0.102	0.098	0.305
1970	-0.01	0.014	-0.021	-0.015
1971	-0.19	-0.202	-0.147	-0.358
1972	0.005	-0.107	0.085	0.114
1973	0.015	-0.055	0.097	0.025
1974	-0.162	-0.198	-0.094	-0.332
1975	-0.19	-0.209	-0.129	-0.418
1976	-0.18	-0.233	-0.123	-0.257
1977	0.005	-0.045	0.051	0.004
1978	-0.062	-0.063	-0.05	-0.1
1979	0.063	0.017	0.099	0.064
1980	0.054	0.012	0.091	0.084
1981	0.027	0.02	0.039	-0.014
1982	0.013	-0.018	0.016	0.146
1983	0.119	0.023	0.178	0.3
1984	-0.01	-0.086	0.077	-0.033
1985	-0.04	-0.146	0.076	-0.145
1986	-0.013	-0.082	0.039	0.021
1987	0.145	0.055	0.177	0.397
1988	0.108	0.08	0.145	0.137
1989	0.069	0.06	0.09	-0.045
1990	0.198	0.242	0.146	0.178
1991	0.174	0.18	0.148	0.221
1992	0.09	0.043	0.118	0.148
1993	0.104	0.057	0.135	0.151
1994	0.146	0.192	0.092	0.16
1995	0.188	0.237	0.14	0.253
1996	0.14	0.123	0.164	0.144
1997	0.318	0.322	0.281	0.408
1998	0.416	0.413	0.394	0.559
1999	0.197	0.212	0.213	0.031
2000	0.216	0.244	0.204	0.094
2001	0.329	0.34	0.327	0.265
2002	0.368	0.363	0.35	0.428
2003	0.393	0.449	0.323	0.47
2004	0.354	0.467	0.243	0.376
2005	0.389	0.484	0.303	0.406
2006	0.365	0.44	0.29	0.393
2007	0.296	0.386	0.224	0.274
2008	0.259	0.352	0.19	0.17
2009	0.395	0.417	0.361	0.48
2010	0.406	0.456	0.362	0.457
2011	0.29	0.317	0.278	0.134
2012	0.346	0.413	0.287	0.278
2013	0.376	0.451	0.303	0.333
2014	0.477	0.617	0.335	0.451
2015	0.457	0.514	0.392	0.504
years/Ti	globe_Ti	nh_Ti	sh_Ti	tropics_Ti
1850	0	0	0	0
1851	0	0	0	0
1852	0	0	0	0
1853	0	0	0	0
1854	0	0	0	0
1855	0	0	0	0
1856	0	0	0	0
1857	0	0	0	0
1858	0	0	0	0
1859	0	0	0	0
1860	0	0	0	0
1861	0	0	0	0
1862	0	0	0	0
1863	0	0	0	0
1864	0	0	0	0
1865	0	0	0	0
1866	0	0	0	0
1867	0	0	0	0
1868	0	0	0	0
1869	0	0	0	0
1870	0	0	0	0
1871	0	0	0	0
1872	0	0	0	0
1873	0	0	0	0
1874	0	0	0	0
1875	0	0	0	0
1876	0	0	0	0
1877	0	0	0	0
1878	0	0	0	0
1879	0	0	0	0
1880	0	0	0	0
1881	0	0	0	0
1882	0	0	0	0
1883	0	0	0	0
1884	0	0	0	0
1885	0	0	0	0
1886	0	0	0	0
1887	0	0	0	0
1888	0	0	0	0
1889	0	0	0	0
1890	0	0	0	0
1891	0	0	0	0
1892	0	0	0	0
1893	0	0	0	0
1894	0	0	0	0
1895	0	0	0	0
1896	0	0	0	0
1897	0	0	0	0
1898	0	0	0	0
1899	0	0	0	0
1900	0	0	0	0
1901	0	24.1609	0	0
1902	0	0	0	0
1903	0	0	0	0
1904	0	0	0	0
1905	0	0	0	0
1906	0	0	0	0
1907	0	0	0	0
1908	0	0	0	0
1909	0	0	0	0
1910	0	0	0	0
1911	0	0	0	0
1912	0	0	0	0
1913	0	0	0	0
1914	0	0	0	0
1915	0	0	0	0
1916	0	0	0	0
1917	0	0	0	0
1918	0	0	0	0
1919	0	0	0	0
1920	0	22.2661	0	0
1921	0	0	0	0
1922	0	0	0	0
1923	0	0	0	0
1924	0	0	0	0
1925	0	0	0	34.5451
1926	0	0	0	0
1927	0	0	0	0
1928	0	0	0	0
1929	0	0	0	0
1930	0	0	0	0
1931	0	0	0	0
1932	0	0	0	0
1933	0	0	0	0
1934	0	0	0	0
1935	82.3115	23.78	0	0
1936	0	0	76.4253	0
1937	0	0	0	0
1938	0	0	0	0
1939	0	0	0	0
1940	0	0	0	0
1941	0	0	0	0
1942	0	0	0	0
1943	0	0	0	0
1944	0	0	0	0
1945	0	0	0	0
1946	0	0	0	0
1947	0	0	0	0
1948	0	0	0	0
1949	0	0	0	0
1950	0	0	0	0
1951	0	0	0	0
1952	0	0	0	0
1953	0	0	0	0
1954	0	0	0	0
1955	0	0	0	0
1956	0	0	0	0
1957	0	0	0	0
1958	0	0	0	0
1959	0	0	0	0
1960	0	0	0	0
1961	0	0	0	0
1962	0	0	0	0
1963	0	0	0	0
1964	0	0	0	0
1965	0	0	0	0
1966	0	0	0	0
1967	0	0	0	0
1968	0	0	0	0
1969	0	0	0	0
1970	0	0	0	0
1971	0	0	0	0
1972	0	0	0	0
1973	0	0	0	0
1974	0	0	0	0
1975	0	0	0	0
1976	0	0	0	0
1977	0	0	0	0
1978	0	0	28.511	15.0439
1979	0	0	0	0
1980	0	0	0	0
1981	0	0	0	0
1982	0	0	0	0
1983	0	0	0	0
1984	0	0	0	0
1985	0	0	0	0
1986	19.9706	0	0	0
1987	0	0	0	0
1988	0	0	0	0
1989	0	0	0	0
1990	0	0	0	0
1991	0	0	0	0
1992	0	0	0	0
1993	0	0	0	0
1994	0	0	0	0
1995	0	0	0	0
1996	20.11	54.9079	27.0979	14.3502
1997	0	0	0	0
1998	0	0	0	0
1999	0	0	0	0
2000	0	0	0	0
2001	0	0	0	0
2002	0	0	0	0
2003	0	0	0	0
2004	0	0	0	0
2005	0	0	0	0
2006	0	0	0	0
2007	0	0	0	0
2008	0	0	0	0
2009	0	0	0	0
2010	0	0	0	0
2011	0	0	0	0
2012	0	0	0	0
2013	0	0	0	0
2014	0	0	0	0
2015	0	0	0	0
years/Shifts	globe_Ti	nh_Ti	sh_Ti	tropics_Ti
1850	0	0	0	0
1851	0	0	0	0
1852	0	0	0	0
1853	0	0	0	0
1854	0	0	0	0
1855	0	0	0	0
1856	0	0	0	0
1857	0	0	0	0
1858	0	0	0	0
1859	0	0	0	0
1860	0	0	0	0
1861	0	0	0	0
1862	0	0	0	0
1863	0	0	0	0
1864	0	0	0	0
1865	0	0	0	0
1866	0	0	0	0
1867	0	0	0	0
1868	0	0	0	0
1869	0	0	0	0
1870	0	0	0	0
1871	0	0	0	0
1872	0	0	0	0
1873	0	0	0	0
1874	0	0	0	0
1875	0	0	0	0
1876	0	0	0	0
1877	0	0	0	0
1878	0	0	0	0
1879	0	0	0	0
1880	0	0	0	0
1881	0	0	0	0
1882	0	0	0	0
1883	0	0	0	0
1884	0	0	0	0
1885	0	0	0	0
1886	0	0	0	0
1887	0	0	0	0
1888	0	0	0	0
1889	0	0	0	0
1890	0	0	0	0
1891	0	0	0	0
1892	0	0	0	0
1893	0	0	0	0
1894	0	0	0	0
1895	0	0	0	0
1896	0	0	0	0
1897	0	0	0	0
1898	0	0	0	0
1899	0	0	0	0
1900	0	0	0	0
1901	0	-0.211472	0	0
1902	0	0	0	0
1903	0	0	0	0
1904	0	0	0	0
1905	0	0	0	0
1906	0	0	0	0
1907	0	0	0	0
1908	0	0	0	0
1909	0	0	0	0
1910	0	0	0	0
1911	0	0	0	0
1912	0	0	0	0
1913	0	0	0	0
1914	0	0	0	0
1915	0	0	0	0
1916	0	0	0	0
1917	0	0	0	0
1918	0	0	0	0
1919	0	0	0	0
1920	0	0.256608	0	0
1921	0	0	0	0
1922	0	0	0	0
1923	0	0	0	0
1924	0	0	0	0
1925	0	0	0	0.213082
1926	0	0	0	0
1927	0	0	0	0
1928	0	0	0	0
1929	0	0	0	0
1930	0	0	0	0
1931	0	0	0	0
1932	0	0	0	0
1933	0	0	0	0
1934	0	0	0	0
1935	0.279393	0.178548	0	0
1936	0	0	0.281372	0
1937	0	0	0	0
1938	0	0	0	0
1939	0	0	0	0
1940	0	0	0	0
1941	0	0	0	0
1942	0	0	0	0
1943	0	0	0	0
1944	0	0	0	0
1945	0	0	0	0
1946	0	0	0	0
1947	0	0	0	0
1948	0	0	0	0
1949	0	0	0	0
1950	0	0	0	0
1951	0	0	0	0
1952	0	0	0	0
1953	0	0	0	0
1954	0	0	0	0
1955	0	0	0	0
1956	0	0	0	0
1957	0	0	0	0
1958	0	0	0	0
1959	0	0	0	0
1960	0	0	0	0
1961	0	0	0	0
1962	0	0	0	0
1963	0	0	0	0
1964	0	0	0	0
1965	0	0	0	0
1966	0	0	0	0
1967	0	0	0	0
1968	0	0	0	0
1969	0	0	0	0
1970	0	0	0	0
1971	0	0	0	0
1972	0	0	0	0
1973	0	0	0	0
1974	0	0	0	0
1975	0	0	0	0
1976	0	0	0	0
1977	0	0	0	0
1978	0	0	0.184232	0.185524
1979	0	0	0	0
1980	0	0	0	0
1981	0	0	0	0
1982	0	0	0	0
1983	0	0	0	0
1984	0	0	0	0
1985	0	0	0	0
1986	0.154721	0	0	0
1987	0	0	0	0
1988	0	0	0	0
1989	0	0	0	0
1990	0	0	0	0
1991	0	0	0	0
1992	0	0	0	0
1993	0	0	0	0
1994	0	0	0	0
1995	0	0	0	0
1996	0.213979	0.371326	0.188906	0.22352
1997	0	0	0	0
1998	0	0	0	0
1999	0	0	0	0
2000	0	0	0	0
2001	0	0	0	0
2002	0	0	0	0
2003	0	0	0	0
2004	0	0	0	0
2005	0	0	0	0
2006	0	0	0	0
2007	0	0	0	0
2008	0	0	0	0
2009	0	0	0	0
2010	0	0	0	0
2011	0	0	0	0
2012	0	0	0	0
2013	0	0	0	0
2014	0	0	0	0
2015	0	0	0	0
years	freq
globe	100
nh	100
sh	100
tropics	100
metadata
globe	['globe'	[''	['losed'	''	'16:19:02	Tue	26-May-2015']]]
['globe'	[''	['ersion'	'numbers']]]
['globe'	[''	['huffleRpt'	'$Revision$']]]
['globe'	[''	['huffle'	'$Revision:'	'286'	'$']]]
['globe'	[''	['ivariate_multi'	'as'	'bivariate'	'$Revision:'	'297'	'$']]]
['globe'	[''	['onvergentBreaks'	'as'	'convergent_breaks'	'$Revision:'	'286'	'$']]]
['globe'	[''	['egress'	'$Revision:'	'291'	'$']]]
['globe'	[''	['tatbreaks'	'$Revision:'	'288'	'$']]]
nh	['nh'	[''	['losed'	''	'16:19:09	Tue	26-May-2015']]]
['nh'	[''	['ersion'	'numbers']]]
['nh'	[''	['huffleRpt'	'$Revision$']]]
['nh'	[''	['huffle'	'$Revision:'	'286'	'$']]]
['nh'	[''	['ivariate_multi'	'as'	'bivariate'	'$Revision:'	'297'	'$']]]
['nh'	[''	['onvergentBreaks'	'as'	'convergent_breaks'	'$Revision:'	'286'	'$']]]
['nh'	[''	['egress'	'$Revision:'	'291'	'$']]]
['nh'	[''	['tatbreaks'	'$Revision:'	'288'	'$']]]
sh	['sh'	[''	['losed'	''	'16:19:14	Tue	26-May-2015']]]
['sh'	[''	['ersion'	'numbers']]]
['sh'	[''	['huffleRpt'	'$Revision$']]]
['sh'	[''	['huffle'	'$Revision:'	'286'	'$']]]
['sh'	[''	['ivariate_multi'	'as'	'bivariate'	'$Revision:'	'297'	'$']]]
['sh'	[''	['onvergentBreaks'	'as'	'convergent_breaks'	'$Revision:'	'286'	'$']]]
['sh'	[''	['egress'	'$Revision:'	'291'	'$']]]
['sh'	[''	['tatbreaks'	'$Revision:'	'288'	'$']]]
tropics	['tropics'	[''	['losed'	''	'16:19:19	Tue	26-May-2015']]]
['tropics'	[''	['ersion'	'numbers']]]
['tropics'	[''	['huffleRpt'	'$Revision$']]]
['tropics'	[''	['huffle'	'$Revision:'	'286'	'$']]]
['tropics'	[''	['ivariate_multi'	'as'	'bivariate'	'$Revision:'	'297'	'$']]]
['tropics'	[''	['onvergentBreaks'	'as'	'convergent_breaks'	'$Revision:'	'286'	'$']]]
['tropics'	[''	['egress'	'$Revision:'	'291'	'$']]]
['tropics'	[''	['tatbreaks'	'$Revision:'	'288'	'$']]]

[truncated: 18 more sheets: Readme-HadSST, CRUtem4, TS-CRUtem4, NCDC_All_Zones, TS-NCDC, Readme-NCDC, GISS, TS-GISS, COWTAN_WAY_3, TS-C&W, BERKELEY_3, TS-BEST, SEA Obs CRU, SEA TavARW Results, CET Obs CRU 2014, CET TavARW Results, Texas Obs CRU, Texas TavARW Results]
